# Supplementary material for: Synthesis of 3(2H)-furanone derivatives: p-TsOH/halotrimethylsilane promoted cycloketonization of γ-hydroxyl ynones
Source: Royal Society of Chemistry journal article supplement (doi:10.1039/d3ob01500a), 2023-01-01

# Supporting Information

## Synthesis of 3(2*H*)-Furanone Derivatives: *p*-TsOH/Halotrimethylsilane Promoted Cycloketonization of $\gamma$ -Hydroxyl Ynones

Yi-Feng Qiu,<sup>\*,a</sup> Jian-He Cao,<sup>a</sup> Shutao Wang,<sup>b</sup> Qiang Wang,<sup>a</sup>

Ming Li,<sup>a</sup> Jun-Jiao Wang,<sup>a</sup> Zheng-Jun Quan,<sup>\*,a</sup> and Xi-Cun Wang<sup>\*,a</sup>

<sup>a</sup>College of Chemistry and Chemical Engineering, Northwest Normal University, Lanzhou, Gansu 730070, P. R. China

<sup>b</sup>State Key Laboratory of Applied Organic Chemistry, Lanzhou University, Lanzhou 730000, P. R. China

## Table of Contents

|                                                                            |           |
|----------------------------------------------------------------------------|-----------|
| <b>General Remarks .....</b>                                               | <b>1</b>  |
| <b>Computational Study .....</b>                                           | <b>2</b>  |
| <b>General Procedure for the Preparation of Starting Materials...</b>      | <b>5</b>  |
| <b>General Procedure for the Synthesis of Products .....</b>               | <b>7</b>  |
| <b>X-ray Single Crystal Diffraction Data .....</b>                         | <b>8</b>  |
| <b>Characterization Data .....</b>                                         | <b>10</b> |
| <b><sup>1</sup>H, <sup>13</sup>C, and <sup>19</sup>F NMR Spectra .....</b> | <b>26</b> |

## General Remarks

Column chromatography was carried out on silica gel (200-300 mesh).  $^1\text{H}$  NMR spectra were recorded on 400, 500 or 600 MHz in  $\text{CDCl}_3$  or  $\text{d}_6$ -acetone and chemical shifts (ppm) were recorded with tetramethylsilane (TMS) as the internal reference standard.  $^{13}\text{C}$  NMR spectra were recorded on 100, 126 or 151 MHz in  $\text{CDCl}_3$  or  $\text{d}_6$ -acetone, and  $^{19}\text{F}$  spectra were recorded on 376 or 471 MHz in  $\text{CDCl}_3$  or  $\text{d}_6$ -acetone ( $\text{CFCl}_3$  as outside standard and low field is positive). Multiplicities are given as: s (singlet), d (doublet), t (triplet), dd (doublet of doublets), or m (multiplet). IR spectra were recorded on a FT-IR spectrometer and only major peaks are reported in  $\text{cm}^{-1}$ . HR-MS was obtained using a Q-TOF instrument equipped with ESI source. X-Ray single crystal diffraction data were collected on a Bruker APEX-II CCD diffractometer equipped with liquid nitrogen cryogenic device. The crystal was grown in a mixed solvent of petroleum ether and  $\text{CH}_2\text{Cl}_2$  with an approximate ratio of 5:1. The copies of NMR spectra of all compounds are provided in the Supporting Information. Room temperature is 23–25 °C. THF was distilled immediately before use from Na/benzophenone. 1,2-DCE was distilled from  $\text{CaH}_2$  and stored in a dryer before use. Other commercially available reagents and solvents were used without further purification.

## Computational Study

### Computational methods

All calculations were carried out with the Gaussian 09 D.01 programs.<sup>1</sup> Ground state geometry were fully optimized by using density functional theory (DFT)<sup>2</sup> and the M06-2X<sup>3</sup> method with the 6-31G\*\* basic set all atoms. Frequency calculations have been performed to verify the optimized structures as local minima. The Mulliken charge analysis results are presented below.

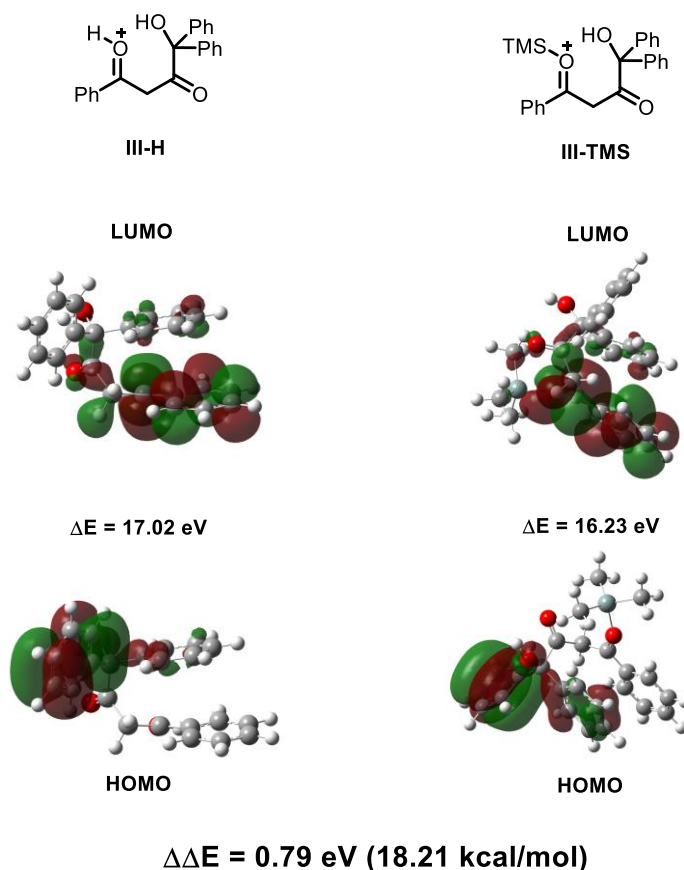

**Figure 1** Frontier molecular orbital analysis of two potential activation scenarios for intermediate **III**

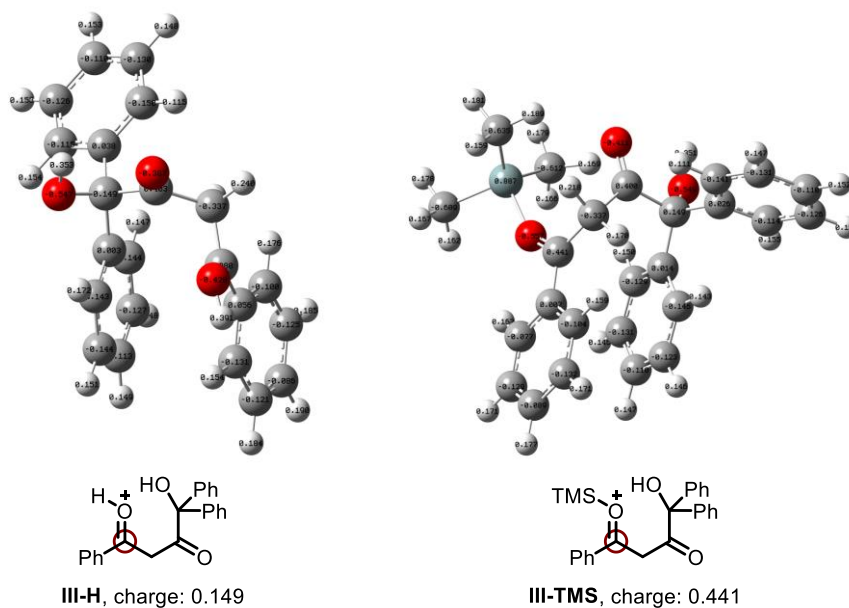

**Figure 2** Charge analysis of two potential activation scenarios for intermediate **III**

Two potential activation scenarios for intermediate **III**, namely Brønsted acid (**III-H**) and TMSCl (**III-TMS**), were considered. Through DFT calculations, it was determined that TMSCl (**III-TMS**) exhibits a lower energy gap of 18.21 kcal/mol between the highest occupied molecular orbital (HOMO) and the lowest unoccupied molecular orbital (LUMO) of intermediate **III** compared to Brønsted acid (**III-H**). Therefore, TMSCl is preferred over Brønsted acid in activating intermediate **III**.

Simultaneously, the charge analysis of the intermediate **III** activated through the two different methods is also taken into consideration. Evidently, in the case of intermediate **III** activated by TMSCl, the carbonyl carbon participating in the reaction exhibits a reduced electron cloud density, indicating heightened electrophilic activity.

These computational results are in agreement with experimental

observations.

## References:

1. Gaussian 16, Revision C.01, Frisch, M. J.; Trucks, G. W.; Schlegel, H. B.; Scuseria, G. E.; Robb, M. A.; Cheeseman, J. R.; Scalmani, G.; Barone, V.; Petersson, G. A.; Nakatsuji, H.; Li, X.; Caricato, M.; Marenich, A. V.; Bloino, J.; Janesko, B. G.; Gomperts, R.; Mennucci, B.; Hratchian, H. P.; Ortiz, J. V.; Izmaylov, A. F.; Sonnenberg, J. L.; Williams-Young, D.; Ding, F.; Lipparini, F.; Egidi, F.; Goings, J.; Peng, B.; Petrone, A.; Henderson, T.; Ranasinghe, D.; Zakrzewski, V. G.; Gao, J.; Rega, N.; Zheng, G.; Liang, W.; Hada, M.; Ehara, M.; Toyota, K.; Fukuda, R.; Hasegawa, J.; Ishida, M.; Nakajima, T.; Honda, Y.; Kitao, O.; Nakai, H.; Vreven, T.; Throssell, K.; Montgomery, J. A., Jr; Peralta, J. E.; Ogliaro, F.; Bearpark, M. J.; Heyd, J. J.; Brothers, E. N.; Kudin, K. N.; Staroverov, V. N.; Keith, T. A.; Kobayashi, R.; Normand, J.; Raghavachari, K.; Rendell, A. P.; Burant, J. C.; Iyengar, S. S.; Tomasi, J.; Cossi, M.; Millam, J. M.; Klene, M.; Adamo, C.; Cammi, R.; Ochterski, J. W.; Martin, R. L.; Morokuma, K.; Farkas, O.; Foresman, J. B.; Fox, D. J. Gaussian, Inc., Wallingford CT, 2016.

2. Parr, R. G.; Yang, W. Density-functional Theory of Atoms and Molecules; Oxford University Press: New York, 1989.

3. (a) Zhao, Y.; Schultz, N. E.; Truhlar, D. G., *J. Chem. Theory Comput.* 2006, 2, 364–382. (b) Zhao, Y.; Truhlar, D. G., *J. Phys. Chem. A.* 2006, 110, 13126–13130. (c) Zhao, Y.; Truhlar, D. G., *Acc. Chem. Res.* 2008, 41, 157–167. (d) Zhao, Y.; Truhlar, D. G., *Theor. Chem. Acc.* 2008, 120, 215–241. (e) Zhao, Y.; Truhlar, D. G., *J. Chem. Theory Comput.* 2009, 5, 324–333.

## General Procedure for the Preparation of Starting Materials

For the synthesis of **1aa**:

Ethynylmagnesium bromide (129.2 g/mol, 0.5 mol/L in THF, 24 mL, 1.2 equiv) was added dropwise into a stirred solution of benzophenone **A** (182.2 g/mol, 10 mmol, 1.82 g) in THF (35 mL) under argon. The mixture was allowed to stir at 65 °C in an oil bath for 4 h. After the completion of the reaction determined by TLC, the reaction mixture was quenched by addition of an aqueous saturated solution of NH<sub>4</sub>Cl (35 mL) and extracted with ethyl acetate (2×50 mL). The combined organic layers were washed with brine, dried over Na<sub>2</sub>SO<sub>4</sub>, and concentrated under reduced pressure. The resulting material 1,1-diphenylprop-2-yn-1-ol **B** (208.3 g/mol, 94%, 1.96 g, 9.4 mmol) was directly used for the next step without further purification.

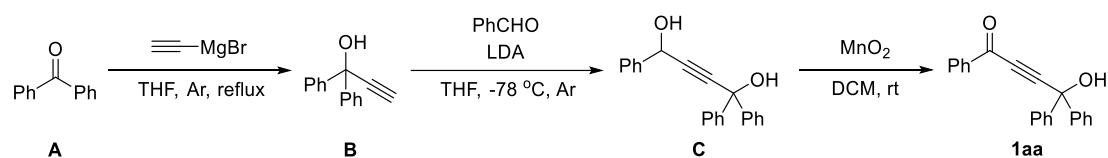

*n*-BuLi (64.1 g/mol, 2.5 mol/L in hexane, 14 mL) was added dropwise to a solution of diisopropylamine (101.2 g/mol, 3.54 g, 35 mmol) in anhydrous THF (10 mL) at -78 °C under an argon atmosphere. The mixture was allowed to stir for 1 h prior to subsequent slow addition of 1,1-diphenylprop-2-yn-1-ol **B** (208.3 g/mol, 2.08 g, 10 mmol). The mixture was allowed to stir at -78 °C for another 1 h. Benzaldehyde (106.1 g/mol, 1.59 g, 15 mmol, 1.5 equiv) dissolved in THF (5 mL) was added to the reaction

and stirred under the same conditions for 1 h. The mixture was then warmed to room temperature and stirred for 10 h. After the completion of the reaction determined by TLC, the reaction mixture was quenched by an aqueous saturated solution of  $\text{NH}_4\text{Cl}$  (30 mL) and extracted with ethyl acetate (2×50 mL). The organic layers were combined to be washed with brine and dried over  $\text{MgSO}_4$  for 30 min. Then the solution would be concentrated under reduced pressure and further purified by flash column chromatography (silica gel, petroleum ether/ethyl acetate, 4:1) to give 1,1,4-triphenylbut-2-yne-1,4-diol **C** (314.4 g/mol, 72%, 2.26 g).

$\text{MnO}_2$  (86.9 g/mol, 6.53 g, 75 mmol, 15 equiv) was added to a solution of 1,1,4-triphenylbut-2-yne-1,4-diol (**C**, 314.4 g/mol, 5 mmol, 1.57 g) in  $\text{CH}_2\text{Cl}_2$  (15 mL) at room temperature. The resulting mixture was stirred overnight. Then the solid was filtered, and the solvents were removed under reduced pressure. The residue was purified by flash column chromatography (silica gel, petroleum ether/ethyl acetate, 10:1) to give 4-hydroxy-1,4,4-triphenylbut-2-yn-1-one **1aa** (312.4 g/mol, 99%, 1.55 g).

## References:

1. S. R. Mothe, S. J. L. Lauw, P. Kothandaraman, P. W. H. Chan, *J. Org. Chem.* 2012, **77**, 6937–6947.
2. S. R. Mothe, M. L. Novianti, B. J. Ayers, P. W. H. Chan, *Org. Lett.* 2014, **16**, 4110–4113.
3. K. F. Lee, W. Bai, H. H. Y. Sung, I. D. Williams, Z. Lin, G. Jia, *Chem. – Eur. J.* 2018, **24**, 9760–9764.
4. Y.-F. Qiu, S.-P. Chen, J.-H. Cao, M. Li, Z.-J. Quan, X.-C. Wang, Y.-M. Liang, *Org. Lett.* 2022, **24**, 2264–2268.

## General Procedure for the Synthesis of Products

For the synthesis of **2aa**:

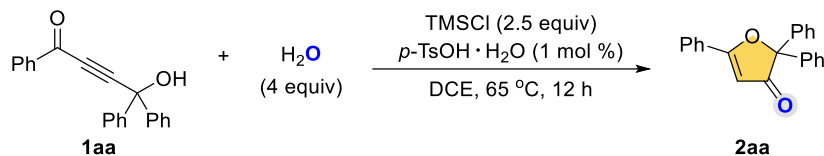

TMSCl (108.6 g/mol, 54.3mg, 2.5 equiv) was added to an oven-dried tube charged with of 4-hydroxy-1,4,4-triphenylbut-2-yn-1-one (**1aa**, 312.4 g/mol, 62.5 mg, 0.2 mmol) and *p*-TsOH·H<sub>2</sub>O (**2a**, 190.21 g/mol, 0.4 mg, 1 mol %) in anhydrous 1,2-DCE (2 mL). The resulting mixture was allowed to stir at 65 °C in an oil bath for 12 h, and then extracted with ethyl ether (2×15 mL), washed with a saturated aqueous solution of saturated brine, dried over Na<sub>2</sub>SO<sub>4</sub>, and evaporated under reduced pressure. The residue was further purified by chromatography on silica gel (petroleum ether/ethyl acetate, 20:1) to afford the product 2,2,5-triphenylfuran-3(2*H*)-one (**2aa**, 313.4 g/mol, 59.5 mg) in 95% yield.



## X-ray Single Crystal Diffraction Data

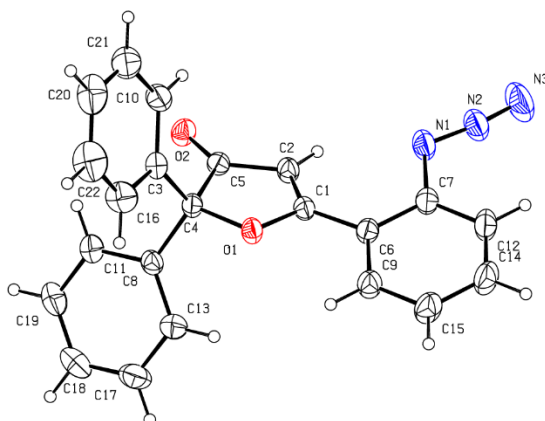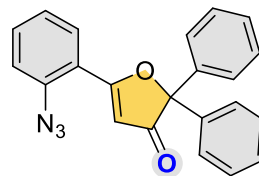

### 2ak CCDC: 2265194

The ellipsoid contour percent probability level is 30% in the caption of the thermal ellipsoid plot.

Bond precision: C-C = 0.0021 Å

Wavelength=1.54184

Cell: a=11.7255(2) b=19.0167(4) c=8.36520(18)  
 alpha=90 beta=105.134(2) gamma=90  
 Temperature: 296 K

|                        | Calculated    | Reported      |
|------------------------|---------------|---------------|
| Volume                 | 1800.58(6)    | 1800.58(7)    |
| Space group            | P 21/c        | P 1 21/c 1    |
| Hall group             | -P 2ybc       | -P 2ybc       |
| Moiety formula         | C22 H15 N3 O2 | C22 H15 N3 O2 |
| Sum formula            | C22 H15 N3 O2 | C22 H15 N3 O2 |
| Mr                     | 353.37        | 353.37        |
| Dx, g cm <sup>-3</sup> | 1.304         | 1.304         |
| Z                      | 4             | 4             |
| Mu (mm <sup>-1</sup> ) | 0.692         | 0.692         |
| F000                   | 736.0         | 736.0         |
| F000'                  | 738.22        |               |
| h,k,lmax               | 14,24,10      | 14,23,10      |
| Nref                   | 3828          | 3640          |
| Tmin,Tmax              | 0.913,0.940   | 0.683,1.000   |
| Tmin'                  | 0.901         |               |

Correction method= # Reported T Limits: Tmin=0.683 Tmax=1.000

AbsCorr = MULTI-SCAN

Data completeness= 0.951

Theta(max)= 77.300

R(reflections)= 0.0488( 3236)

wR2(reflections)= 0.1331( 3640)

S = 1.066

Npar= 244

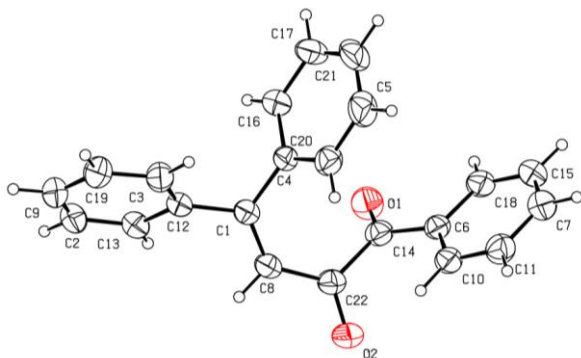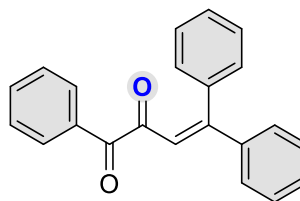

**5aa CCDC: 2265196**

The ellipsoid contour percent probability level is 30% in the caption of the thermal ellipsoid plot.

|                                                               |                                                |                                                |              |
|---------------------------------------------------------------|------------------------------------------------|------------------------------------------------|--------------|
| Bond precision:                                               | C-C = 0.0021 Å                                 | Wavelength=1.54184                             |              |
| Cell:                                                         | a=11.4368(3)                                   | b=6.67839(14)                                  | c=22.2255(6) |
|                                                               | alpha=90                                       | beta=91.647(2)                                 | gamma=90     |
| Temperature:                                                  | 304 K                                          |                                                |              |
|                                                               | Calculated                                     | Reported                                       |              |
| Volume                                                        | 1696.87(7)                                     | 1696.87(8)                                     |              |
| Space group                                                   | P 21/n                                         | P 1 21/n 1                                     |              |
| Hall group                                                    | -P 2yn                                         | -P 2yn                                         |              |
| Moiety formula                                                | C <sub>22</sub> H <sub>16</sub> O <sub>2</sub> | C <sub>22</sub> H <sub>16</sub> O <sub>2</sub> |              |
| Sum formula                                                   | C <sub>22</sub> H <sub>16</sub> O <sub>2</sub> | C <sub>22</sub> H <sub>16</sub> O <sub>2</sub> |              |
| Mr                                                            | 312.35                                         | 312.35                                         |              |
| Dx, g cm <sup>-3</sup>                                        | 1.223                                          | 1.223                                          |              |
| Z                                                             | 4                                              | 4                                              |              |
| Mu (mm <sup>-1</sup> )                                        | 0.612                                          | 0.612                                          |              |
| F <sub>000</sub>                                              | 656.0                                          | 656.0                                          |              |
| F <sub>000</sub> '                                            | 657.91                                         |                                                |              |
| h,k,lmax                                                      | 14,8,27                                        | 14,8,27                                        |              |
| Nref                                                          | 3545                                           | 3353                                           |              |
| Tmin,Tmax                                                     | 0.912,0.935                                    | 0.430,1.000                                    |              |
| Tmin'                                                         | 0.912                                          |                                                |              |
| Correction method= # Reported T Limits: Tmin=0.430 Tmax=1.000 |                                                |                                                |              |
| AbsCorr = MULTI-SCAN                                          |                                                |                                                |              |
| Data completeness=                                            | 0.946                                          | Theta(max)= 76.059                             |              |
| R(reflections)=                                               | 0.0422( 2776)                                  | wR2(reflections)= 0.1196( 3353)                |              |
| S =                                                           | 1.067                                          | Npar= 217                                      |              |

## Characterization Data

### Characterization Data of 2aa–2ar

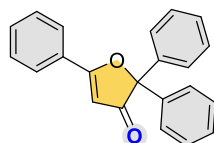

**2,2,5-triphenylfuran-3(2H)-one (2aa):** yellow solid; melting point 175–177 °C; 59.3 mg; 95%; <sup>1</sup>H NMR (400 MHz, CDCl<sub>3</sub>) δ ppm 7.97 (d, *J* = 7.6 Hz, 2H), 7.61–7.51 (m, 7H), 7.37–7.32 (m, 6H), 6.10 (s, 1H); <sup>13</sup>C NMR (151 MHz, CDCl<sub>3</sub>) δ ppm 202.1, 184.1, 138.4, 133.0, 129.0, 128.7, 128.4, 128.4, 127.3, 126.6, 99.8, 92.9. IR (neat, cm<sup>-1</sup>): 3085, 1695, 1603, 1351, 1173, 1054, 983, 881, 765, 694; HRMS (ESI) *m/z*: [M+H]<sup>+</sup> Calcd for C<sub>22</sub>H<sub>17</sub>O<sub>2</sub> 313.1223; Found 313.1228 (1.6 ppm). This product was purified by flash column chromatography (silica gel, petroleum ether/ethyl acetate, 20:1).

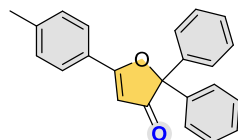

**2,2-diphenyl-5-(*p*-tolyl)furan-3(2H)-one (2ab):** yellow solid; melting point 149–151 °C; 58.8 mg; 90%; <sup>1</sup>H NMR (600 MHz, CDCl<sub>3</sub>) δ ppm 7.84 (d, *J* = 8.4 Hz, 2H), 7.55–7.54 (m, 4H), 7.35–7.32 (m, 4H), 7.31–7.29 (m, 4H), 6.04 (s, 1H), 2.42 (s, 3H); <sup>13</sup>C NMR (151 MHz, CDCl<sub>3</sub>) δ ppm 201.9, 184.3, 143.9, 138.5, 129.6, 128.4, 128.3, 127.2, 126.6, 125.9, 99.1, 92.8, 21.7. IR (neat, cm<sup>-1</sup>): 3065, 2917, 1695, 1565, 1349, 1173, 1056, 983, 822, 697; HRMS (ESI) *m/z*: [M+H]<sup>+</sup> Calcd for C<sub>23</sub>H<sub>19</sub>O<sub>2</sub> 327.1380; Found 327.1381 (0.3 ppm). This product was purified by flash column chromatography (silica gel, petroleum ether/ethyl acetate, 20:1).

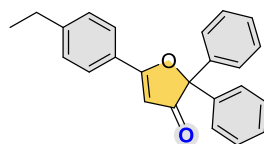

**5-(4-ethylphenyl)-2,2-diphenylfuran-3(2H)-one (2ac):** yellow solid; melting point 126–128 °C; 52.4 mg; 77%; <sup>1</sup>H NMR (600 MHz, CDCl<sub>3</sub>) δ ppm 7.88 (d, *J* = 5.2 Hz, 2H), 7.55–7.54 (m, 4H), 7.35–7.29 (m, 8H), 6.05 (s, 1H), 2.72 (dd, *J* = 10.0 Hz 5.2 Hz, 2H), 1.26 (t, *J* = 5.2 Hz, 3H); <sup>13</sup>C NMR (151 MHz, CDCl<sub>3</sub>) δ ppm 202.0, 184.3, 150.1, 138.5, 128.5, 128.4, 128.3, 127.4, 126.6, 126.2, 99.1, 92.8, 29.0, 15.2. IR (neat, cm<sup>-1</sup>): 3066, 2971, 1692, 1607, 1347, 1173, 1054,

909, 843, 698; HRMS (ESI)  $m/z$ :  $[M+H]^+$  Calcd for  $C_{24}H_{21}O_2$  341.1536; Found 341.1531 (1.5 ppm).

This product was purified by flash column chromatography (silica gel, petroleum ether/ethyl acetate, 20:1).

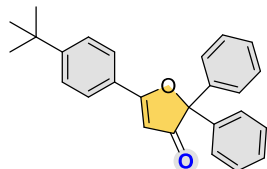

**5-(4-(tert-butyl)phenyl)-2,2-diphenylfuran-3(2H)-one (2ad):** yellow solid; melting point 181–183 °C; 70.0 mg; 95%;  $^1H$  NMR (400 MHz,  $CDCl_3$ )  $\delta$  ppm 7.91 (d,  $J = 7.2$  Hz, 2H), 7.55–7.53 (m, 6H), 7.35–7.33 (m, 6H), 6.06 (s, 1H), 1.36 (s, 9H);  $^{13}C$  NMR (151 MHz,  $CDCl_3$ )  $\delta$  ppm 202.0, 184.2, 156.9, 138.5, 128.4, 128.3, 127.2, 126.6, 126.0, 125.9, 99.2, 92.8, 35.2, 31.0. IR (neat,  $cm^{-1}$ ): 3090, 2960, 1694, 1609, 1558, 1344, 1172, 1111, 987, 697; HRMS (ESI)  $m/z$ :  $[M+H]^+$  Calcd for  $C_{26}H_{25}O_2$  369.1849; Found 369.1841 (2.2 ppm). This product was purified by flash column chromatography (silica gel, petroleum ether/ethyl acetate, 20:1).

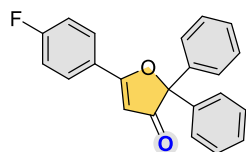

**5-(4-fluorophenyl)-2,2-diphenylfuran-3(2H)-one (2ae):** white solid; melting point 190–191 °C; 43.6 mg; 66%;  $^1H$  NMR (400 MHz,  $CDCl_3$ )  $\delta$  ppm 7.98 (dd,  $J = 7.6$  Hz 5.6 Hz, 2H), 7.52 (d,  $J = 8.0$  Hz, 4H), 7.39–7.32 (m, 6H), 7.26–7.20 (m, 2H), 6.05 (s, 1H);  $^{13}C$  NMR (151 MHz,  $CDCl_3$ )  $\delta$  ppm 201.9, 182.9, 165.5 (d,  $J = 254$  Hz, 1C), 138.3, 129.7 (d,  $J = 9$  Hz, 1C), 128.5, 126.6, 125.1 (d,  $J = 3$  Hz, 1C), 116.4, 116.3, 99.6 (d,  $J = 1$  Hz, 1C), 93.2. IR (neat,  $cm^{-1}$ ): 3057, 1652, 1598, 1324, 1069, 1055, 968, 757, 668; HRMS (ESI)  $m/z$ :  $[M+H]^+$  Calcd for  $C_{22}H_{16}FO_2$  331.1129; Found 331.1126 (0.9 ppm). This product was purified by flash column chromatography (silica gel, petroleum ether/ethyl acetate, 20:1).

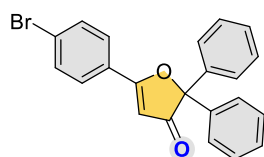

**5-(4-bromophenyl)-2,2-diphenylfuran-3(2H)-one (2af):** white solid; melting point

167–168 °C; 52.4 mg; 67%;  $^1\text{H}$  NMR (600 MHz,  $\text{CDCl}_3$ )  $\delta$  ppm 7.80 (d,  $J = 5.6$  Hz, 2H), 7.65 (d,  $J = 5.6$  Hz, 2H), 7.52–7.51 (m, 4H), 7.36–7.31 (m, 6H), 6.08 (s, 1H);  $^{13}\text{C}$  NMR (151 MHz,  $\text{CDCl}_3$ )  $\delta$  ppm 201.8, 182.8, 138.2, 132.3, 128.6, 128.5, 128.5, 127.8, 127.6, 126.6, 100.1, 93.1. IR (neat,  $\text{cm}^{-1}$ ): 3061, 1699, 1602, 1342, 1173, 1072, 986, 885, 764, 696; HRMS (ESI)  $m/z$ :  $[\text{M}+\text{H}]^+$  Calcd for  $\text{C}_{22}\text{H}_{16}\text{BrO}_2$  391.0328; Found 391.0322 (1.5 ppm). This product was purified by flash column chromatography (silica gel, petroleum ether/ethyl acetate, 20:1).

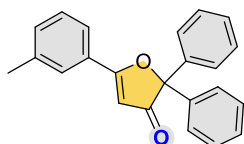

**2,2-diphenyl-5-(*m*-tolyl)furan-3(2H)-one (2ag):** yellow solid; melting point 172–173 °C; 43.1 mg; 66%;  $^1\text{H}$  NMR (600 MHz,  $\text{CDCl}_3$ )  $\delta$  ppm 7.76–7.74 (m, 2H), 7.55–7.53 (m, 4H), 7.41–7.38 (m, 2H), 7.36–7.30 (m, 6H), 6.07 (s, 1H), 2.43 (s, 3H);  $^{13}\text{C}$  NMR (151 MHz,  $\text{CDCl}_3$ )  $\delta$  ppm 202.1, 184.4, 138.8, 138.4, 133.8, 128.9, 128.7, 128.4, 128.4, 127.6, 126.7, 124.6, 99.7, 92.9, 21.4. IR (neat,  $\text{cm}^{-1}$ ): 3061, 1698, 1605, 1572, 1348, 1171, 1060, 989, 785, 698; HRMS (ESI)  $m/z$ :  $[\text{M}+\text{H}]^+$  Calcd for  $\text{C}_{23}\text{H}_{19}\text{O}_2$  327.1380; Found 327.1380 (0.0 ppm). This product was purified by flash column chromatography (silica gel, petroleum ether/ethyl acetate, 20:1).

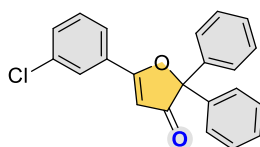

**5-(3-chlorophenyl)-2,2-diphenylfuran-3(2H)-one (2ah):** white solid; melting point 154–155 °C; 50.6 mg; 73%;  $^1\text{H}$  NMR (400 MHz,  $\text{CDCl}_3$ )  $\delta$  ppm 7.94 (d,  $J = 1.2$  Hz, 1H), 7.81 (dd,  $J = 7.6$  Hz 0.8 Hz, 1H), 7.55–7.51 (m, 5H), 7.45 (t,  $J = 8.0$  Hz, 1H), 7.38–7.31 (m, 6H), 6.10 (s, 1H);  $^{13}\text{C}$  NMR (151 MHz,  $\text{CDCl}_3$ )  $\delta$  ppm 201.9, 182.4, 138.1, 135.3, 132.8, 130.5, 130.3, 128.5, 128.5, 127.0, 126.6, 125.5, 100.6, 93.2. IR (neat,  $\text{cm}^{-1}$ ): 3093, 1698, 1606, 1563, 1349, 1174, 1058, 986, 765, 698; HRMS (ESI)  $m/z$ :  $[\text{M}+\text{H}]^+$  Calcd for  $\text{C}_{23}\text{H}_{19}\text{O}_2$  347.0833; Found 347.0832 (0.3 ppm). This product was purified by flash column chromatography (silica gel, petroleum ether/ethyl acetate, 20:1).

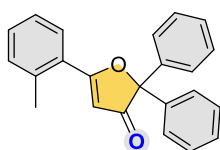

**2,2-diphenyl-5-(*o*-tolyl)furan-3(2H)-one (2ai):** white solid; melting point 134–135 °C; 56.8 mg; 87%; <sup>1</sup>H NMR (400 MHz, CDCl<sub>3</sub>) δ ppm 7.92 (d, *J* = 7.6 Hz, 1H), 7.56–7.54 (m, 4H), 7.45 (t, *J* = 7.6 Hz, 1H), 7.38–7.31 (m, 8H), 6.00 (s, 1H), 2.54 (s, 3H); <sup>13</sup>C NMR (151 MHz, CDCl<sub>3</sub>) δ ppm 202.4, 185.0, 138.4, 138.1, 132.1, 131.9, 128.7, 128.6, 128.4, 128.3, 126.6, 126.3, 103.9, 92.0, 22.0. IR (neat, cm<sup>-1</sup>): 3142, 1693, 1602, 1333, 1176, 1034, 984, 882, 770, 697; HRMS (ESI) *m/z*: [M+Na]<sup>+</sup> Calcd for C<sub>23</sub>H<sub>18</sub>NaO<sub>2</sub> 349.1199; Found 349.1193 (1.7 ppm). This product was purified by flash column chromatography (silica gel, petroleum ether/ethyl acetate, 20:1).

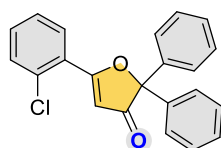

**5-(2-chlorophenyl)-2,2-diphenylfuran-3(2H)-one (2aj):** white solid; melting point 147–148 °C; 48.6 mg; 70%; <sup>1</sup>H NMR (400 MHz, CDCl<sub>3</sub>) δ ppm 8.10–8.08 (m, 1H), 7.55–7.54 (m, 5H), 7.48–7.40 (m, 2H), 7.38–7.32 (m, 6H), 6.52 (s, 1H); <sup>13</sup>C NMR (151 MHz, CDCl<sub>3</sub>) δ ppm 202.8, 180.6, 138.2, 134.2, 132.9, 131.3, 129.5, 128.5, 128.4, 127.8, 127.1, 126.6, 105.5, 91.5. IR (neat, cm<sup>-1</sup>): 3063, 1701, 1597, 1332, 1170, 1035, 985, 887, 763, 698; HRMS (ESI) *m/z*: [M+H]<sup>+</sup> Calcd for C<sub>22</sub>H<sub>16</sub>ClO<sub>2</sub> 347.0833; Found 347.0830 (0.9 ppm). This product was purified by flash column chromatography (silica gel, petroleum ether/ethyl acetate, 20:1).

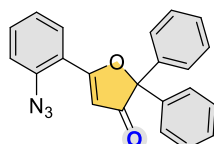

**5-(2-azidophenyl)-2,2-diphenylfuran-3(2H)-one (2ak):** yellow solid; melting point 177–178 °C; 44.5 mg; 63%; <sup>1</sup>H NMR (600 MHz, CDCl<sub>3</sub>) δ ppm 8.16 (dd, *J* = 7.8 Hz 1.2 Hz, 1H), 7.57–7.55 (m, 1H), 7.54–7.52 (m, 4H), 7.35–7.26 (m, 8H), 6.56 (s, 1H); <sup>13</sup>C NMR (151 MHz, CDCl<sub>3</sub>) δ ppm 203.0, 179.1, 140.1, 138.4, 133.4, 128.7, 128.4, 128.3, 126.6, 124.9, 120.2, 119.2, 105.0, 91.0. IR (neat, cm<sup>-1</sup>): 3062, 2927, 1697, 1602, 1341, 1270, 1169, 1039, 761, 697; HRMS (ESI) *m/z*: [M+H]<sup>+</sup> Calcd for C<sub>22</sub>H<sub>16</sub>N<sub>3</sub>O<sub>2</sub> 354.1237; Found 354.1237 (0.0 ppm). This product was purified by flash column chromatography (silica gel, petroleum ether/ethyl acetate, 20:1).

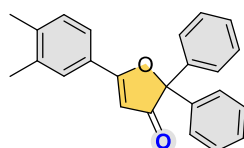

**5-(3,4-dimethylphenyl)-2,2-diphenylfuran-3(2H)-one (2al):** white solid; melting point 153–154 °C; 56.5 mg; 83%; <sup>1</sup>H NMR (600 MHz, CDCl<sub>3</sub>) δ ppm 7.72 (s, 1H), 7.69 (d, *J* = 7.2 Hz, 1H), 7.55–7.53 (m, 4H), 7.36–7.30 (m, 6H), 7.26 (d, *J* = 8.4 Hz, 1H), 6.03 (s, 1H), 2.34 (s, 6H, two singlet peaks should be observed, however, due to the limitation of the resolution of the NMR machine, a singlet peak was identified); <sup>13</sup>C NMR (151 MHz, CDCl<sub>3</sub>) δ ppm 202.0, 184.6, 142.7, 138.5, 137.4, 130.2, 128.4, 128.3, 128.1, 126.7, 126.3, 125.0, 99.0, 92.8, 20.1, 19.8. IR (neat, cm<sup>-1</sup>): 3061, 1696, 1594, 1495, 1448, 1342, 1170, 1063, 936, 698; HRMS (ESI) *m/z*: [M+Na]<sup>+</sup> Calcd for C<sub>24</sub>H<sub>20</sub>NaO<sub>2</sub> 363.1356; Found 363.1347 (2.5 ppm). This product was purified by flash column chromatography (silica gel, petroleum ether/ethyl acetate, 20:1).

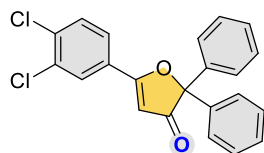

**5-(3,4-dichlorophenyl)-2,2-diphenylfuran-3(2H)-one (2am):** white solid; melting point 132–133 °C; 54.1 mg; 71%; <sup>1</sup>H NMR (400 MHz, CDCl<sub>3</sub>) δ ppm 8.04 (s, 1H), 7.75 (d, *J* = 7.6 Hz, 1H), 7.60 (d, *J* = 8.0 Hz, 1H), 7.51–7.49 (m, 4H), 7.36–7.35 (m, 6H), 6.09 (s, 1H); <sup>13</sup>C NMR (151 MHz, CDCl<sub>3</sub>) δ ppm 201.7, 181.4, 138.0, 137.3, 133.8, 131.1, 128.7, 128.6, 128.6, 128.5, 126.6, 126.3, 100.8, 93.4. IR (neat, cm<sup>-1</sup>): 3063, 2926, 1701, 1606, 1336, 1171, 1060, 986, 760, 697; HRMS (ESI) *m/z*: [M+H]<sup>+</sup> Calcd for C<sub>22</sub>H<sub>15</sub>Cl<sub>2</sub>O<sub>2</sub> 381.0444; Found 381.0440 (1.0 ppm). This product was purified by flash column chromatography (silica gel, petroleum ether/ethyl acetate, 20:1).

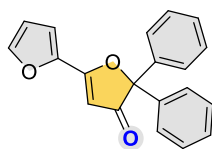

**5,5-diphenyl-[2,2'-bifuran]-4(5H)-one (2an):** white solid; melting point 171–173 °C; 32.0 mg; 53%; <sup>1</sup>H NMR (400 MHz, CDCl<sub>3</sub>) δ ppm 7.68 (s, 1H), 7.51–7.49 (m, 4H), 7.37–7.32 (m, 6H), 7.25 (d, *J* = 3.0 Hz, 1H), 6.62 (t, *J* = 2.0 Hz, 1H), 5.97 (s, 1H); <sup>13</sup>C NMR (151 MHz, CDCl<sub>3</sub>) δ ppm 201.2, 174.3, 147.1, 144.9, 138.3, 128.4, 128.4, 126.7, 115.4, 112.6, 98.7, 92.7. IR (neat, cm<sup>-1</sup>): 3059, 1698, 1623, 1351, 1169, 1068, 984, 844, 763, 697; HRMS (ESI) *m/z*: [M+H]<sup>+</sup> Calcd for C<sub>20</sub>H<sub>15</sub>O<sub>3</sub> 303.1016; Found 303.1011 (1.6 ppm). This product was purified by flash column

chromatography (silica gel, petroleum ether/ethyl acetate, 20:1).

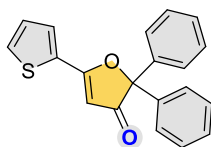

**2,2-diphenyl-5-(thiophen-2-yl)furan-3(2H)-one (2ao):** yellow solid; melting point 177–179 °C; 45.8 mg; 72%;  $^1\text{H}$  NMR (400 MHz,  $\text{CDCl}_3$ )  $\delta$  ppm 7.79 (d,  $J = 2.4$  Hz, 1H), 7.67–7.66 (m, 1H), 7.54–7.52 (m, 4H), 7.37–7.31 (m, 6H), 7.20 (dd,  $J = 4.8$  Hz 4.0 Hz, 1H), 5.93 (s, 1H);  $^{13}\text{C}$  NMR (151 MHz,  $\text{CDCl}_3$ )  $\delta$  ppm 201.1, 178.4, 138.3, 132.2, 131.8, 130.9, 128.6, 128.4, 128.4, 126.7, 98.7, 93.1. IR (neat,  $\text{cm}^{-1}$ ): 3092, 1694, 1583, 1377, 1168, 1025, 982, 835, 763, 698; HRMS (ESI)  $m/z$ :  $[\text{M}+\text{H}]^+$  Calcd for  $\text{C}_{20}\text{H}_{15}\text{O}_2\text{S}$  319.0787; Found 319.0782 (1.6 ppm). This product was purified by flash column chromatography (silica gel, petroleum ether/ethyl acetate, 20:1).

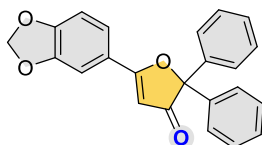

**5-(benzo[d][1,3]dioxol-5-yl)-2,2-diphenylfuran-3(2H)-one (2ap):** yellow solid; melting point 214–216 °C; 44.9 mg; 63%;  $^1\text{H}$  NMR (400 MHz,  $\text{CDCl}_3$ )  $\delta$  ppm 7.56–7.51 (m, 5H), 7.38–7.33 (m, 7H), 6.92 (d,  $J = 8.4$  Hz, 1H), 6.06 (s, 2H), 5.95 (s, 1H);  $^{13}\text{C}$  NMR (151 MHz,  $\text{CDCl}_3$ )  $\delta$  ppm 201.6, 183.5, 151.7, 148.3, 138.5, 128.4, 128.3, 126.6, 123.1, 122.7, 108.8, 107.0, 102.0, 98.6, 92.9. IR (neat,  $\text{cm}^{-1}$ ): 3061, 2919, 1690, 1574, 1448, 1318, 1036, 923, 759, 694; HRMS (ESI)  $m/z$ :  $[\text{M}+\text{H}]^+$  Calcd for  $\text{C}_{23}\text{H}_{17}\text{O}_4$  357.1121; Found 357.1122 (0.3 ppm). This product was purified by flash column chromatography (silica gel, petroleum ether/ethyl acetate, 20:1).

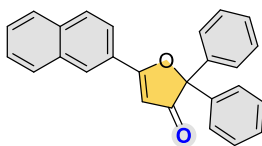

**5-(naphthalen-2-yl)-2,2-diphenylfuran-3(2H)-one (2aq):** yellow solid; melting point 160–162 °C; 60.9 mg; 84%;  $^1\text{H}$  NMR (400 MHz,  $\text{CDCl}_3$ )  $\delta$  ppm 8.56 (s, 1H), 7.99–7.88 (m, 4H), 7.63–7.58 (m, 6H), 7.39–7.32 (m, 6H), 6.21 (s, 1H);  $^{13}\text{C}$  NMR (151 MHz,  $\text{CDCl}_3$ )  $\delta$  ppm 202.1, 184.0, 138.5, 135.4, 132.7, 129.3, 128.8, 128.5, 128.5, 128.4, 127.9, 127.8, 127.2, 126.7, 125.9, 123.4, 100.2, 93.0. IR (neat,  $\text{cm}^{-1}$ ): 3060, 1696, 1604, 1582, 1369, 1172, 1053, 988, 758, 699; HRMS (ESI)  $m/z$ :  $[\text{M}+\text{Na}]^+$  Calcd for  $\text{C}_{26}\text{H}_{18}\text{NaO}_2$  385.1199; Found 385.1192 (1.8 ppm). This



product was purified by flash column chromatography (silica gel, petroleum ether/ethyl acetate, 20:1).

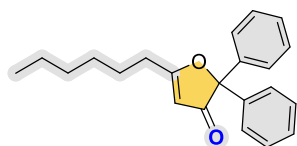

**5-pentyl-2,2-diphenylfuran-3(2H)-one (2ar):** yellow oil; 17.3 mg; 27%;  $^1\text{H}$  NMR (400 MHz,  $\text{CDCl}_3$ )  $\delta$  ppm 7.46–7.44 (m, 4H), 7.36–7.29 (m, 6H), 5.49 (m, 1H), 2.63 (t,  $J = 7.6$  Hz, 2H), 1.78–1.71 (m, 2H), 1.41–1.36 (m, 2H), 1.31–1.30 (m, 4H), 0.88 (t,  $J = 6.8$  Hz, 3H);  $^{13}\text{C}$  NMR (151 MHz,  $\text{CDCl}_3$ )  $\delta$  ppm 202.6, 192.9, 138.4, 128.4, 128.3, 126.5, 102.4, 92.5, 31.4, 30.9, 28.8, 26.1, 22.4, 14.0. IR (neat,  $\text{cm}^{-1}$ ): 3062, 2929, 1704, 1601, 1449, 1369, 1170, 762, 697, 602; HRMS (ESI)  $m/z$ :  $[\text{M}+\text{H}]^+$  Calcd for  $\text{C}_{22}\text{H}_{25}\text{O}_2$  321.1849; Found 321.1843 (1.9 ppm). This product was purified by flash column chromatography (silica gel, petroleum ether/ethyl acetate, 20:1).

#### Characterization Data of 2ba–2br

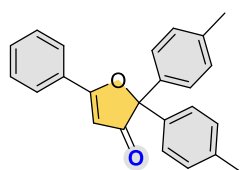

**5-phenyl-2,2-di-p-tolylfuran-3(2H)-one (2ba):** yellow oil; 46.3 mg; 68%;  $^1\text{H}$  NMR (400 MHz,  $\text{CDCl}_3$ )  $\delta$  ppm 7.94 (d,  $J = 7.6$  Hz, 2H), 7.55 (t,  $J = 7.2$  Hz, 1H), 7.49 (t,  $J = 7.6$  Hz, 2H), 7.42–7.40 (m, 4H), 7.16–7.14 (m, 4H), 6.07 (s, 1H), 2.32 (s, 6H);  $^{13}\text{C}$  NMR (151 MHz,  $\text{CDCl}_3$ )  $\delta$  ppm 202.5, 184.0, 138.2, 135.6, 132.8, 129.1, 128.9, 128.8, 127.2, 126.6, 99.7, 93.1, 21.1. IR (neat,  $\text{cm}^{-1}$ ): 3029, 1698, 1606, 1352, 1169, 1054, 987, 886, 767, 689; HRMS (ESI)  $m/z$ :  $[\text{M}+\text{Na}]^+$  Calcd for  $\text{C}_{24}\text{H}_{20}\text{NaO}_2$  363.1356; Found 363.1354 (0.6 ppm). This product was purified by flash column chromatography (silica gel, petroleum ether/ethyl acetate, 20:1).

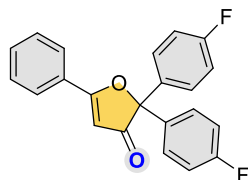

**2,2-bis(4-fluorophenyl)-5-phenylfuran-3(2H)-one (2bb):** white solid; melting point 137–138 °C; 64.8 mg; 93%;  $^1\text{H}$  NMR (400 MHz,  $\text{CDCl}_3$ )  $\delta$  ppm 7.96–7.94 (m, 2H), 7.61 (t,  $J = 7.6$  Hz, 1H), 7.55–7.47 (m, 6H), 7.07–7.02 (m, 4H), 6.10 (s, 1H);  $^{13}\text{C}$  NMR (151 MHz,  $\text{CDCl}_3$ )  $\delta$  ppm

201.8, 184.2, 162.7 (d,  $J^1 = 249.2$  Hz), 134.1 (d,  $J^4 = 3.0$  Hz), 133.2, 129.1, 128.5 (d,  $J^3 = 9.1$  Hz), 128.4, 127.3, 115.5 (d,  $J^2 = 21.1$  Hz), 99.7, 91.9;  $^{19}\text{F}$  NMR (376 MHz,  $\text{CDCl}_3$ )  $\delta$  ppm -113.47--113.54 (m, 2F). IR (neat,  $\text{cm}^{-1}$ ): 3070, 1698, 1605, 1352, 1185, 1054, 989, 887, 769, 688; HRMS (ESI)  $m/z$ :  $[\text{M}+\text{Na}]^+$  Calcd for  $\text{C}_{22}\text{H}_{14}\text{F}_2\text{NaO}_2$  371.0854; Found 371.0847 (1.9 ppm). This product was purified by flash column chromatography (silica gel, petroleum ether/ethyl acetate, 20:1).

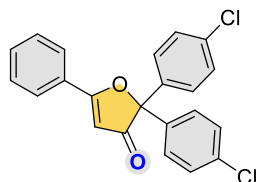

**2,2-bis(4-chlorophenyl)-5-phenylfuran-3(2H)-one (2bc):** yellow solid; melting point 141–142 °C; 63.3 mg; 83%;  $^1\text{H}$  NMR (400 MHz,  $\text{CDCl}_3$ )  $\delta$  ppm 7.94 (d,  $J = 7.2$  Hz, 2H), 7.61 (t,  $J = 7.6$  Hz, 1H), 7.55–7.51 (m, 2H), 7.47–7.45 (m, 4H), 7.34–7.32 (m, 4H), 6.10 (s, 1H);  $^{13}\text{C}$  NMR (151 MHz,  $\text{CDCl}_3$ )  $\delta$  ppm 201.1, 184.3, 136.5, 134.7, 133.3, 129.1, 128.7, 128.3, 127.9, 127.2, 99.7, 91.5. IR (neat,  $\text{cm}^{-1}$ ): 3066, 1699, 1605, 1352, 1165, 1054, 988, 834, 769, 688; HRMS (ESI)  $m/z$ :  $[\text{M}+\text{Na}]^+$  Calcd for  $\text{C}_{22}\text{H}_{14}\text{Cl}_2\text{NaO}_2$  403.0263; Found 403.0266 (0.7 ppm). This product was purified by flash column chromatography (silica gel, petroleum ether/ethyl acetate, 20:1).

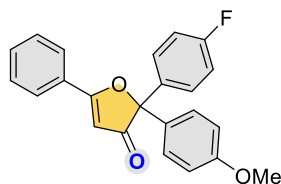

**2-(4-fluorophenyl)-2-(4-methoxyphenyl)-5-phenylfuran-3(2H)-one (2bd):** yellow oil; 40.4 mg; 56%;  $^1\text{H}$  NMR (600 MHz,  $\text{CDCl}_3$ )  $\delta$  ppm 7.94 (d,  $J = 7.8$  Hz, 2H), 7.59 (t,  $J = 8.4$  Hz, 1H), 7.53–7.49 (m, 4H), 7.41 (d,  $J = 8.4$  Hz, 2H), 7.03 (t,  $J = 9.0$  Hz, 2H), 6.88 (d,  $J = 8.4$  Hz, 2H), 6.09 (s, 1H), 3.78 (s, 3H);  $^{13}\text{C}$  NMR (151 MHz,  $\text{CDCl}_3$ )  $\delta$  ppm 202.3, 184.1, 162.7 (d,  $J^1 = 247.6$  Hz), 159.7, 134.4 (d,  $J^4 = 3.0$  Hz), 133.0, 130.4, 129.0, 128.7, 128.5 (d,  $J^3 = 7.6$  Hz), 128.2, 127.3, 115.3 (d,  $J^2 = 21.1$  Hz), 113.9, 99.7, 92.5, 55.3;  $^{19}\text{F}$  NMR (376 MHz,  $\text{CDCl}_3$ )  $\delta$  ppm -118.70--118.75 (m, 1F). IR (neat,  $\text{cm}^{-1}$ ): 3045, 1697, 1605, 1352, 1249, 1169, 887, 831, 768, 688; HRMS (ESI)  $m/z$ :  $[\text{M}+\text{H}]^+$  Calcd for  $\text{C}_{23}\text{H}_{18}\text{FO}_3$  361.1234; Found 361.1228 (1.7 ppm). This product was purified by flash column chromatography (silica gel, petroleum ether/ethyl acetate, 20:1).

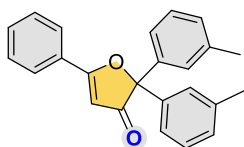

**5-phenyl-2,2-di-m-tolylfuran-3(2H)-one (2be):** yellow oil; 32.7 mg; 48%;  $^1\text{H}$  NMR (400 MHz,  $\text{CDCl}_3$ )  $\delta$  ppm 7.96 (d,  $J = 4.8$  Hz, 2H), 7.60–7.57 (m, 1H), 7.52 (t,  $J = 5.2$  Hz, 2H), 7.33–7.32 (m, 4H), 7.25–7.22 (m, 2H), 7.13 (d,  $J = 4.8$  Hz, 2H), 6.08 (s, 1H), 2.33 (s, 6H);  $^{13}\text{C}$  NMR (151 MHz,  $\text{CDCl}_3$ )  $\delta$  ppm 202.3, 184.1, 138.4, 138.1, 132.9, 129.2, 129.0, 128.8, 128.3, 127.3, 127.2, 123.8, 99.8, 93.2, 21.6. IR (neat,  $\text{cm}^{-1}$ ): 3058, 1698, 1606, 1351, 1288, 1152, 1056, 887, 767, 692; HRMS (ESI)  $m/z$ :  $[\text{M}+\text{H}]^+$  Calcd for  $\text{C}_{24}\text{H}_{21}\text{O}_2$  341.1536; Found 341.1530 (1.8 ppm). This product was purified by flash column chromatography (silica gel, petroleum ether/ethyl acetate, 20:1).

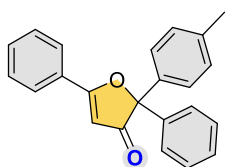

**2,5-diphenyl-2-(p-tolyl)furan-3(2H)-one (2bf):** colorless oil; 32.6 mg; 50%;  $^1\text{H}$  NMR (600 MHz,  $\text{CDCl}_3$ )  $\delta$  ppm 7.95 (d,  $J = 7.8$  Hz, 2H), 7.58–7.49 (m, 5H), 7.41 (d,  $J = 8.4$  Hz, 2H), 7.35–7.30 (m, 3H), 7.16 (d,  $J = 7.8$  Hz, 2H), 6.08 (s, 1H), 2.32 (s, 3H);  $^{13}\text{C}$  NMR (151 MHz,  $\text{CDCl}_3$ )  $\delta$  ppm 202.3, 184.1, 138.5, 138.3, 135.5, 132.9, 129.1, 128.9, 128.8, 128.4, 128.3, 127.2, 126.7, 126.6, 99.8, 93.0, 21.1. IR (neat,  $\text{cm}^{-1}$ ): 3060, 2919, 1697, 1606, 1352, 1171, 1054, 985, 768, 691; HRMS (ESI)  $m/z$ :  $[\text{M}+\text{H}]^+$  Calcd for  $\text{C}_{23}\text{H}_{19}\text{O}_2$  327.1380; Found 327.1375 (1.5 ppm). This product was purified by flash column chromatography (silica gel, petroleum ether/ethyl acetate, 20:1).

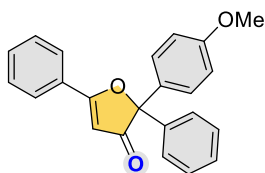

**2-(4-methoxyphenyl)-2,5-diphenylfuran-3(2H)-one (2bg):** yellow oil; 60.3 mg; 88%;  $^1\text{H}$  NMR (600 MHz,  $\text{CDCl}_3$ )  $\delta$  ppm 7.96–7.94 (m, 2H), 7.59–7.57 (m, 1H), 7.53–7.50 (m, 4H), 7.43 (d,  $J = 9.0$  Hz, 2H), 7.36–7.30 (m, 3H), 6.88 (d,  $J = 9.0$  Hz, 2H), 6.09 (s, 1H), 3.78 (s, 3H);  $^{13}\text{C}$  NMR (151 MHz,  $\text{CDCl}_3$ )  $\delta$  ppm 202.5, 184.1, 159.7, 138.5, 132.9, 130.6, 129.0, 128.8, 128.4, 128.3, 128.3, 127.3, 126.5, 113.8, 99.7, 93.0, 55.3. IR (neat,  $\text{cm}^{-1}$ ): 3063, 2928, 1696, 1607, 1510, 1352, 1172, 885, 767, 691; HRMS (ESI)  $m/z$ :  $[\text{M}+\text{Na}]^+$  Calcd for  $\text{C}_{23}\text{H}_{18}\text{NaO}_3$  365.1148; Found 365.1139 (2.5

ppm). This product was purified by flash column chromatography (silica gel, petroleum ether/ethyl acetate, 20:1).

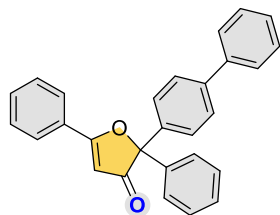

**2-([1,1'-biphenyl]-4-yl)-2,5-diphenylfuran-3(2H)-one (2bh):** colorless oil; 56.7 mg; 73%;  $^1\text{H}$  NMR (400 MHz,  $\text{CDCl}_3$ )  $\delta$  ppm 7.96 (d,  $J = 6.8$  Hz, 2H), 7.63–7.48 (m, 11H), 7.42–7.32 (m, 6H), 6.11 (s, 1H);  $^{13}\text{C}$  NMR (151 MHz,  $\text{CDCl}_3$ )  $\delta$  ppm 202.0, 184.2, 141.3, 140.4, 138.3, 137.4, 133.0, 129.0, 128.7, 128.7, 128.5, 128.4, 127.4, 127.3, 127.2, 127.1, 127.1, 126.6, 99.8, 92.8. IR (neat,  $\text{cm}^{-1}$ ): 3061, 1697, 1606, 1489, 1352, 1172, 1054, 986, 767, 654; HRMS (ESI)  $m/z$ :  $[\text{M}+\text{Na}]^+$  Calcd for  $\text{C}_{28}\text{H}_{20}\text{NaO}_2$  411.1356; Found 411.1348 (1.9 ppm). This product was purified by flash column chromatography (silica gel, petroleum ether/ethyl acetate, 20:1).

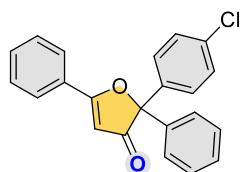

**2-(4-chlorophenyl)-2,5-diphenylfuran-3(2H)-one (2bi):** yellow oil; 57.6 mg; 83%;  $^1\text{H}$  NMR (400 MHz,  $\text{CDCl}_3$ )  $\delta$  ppm 7.95 (d,  $J = 7.2$  Hz, 2H), 7.60 (t,  $J = 7.2$  Hz, 1H), 7.55–7.48 (m, 6H), 7.35–7.31 (m, 5H), 6.10 (s, 1H);  $^{13}\text{C}$  NMR (151 MHz,  $\text{CDCl}_3$ )  $\delta$  ppm 201.6, 184.2, 138.0, 136.9, 134.5, 133.1, 129.0, 128.6, 128.6, 128.5, 128.5, 128.0, 127.2, 126.5, 99.7, 92.2. IR (neat,  $\text{cm}^{-1}$ ): 3062, 1698, 1606, 1351, 1172, 1054, 987, 886, 769, 691; HRMS (ESI)  $m/z$ :  $[\text{M}+\text{H}]^+$  Calcd for  $\text{C}_{22}\text{H}_{16}\text{ClO}_2$  347.0833; Found 347.0833 (0.0 ppm). This product was purified by flash column chromatography (silica gel, petroleum ether/ethyl acetate, 20:1).

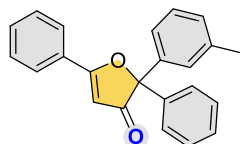

**2,5-diphenyl-2-(m-tolyl)furan-3(2H)-one (2bj):** yellow oil; 50.3 mg; 77%;  $^1\text{H}$  NMR (400 MHz,  $\text{CDCl}_3$ )  $\delta$  ppm 7.96 (d,  $J = 7.2$  Hz, 2H), 7.60–7.50 (m, 5H), 7.37–7.30 (m, 5H), 7.24 (t,  $J = 8.0$  Hz, 1H), 7.13 (d,  $J = 7.6$  Hz, 1H), 6.09 (s, 1H), 2.32 (s, 3H);  $^{13}\text{C}$  NMR (151 MHz,  $\text{CDCl}_3$ )  $\delta$  ppm 202.2,

184.1, 138.4, 138.3, 138.1, 132.9, 129.2, 129.0, 128.8, 128.4, 128.3, 128.3, 127.3, 127.2, 126.6, 123.8, 99.8, 93.0, 21.5. IR (neat,  $\text{cm}^{-1}$ ): 3061, 1697, 1606, 1352, 1171, 1054, 985, 885, 768, 691. HRMS (ESI)  $m/z$ :  $[\text{M}+\text{H}]^+$  Calcd for  $\text{C}_{23}\text{H}_{19}\text{O}_2$  327.1380; Found 327.1375 (1.5 ppm). This product was purified by flash column chromatography (silica gel, petroleum ether/ethyl acetate, 20:1).

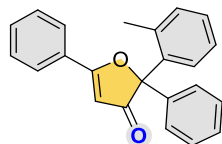

**2,5-diphenyl-2-(*o*-tolyl)furan-3(2H)-one (2bk):** yellow solid; melting point 171–172 °C; 55.5 mg; 85%;  $^1\text{H}$  NMR (400 MHz,  $\text{CDCl}_3$ )  $\delta$  ppm 7.94 (d,  $J = 7.6$  Hz, 2H), 7.70–7.68 (m, 1H), 7.58 (t,  $J = 7.6$  Hz, 1H), 7.53–7.50 (m, 2H), 7.31–7.26 (m, 6H), 7.24–7.20 (m, 2H), 6.09 (s, 1H), 2.23 (s, 3H);  $^{13}\text{C}$  NMR (151 MHz,  $\text{CDCl}_3$ )  $\delta$  ppm 202.0, 183.7, 139.1, 138.2, 135.1, 132.9, 132.5, 129.0, 128.9, 128.7, 128.5, 127.9, 127.2, 125.5, 125.3, 99.6, 94.6, 21.2. IR (neat,  $\text{cm}^{-1}$ ): 3061, 1697, 1607, 1352, 1174, 1055, 983, 885, 764, 690; HRMS (ESI)  $m/z$ :  $[\text{M}+\text{H}]^+$  Calcd for  $\text{C}_{23}\text{H}_{19}\text{O}_2$  327.1380; Found 327.1383 (0.9 ppm). This product was purified by flash column chromatography (silica gel, petroleum ether/ethyl acetate, 20:1).

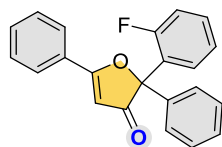

**2-(2-fluorophenyl)-2,5-diphenylfuran-3(2H)-one (2bl):** yellow solid; melting point 183–184 °C; 50.2 mg; 76%;  $^1\text{H}$  NMR (600 MHz,  $\text{CDCl}_3$ )  $\delta$  ppm 7.95 (d,  $J = 7.2$  Hz, 2H), 7.58–7.55 (m, 3H), 7.50 (t,  $J = 5.2$  Hz, 2H), 7.38–7.33 (m, 5H), 7.12–7.09 (m, 1H), 7.08–7.04 (m, 1H), 6.10 (s, 1H);  $^{13}\text{C}$  NMR (151 MHz,  $\text{CDCl}_3$ )  $\delta$  ppm 201.6, 183.9, 161.60 (d,  $J^1 = 252.2$  Hz), 136.8, 132.9, 131.0 (d,  $J^3 = 7.6$  Hz), 130.1 (d,  $J^3 = 3.0$  Hz), 128.9, 128.7, 128.4, 128.4, 127.3, 125.7, 125.7 (d,  $J^2 = 12.1$  Hz), 123.7 (d,  $J^4 = 3.0$  Hz), 116.5 (d,  $J^2 = 21.1$  Hz), 99.5 (d,  $J^3 = 1.5$  Hz), 90.8;  $^{19}\text{F}$  NMR (376 MHz,  $\text{CDCl}_3$ )  $\delta$  ppm -113.97--114.03 (m, 1F). IR (neat,  $\text{cm}^{-1}$ ): 3087, 1697, 1606, 1349, 1278, 1173, 1052, 990, 759, 684; HRMS (ESI)  $m/z$ :  $[\text{M}+\text{H}]^+$  Calcd for  $\text{C}_{22}\text{H}_{16}\text{FO}_2$  331.1129; Found 331.1129 (0.0 ppm). This product was purified by flash column chromatography (silica gel, petroleum ether/ethyl acetate, 20:1).

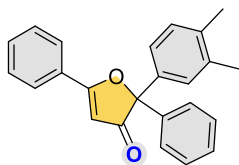

**2-(3,4-dimethylphenyl)-2,5-diphenylfuran-3(2H)-one (2bm):** yellow solid; melting point 167–168 °C; 45.6 mg; 67%;  $^1\text{H}$  NMR (400 MHz,  $\text{CDCl}_3$ )  $\delta$  ppm 7.95 (d,  $J = 7.2$  Hz, 2H), 7.55–7.48 (m, 5H), 7.34–7.24 (m, 5H), 7.11 (d,  $J = 2.9$  Hz, 1H), 6.08 (s, 1H), 2.22 (s, 6H, two singlet peaks should be observed, however, due to the limitation of the resolution of the NMR machine, a singlet peak was identified);  $^{13}\text{C}$  NMR (151 MHz,  $\text{CDCl}_3$ )  $\delta$  ppm 202.3, 184.0, 138.5, 137.0, 136.7, 135.9, 132.8, 129.6, 128.9, 128.8, 128.3, 128.2, 127.9, 127.2, 126.5, 124.3, 99.7, 93.1, 19.9, 19.4. IR (neat,  $\text{cm}^{-1}$ ): 3061, 1697, 1606, 1351, 1184, 1054, 1026, 888, 767, 692; HRMS (ESI)  $m/z$ :  $[\text{M}+\text{H}]^+$  Calcd for  $\text{C}_{24}\text{H}_{21}\text{O}_2$  341.1536; Found 341.1531 (1.5 ppm). This product was purified by flash column chromatography (silica gel, petroleum ether/ethyl acetate, 20:1).

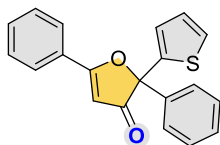

**2,5-diphenyl-2-(thiophen-2-yl)furan-3(2H)-one (2bn):** red solid; melting point 160–161 °C; 26.1 mg; 41%;  $^1\text{H}$  NMR (400 MHz,  $\text{CDCl}_3$ )  $\delta$  ppm 7.95 (d,  $J = 7.6$  Hz, 2H), 7.61–7.57 (m, 3H), 7.54–7.50 (m, 2H), 7.38–7.32 (m, 4H), 7.23 (d,  $J = 3.2$  Hz, 1H), 7.01–6.99 (m, 1H), 6.09 (s, 1H);  $^{13}\text{C}$  NMR (151 MHz,  $\text{CDCl}_3$ )  $\delta$  ppm 200.8, 184.1, 141.3, 137.8, 133.1, 129.0, 128.7, 128.6, 128.4, 127.3, 126.9, 126.7, 126.6, 125.8, 99.0, 90.5. IR (neat,  $\text{cm}^{-1}$ ): 3064, 1701, 1604, 1588, 1491, 1349, 1157, 1051, 768, 694; HRMS (ESI)  $m/z$ :  $[\text{M}+\text{H}]^+$  Calcd for  $\text{C}_{20}\text{H}_{15}\text{O}_2\text{S}$  319.0787; Found 319.0783 (1.3 ppm). This product was purified by flash column chromatography (silica gel, petroleum ether/ethyl acetate, 20:1).

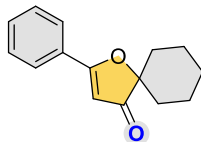

**2-phenyl-1-oxaspiro[4.5]dec-2-en-4-one (2bo):** colorless oil; 38.8 mg; 85%;  $^1\text{H}$  NMR (400 MHz,  $\text{CDCl}_3$ )  $\delta$  ppm 7.87–7.85 (m, 2H), 7.58–7.54 (m, 1H), 7.51–7.47 (m, 2H), 5.98 (s, 1H), 1.83–1.78 (m, 4H), 1.75–1.69 (m, 5H), 1.42–1.37 (m, 1H);  $^{13}\text{C}$  NMR (151 MHz,  $\text{CDCl}_3$ )  $\delta$  ppm 206.9, 183.4, 132.4, 129.3, 128.8, 127.1, 99.2, 90.7, 31.9, 24.5, 21.9. IR (neat,  $\text{cm}^{-1}$ ): 3061, 1693,

1606, 1567, 1449, 1363, 1258, 886, 771, 690; HRMS (ESI)  $m/z$ :  $[M+H]^+$  Calcd for  $C_{15}H_{17}O_2$  229.1223; Found 229.1223 (0.0 ppm). This product was purified by flash column chromatography (silica gel, petroleum ether/ethyl acetate, 20:1).

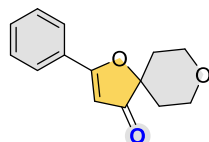

**2-phenyl-1,8-dioxaspiro[4.5]dec-2-en-4-one (2bp)**: white solid; melting point 147–148 °C; 41.9 mg; 91%;  $^1H$  NMR (400 MHz,  $CDCl_3$ )  $\delta$  ppm 7.88–7.86 (m, 2H), 7.61–7.57 (m, 1H), 7.52 (t,  $J = 7.6$  Hz, 2H), 6.03 (s, 1H), 4.09–4.05 (m, 2H), 3.91–3.85 (m, 2H), 2.17–2.10 (m, 2H), 1.62 (dd,  $J = 14$  Hz 1.6 Hz, 2H);  $^{13}C$  NMR (151 MHz,  $CDCl_3$ )  $\delta$  ppm 204.8, 183.4, 132.8, 128.9, 128.9, 127.1, 99.5, 87.2, 63.8, 32.0. IR (neat,  $cm^{-1}$ ): 3067, 1684, 1563, 1452, 1368, 1256, 1074, 1021, 886, 690; HRMS (ESI)  $m/z$ :  $[M+H]^+$  Calcd for  $C_{14}H_{15}O_3$  231.1016; Found 231.1012 (1.7 ppm). This product was purified by flash column chromatography (silica gel, petroleum ether/ethyl acetate, 20:1).

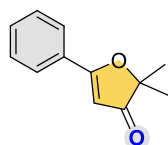

**2,2-dimethyl-5-phenylfuran-3(2H)-one (2bq)**: yellow solid; melting point 70–72 °C; 35.8 mg; 95%;  $^1H$  NMR (600 MHz,  $CDCl_3$ )  $\delta$  ppm 7.84 (d,  $J = 7.8$  Hz, 2H), 7.56 (d,  $J = 7.8$  Hz, 1H), 7.49 (d,  $J = 7.8$  Hz, 2H), 5.97 (s, 1H), 1.50 (s, 6H);  $^{13}C$  NMR (151 MHz,  $CDCl_3$ )  $\delta$  ppm 206.9, 183.4, 132.5, 129.2, 128.8, 127.1, 98.5, 88.9, 23.1. IR (neat,  $cm^{-1}$ ): 3063, 1696, 1600, 1360, 1172, 1050, 954, 855, 774, 690; HRMS (ESI)  $m/z$ :  $[M+H]^+$  Calcd for  $C_{12}H_{13}O_2$  189.0910; Found 189.0910 (0.0 ppm). This product was purified by flash column chromatography (silica gel, petroleum ether/ethyl acetate, 20:1).

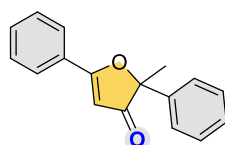

**2-methyl-2,5-diphenylfuran-3(2H)-one (2br)**: colorless oil; 45.6 mg; 91%;  $^1H$  NMR (400 MHz,  $CDCl_3$ )  $\delta$  ppm 7.93 (d,  $J = 8.0$  Hz, 2H), 7.60–7.50 (m, 5H), 7.38–7.28 (m, 3H), 6.00 (s, 1H), 1.86 (s, 3H);  $^{13}C$  NMR (151 MHz,  $CDCl_3$ )  $\delta$  ppm 204.2, 183.8, 138.4, 132.8, 128.9, 128.8, 128.5, 128.0,

127.1, 124.5, 98.7, 90.3, 24.4. IR (neat,  $\text{cm}^{-1}$ ): 3062, 1697, 1602, 1567, 1355, 1124, 1049, 862, 772, 692; HRMS (ESI)  $m/z$ :  $[\text{M}+\text{H}]^+$  Calcd for  $\text{C}_{17}\text{H}_{15}\text{O}_2$  251.1067; Found 251.1063 (1.6 ppm). This product was purified by flash column chromatography (silica gel, petroleum ether/ethyl acetate, 20:1).

#### Characterization Data of 3ab

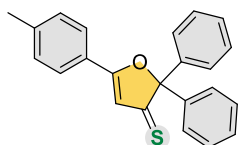

**2,2-diphenyl-5-(p-tolyl)furan-3(2H)-thione (3ab)**: yellow solid; melting point 178–195 °C; 55.5 mg; 81%;  $^1\text{H}$  NMR (400 MHz,  $\text{CDCl}_3$ )  $\delta$  ppm 7.87 (d,  $J$  = 8.0 Hz, 2H), 7.53–7.50 (m, 4H), 7.33–7.29 (m, 8H), 6.89 (s, 1H), 2.41 (s, 3H);  $^{13}\text{C}$  NMR (151 MHz,  $\text{CDCl}_3$ )  $\delta$  ppm 229.9, 182.4, 144.7, 139.5, 130.0, 128.4, 128.1, 127.9, 127.6, 125.1, 118.4, 105.8, 21.9. IR (neat,  $\text{cm}^{-1}$ ): 1610, 1556, 1498, 1376, 1316, 1180, 1062, 809, 763, 701; HRMS (ESI)  $m/z$ :  $[\text{M}+\text{H}]^+$  Calcd for  $\text{C}_{23}\text{H}_{19}\text{OS}$  343.1151; Found 343.1151 (0.0 ppm). This product was purified by flash column chromatography (silica gel, petroleum ether/ethyl acetate, 20:1).

#### Characterization Data of 3ad

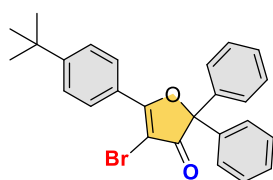

**4-bromo-5-(4-(tert-butyl)phenyl)-2,2-diphenylfuran-3(2H)-one (3ad)**: white solid; melting point 194–195 °C; 82.3 mg; 92%;  $^1\text{H}$  NMR (400 MHz,  $\text{CDCl}_3$ )  $\delta$  ppm 8.32 (d,  $J$  = 8.4 Hz, 2H), 7.58 (d,  $J$  = 8.8 Hz, 2H), 7.55–7.53 (m, 4H), 7.37–7.30 (m, 6H), 1.37 (s, 9H);  $^{13}\text{C}$  NMR (151 MHz,  $\text{CDCl}_3$ )  $\delta$  ppm 196.5, 177.5, 157.1, 137.8, 128.6, 128.5, 128.5, 126.5, 125.8, 125.6, 93.9, 91.1, 35.3, 31.0. IR (neat,  $\text{cm}^{-1}$ ): 1714, 1606, 1577, 1498, 1187, 1078, 910, 844, 765, 696; HRMS (ESI)  $m/z$ :  $[\text{M}+\text{H}]^+$  Calcd for  $\text{C}_{26}\text{H}_{24}\text{BrO}_2$  447.0954; Found 447.0957 (0.7 ppm). This product was purified by flash column chromatography (silica gel, petroleum ether/ethyl acetate, 20:1).

#### Characterization Data of 4ab

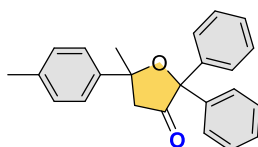



**5-methyl-2,2-diphenyl-5-(p-tolyl)dihydrofuran-3(2H)-one (4ab):** yellow oil; 34.9 mg; 51%; <sup>1</sup>H NMR (400 MHz, CDCl<sub>3</sub>) δ ppm 7.72 (d, *J* = 7.6 Hz, 2H), 7.42–7.39 (m, 4H), 7.35 (t, *J* = 7.6 Hz, 2H), 7.28 (d, *J* = 7.2 Hz, 1H), 7.25–7.19 (m, 3H), 7.16 (d, *J* = 8.0 Hz, 2H), 3.08 (d, *J* = 17.6 Hz, 1H), 2.93 (d, *J* = 17.6 Hz, 1H), 2.34 (s, 3H), 1.53 (s, 3H); <sup>13</sup>C NMR (151 MHz, CDCl<sub>3</sub>) δ ppm 212.3, 143.6, 142.4, 142.0, 136.8, 129.0, 128.2, 128.1, 127.5, 127.4, 126.2, 126.2, 124.7, 86.7, 80.9, 49.7, 31.6, 21.0. IR (neat, cm<sup>-1</sup>): 1753, 1491, 1447, 1159, 1046, 1026, 818, 754, 699, 608; HRMS (ESI) *m/z*: [M+H]<sup>+</sup> Calcd for C<sub>24</sub>H<sub>23</sub>O<sub>2</sub> 343.1693; Found 343.1692 (0.3 ppm). This product was purified by flash column chromatography (silica gel, petroleum ether/ethyl acetate, 20:1).

#### Characterization Data of 5aa

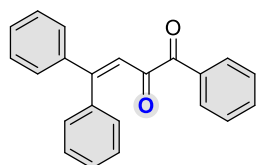

**1,4,4-triphenylbut-3-ene-1,2-dione (5aa):** yellow solid; melting point 97–98 °C; 39.4 mg; 63%; <sup>1</sup>H NMR (400 MHz, CDCl<sub>3</sub>) δ ppm 7.72 (d, *J* = 7.2 Hz, 2H), 7.54 (t, *J* = 7.6 Hz, 1H), 7.44–7.34 (m, 7H), 7.19–7.16 (m, 1H), 7.11–7.05 (m, 4H), 6.93 (s, 1H); <sup>13</sup>C NMR (151 MHz, CDCl<sub>3</sub>) δ ppm 194.1, 191.9, 160.1, 139.7, 137.8, 133.8, 132.7, 130.5, 130.4, 129.7, 129.2, 128.8, 128.5, 128.2, 128.0, 123.4. IR (neat, cm<sup>-1</sup>): 2920, 2850, 1675, 1639, 1444, 1172, 959, 745, 697; HRMS (ESI) *m/z*: [M+H]<sup>+</sup> Calcd for C<sub>22</sub>H<sub>17</sub>O<sub>2</sub> 313.1223; Found 313.1223 (0.0 ppm). This product was purified by flash column chromatography (silica gel, petroleum ether/ethyl acetate, 50:1).

#### Characterization Data of 1ab-OMe

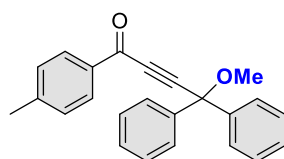

**4-methoxy-4,4-diphenyl-1-(p-tolyl)but-2-yn-1-one (1ab-OMe):** yellow oil; <sup>1</sup>H NMR (400 MHz, CDCl<sub>3</sub>) δ ppm 8.02 (d, *J* = 8.0 Hz, 2H), 7.59–7.57 (m, 4H), 7.37–7.33 (m, 4H), 7.31–7.26 (m, 4H), 3.44 (s, 3H), 2.41 (s, 3H); <sup>13</sup>C NMR (151 MHz, CDCl<sub>3</sub>) δ ppm 177.0, 145.5, 141.9, 134.4, 129.6, 129.4, 128.4, 128.1, 126.7, 92.1, 86.9, 81.2, 53.1, 21.8. IR (neat, cm<sup>-1</sup>): 2929, 2218, 1645, 1620, 1448, 1264, 1175, 1072, 734, 698; HRMS (ESI) *m/z*: [M+H]<sup>+</sup> Calcd for C<sub>24</sub>H<sub>21</sub>O<sub>2</sub> 341.1536; Found 341.1537 (0.3 ppm). This product was purified by flash column chromatography (silica

gel, petroleum ether/ethyl acetate, 30:1).

# $^1\text{H}$ , $^{13}\text{C}$ , and $^{19}\text{F}$ NMR Spectra

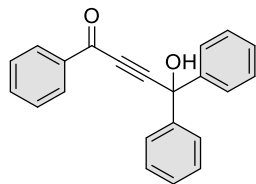

**1aa**

$^1\text{H}$  NMR spectrum was recorded on 400 MHz in  $\text{CDCl}_3$ .

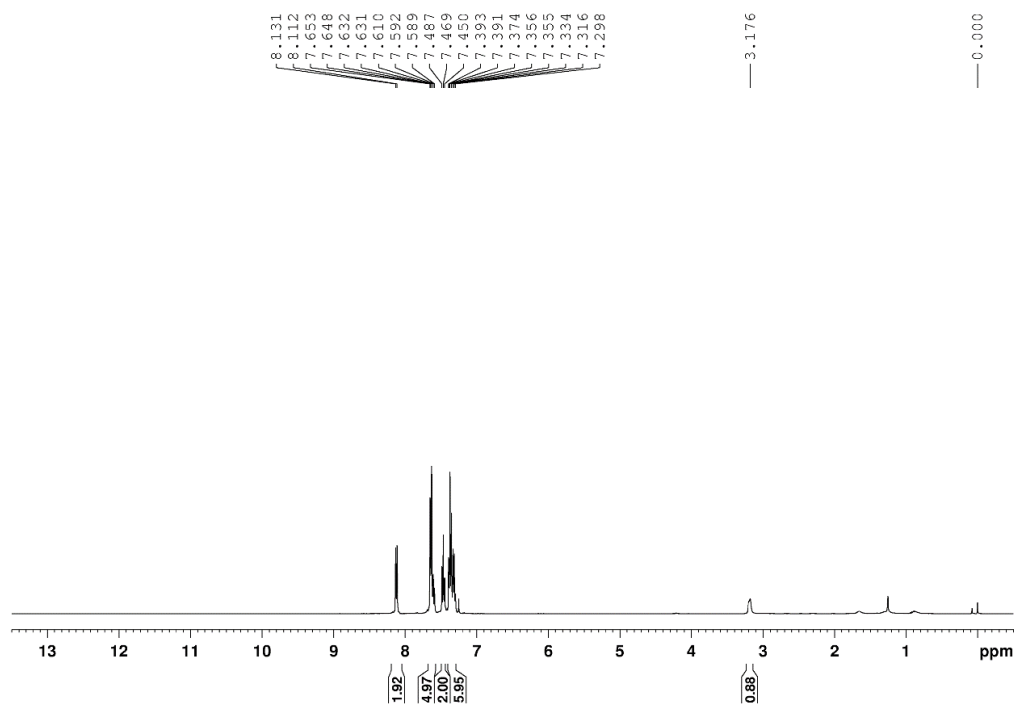

$^{13}\text{C}\{^1\text{H}\}$  NMR spectrum was recorded on 151 MHz in  $\text{CDCl}_3$ .

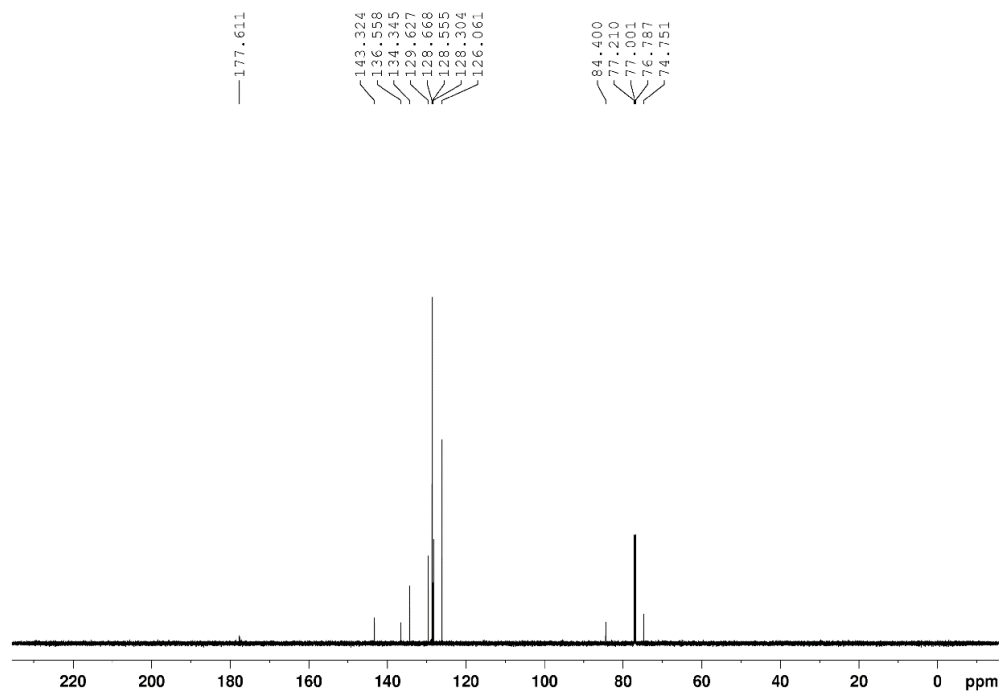

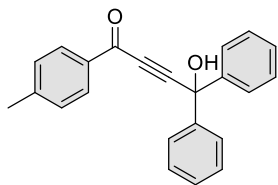

**1ab**

$^1\text{H}$  NMR spectrum was recorded on 400 MHz in  $\text{CDCl}_3$ .

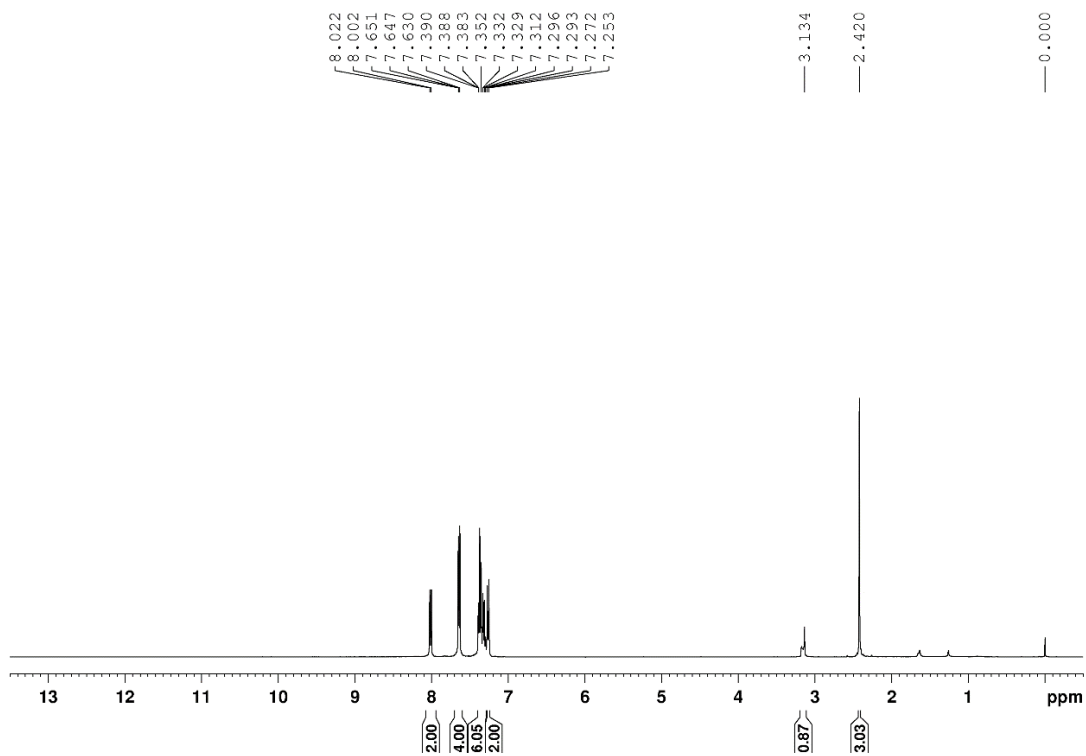

$^{13}\text{C}\{\text{H}\}$  NMR spectrum was recorded on 151 MHz in  $\text{CDCl}_3$ .

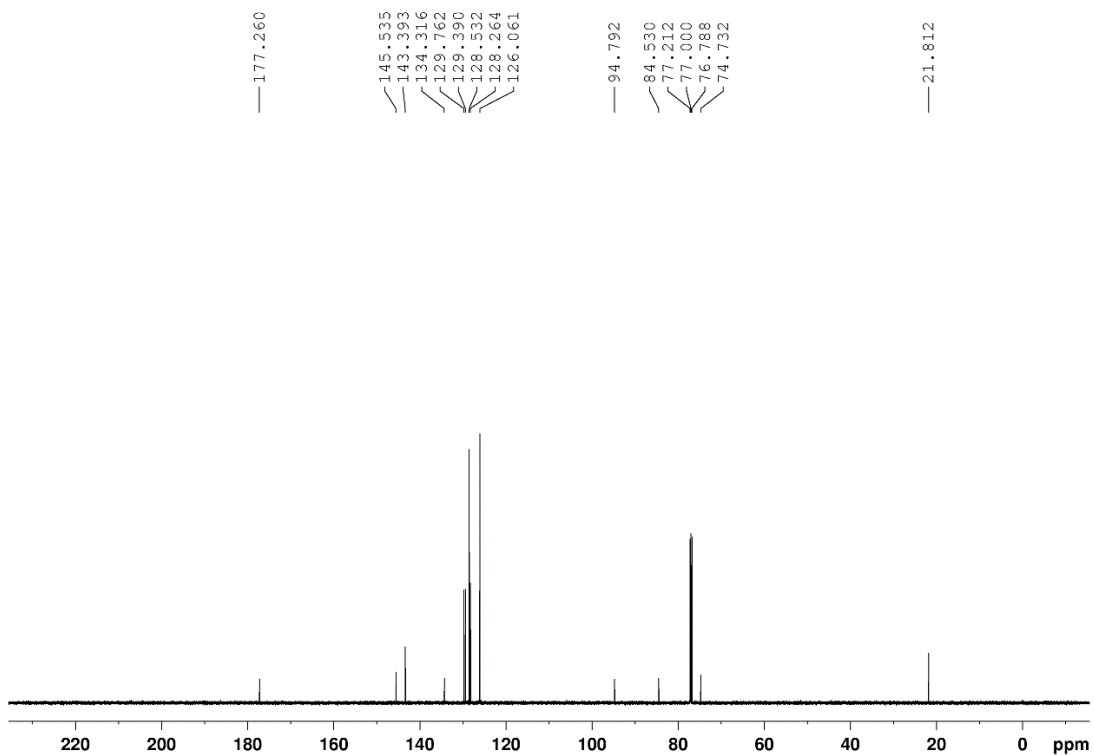

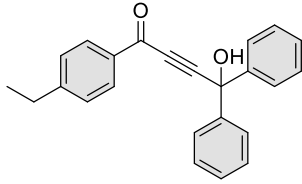

**1ac**

$^1\text{H}$  NMR spectrum was recorded on 400 MHz in  $\text{CDCl}_3$ .

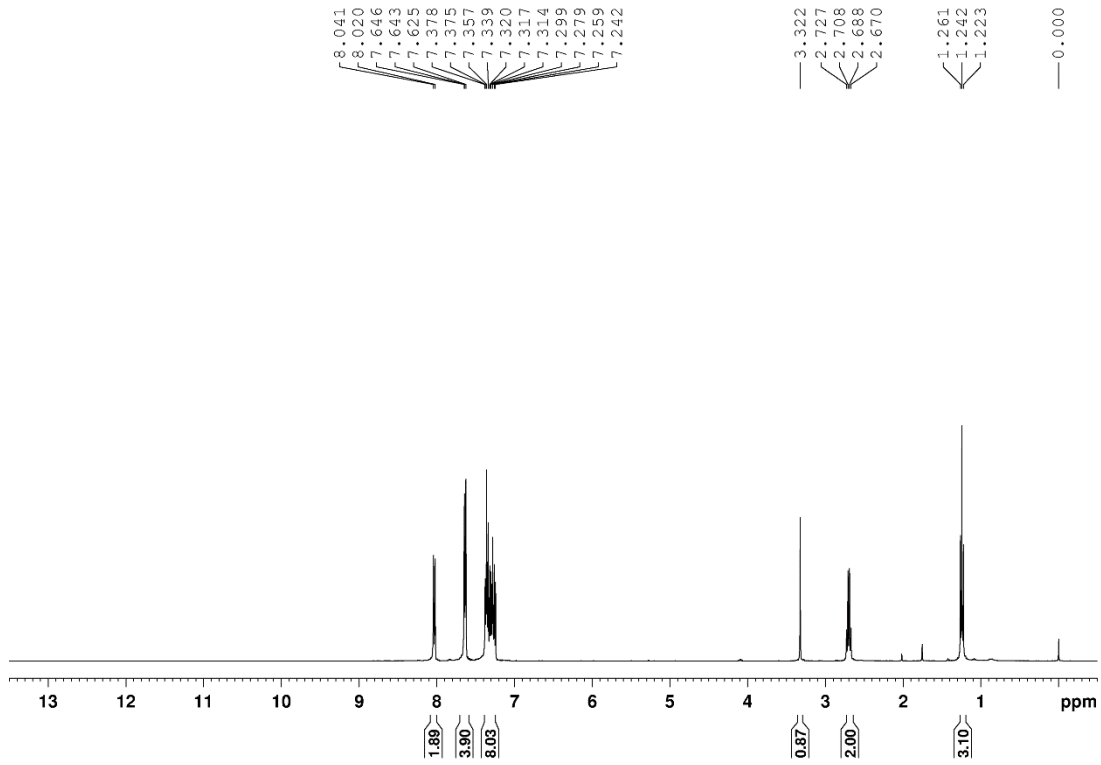

$^{13}\text{C}\{^1\text{H}\}$  NMR spectrum was recorded on 151 MHz in  $\text{CDCl}_3$ .

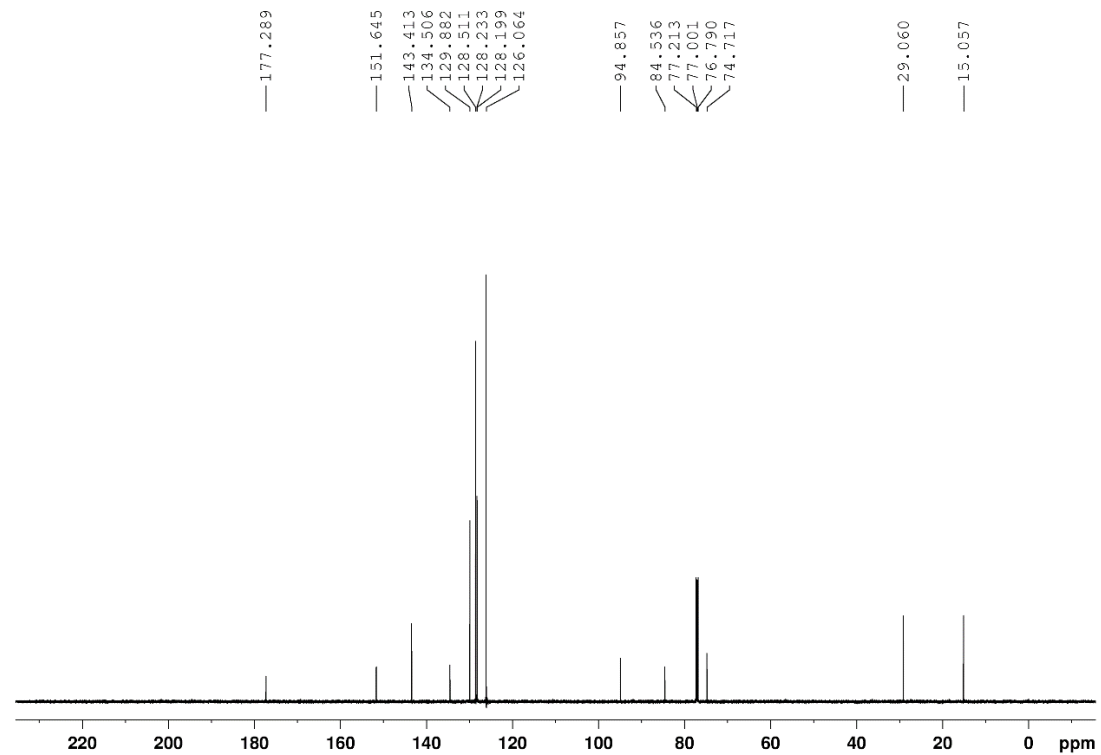

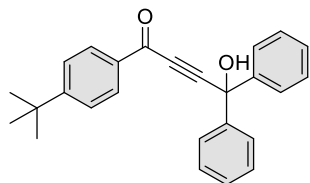

**1ad**

<sup>1</sup>H NMR spectrum was recorded on 400 MHz in CDCl<sub>3</sub>.

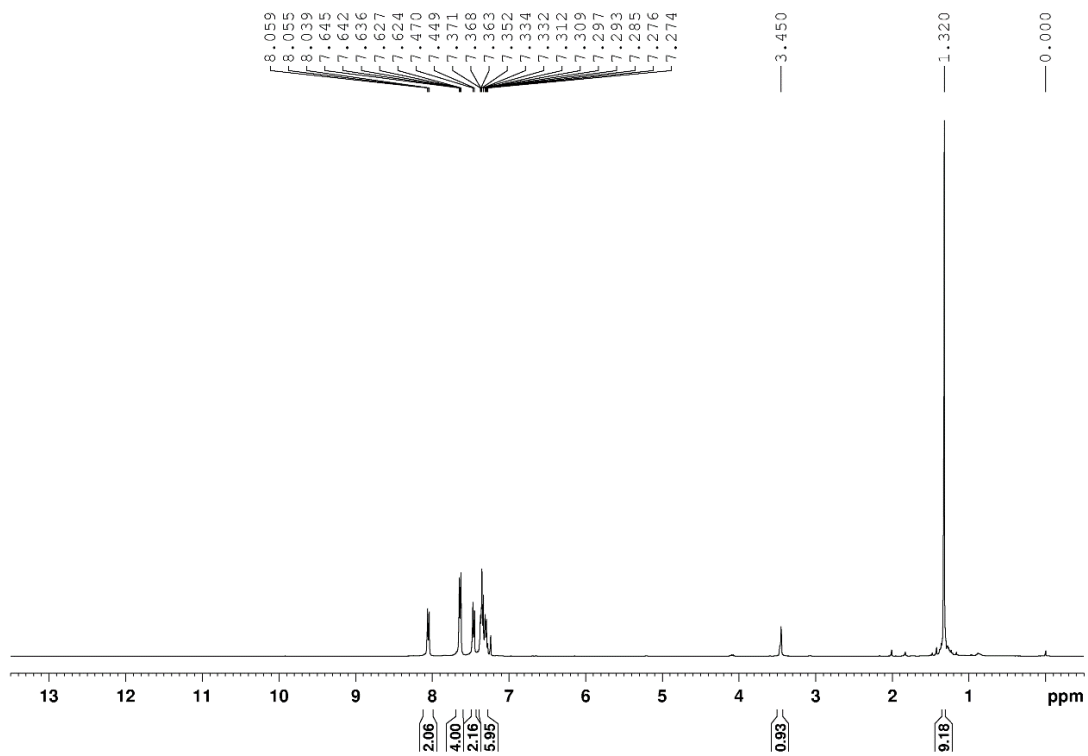

<sup>13</sup>C{<sup>1</sup>H} NMR spectrum was recorded on 151 MHz in CDCl<sub>3</sub>.

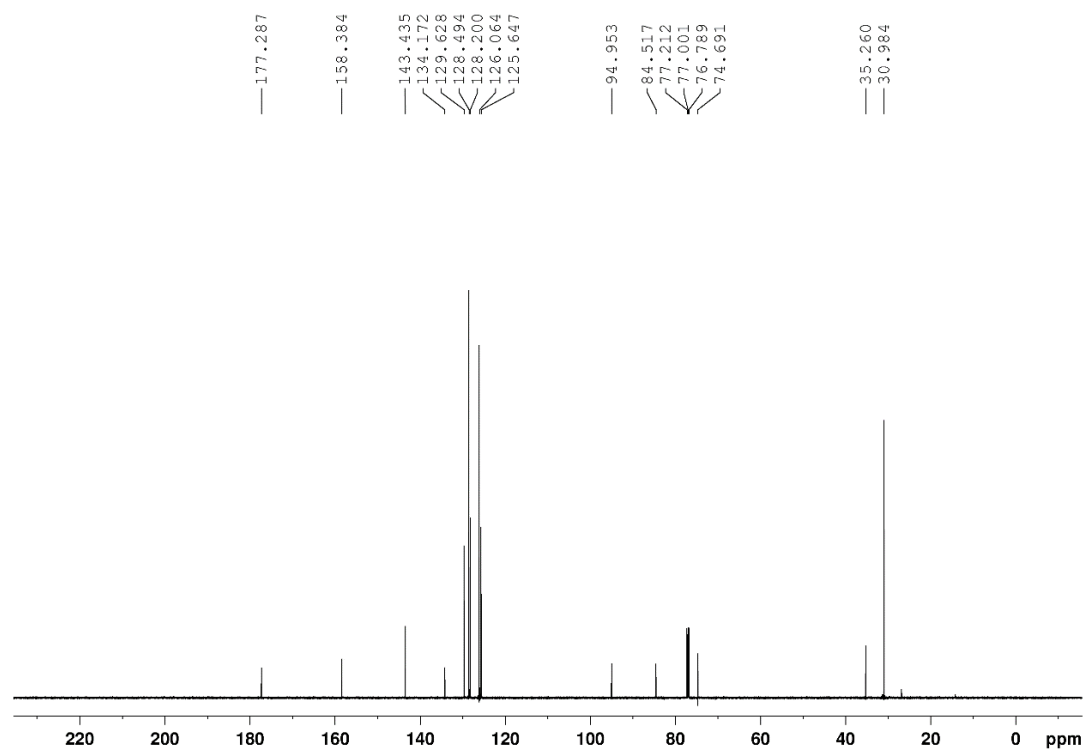

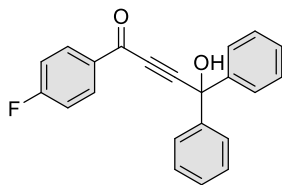

**1ae**

$^1\text{H}$  NMR spectrum was recorded on 400 MHz in  $\text{CDCl}_3$ .

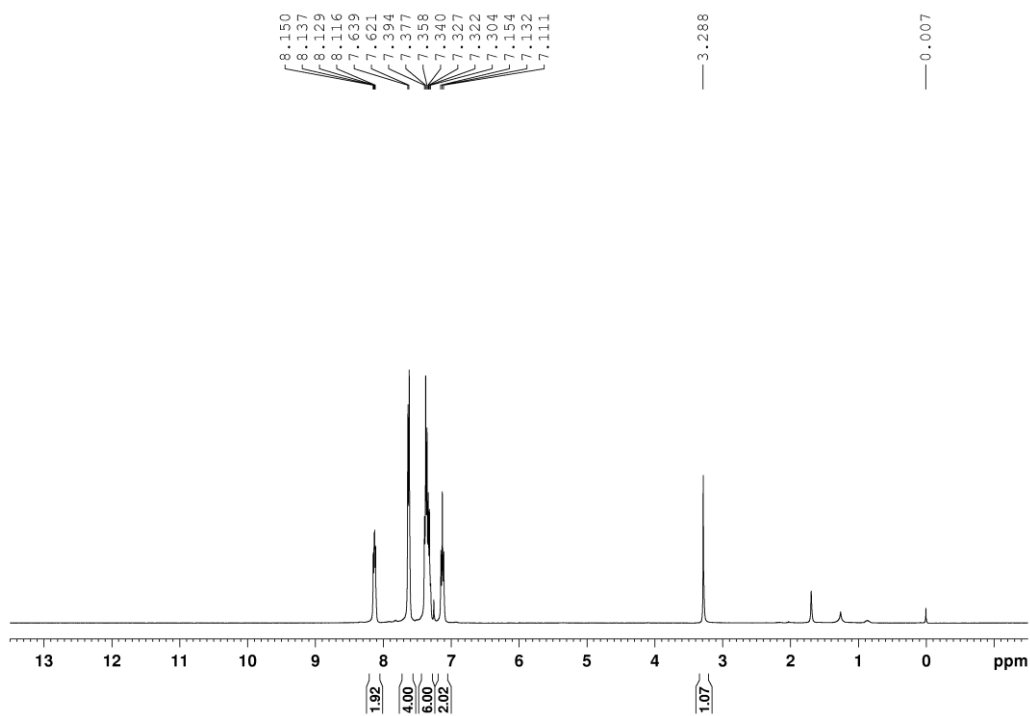

$^{13}\text{C}\{\text{H}\}$  NMR spectrum was recorded on 151 MHz in  $\text{CDCl}_3$ .

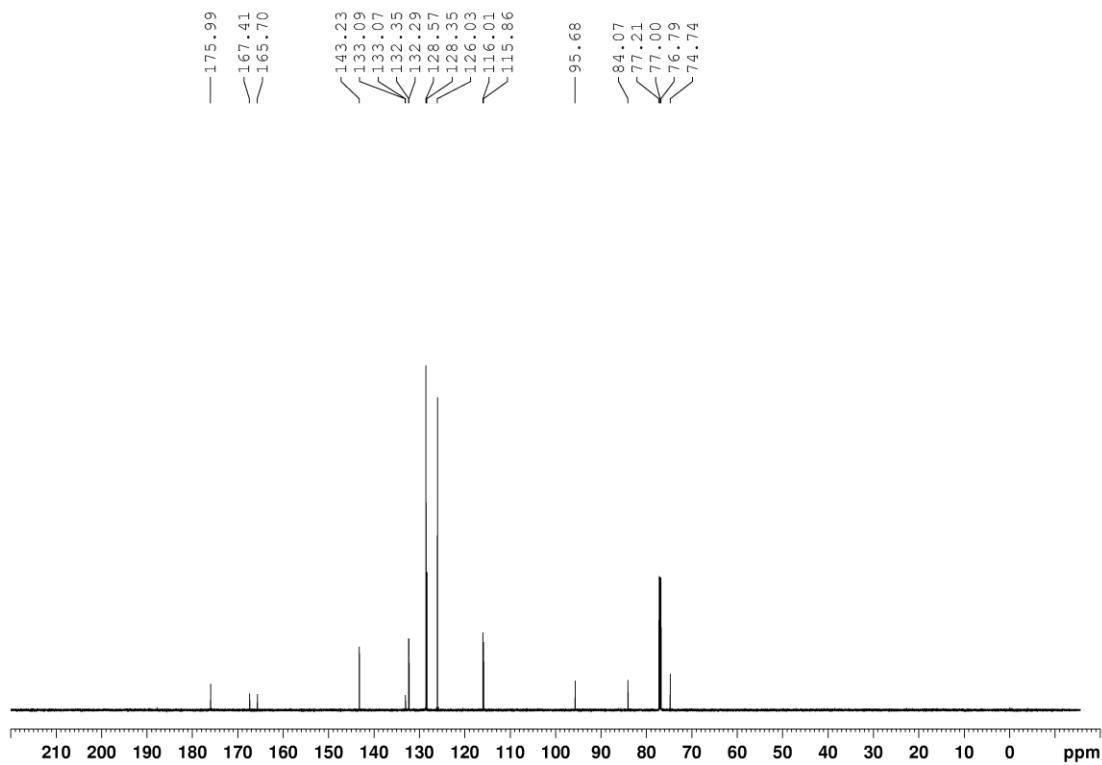

<sup>19</sup>F spectrum was recorded on 376 MHz in CDCl<sub>3</sub>.

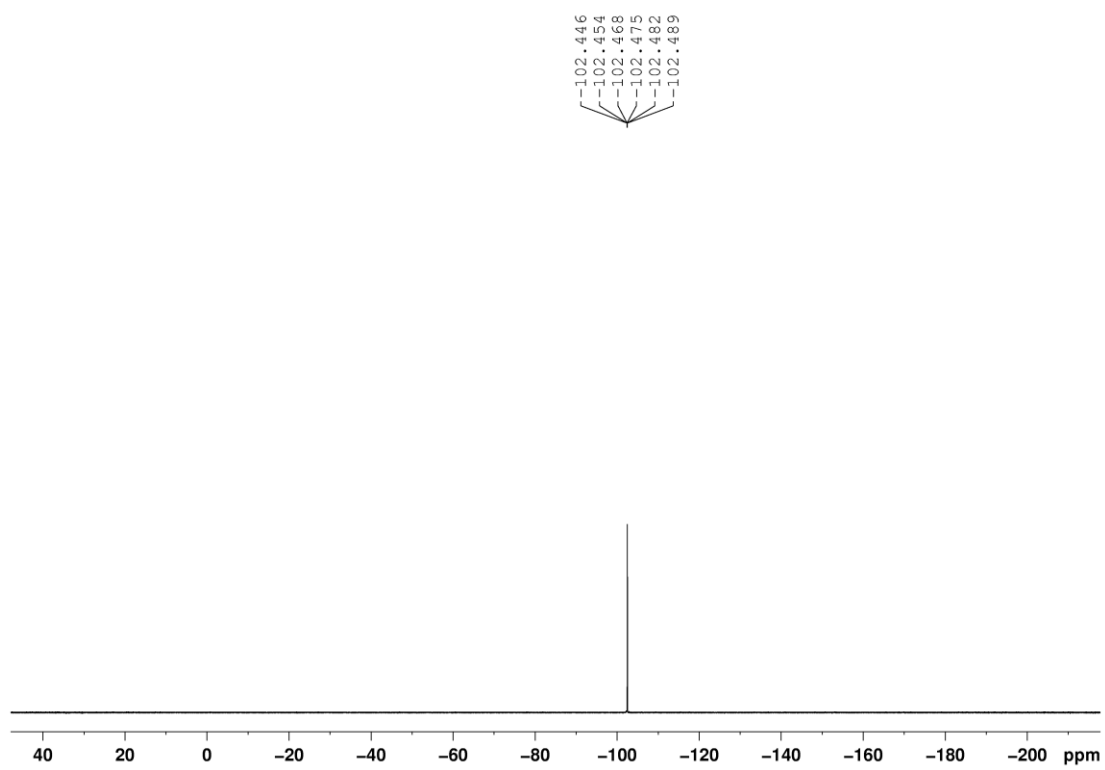



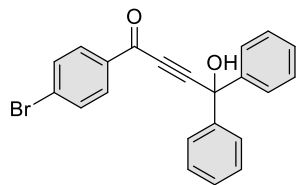

**1af**

$^1\text{H}$  NMR spectrum was recorded on 400 MHz in  $\text{CDCl}_3$ .

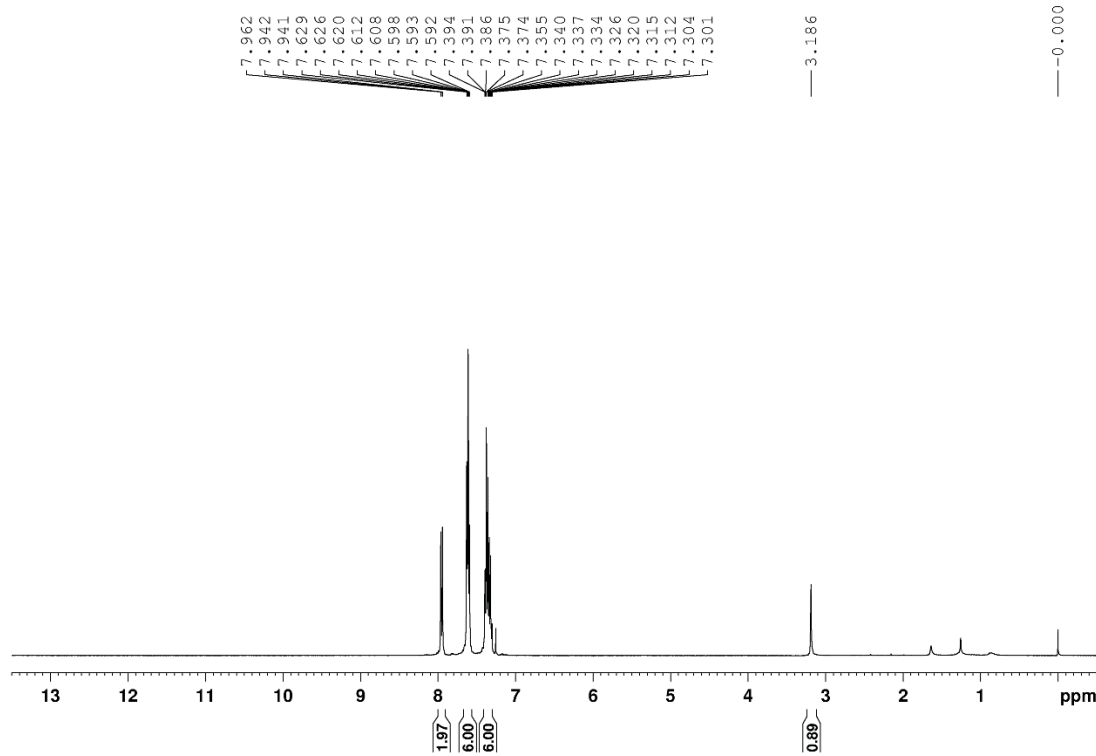

$^{13}\text{C}\{^1\text{H}\}$  NMR spectrum was recorded on 151 MHz in  $\text{CDCl}_3$ .

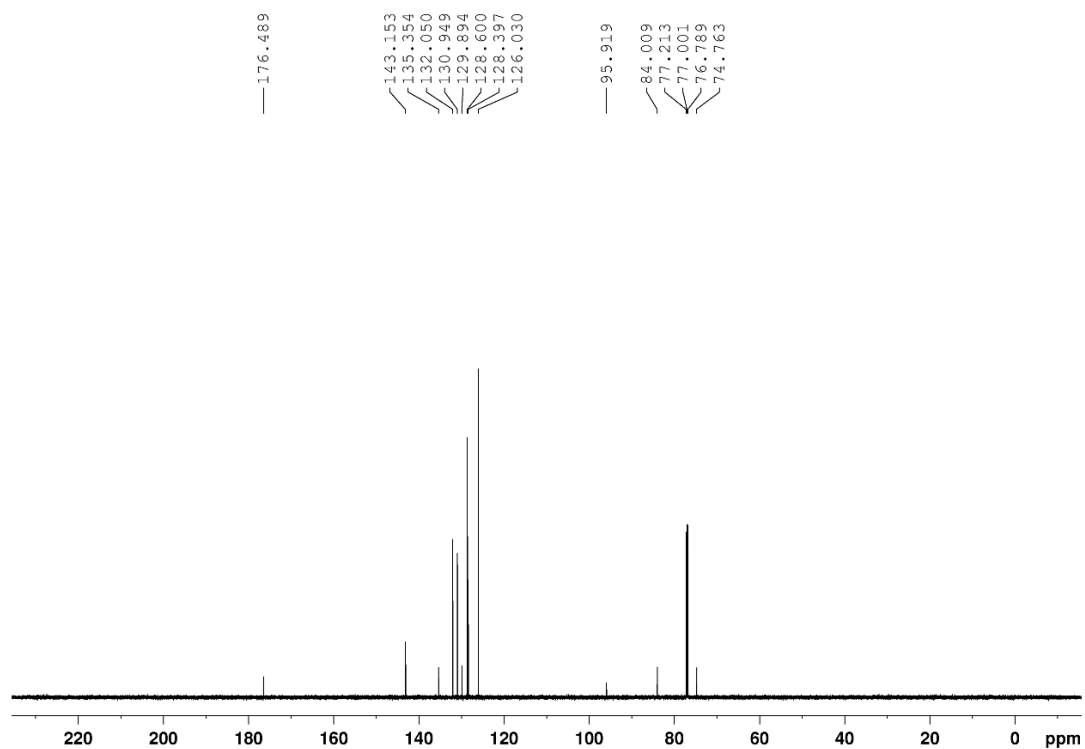

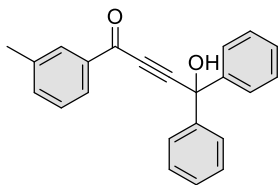

**1ag**

$^1\text{H}$  NMR spectrum was recorded on 400 MHz in  $\text{CDCl}_3$ .

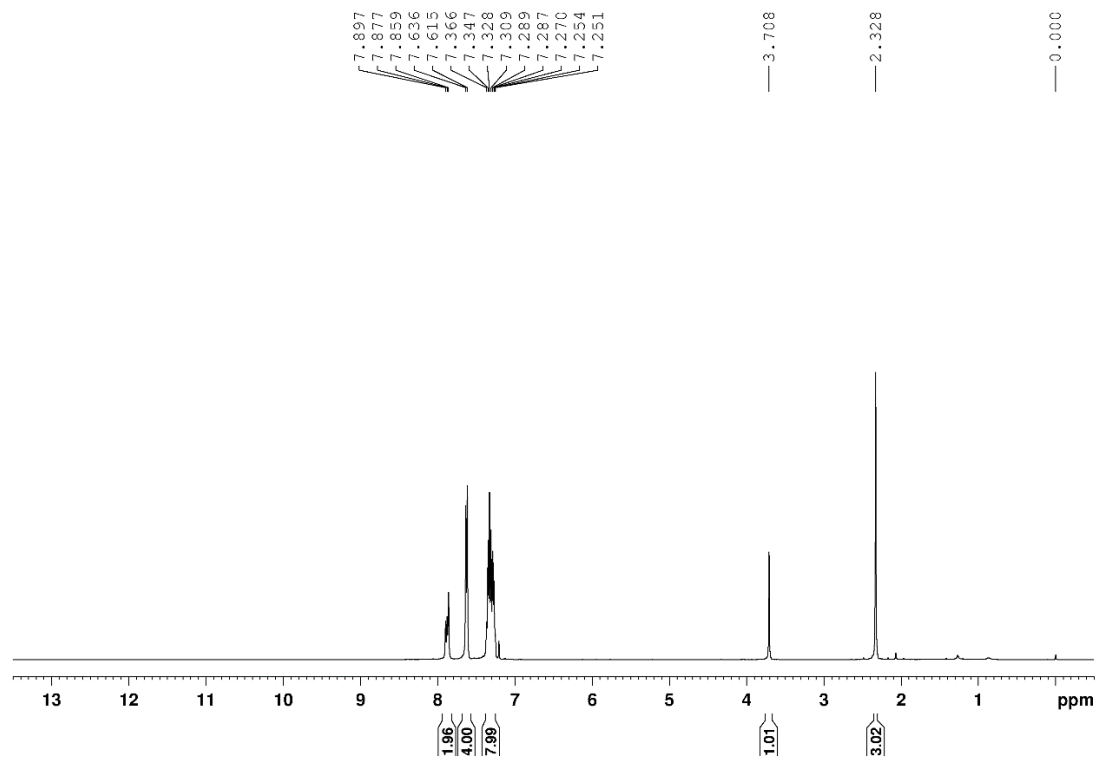

$^{13}\text{C}\{^1\text{H}\}$  NMR spectrum was recorded on 151 MHz in  $\text{CDCl}_3$ .

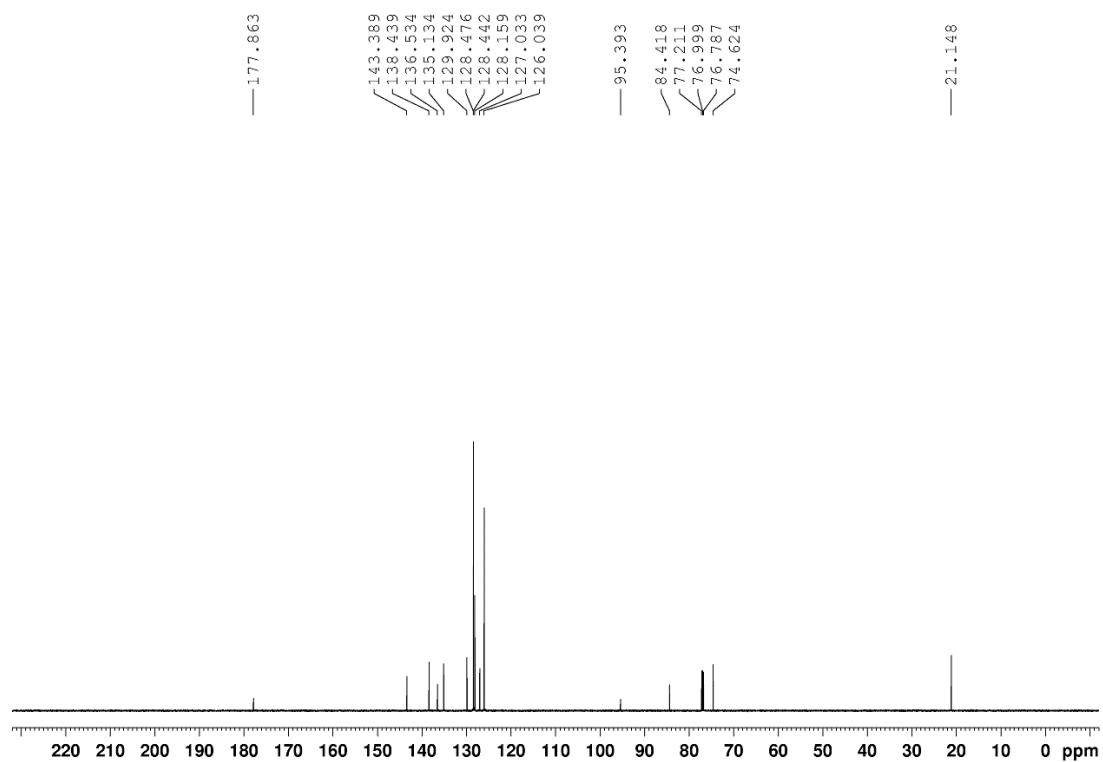

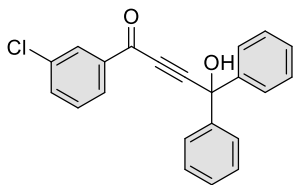

**1ah**

<sup>1</sup>H NMR spectrum was recorded on 400 MHz in CDCl<sub>3</sub>.

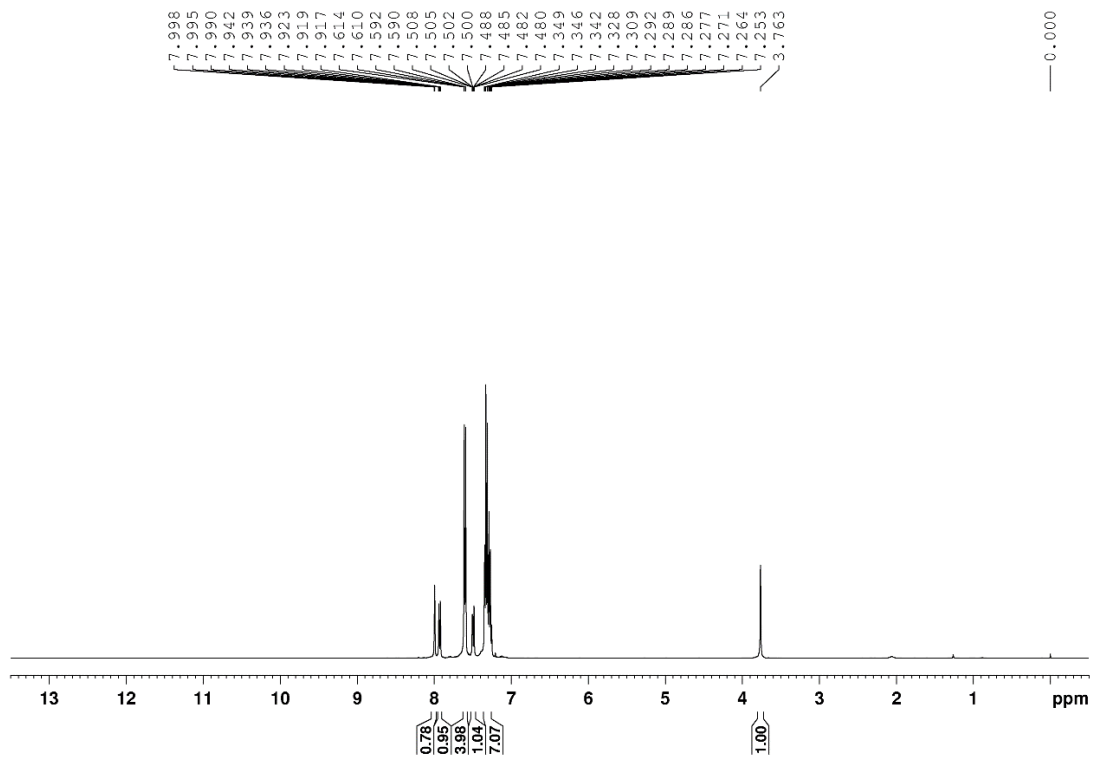

— 0.000

<sup>13</sup>C{H} NMR spectrum was recorded on 151 MHz in CDCl<sub>3</sub>.

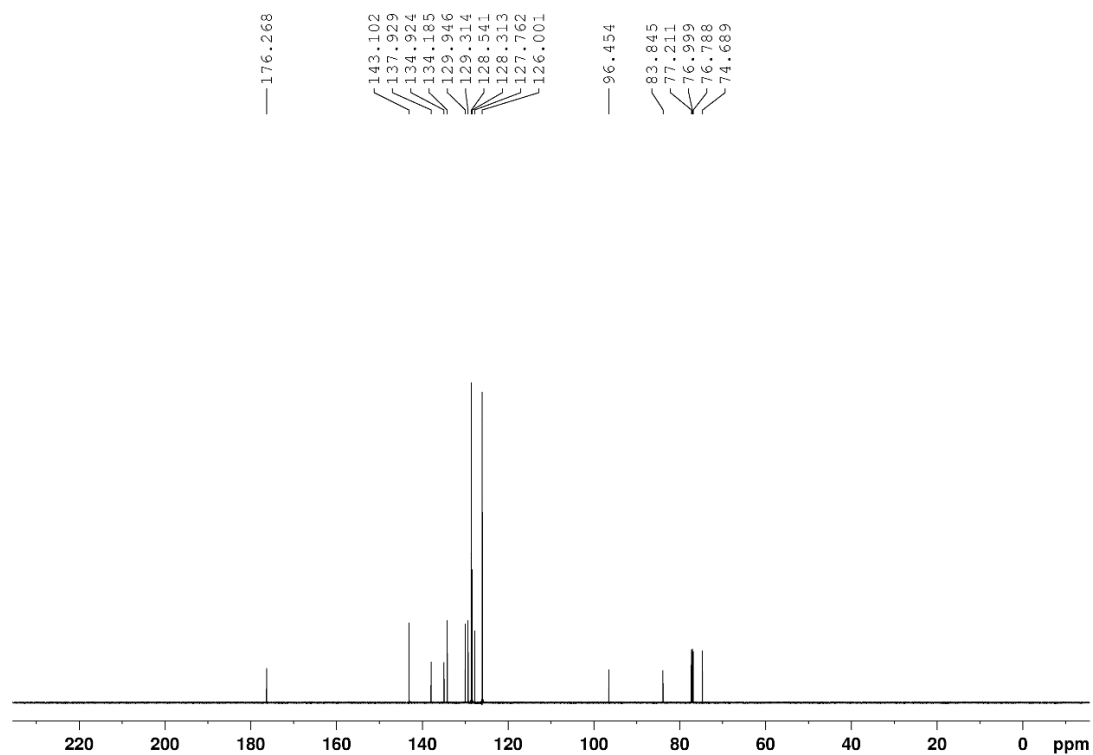

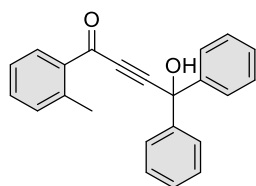

**1ai**

$^1\text{H}$  NMR spectrum was recorded on 400 MHz in  $\text{CDCl}_3$ .

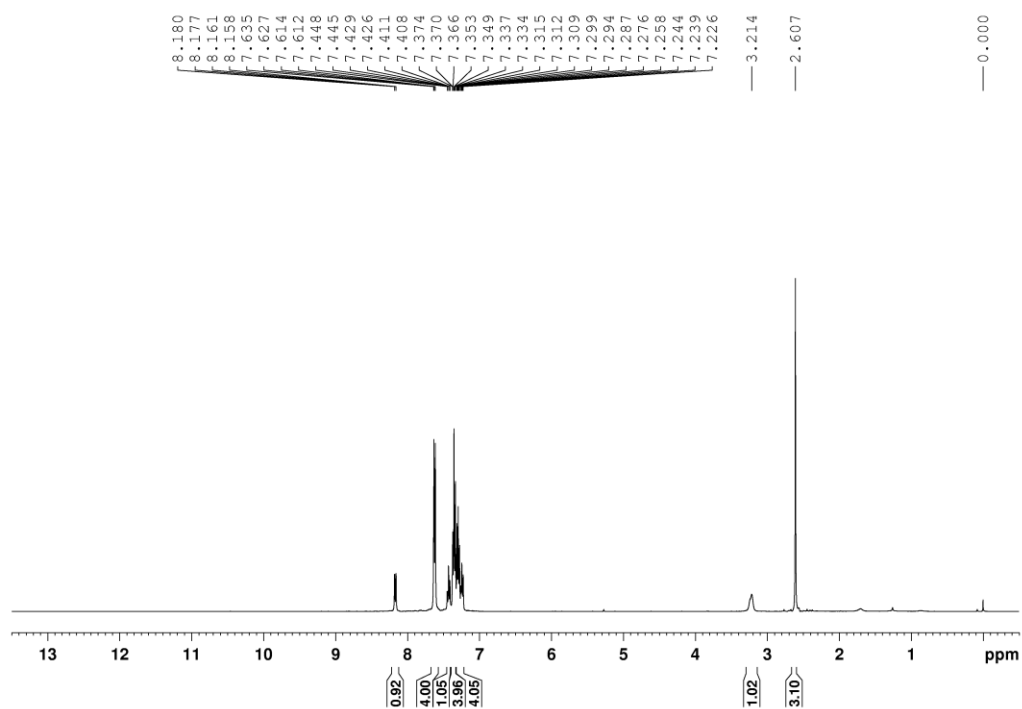

$^{13}\text{C}\{^1\text{H}\}$  NMR spectrum was recorded on 151 MHz in  $\text{CDCl}_3$ .

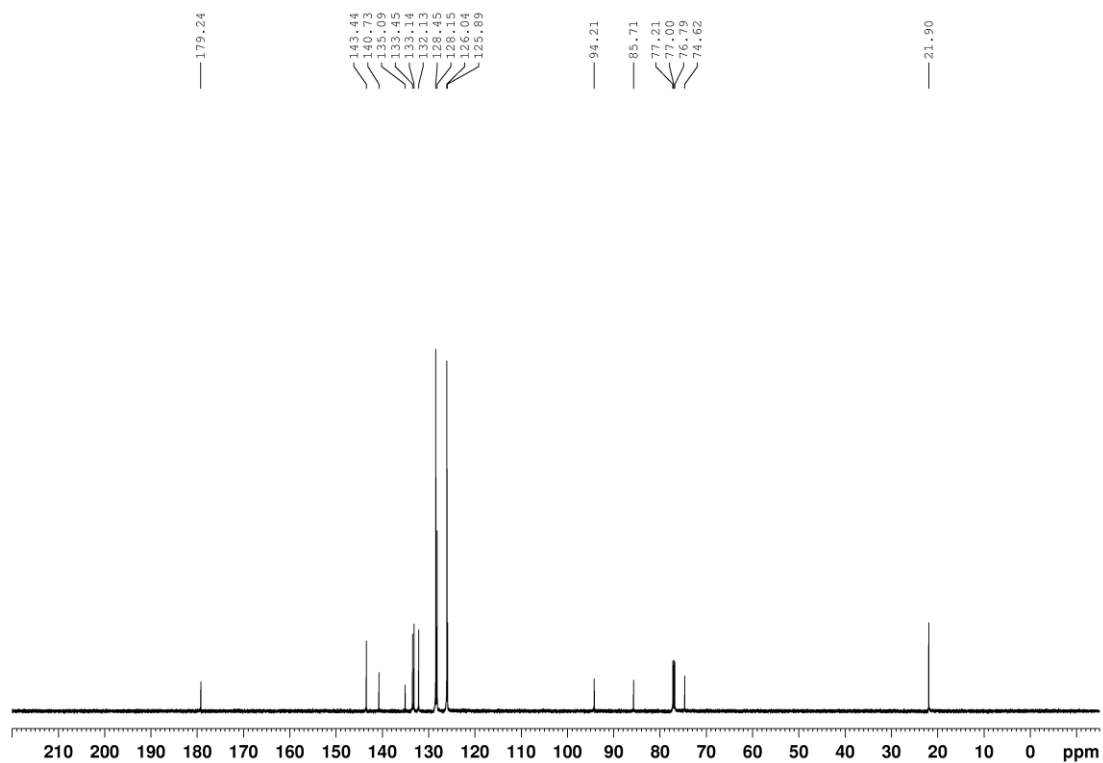

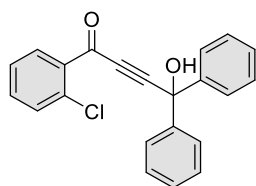

**1aj**

$^1\text{H}$  NMR spectrum was recorded on 400 MHz in  $\text{CDCl}_3$ .

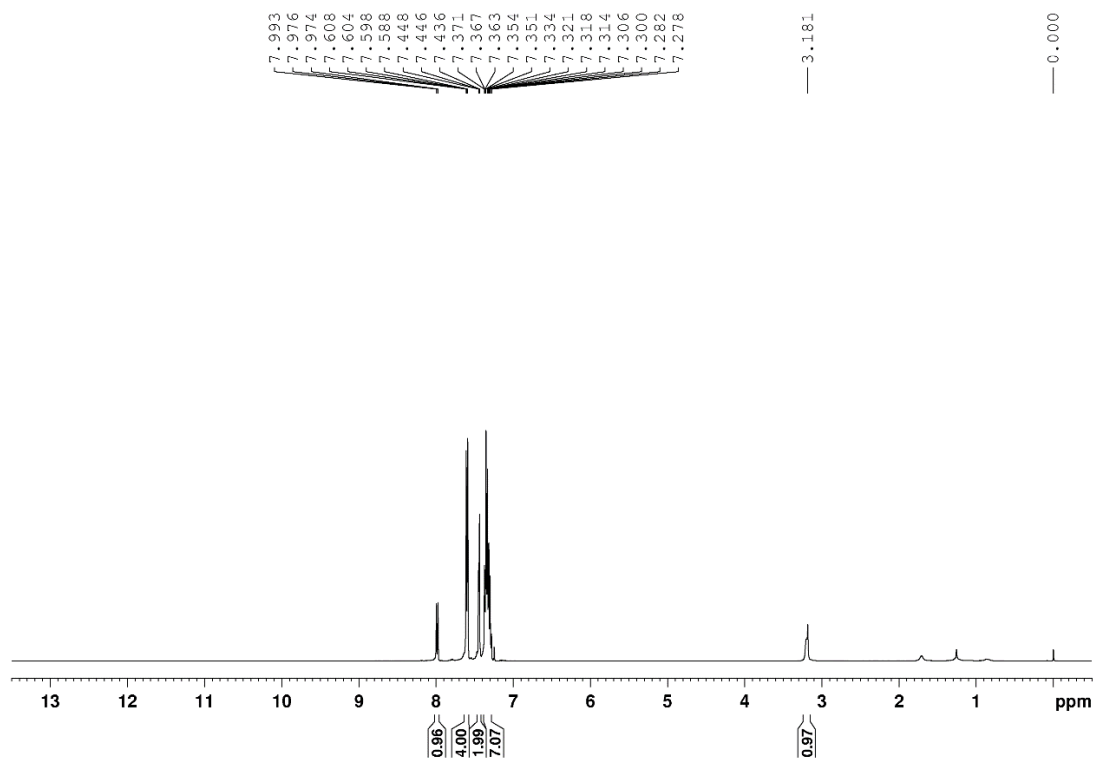

$^{13}\text{C}\{^1\text{H}\}$  NMR spectrum was recorded on 151 MHz in  $\text{CDCl}_3$ .

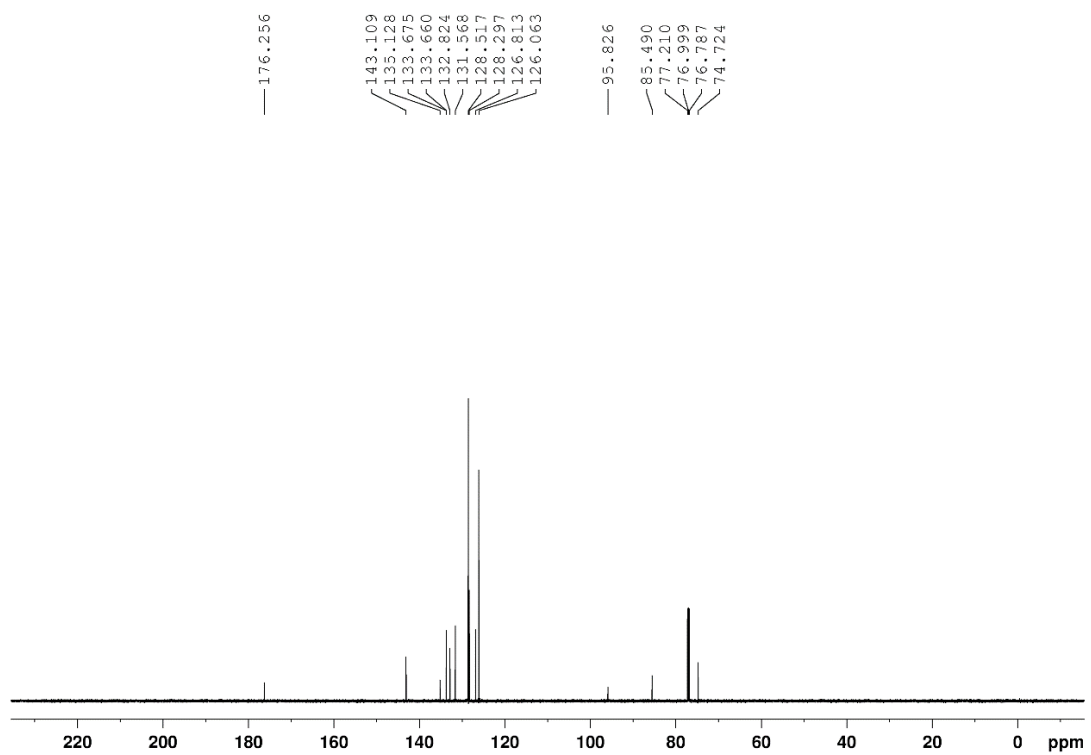

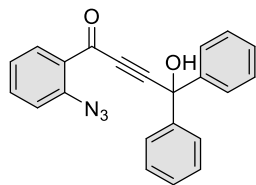

**1ak**

<sup>1</sup>H NMR spectrum was recorded on 600 MHz in d<sub>6</sub>-acetone.

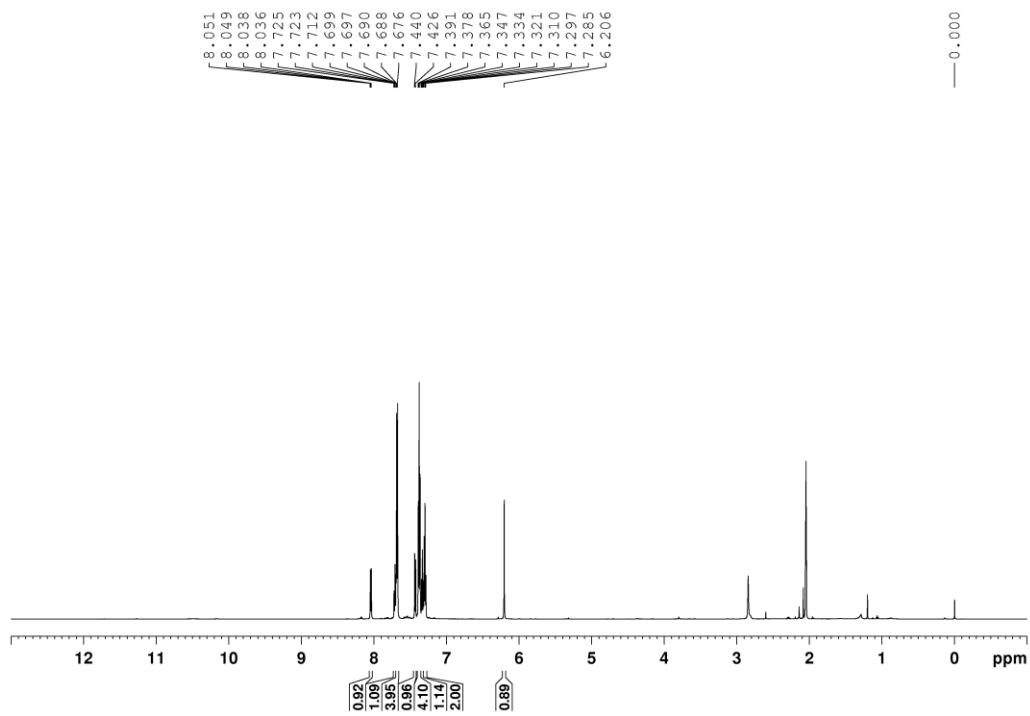

<sup>13</sup>C{<sup>1</sup>H} NMR spectrum was recorded on 151 MHz in d<sub>6</sub>-acetone

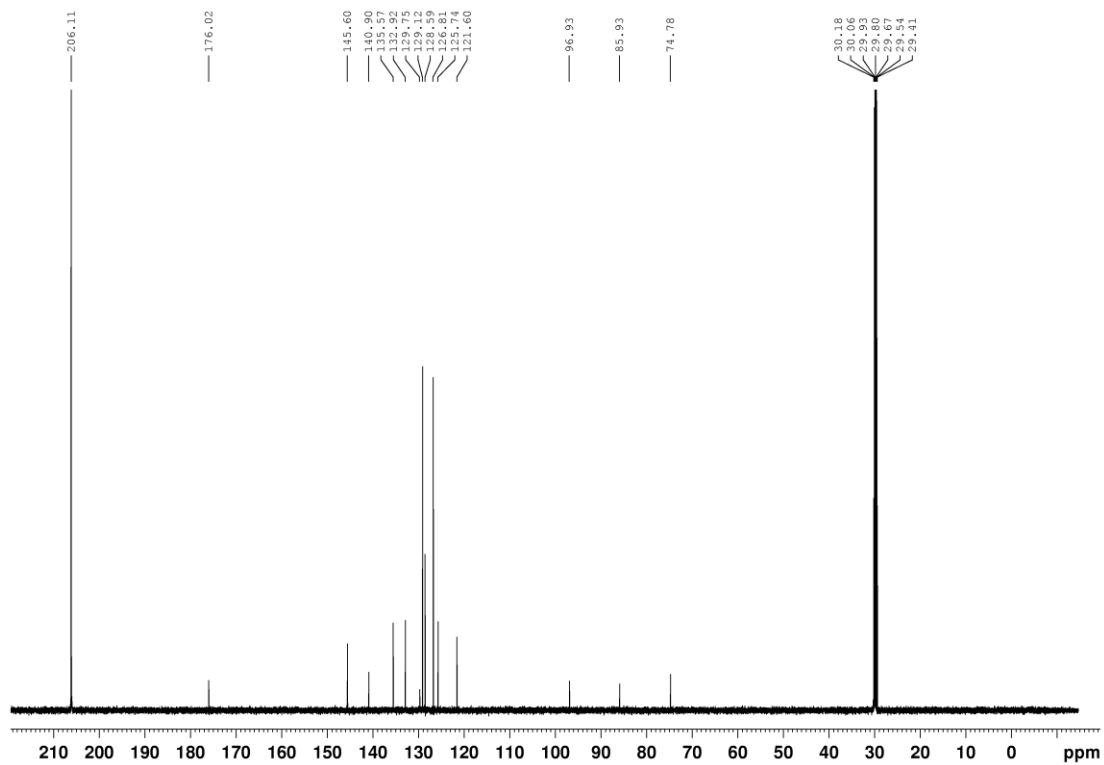

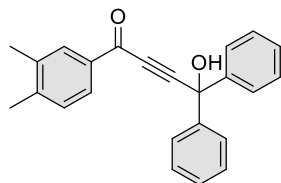

**1a**

$^1\text{H}$  NMR spectrum was recorded on 400 MHz in  $\text{CDCl}_3$ .

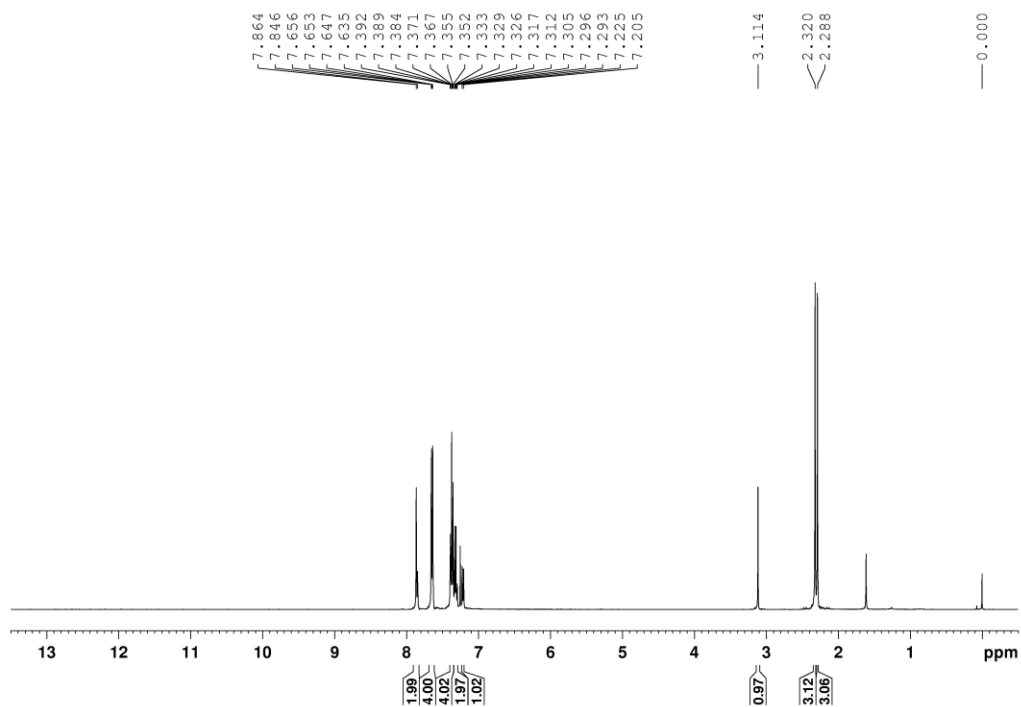

$^{13}\text{C}\{\text{H}\}$  NMR spectrum was recorded on 151 MHz in  $\text{CDCl}_3$ .

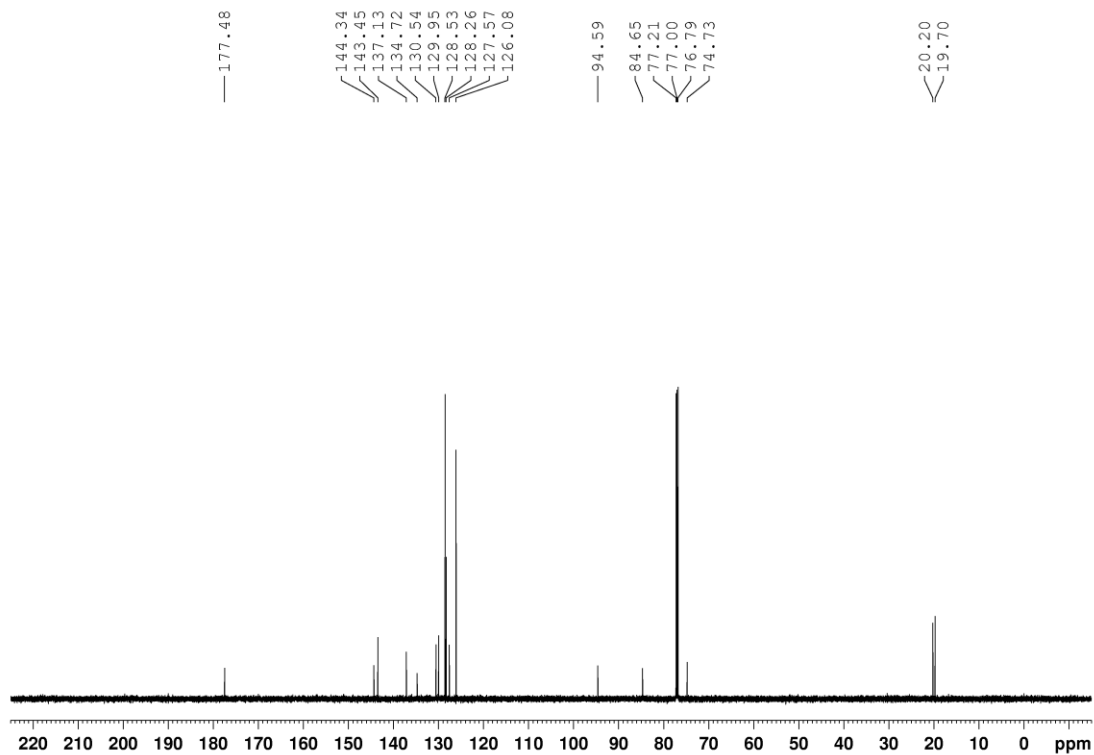

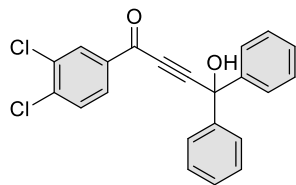

**1am**

<sup>1</sup>H NMR spectrum was recorded on 400 MHz in CDCl<sub>3</sub>.

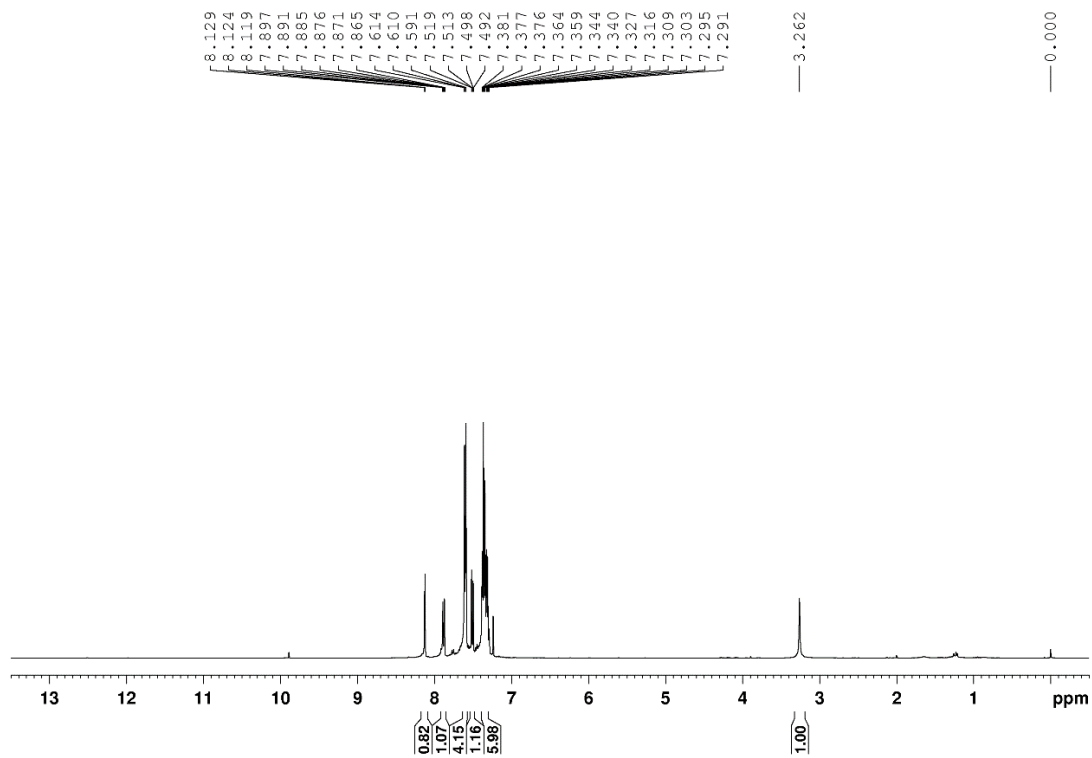

<sup>13</sup>C{<sup>1</sup>H} NMR spectrum was recorded on 151 MHz in CDCl<sub>3</sub>.

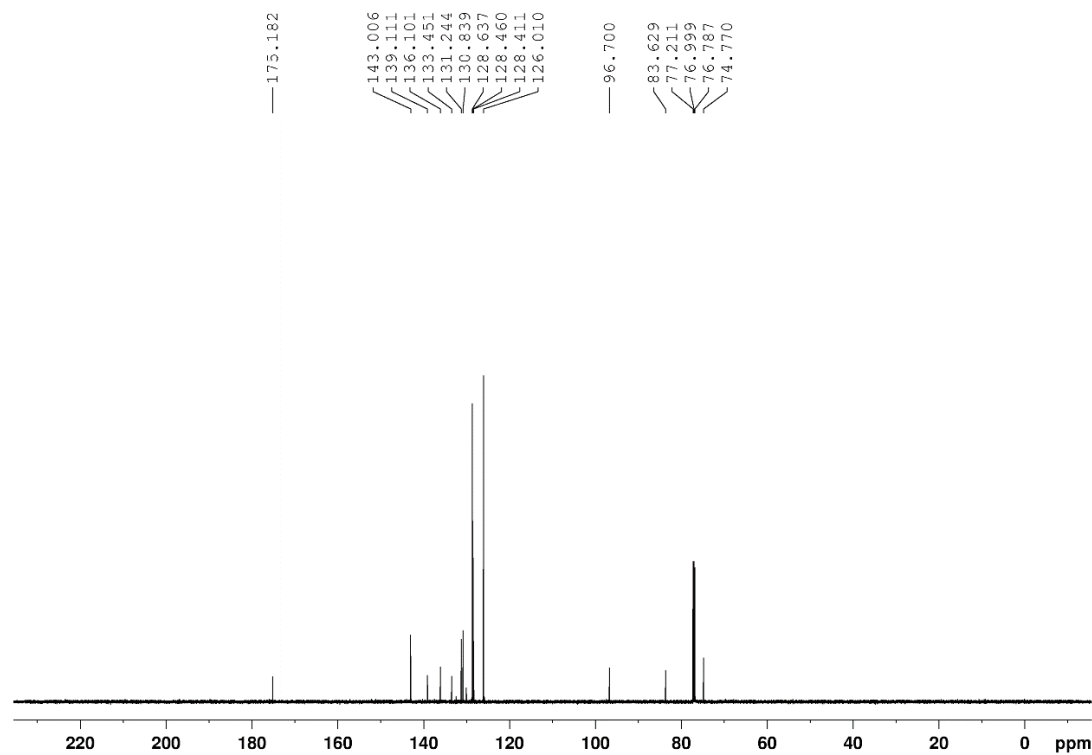



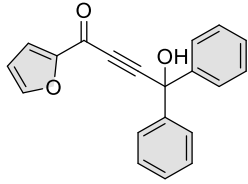

**1an**

$^1\text{H}$  NMR spectrum was recorded on 600 MHz in  $\text{CDCl}_3$ .

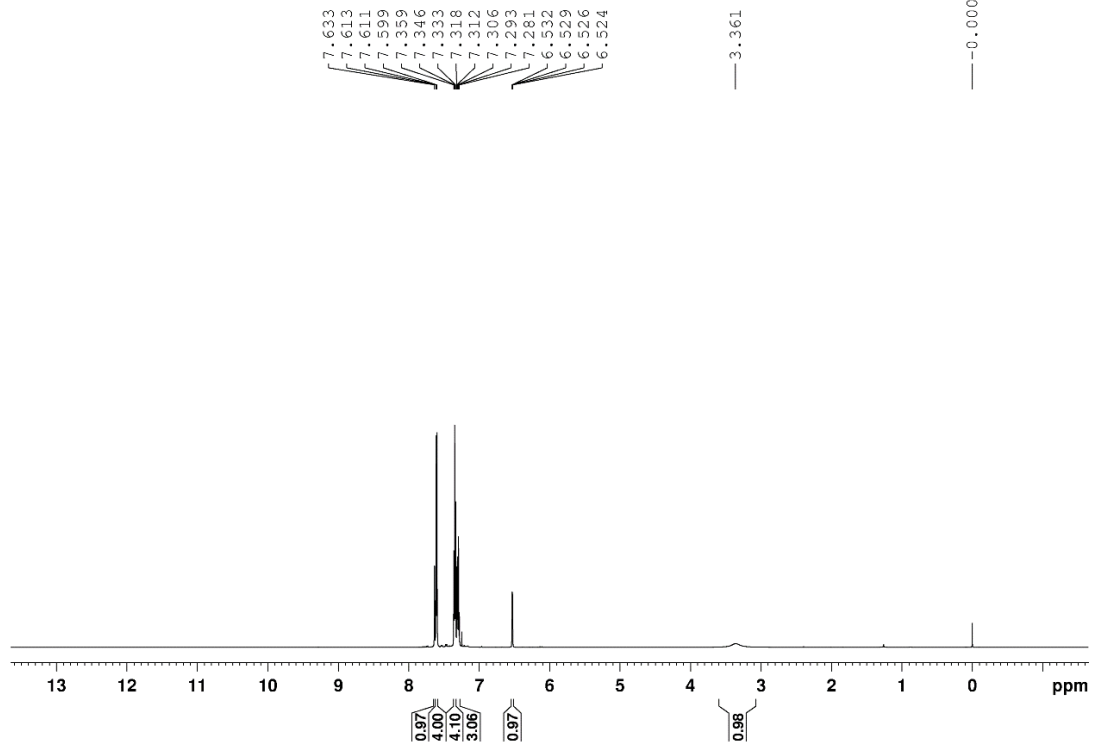

$^{13}\text{C}\{^1\text{H}\}$  NMR spectrum was recorded on 151 MHz in  $\text{CDCl}_3$ .

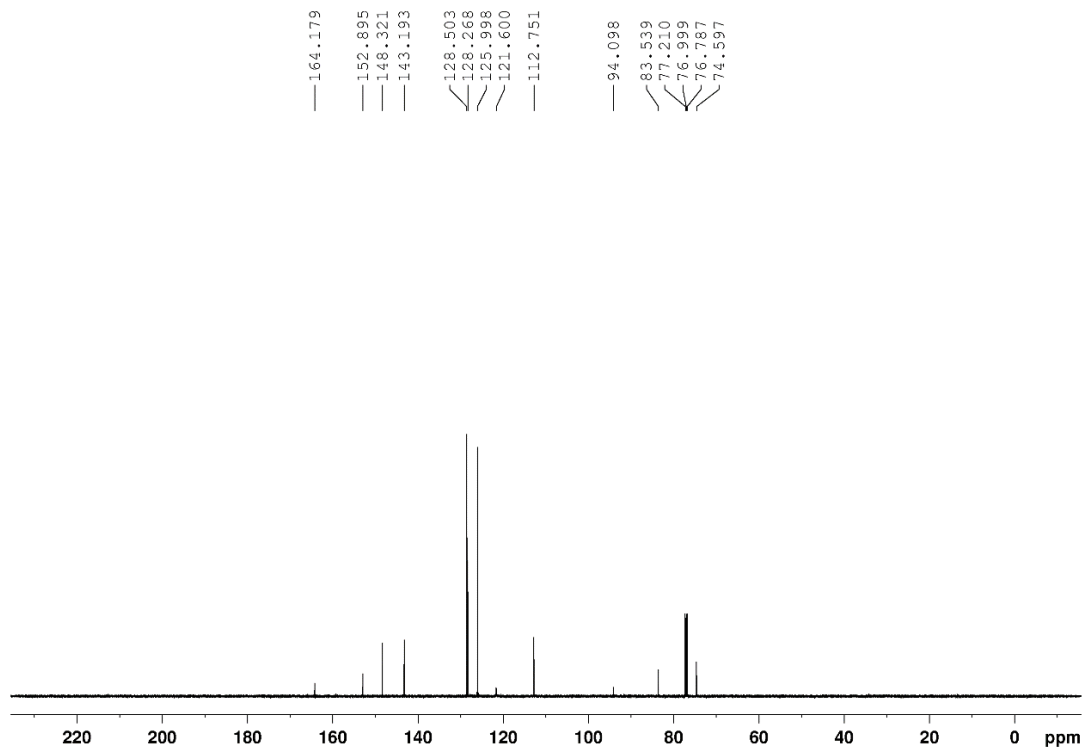

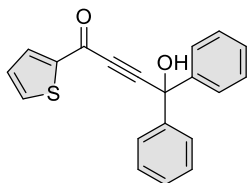

**1ao**

$^1\text{H}$  NMR spectrum was recorded on 400 MHz in  $\text{CDCl}_3$ .

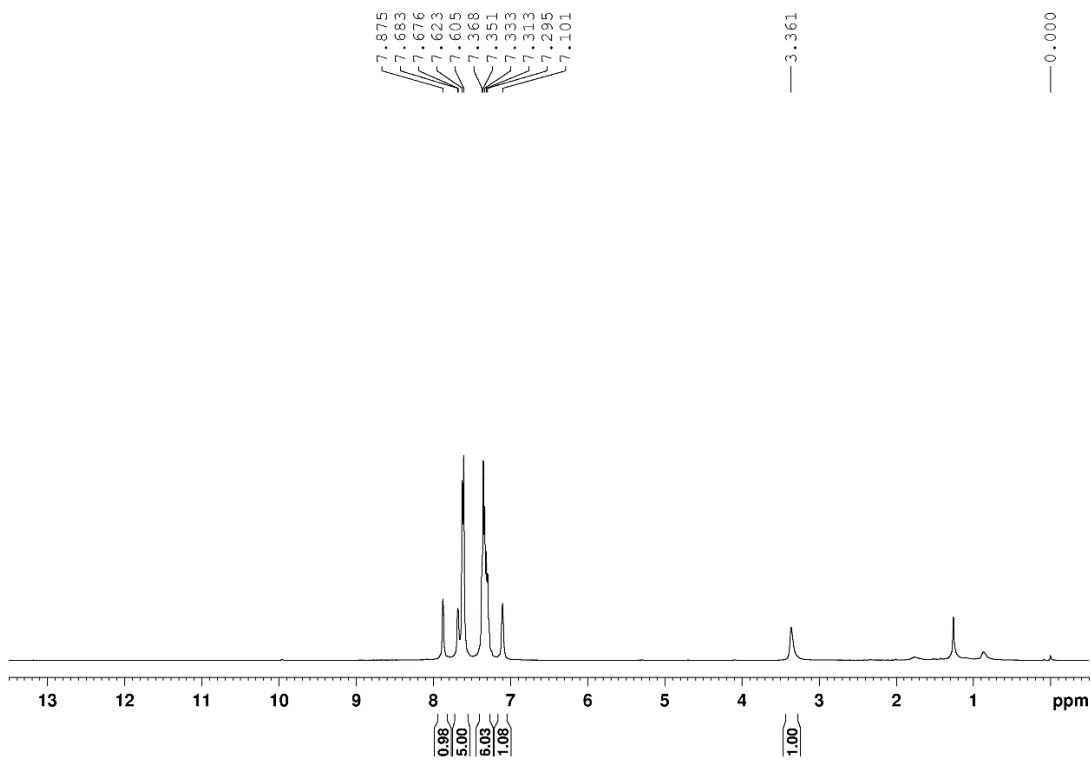

$^{13}\text{C}\{^1\text{H}\}$  NMR spectrum was recorded on 151 MHz in  $\text{CDCl}_3$ .

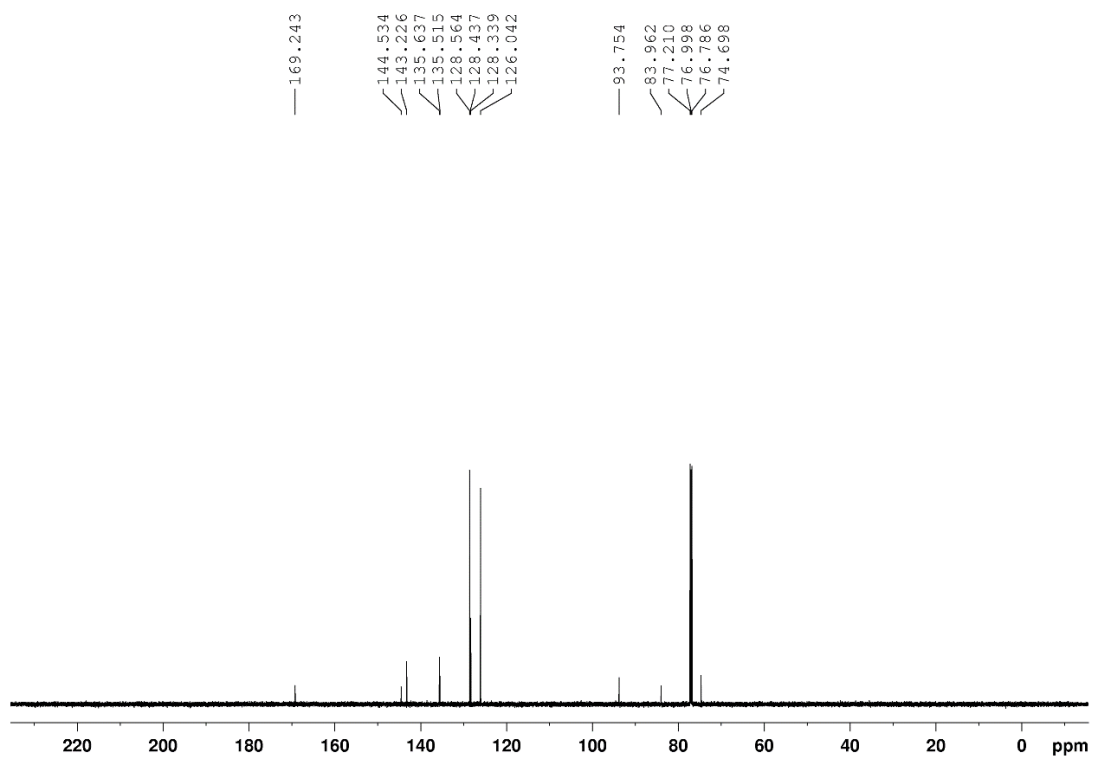

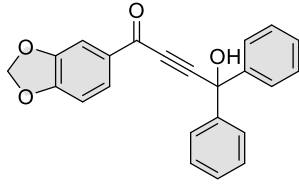

**1ap**

<sup>1</sup>H NMR spectrum was recorded on 600 MHz in CDCl<sub>3</sub>.

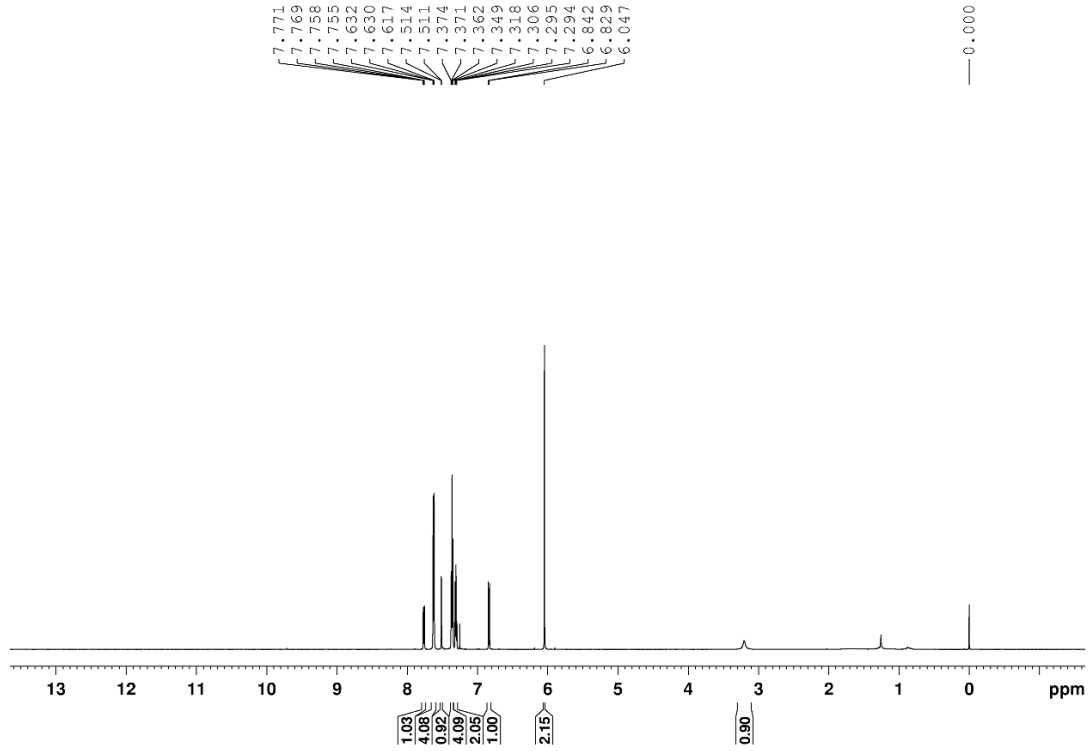

<sup>13</sup>C{<sup>1</sup>H} NMR spectrum was recorded on 151 MHz in CDCl<sub>3</sub>.

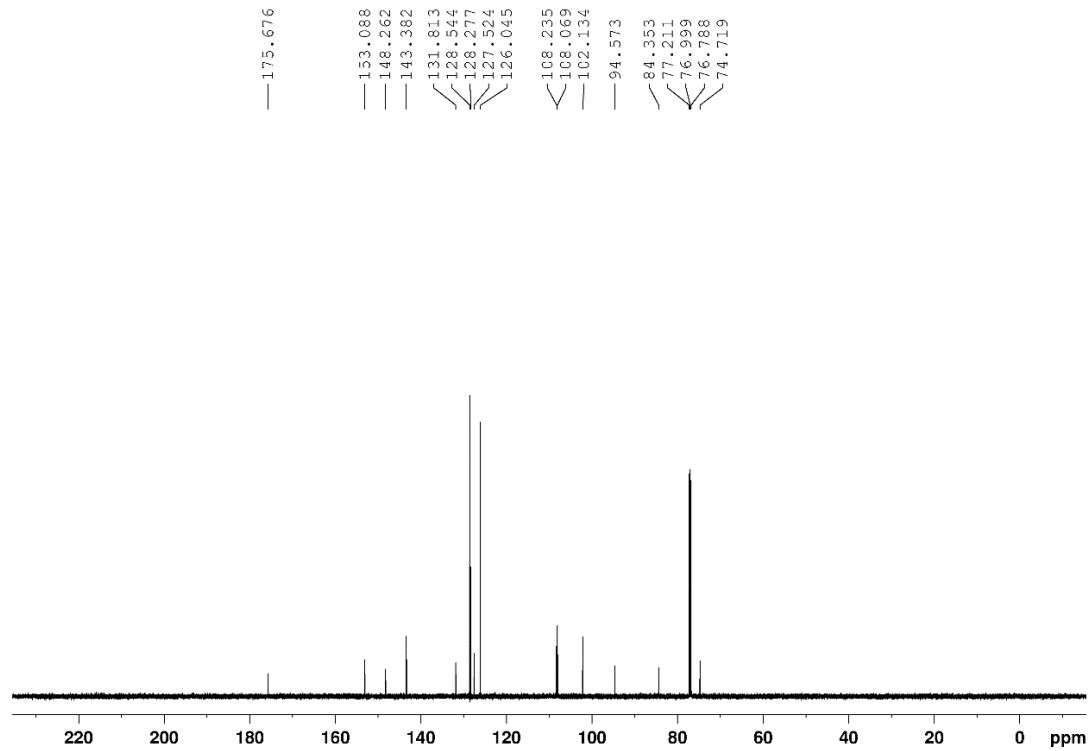

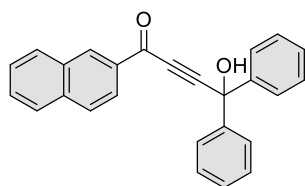

**1aq**

<sup>1</sup>H NMR spectrum was recorded on 400 MHz in CDCl<sub>3</sub>.

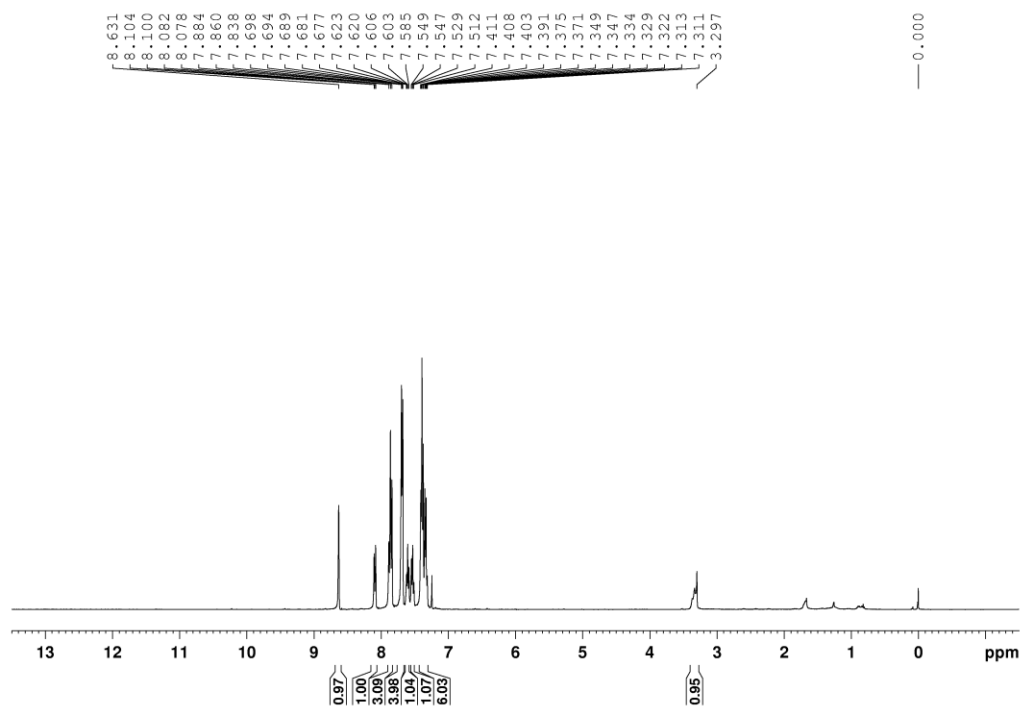

<sup>13</sup>C{H} NMR spectrum was recorded on 151 MHz in CDCl<sub>3</sub>.

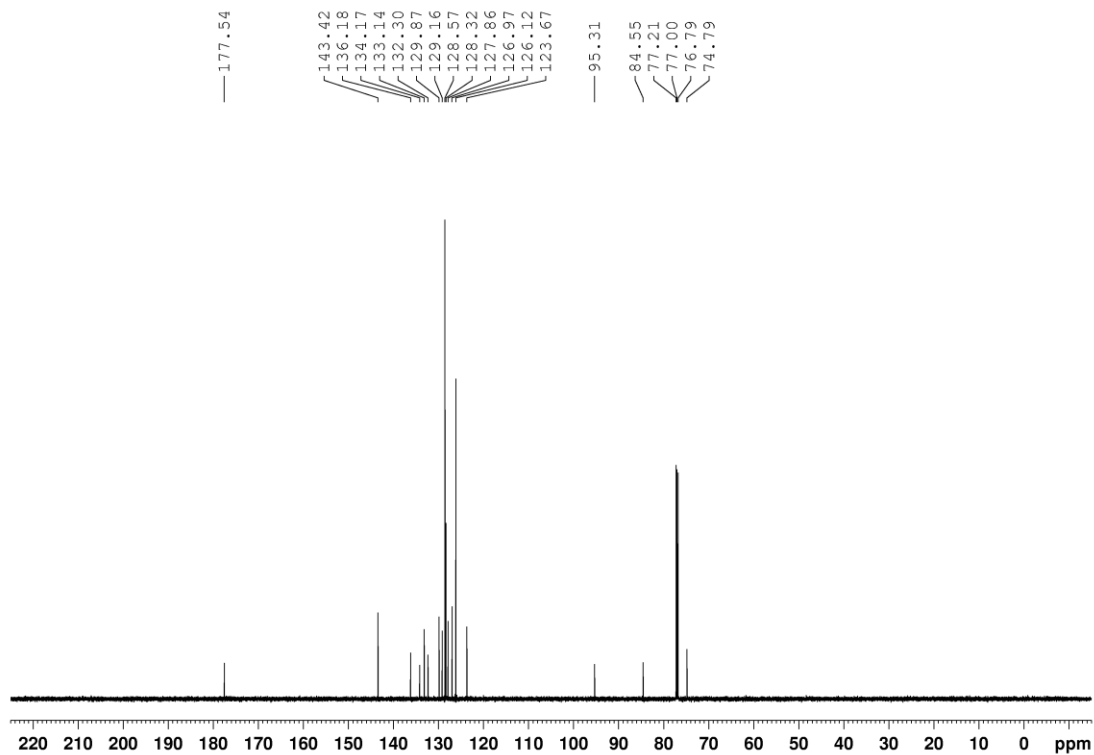

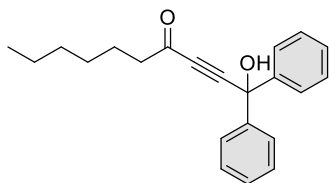

**1ar**

<sup>1</sup>H NMR spectrum was recorded on 400 MHz in CDCl<sub>3</sub>.

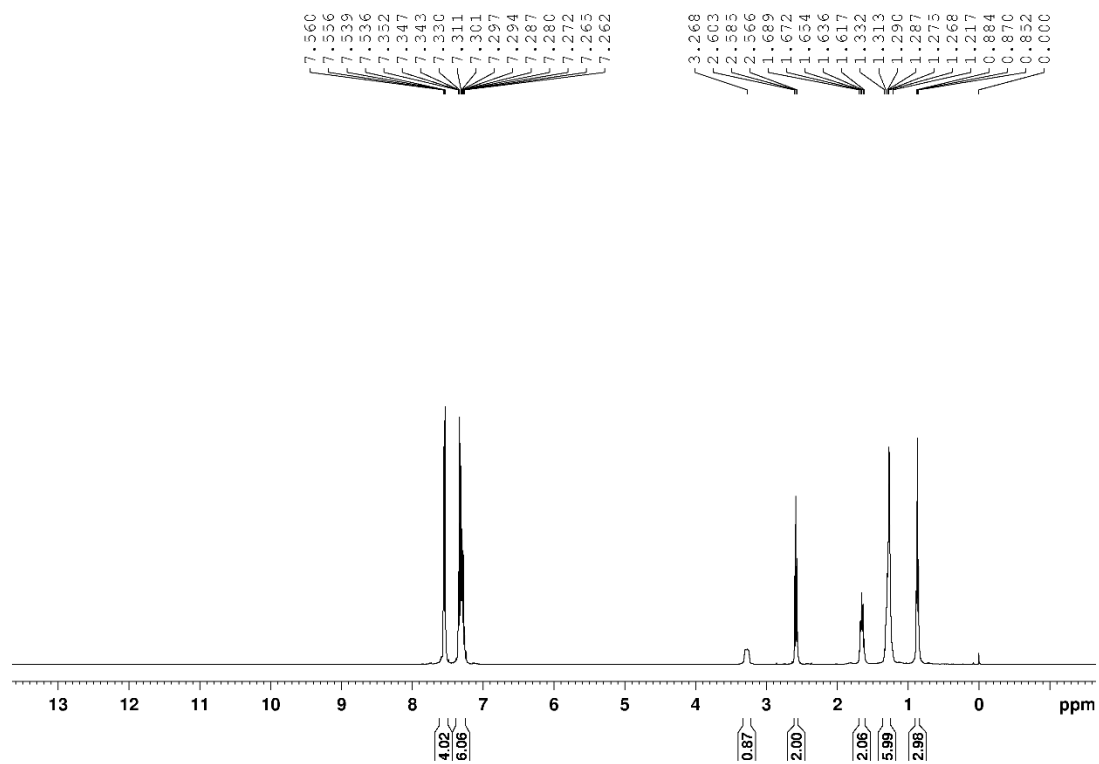

<sup>13</sup>C{<sup>1</sup>H} NMR spectrum was recorded on 151 MHz in CDCl<sub>3</sub>.

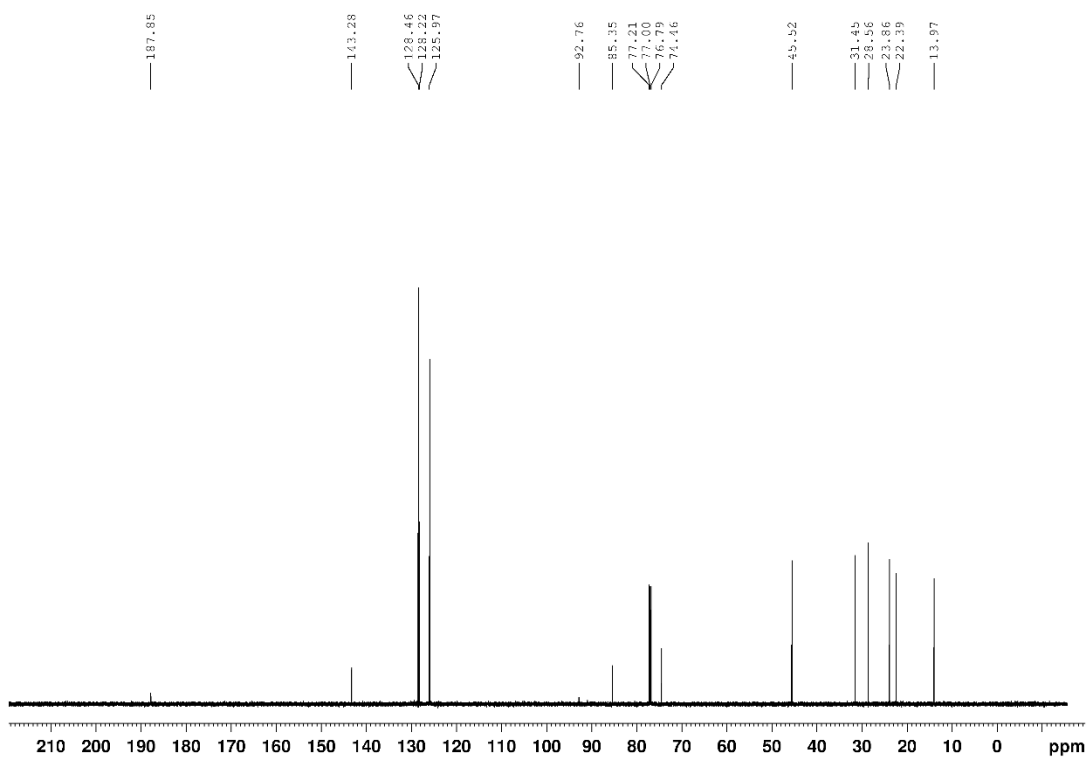

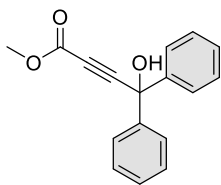

**1as**

<sup>1</sup>H NMR spectrum was recorded on 500 MHz in CDCl<sub>3</sub>.

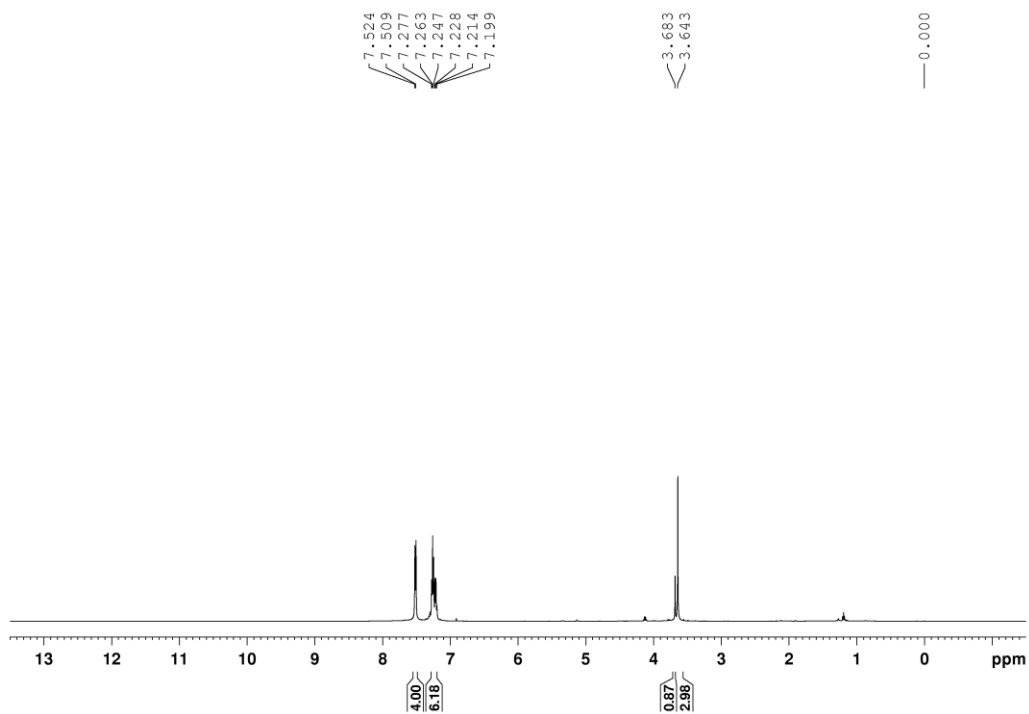

<sup>13</sup>C{<sup>1</sup>H} NMR spectrum was recorded on 126 MHz in CDCl<sub>3</sub>.

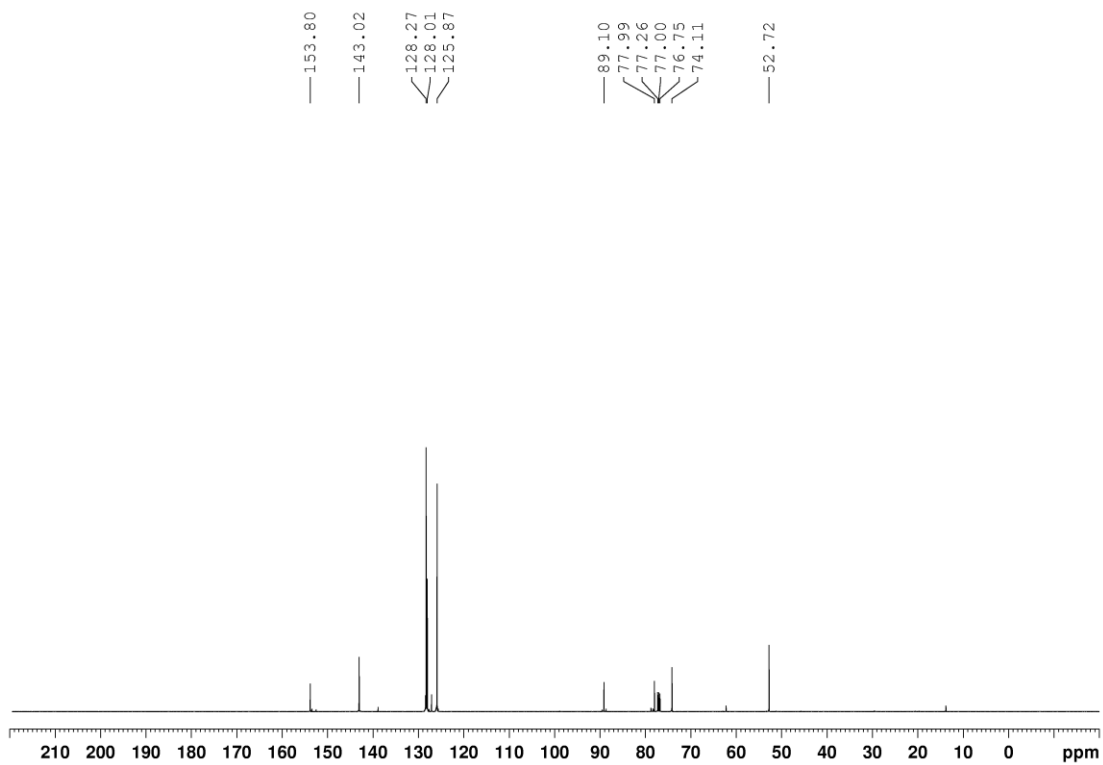

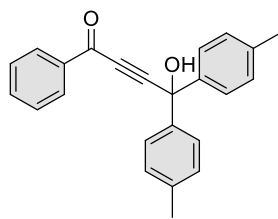

**1ba**

$^1\text{H}$  NMR spectrum was recorded on 600 MHz in  $\text{CDCl}_3$ .

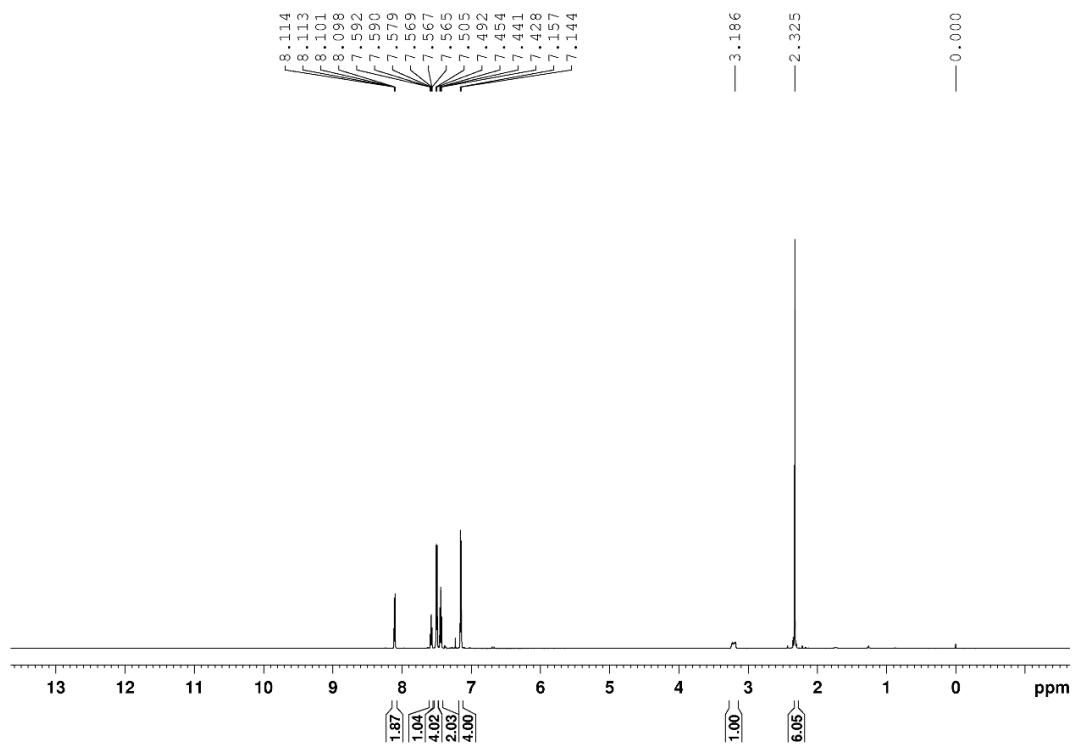

$^{13}\text{C}\{^1\text{H}\}$  NMR spectrum was recorded on 151 MHz in  $\text{CDCl}_3$ .

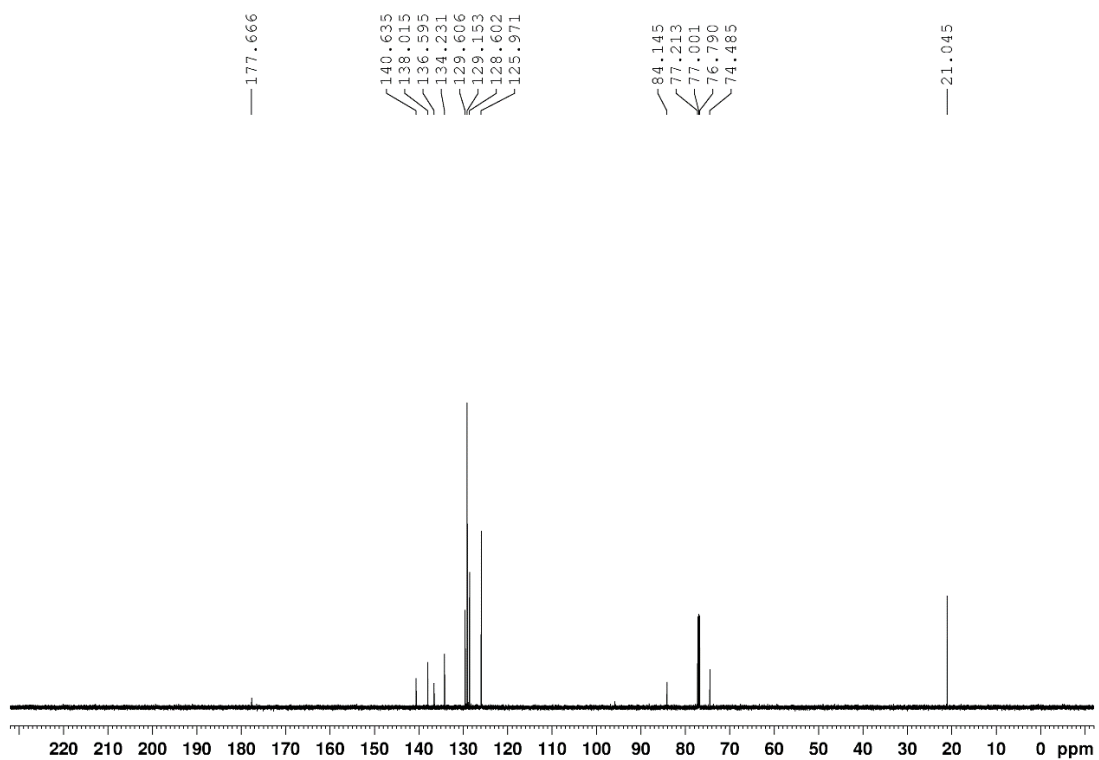

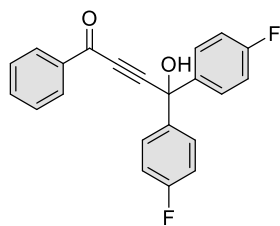

**1bb**

$^1\text{H}$  NMR spectrum was recorded on 400 MHz in  $\text{CDCl}_3$ .

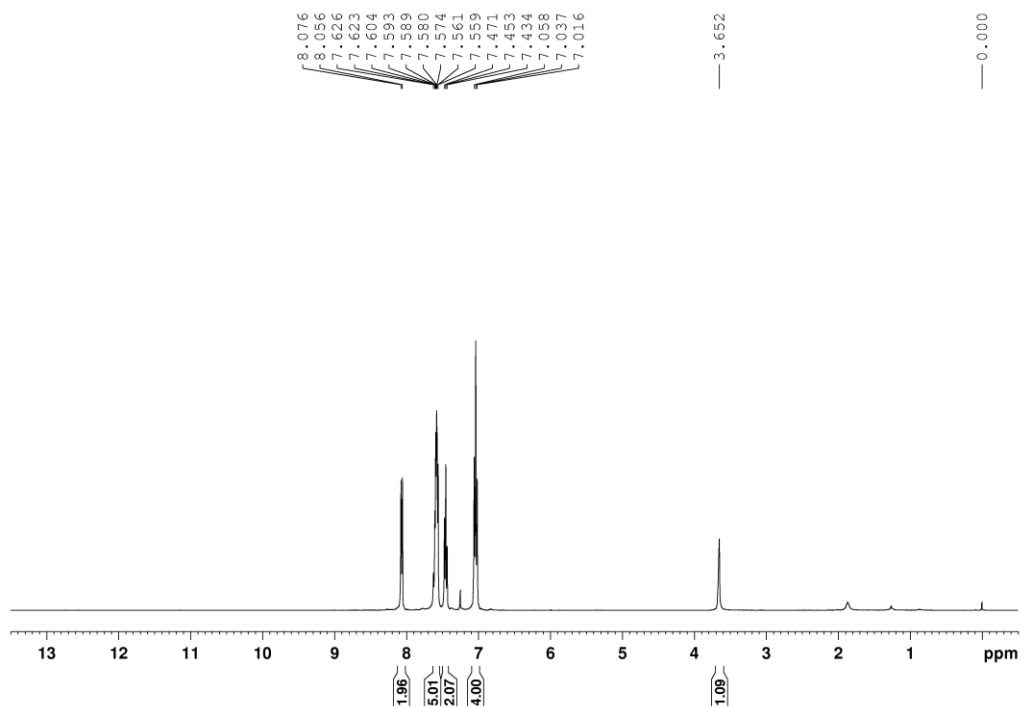

$^{13}\text{C}\{^1\text{H}\}$  NMR spectrum was recorded on 151 MHz in  $\text{CDCl}_3$ .

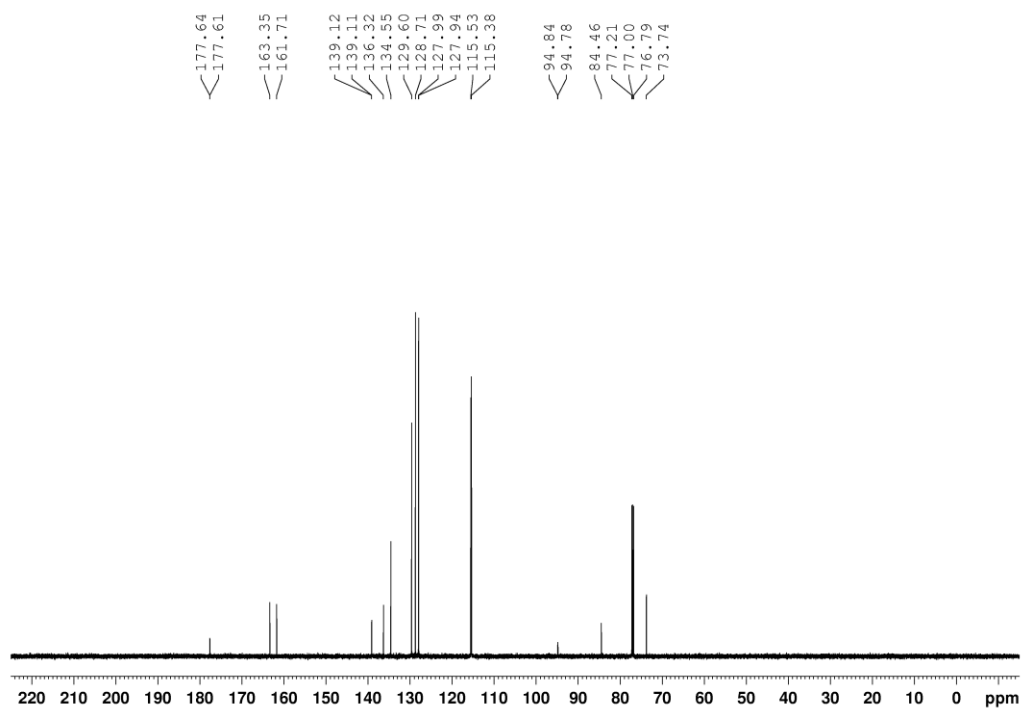



<sup>19</sup>F spectrum was recorded on 376 MHz in CDCl<sub>3</sub>.

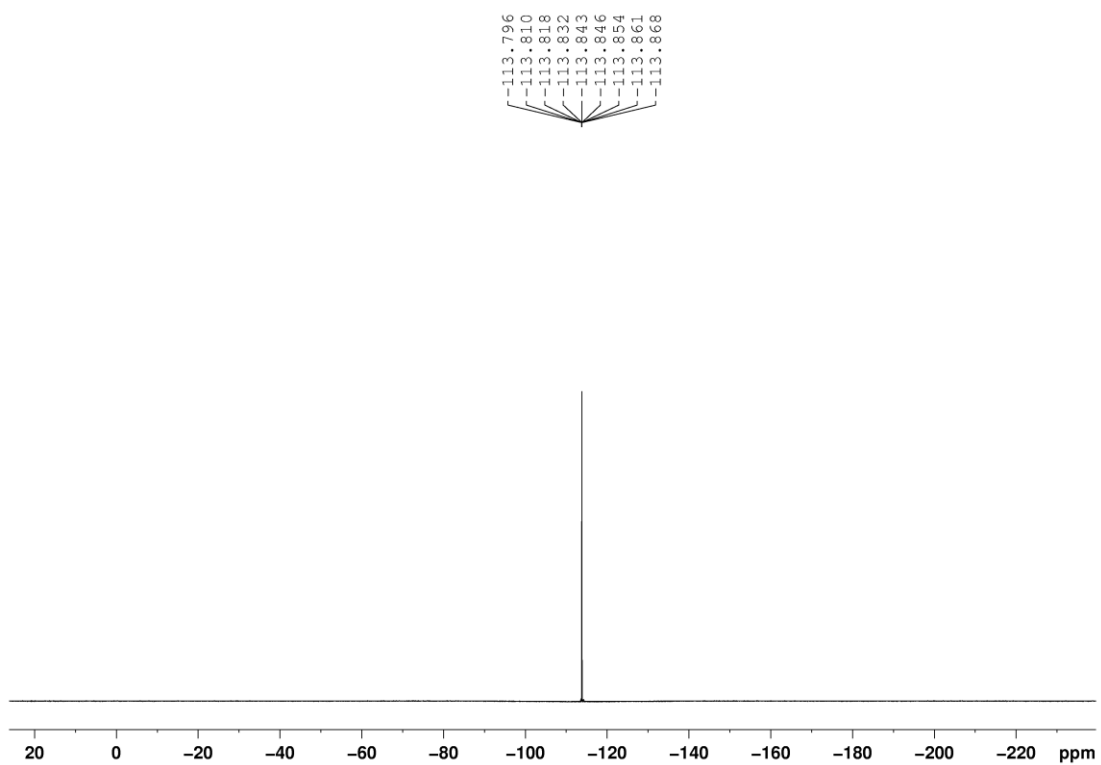

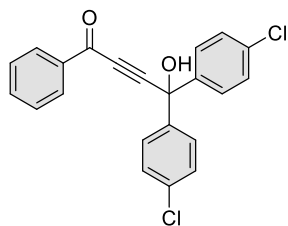

**1bc**

<sup>1</sup>H NMR spectrum was recorded on 600 MHz in CDCl<sub>3</sub>.

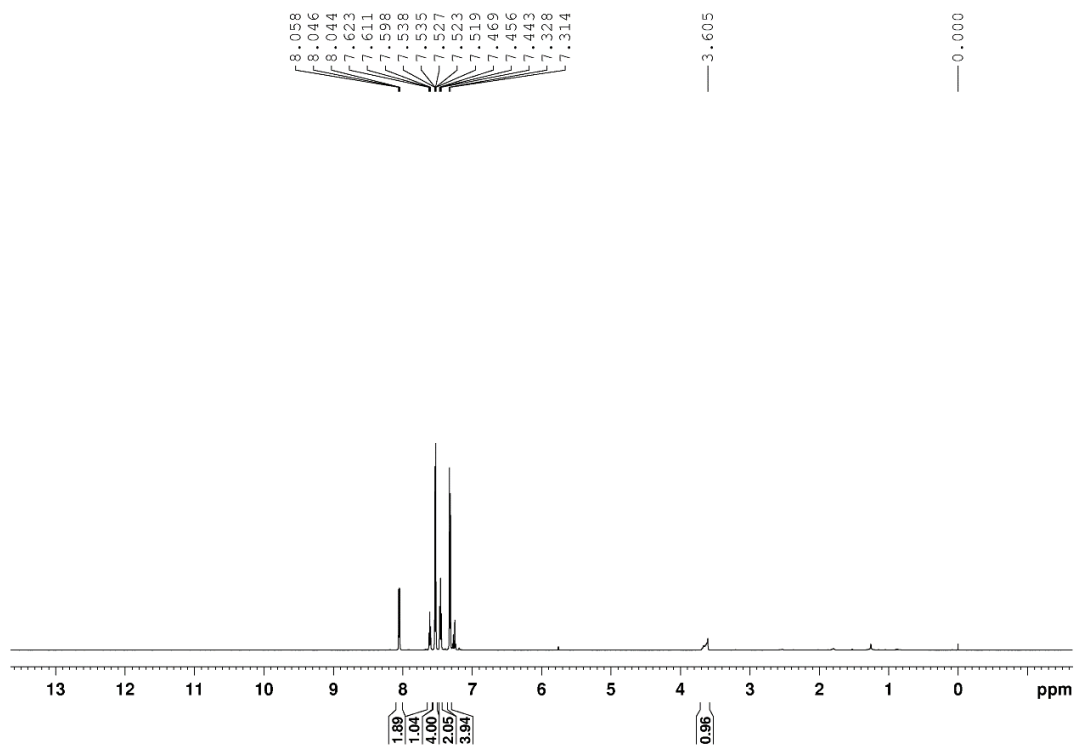

<sup>13</sup>C{<sup>1</sup>H} NMR spectrum was recorded on 151 MHz in CDCl<sub>3</sub>.

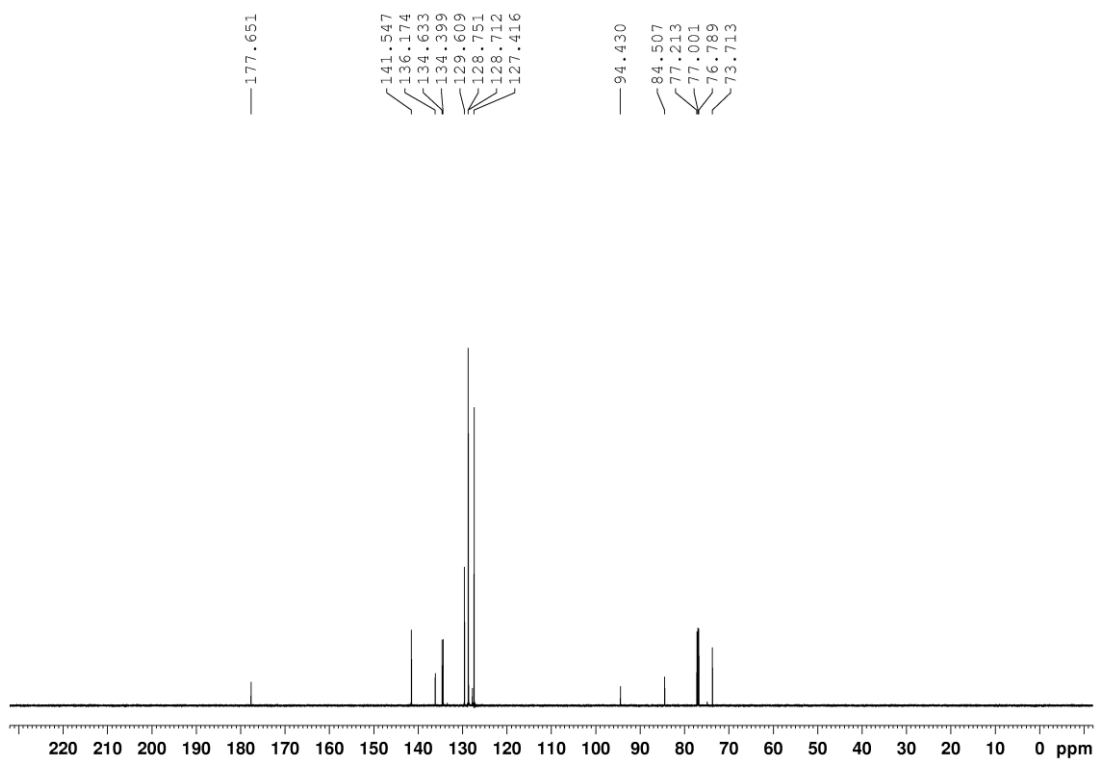

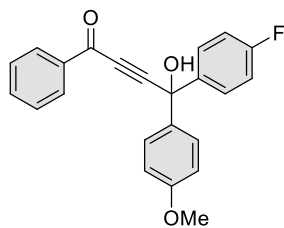

**1bd**

$^1\text{H}$  NMR spectrum was recorded on 400 MHz in  $\text{CDCl}_3$ .

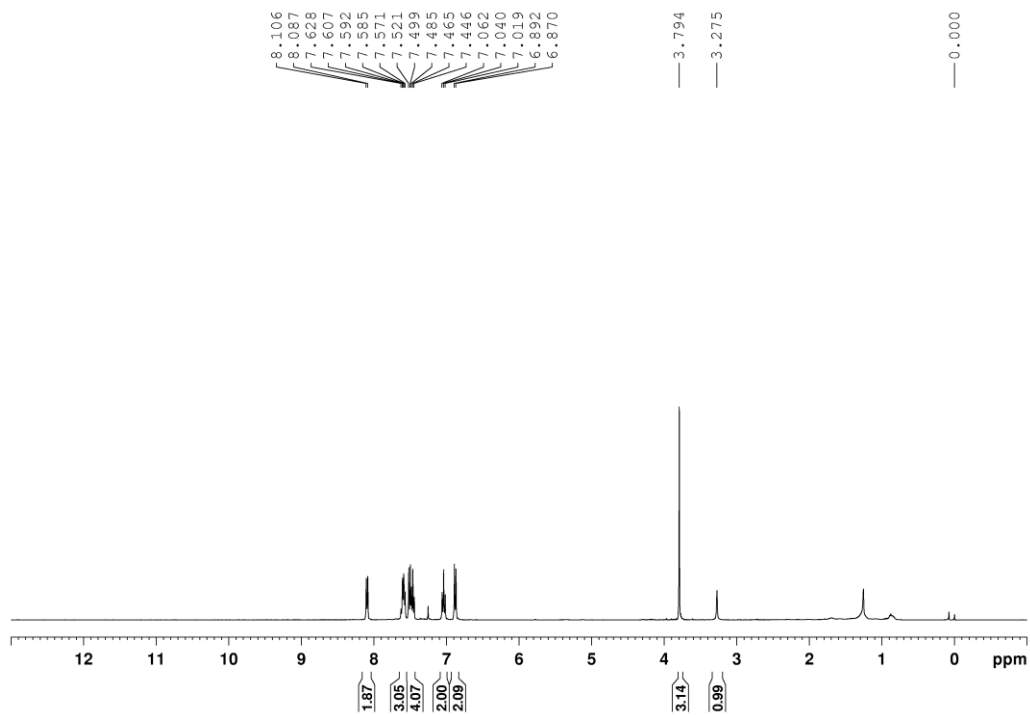

$^{13}\text{C}\{^1\text{H}\}$  NMR spectrum was recorded on 151 MHz in  $\text{CDCl}_3$ .

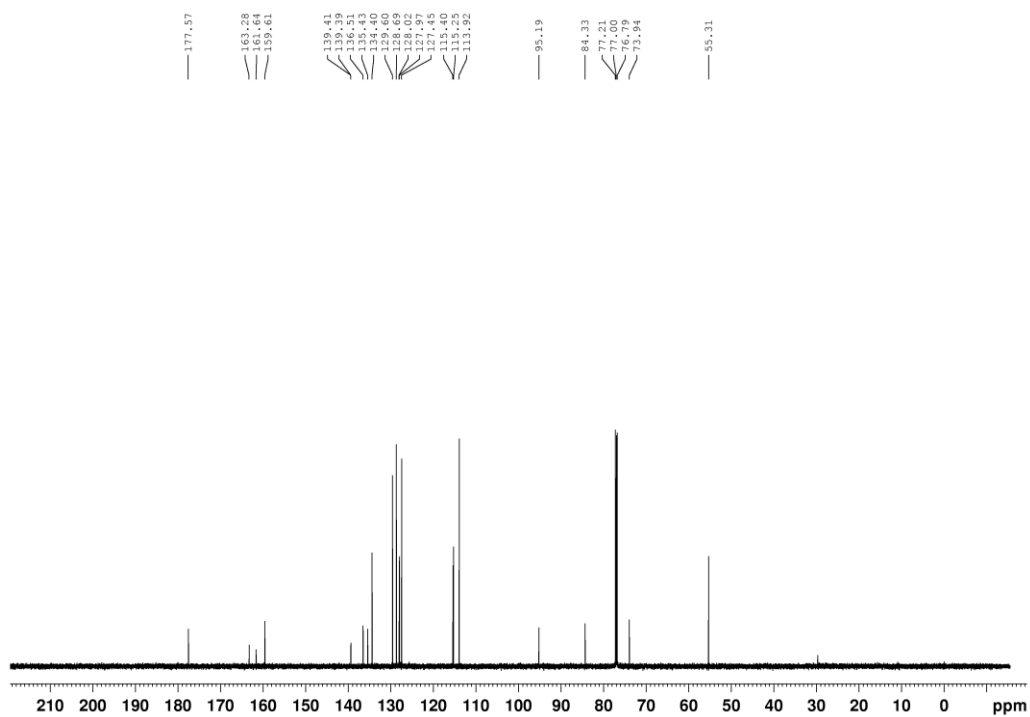

<sup>19</sup>F spectrum was recorded on 376 MHz in CDCl<sub>3</sub>.

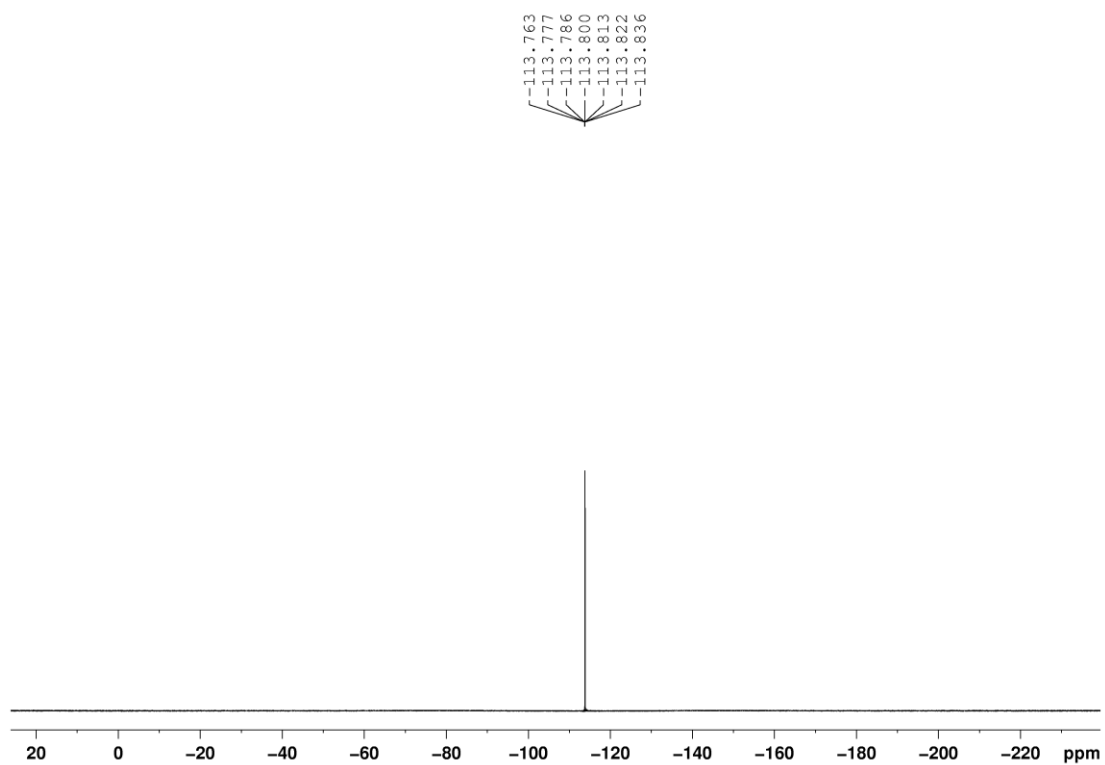

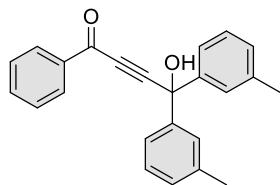

**1be**

$^1\text{H}$  NMR spectrum was recorded on 400 MHz in  $\text{CDCl}_3$ .

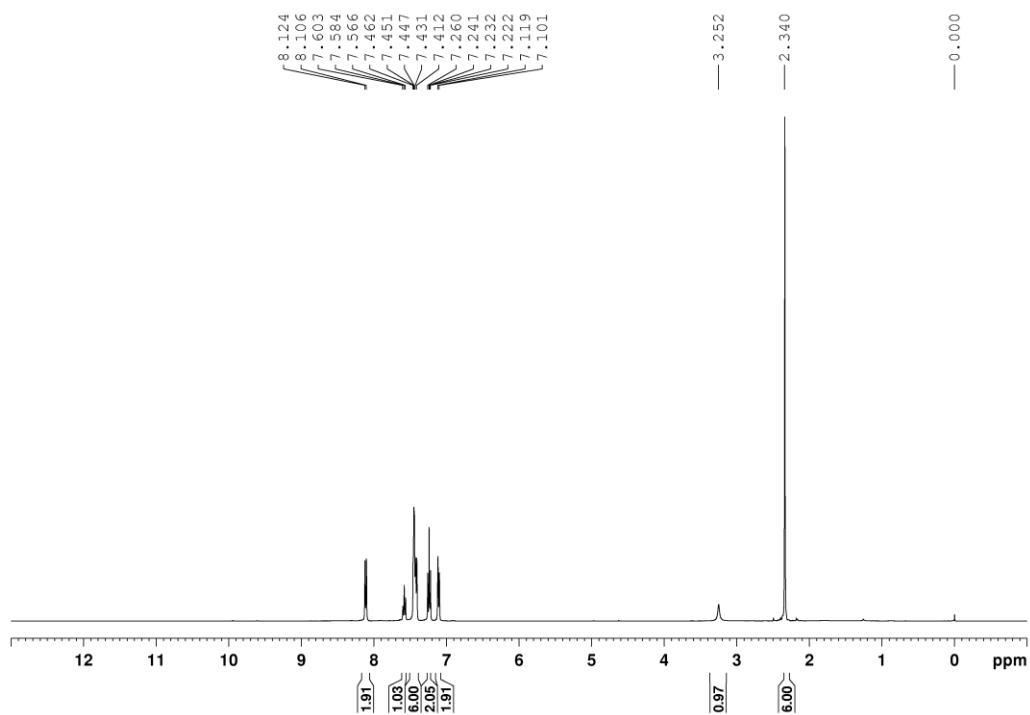

$^{13}\text{C}\{^1\text{H}\}$  NMR spectrum was recorded on 151 MHz in  $\text{CDCl}_3$ .

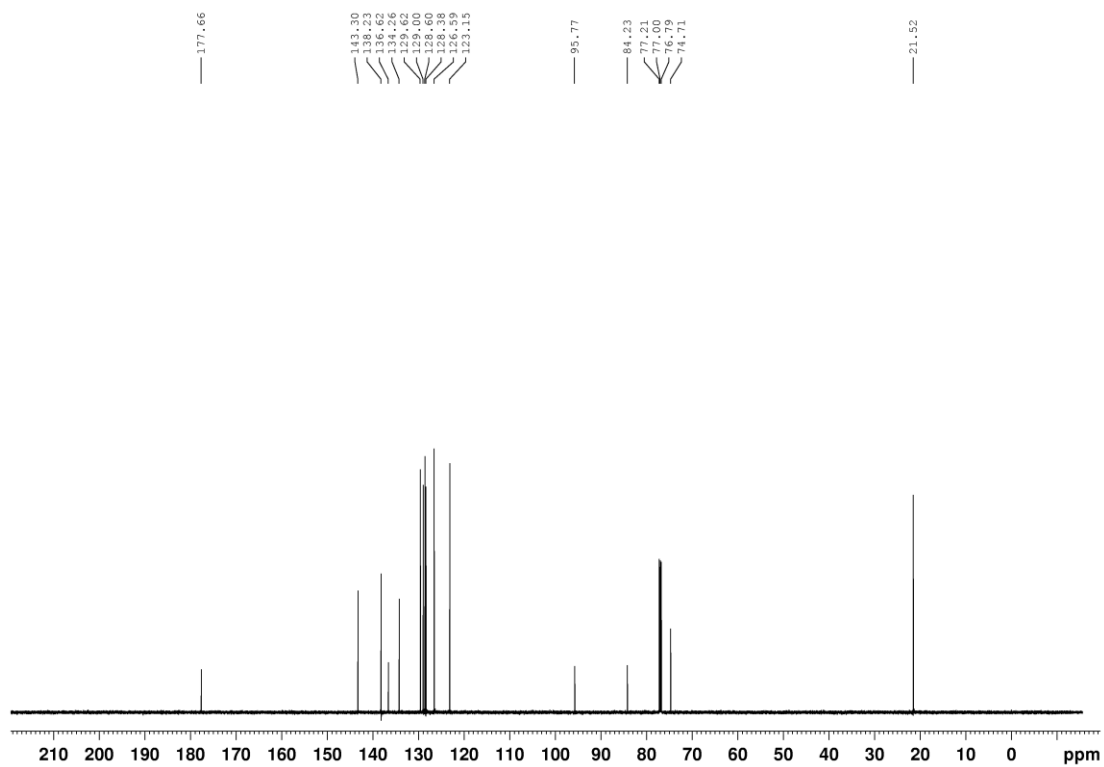

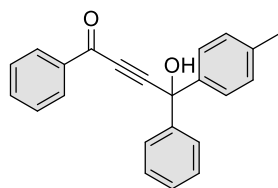

**1bf**

$^1\text{H}$  NMR spectrum was recorded on 400 MHz in  $\text{CDCl}_3$ .

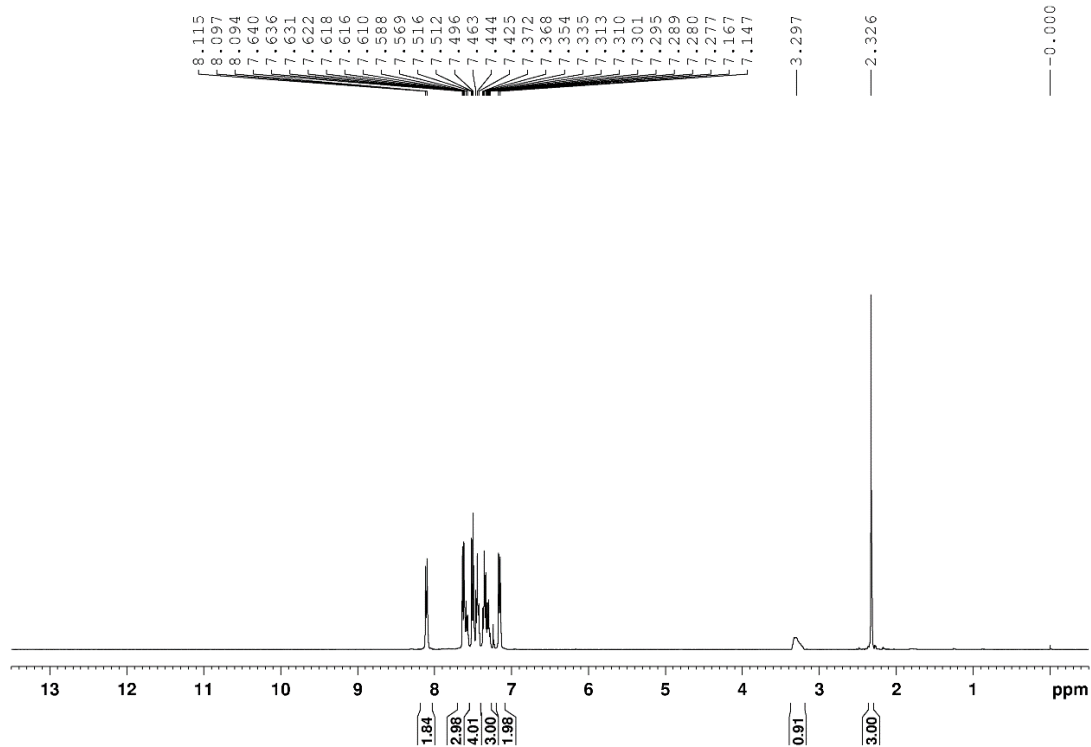

$^{13}\text{C}\{^1\text{H}\}$  NMR spectrum was recorded on 151 MHz in  $\text{CDCl}_3$ .

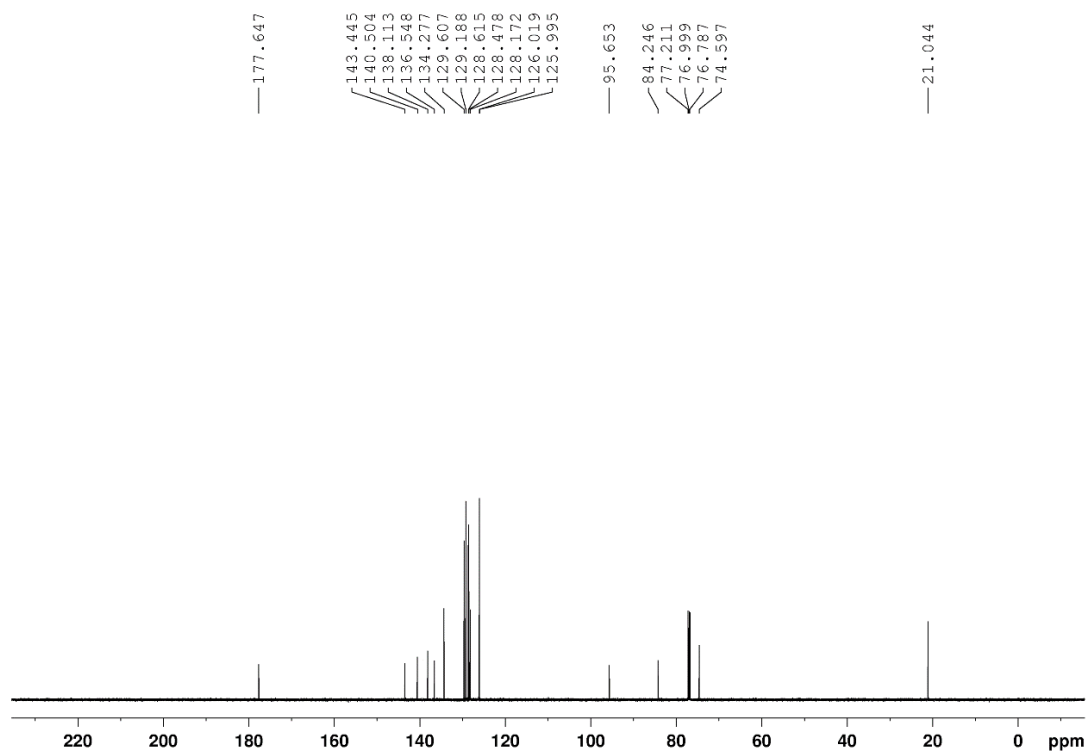

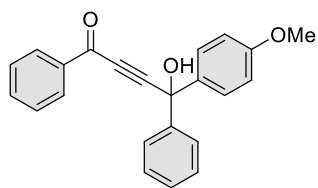

**1bg**

$^1\text{H}$  NMR spectrum was recorded on 400 MHz in  $\text{CDCl}_3$ .

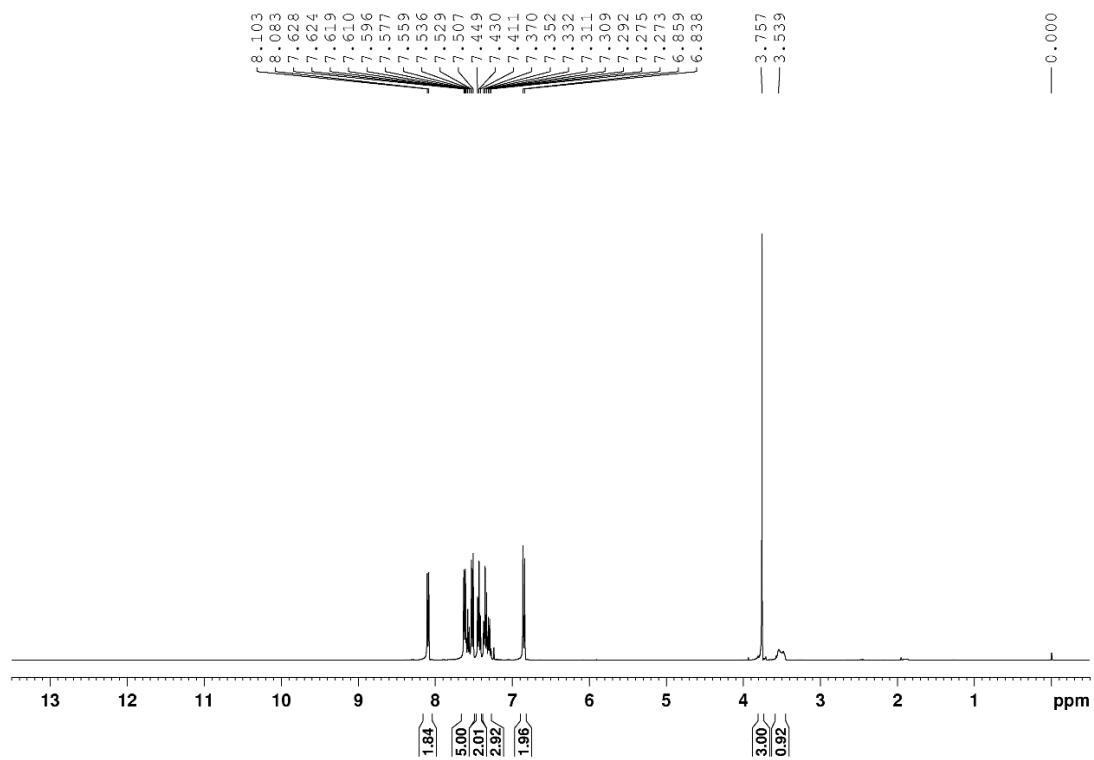

$^{13}\text{C}\{^1\text{H}\}$  NMR spectrum was recorded on 151 MHz in  $\text{CDCl}_3$ .

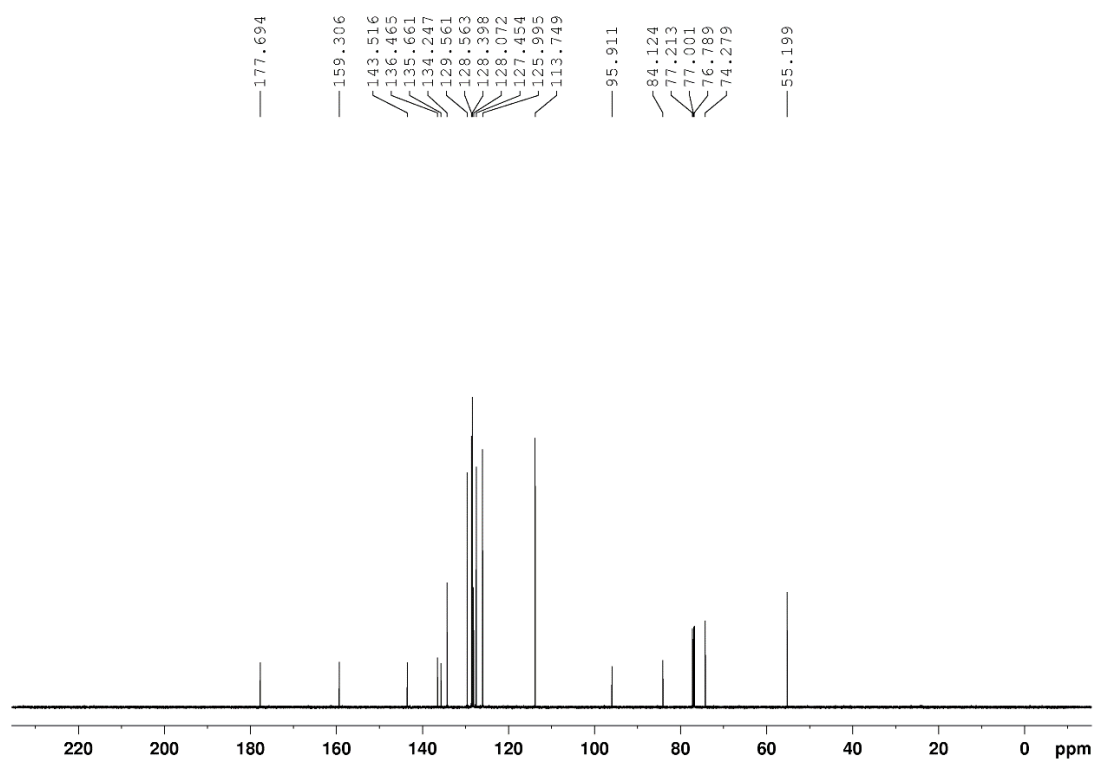

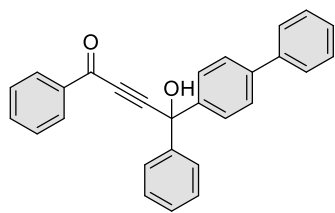

**1bh**

<sup>1</sup>H NMR spectrum was recorded on 400 MHz in CDCl<sub>3</sub>.

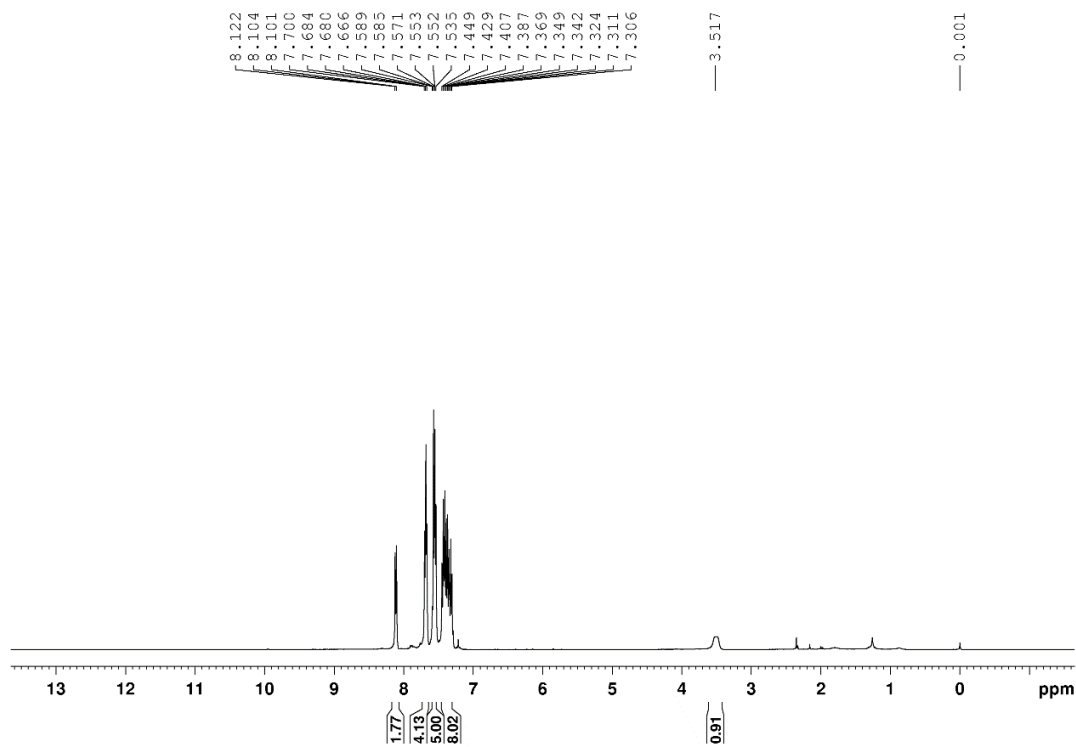

<sup>13</sup>C{<sup>1</sup>H} NMR spectrum was recorded on 151 MHz in CDCl<sub>3</sub>.

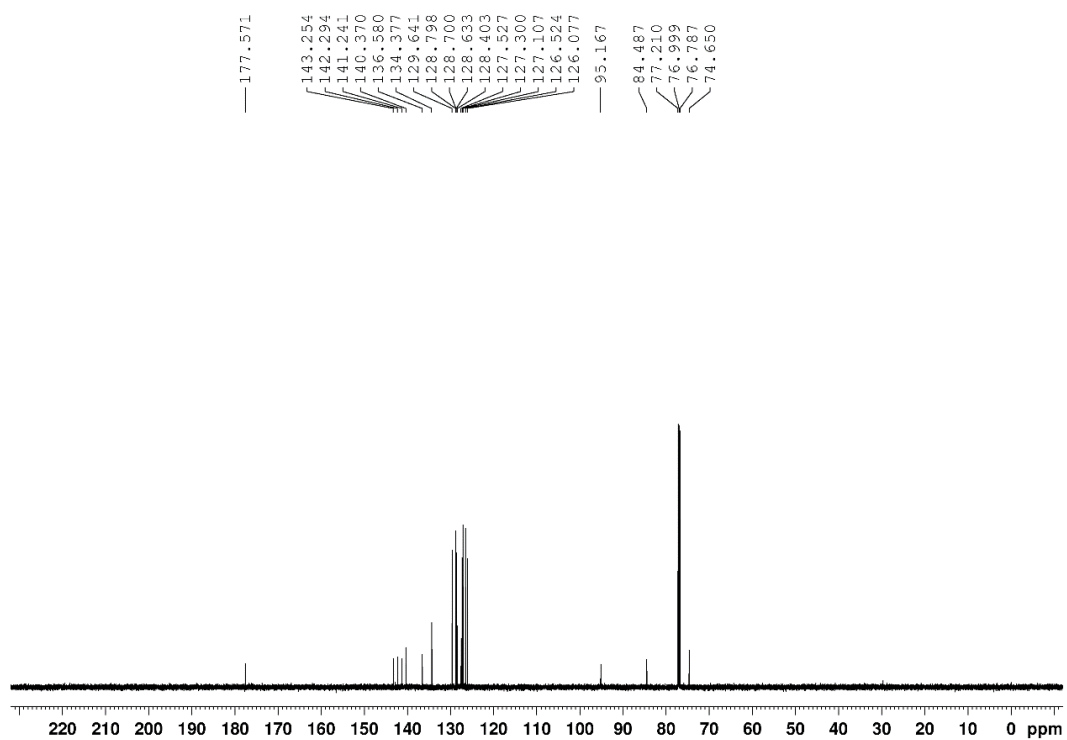



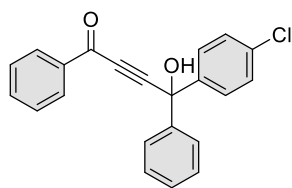

**1bi**

$^1\text{H}$  NMR spectrum was recorded on 400 MHz in  $\text{CDCl}_3$ .

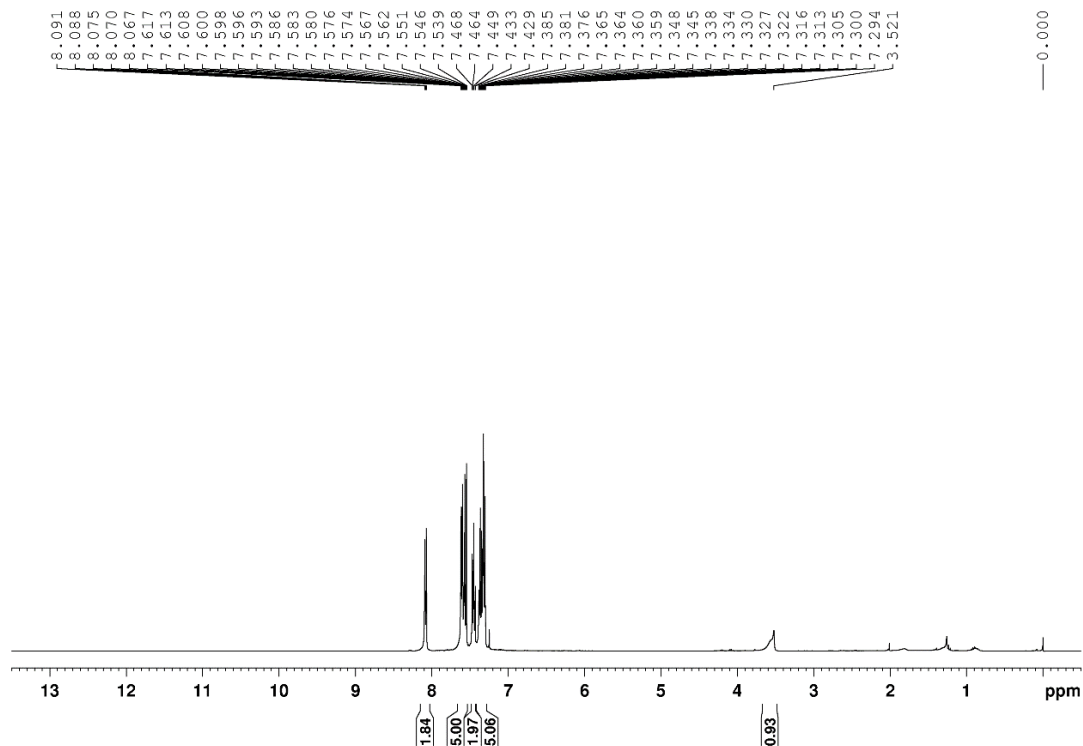

$^{13}\text{C}\{^1\text{H}\}$  NMR spectrum was recorded on 151 MHz in  $\text{CDCl}_3$ .

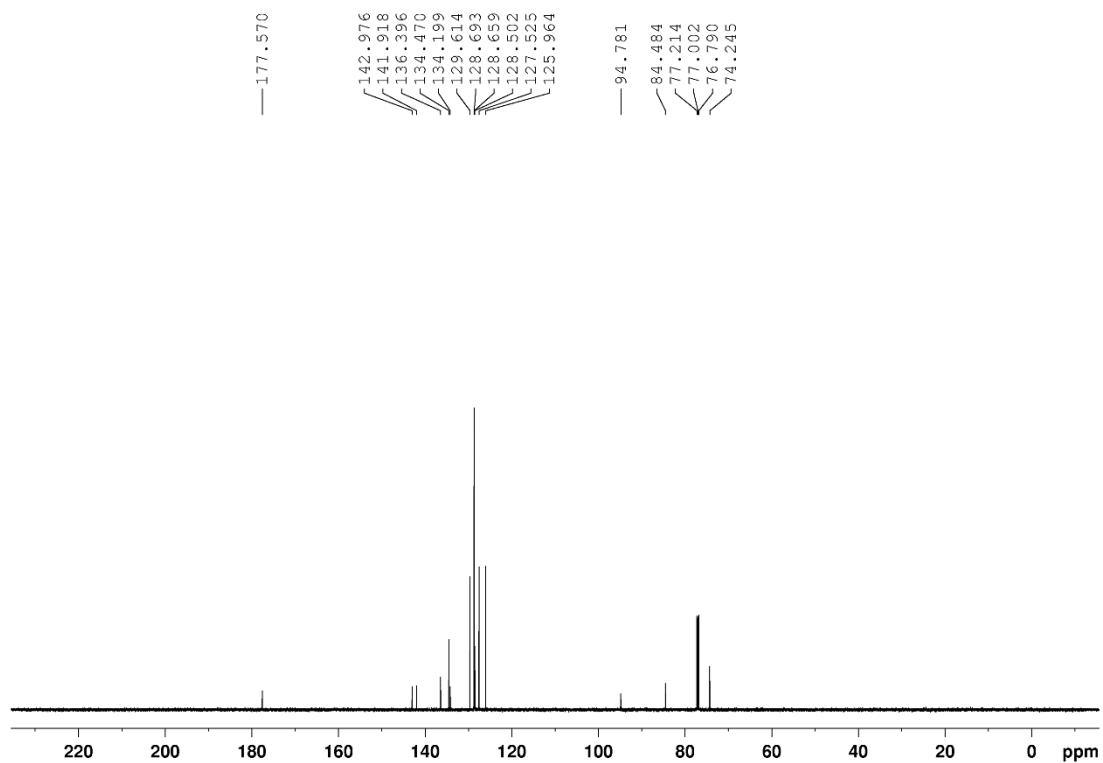

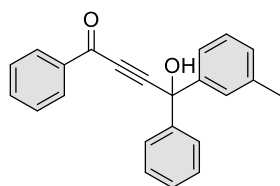

**1bj**

$^1\text{H}$  NMR spectrum was recorded on 400 MHz in  $\text{CDCl}_3$ .

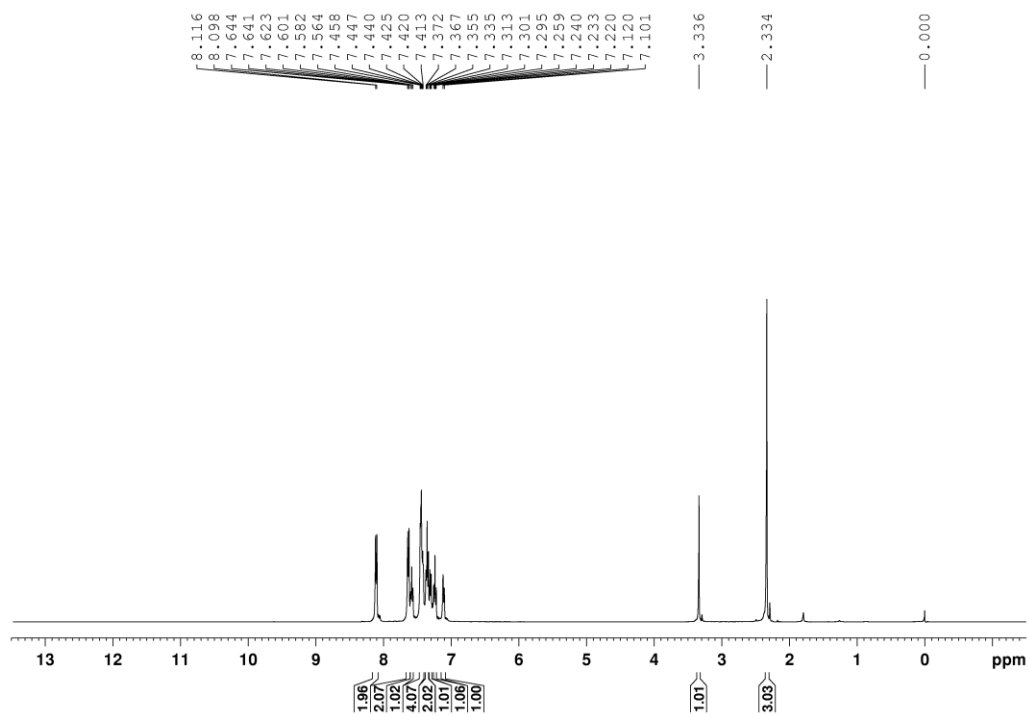

$^{13}\text{C}\{^1\text{H}\}$  NMR spectrum was recorded on 151 MHz in  $\text{CDCl}_3$ .

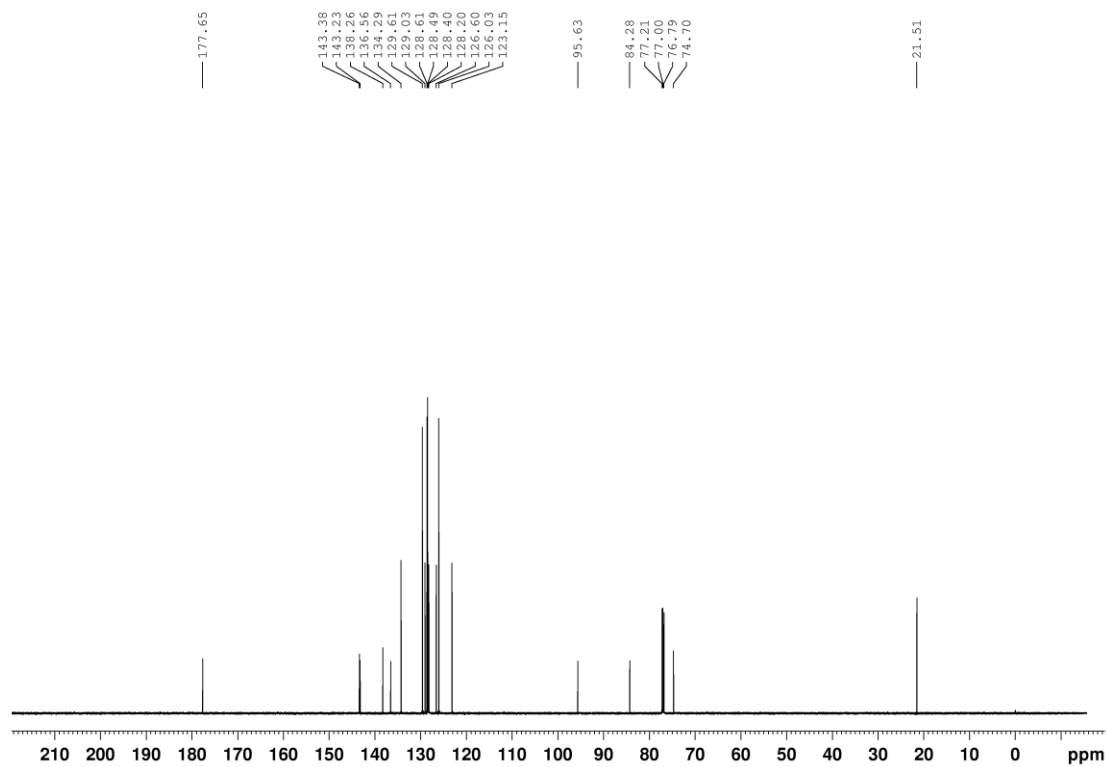

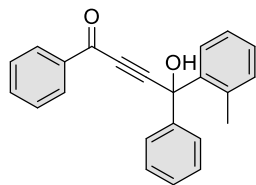

**1bk**

$^1\text{H}$  NMR spectrum was recorded on 400 MHz in  $\text{CDCl}_3$ .

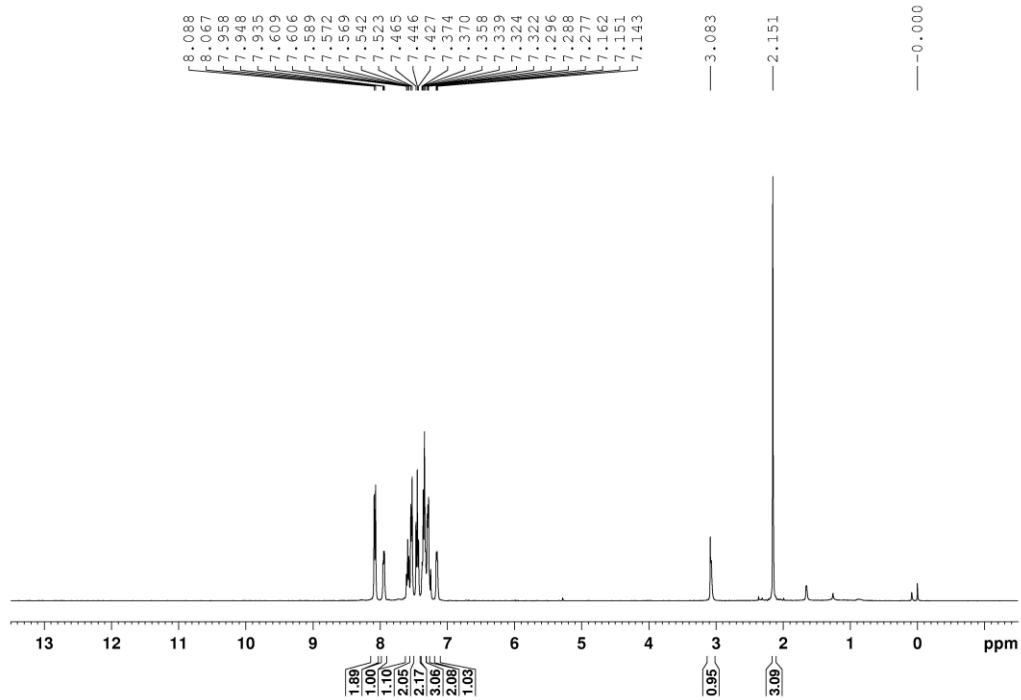

$^{13}\text{C}\{^1\text{H}\}$  NMR spectrum was recorded on 151 MHz in  $\text{CDCl}_3$ .

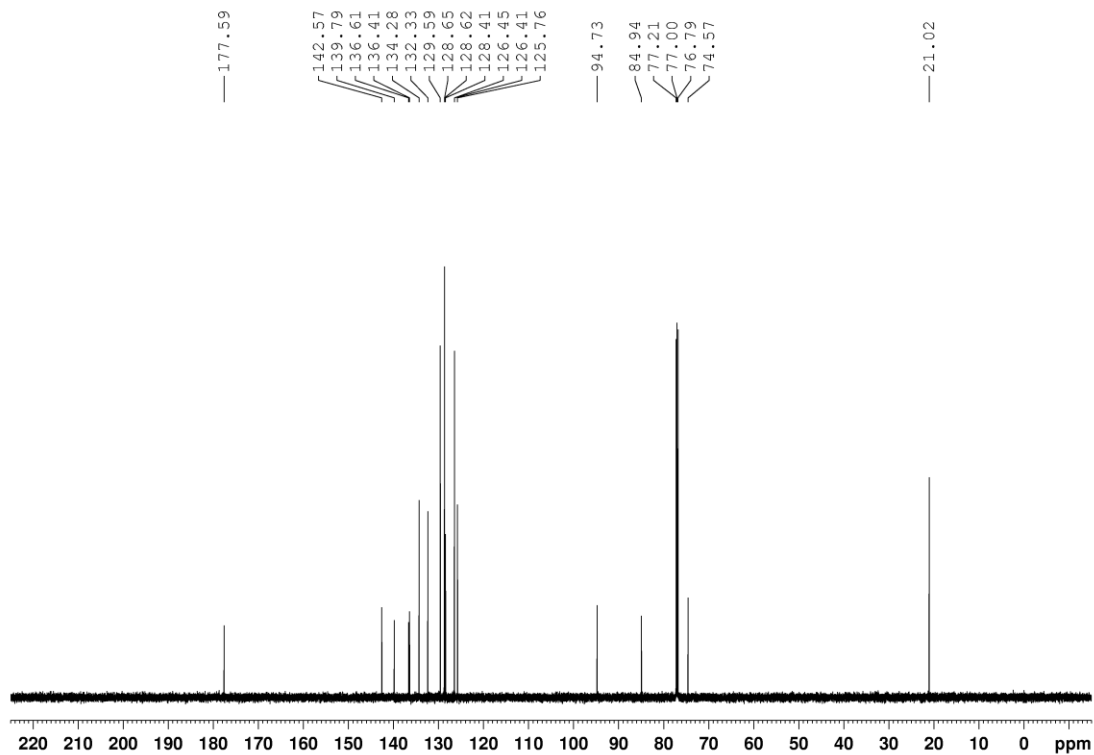

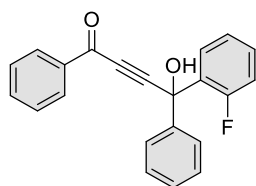

**1bl**

$^1\text{H}$  NMR spectrum was recorded on 400 MHz in  $\text{CDCl}_3$ .

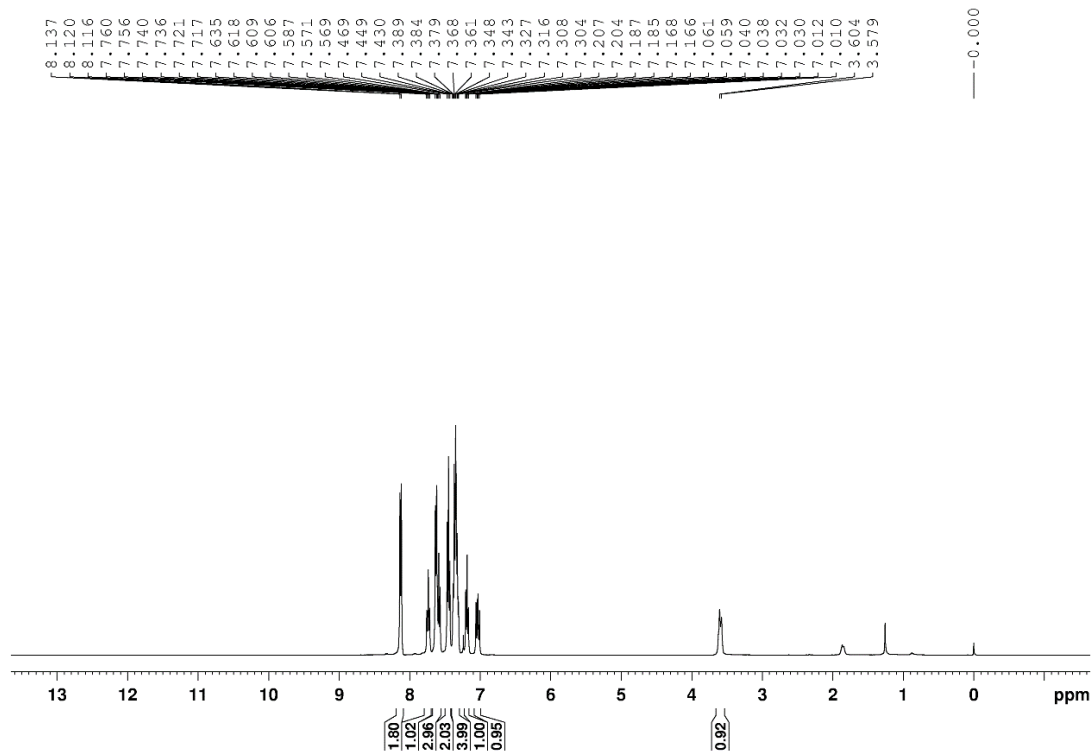

$^{13}\text{C}\{^1\text{H}\}$  NMR spectrum was recorded on 151 MHz in  $\text{CDCl}_3$ .

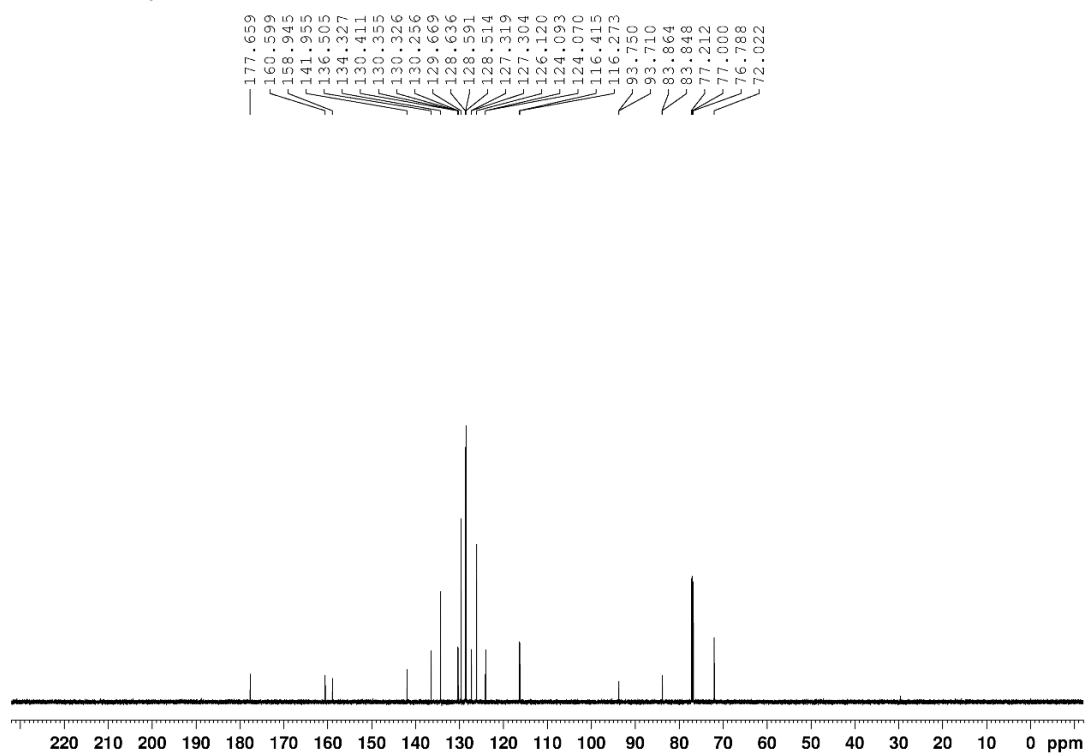

$^{19}\text{F}$  spectrum was recorded on 376 MHz in  $\text{CDCl}_3$ .

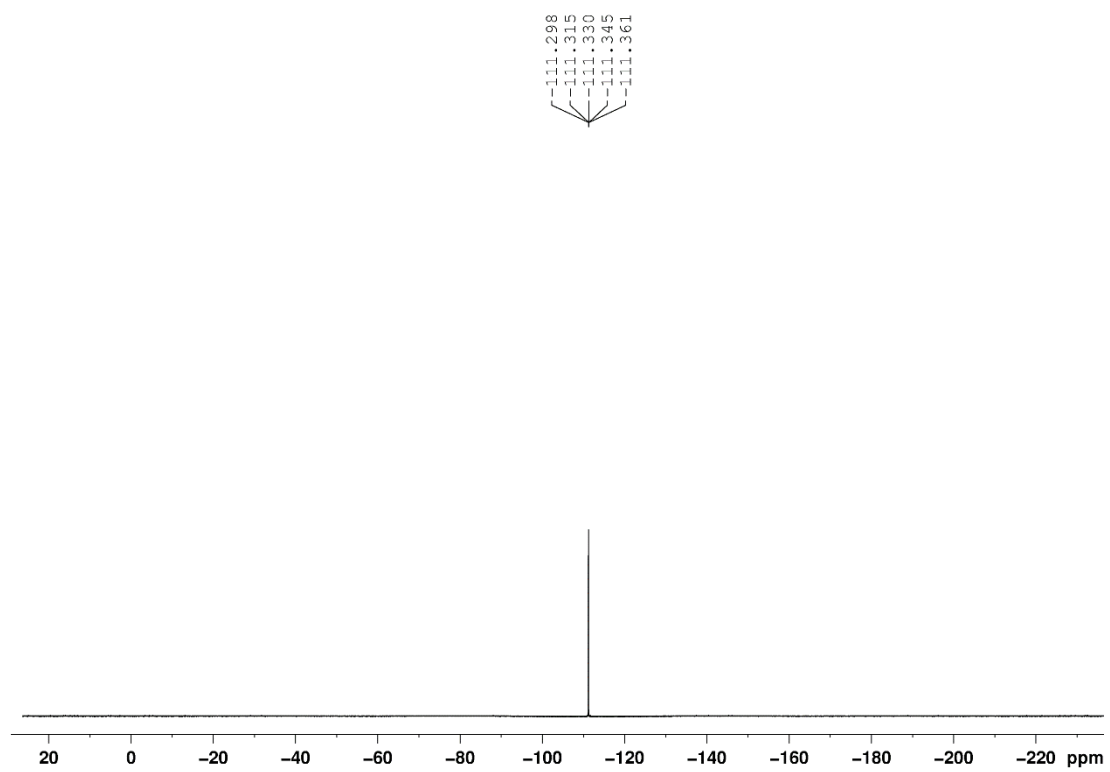

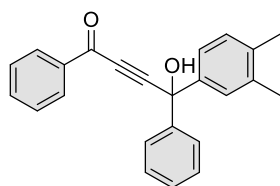

**1bm**

$^1\text{H}$  NMR spectrum was recorded on 400 MHz in  $\text{CDCl}_3$ .

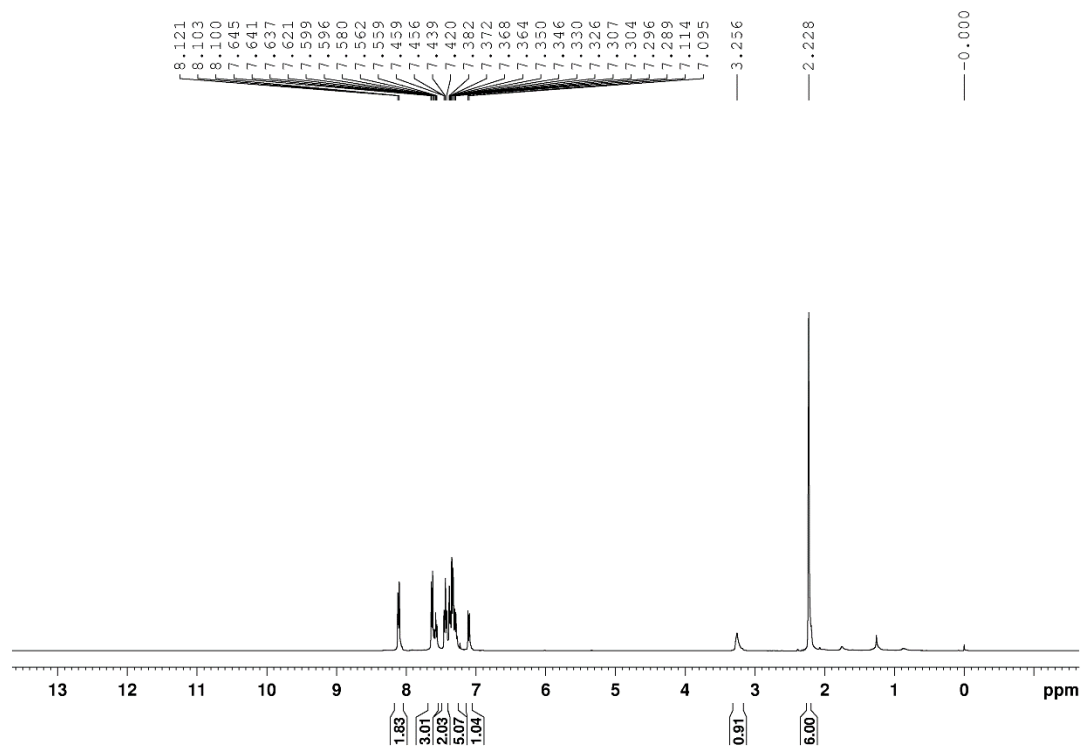

$^{13}\text{C}\{\text{H}\}$  NMR spectrum was recorded on 151 MHz in  $\text{CDCl}_3$ .

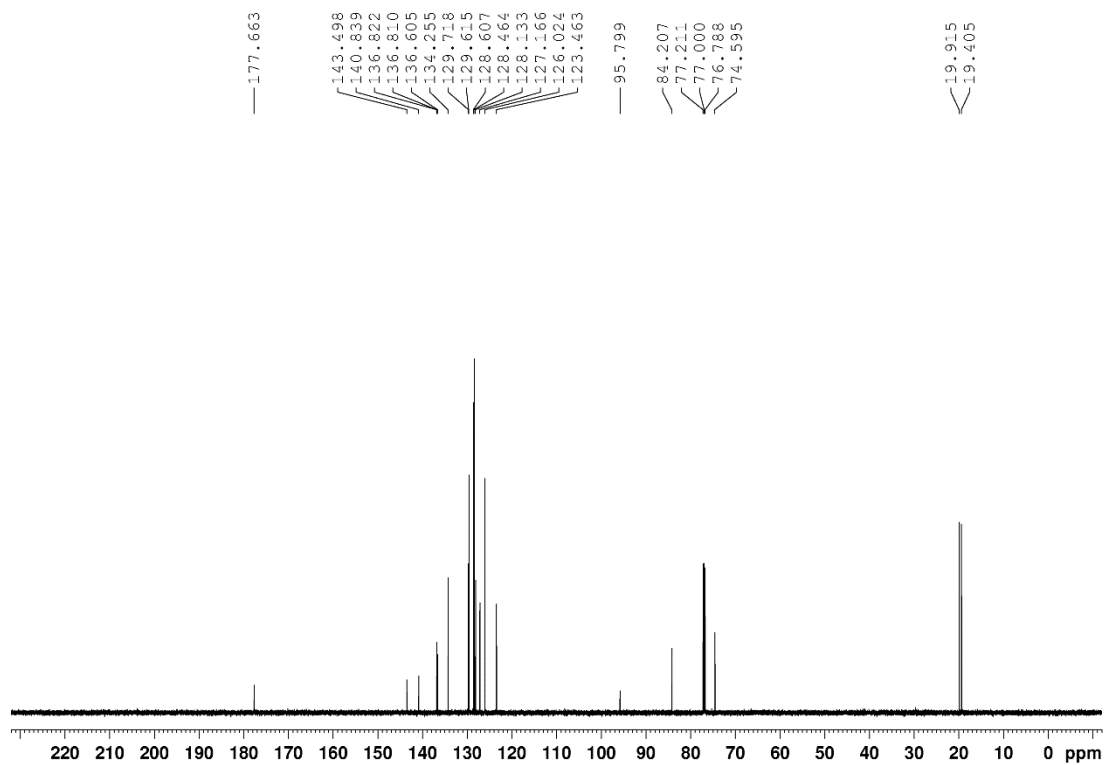

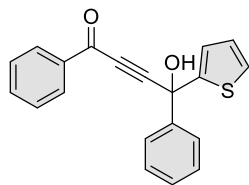

**1bn**

<sup>1</sup>H NMR spectrum was recorded on 400 MHz in CDCl<sub>3</sub>.

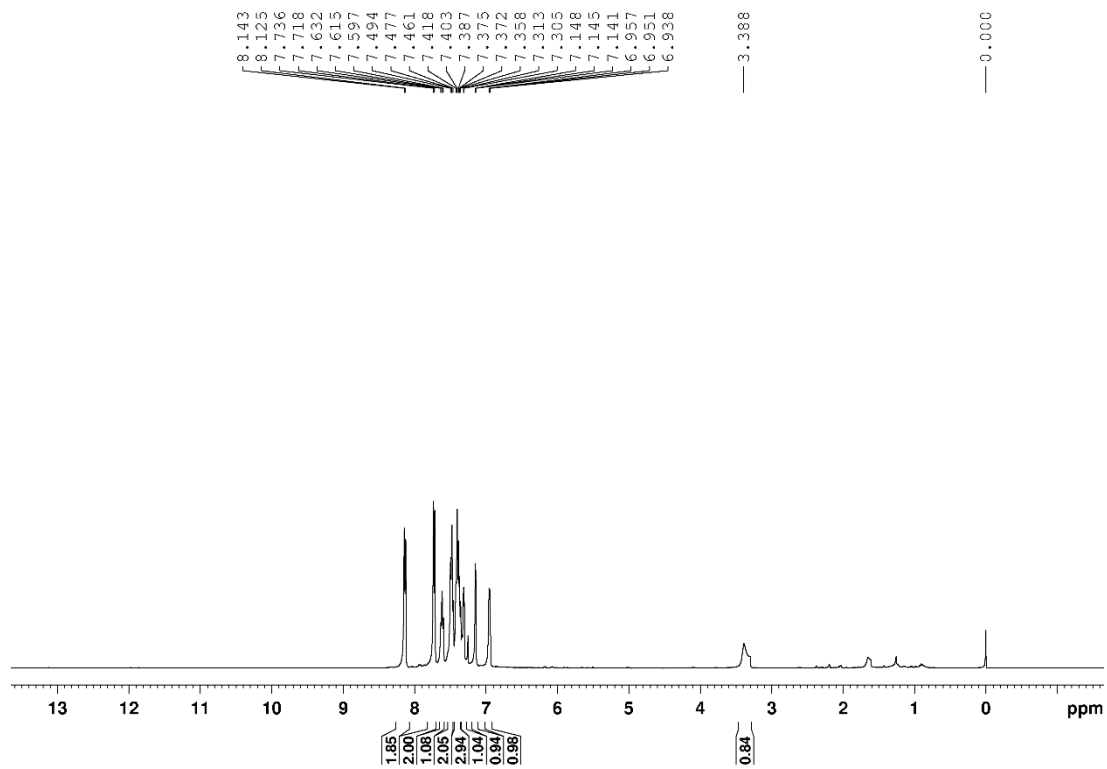

<sup>13</sup>C{H} NMR spectrum was recorded on 151 MHz in CDCl<sub>3</sub>.

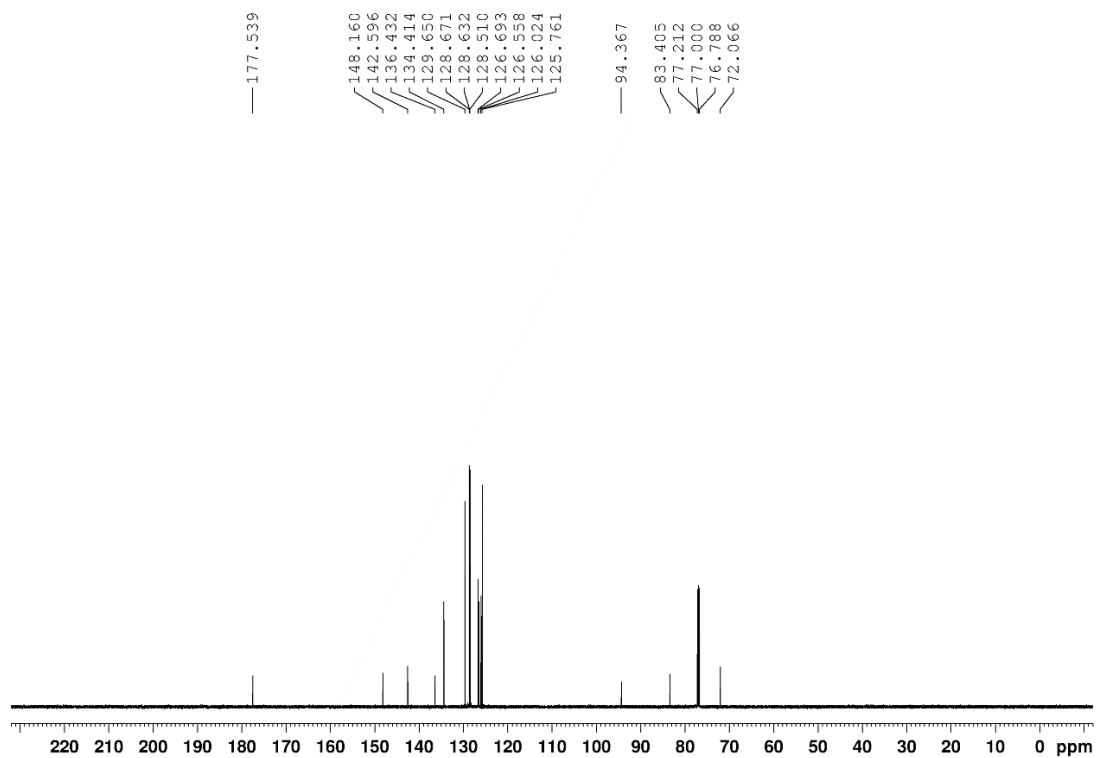

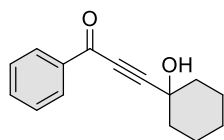

**1bo**

$^1\text{H}$  NMR spectrum was recorded on 400 MHz in  $\text{CDCl}_3$ .

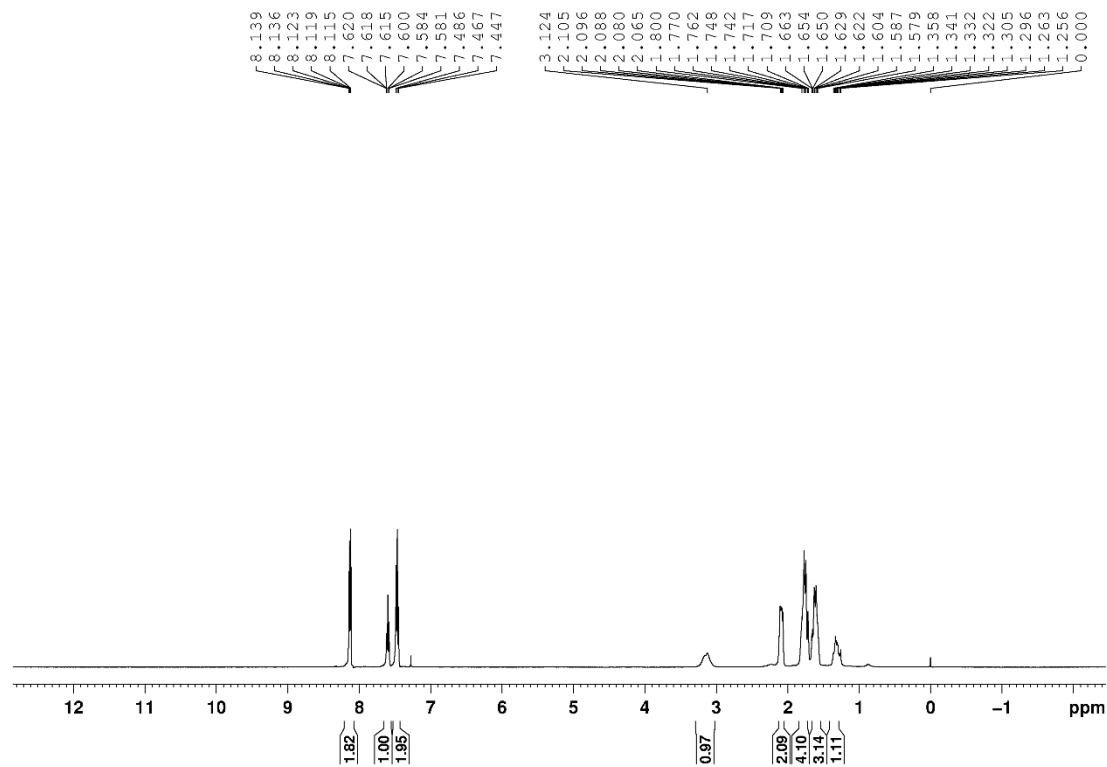

$^{13}\text{C}\{^1\text{H}\}$  NMR spectrum was recorded on 151 MHz in  $\text{CDCl}_3$ .

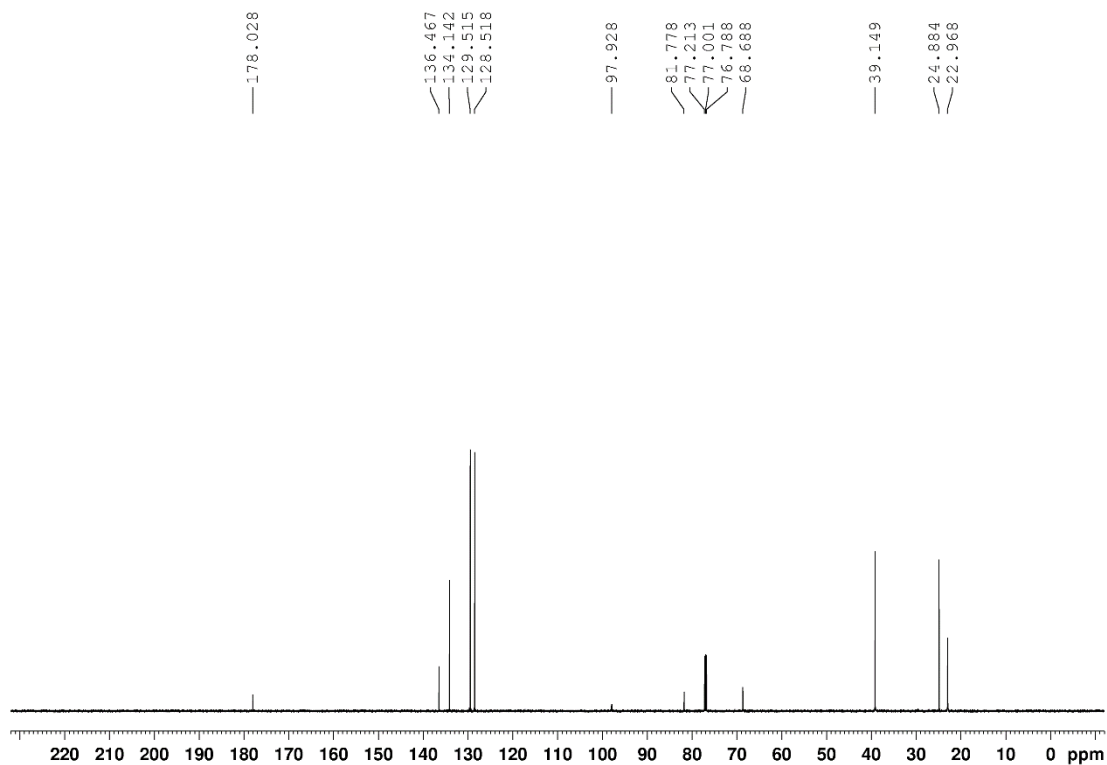



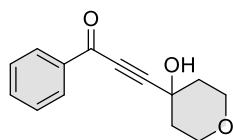

**1bp**

$^1\text{H}$  NMR spectrum was recorded on 400 MHz in  $\text{CDCl}_3$ .

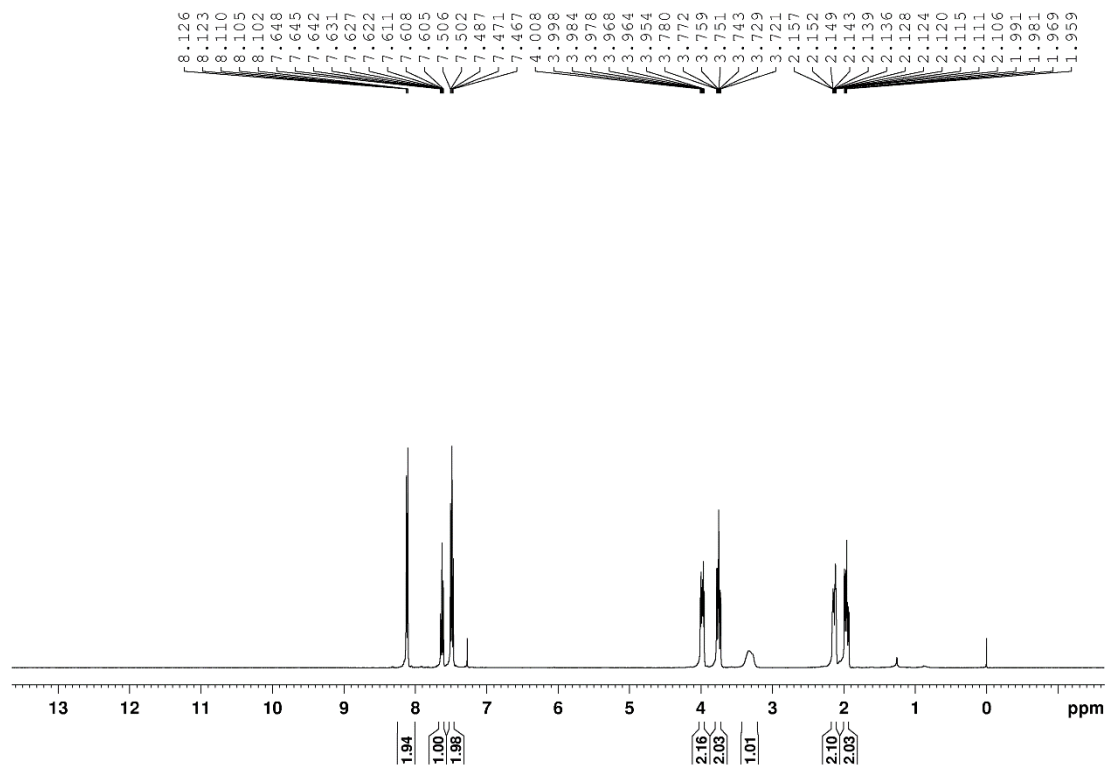

$^{13}\text{C}\{^1\text{H}\}$  NMR spectrum was recorded on 151 MHz in  $\text{CDCl}_3$ .

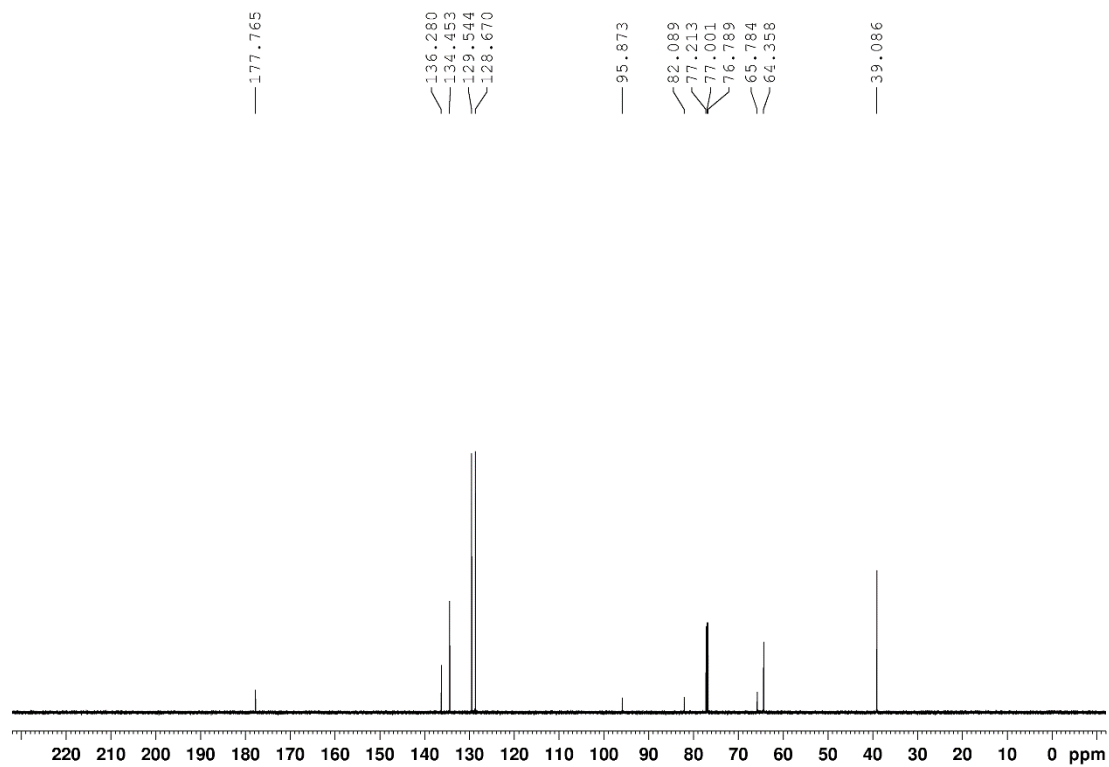

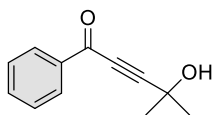

**1bq**

$^1\text{H}$  NMR spectrum was recorded on 400 MHz in  $\text{CDCl}_3$ .

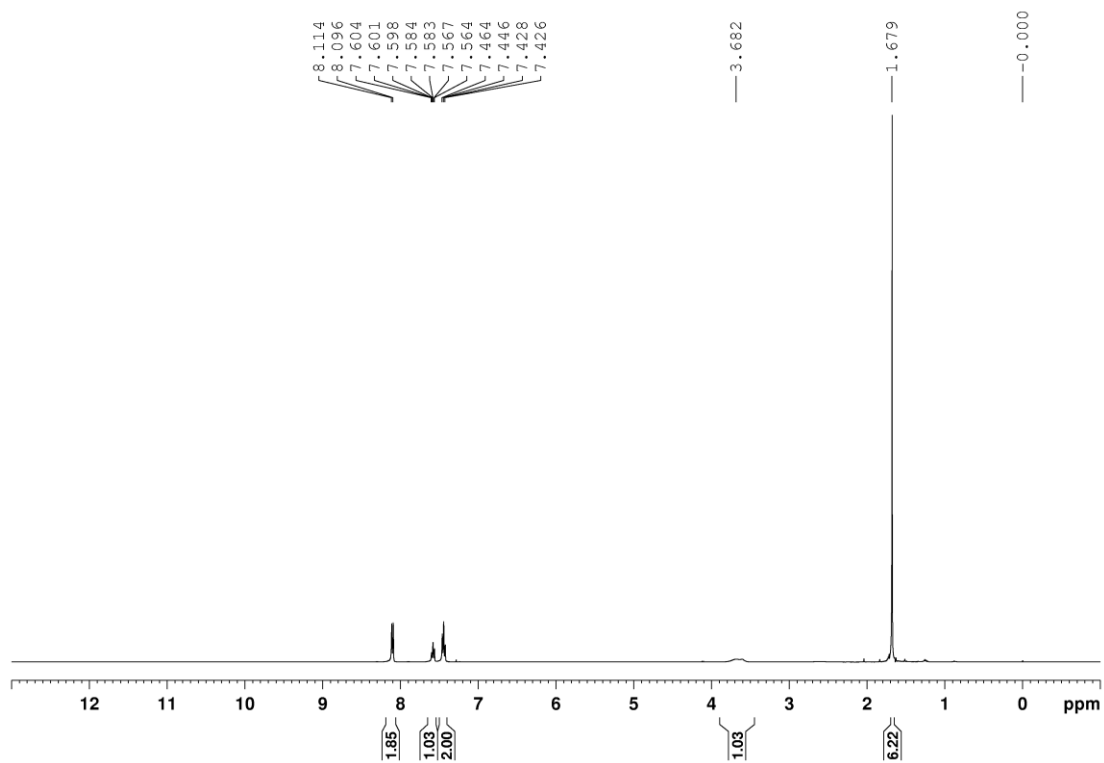

$^{13}\text{C}\{^1\text{H}\}$  NMR spectrum was recorded on 100 MHz in  $\text{CDCl}_3$ .

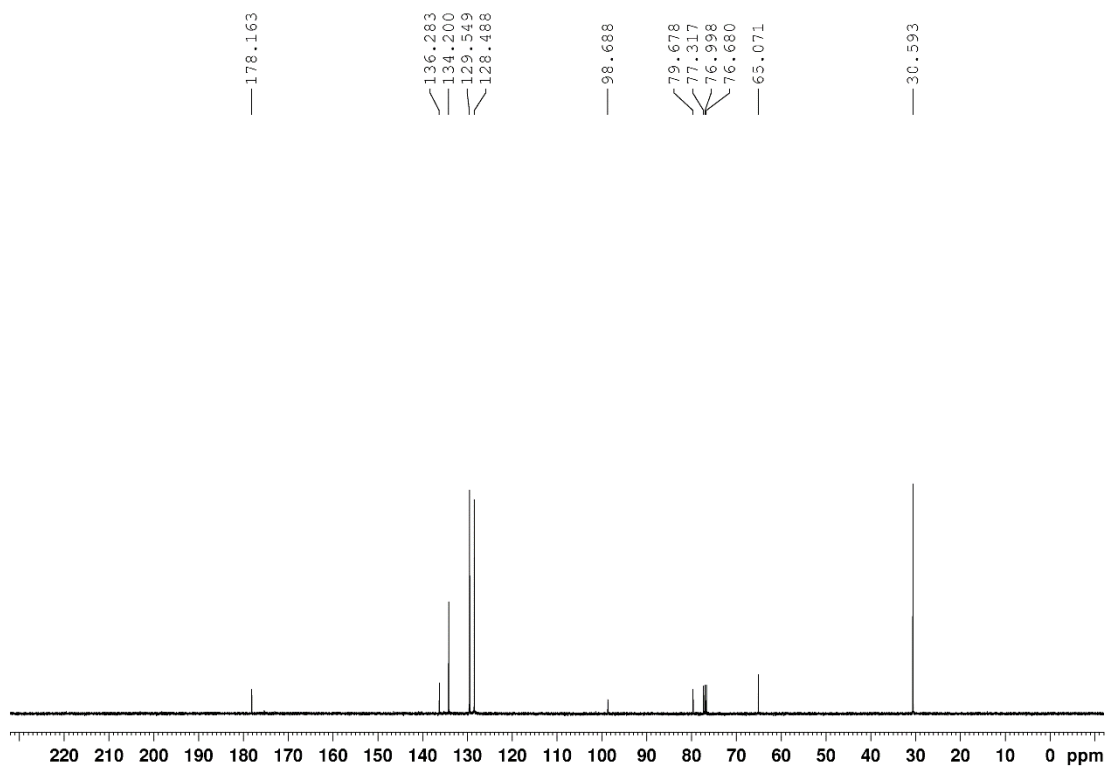

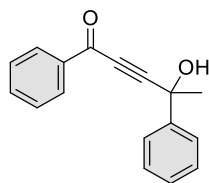

**1b**

$^1\text{H}$  NMR spectrum was recorded on 400 MHz in  $\text{CDCl}_3$ .

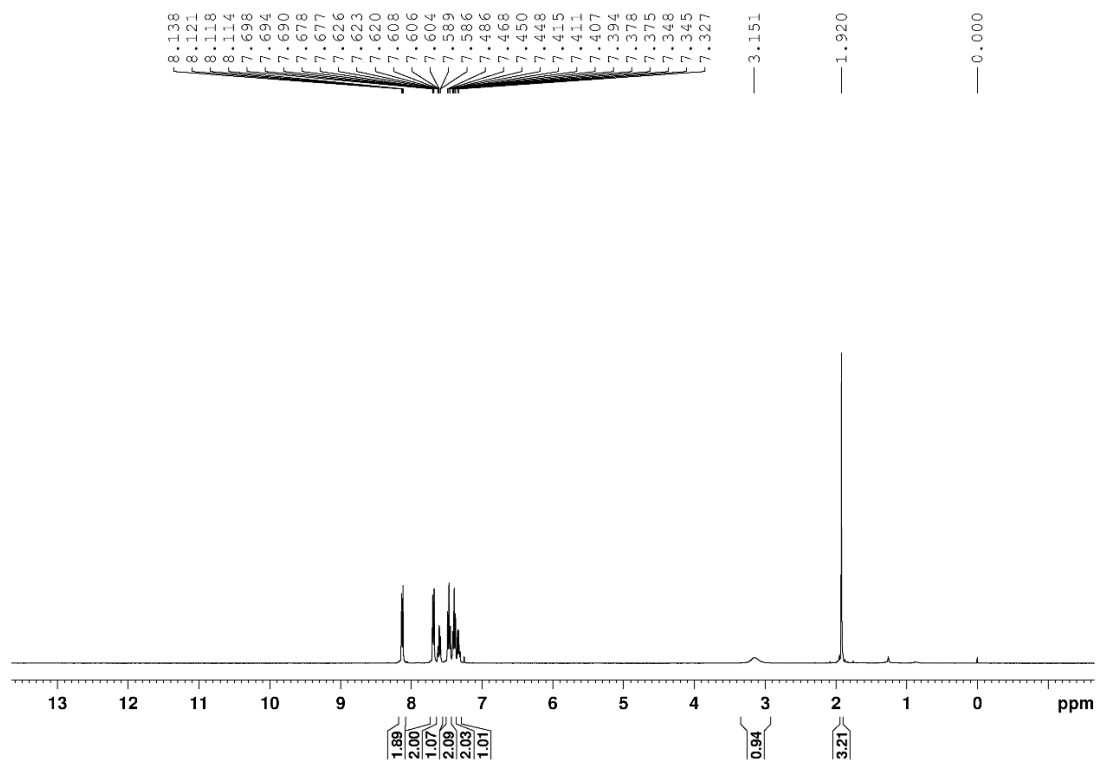

$^{13}\text{C}\{^1\text{H}\}$  NMR spectrum was recorded on 151 MHz in  $\text{CDCl}_3$ .

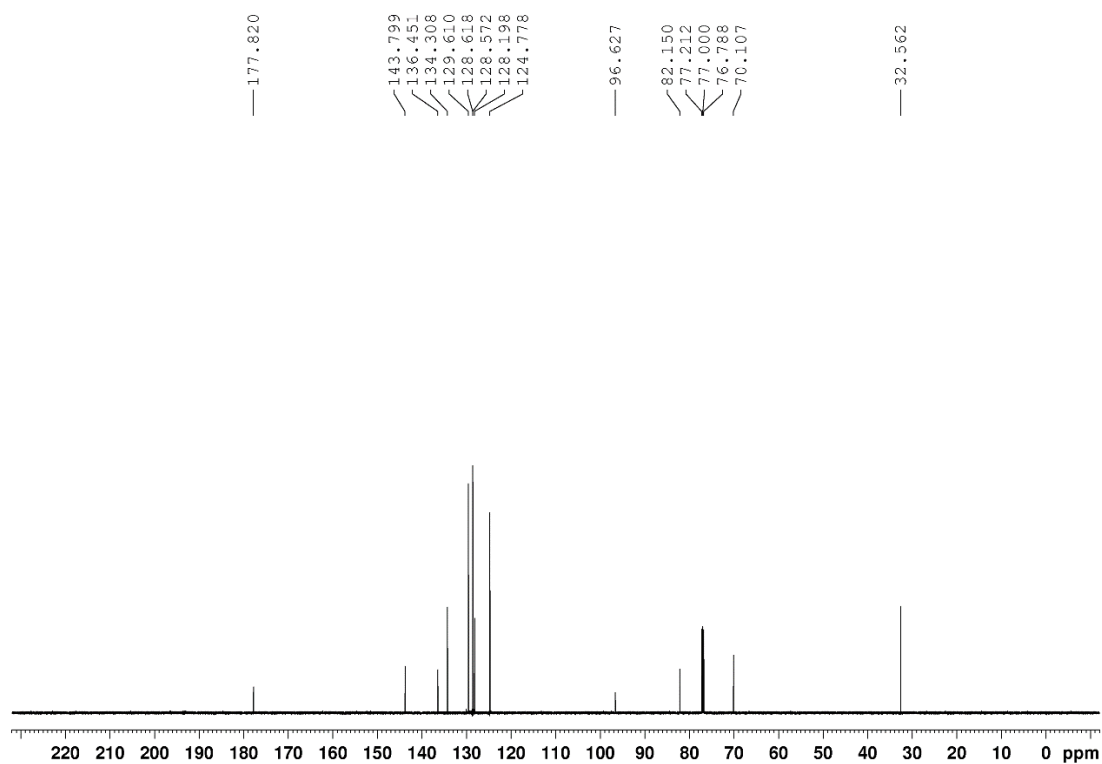

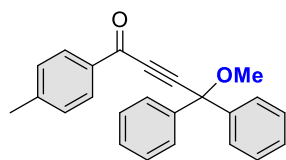

**1ab-OMe**

$^1\text{H}$  NMR spectrum was recorded on 400 MHz in  $\text{CDCl}_3$ .

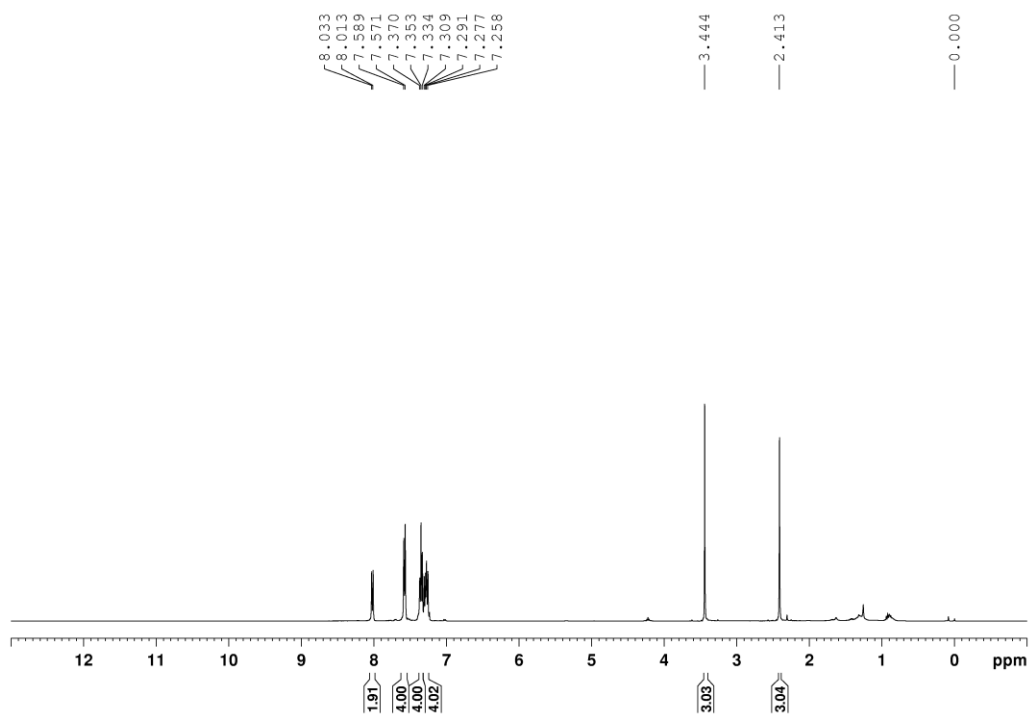

$^{13}\text{C}\{^1\text{H}\}$  NMR spectrum was recorded on 151 MHz in  $\text{CDCl}_3$ .

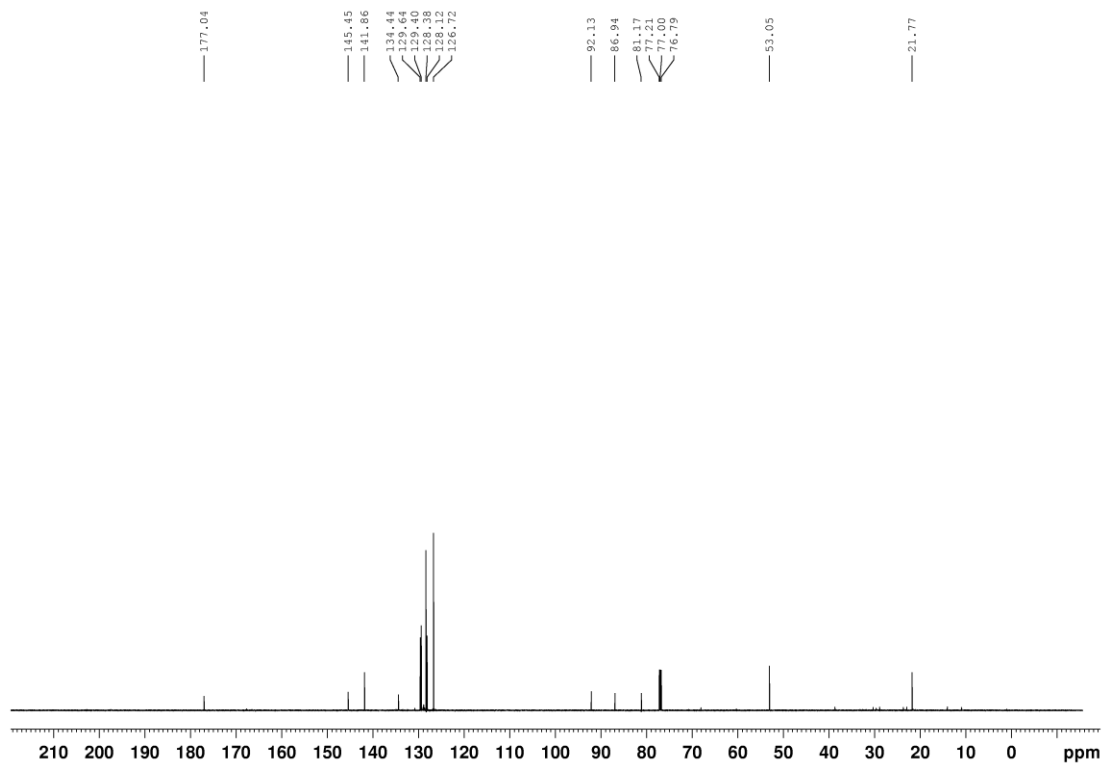

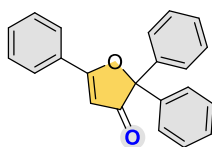

2aa

$^1\text{H}$  NMR spectrum was recorded on 400 MHz in  $\text{CDCl}_3$ .

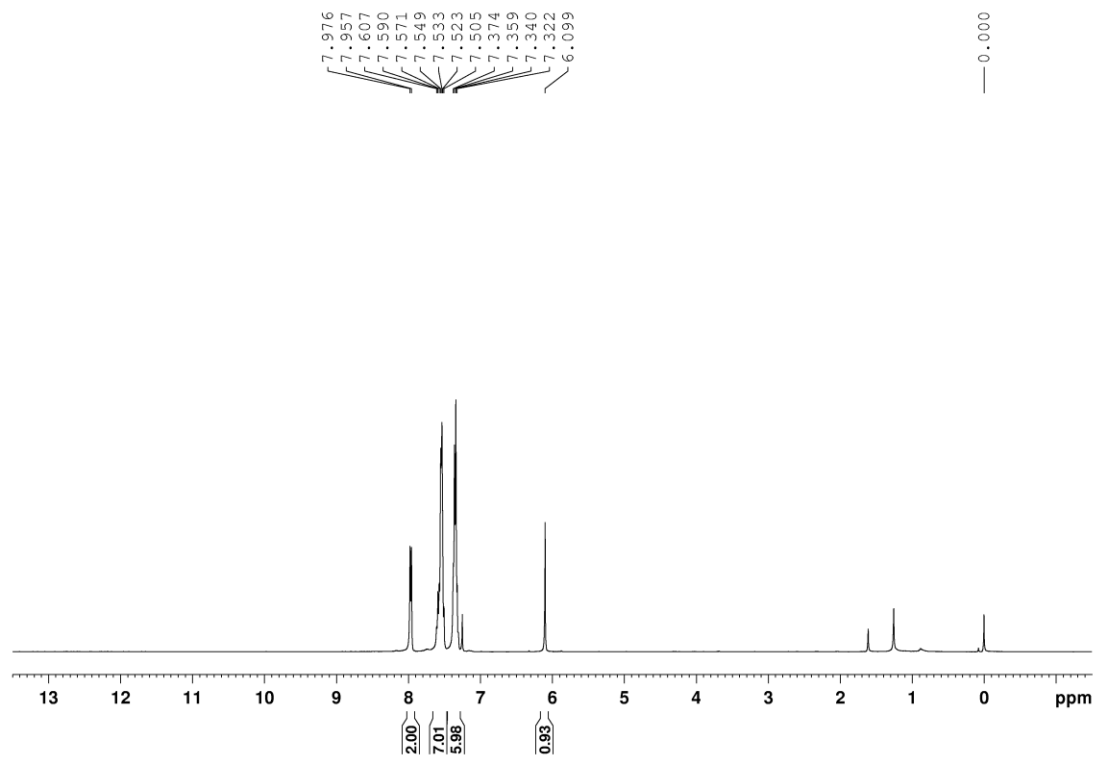

$^{13}\text{C}\{^1\text{H}\}$  NMR spectrum was recorded on 151 MHz in  $\text{CDCl}_3$ .

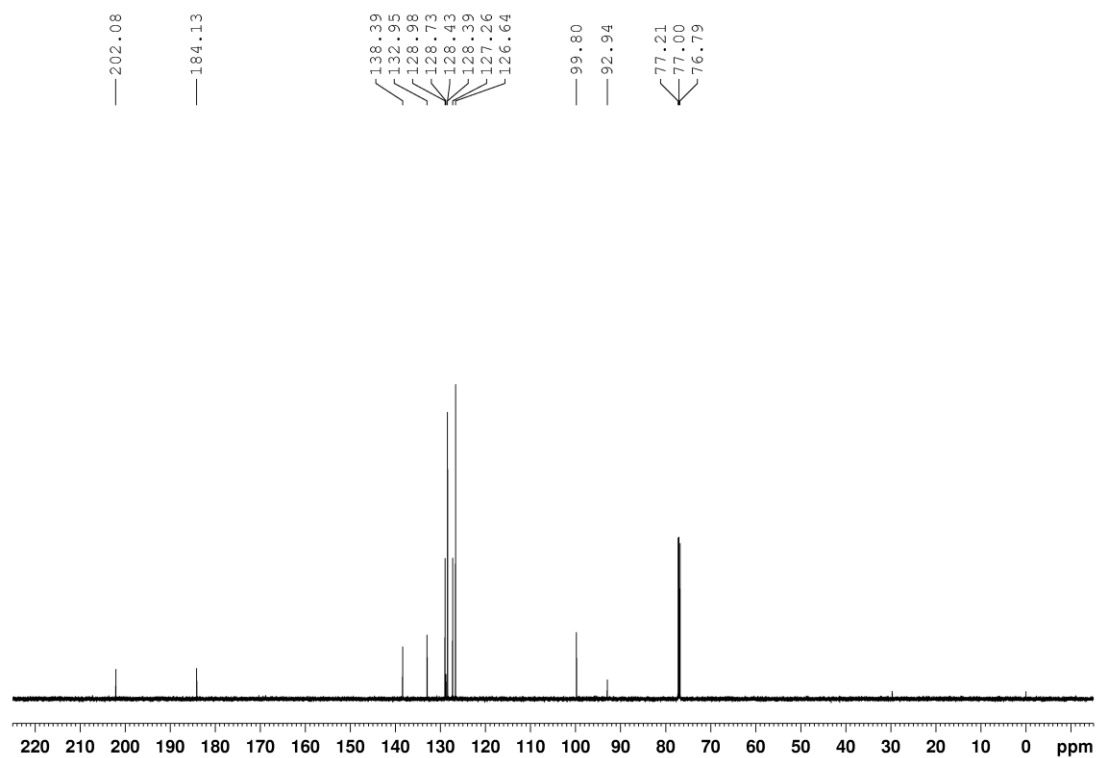

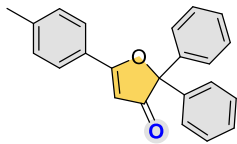

**2ab**

$^1\text{H}$  NMR spectrum was recorded on 600 MHz in  $\text{CDCl}_3$ .

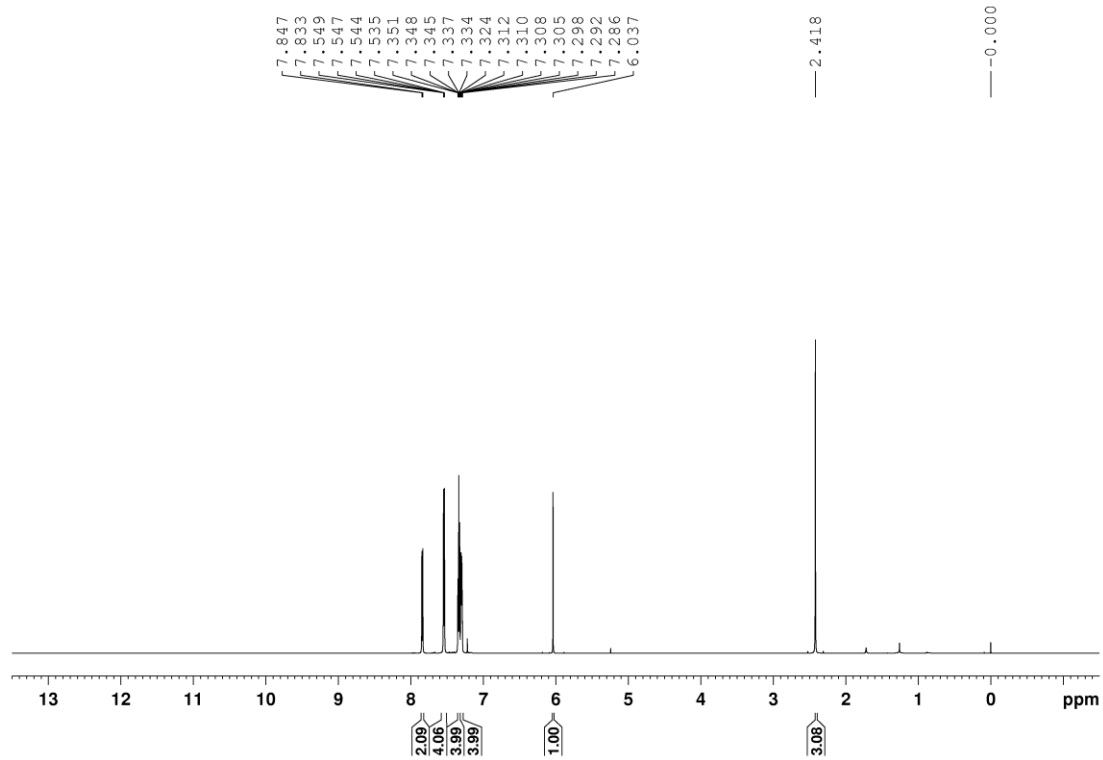

$^{13}\text{C}\{^1\text{H}\}$  NMR spectrum was recorded on 151 MHz in  $\text{CDCl}_3$ .

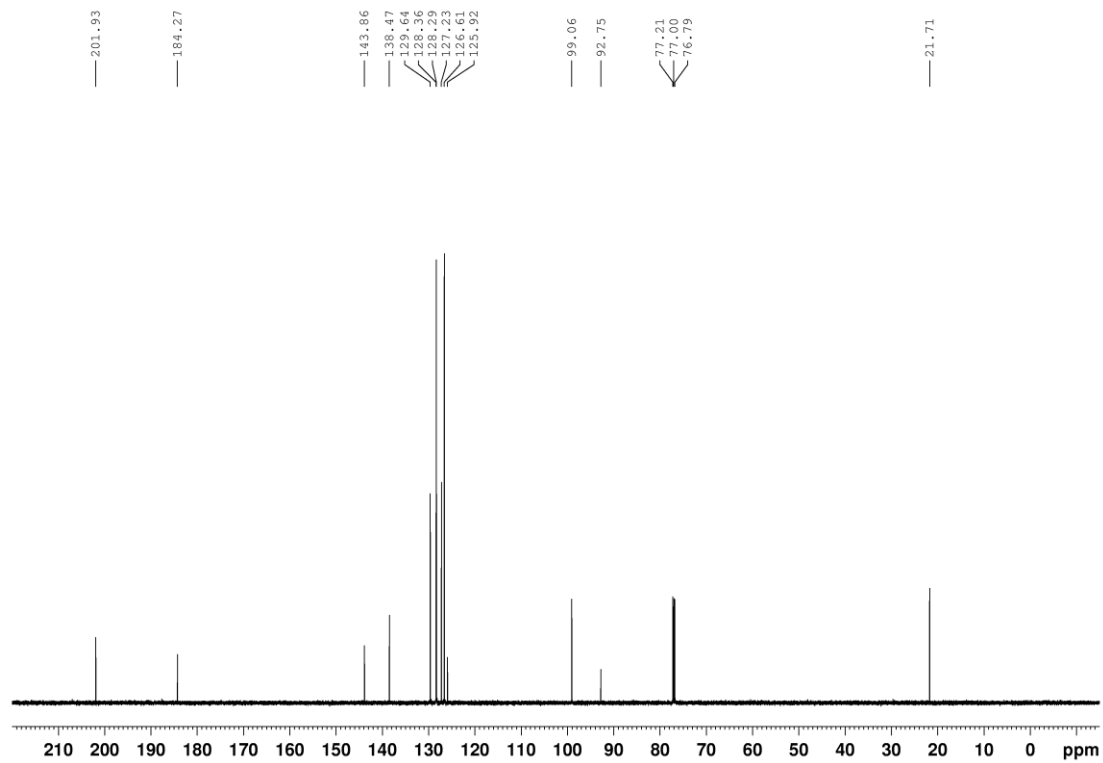

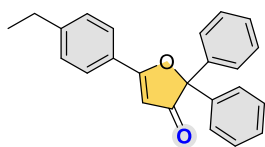

**2ac**

$^1\text{H}$  NMR spectrum was recorded on 600 MHz in  $\text{CDCl}_3$ .

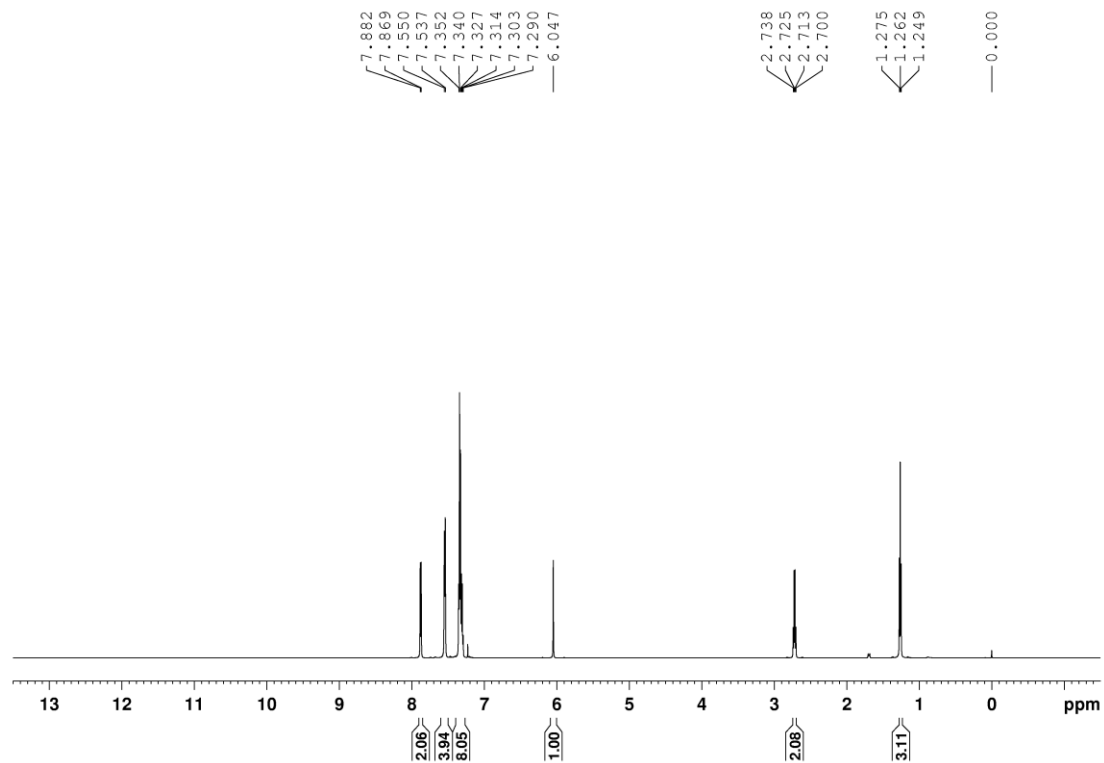

$^{13}\text{C}\{^1\text{H}\}$  NMR spectrum was recorded on 151 MHz in  $\text{CDCl}_3$ .

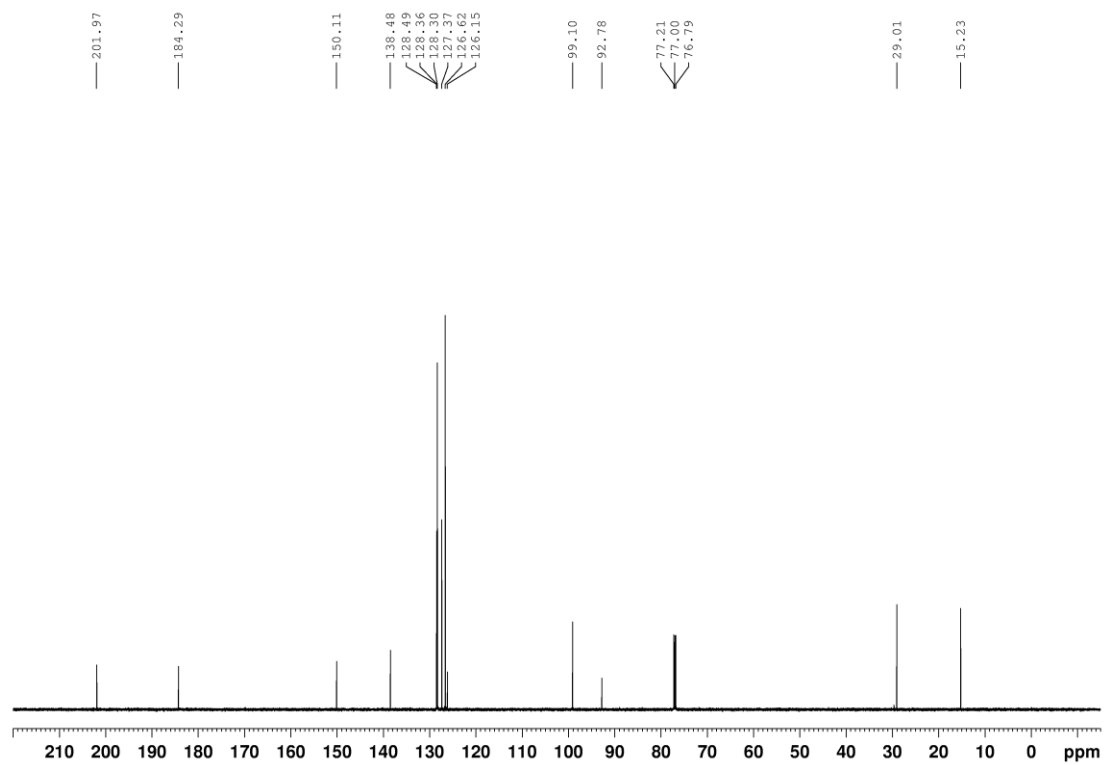

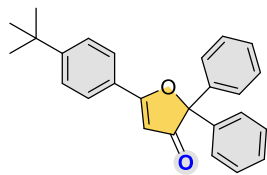

**2ad**

$^1\text{H}$  NMR spectrum was recorded on 400 MHz in  $\text{CDCl}_3$ .

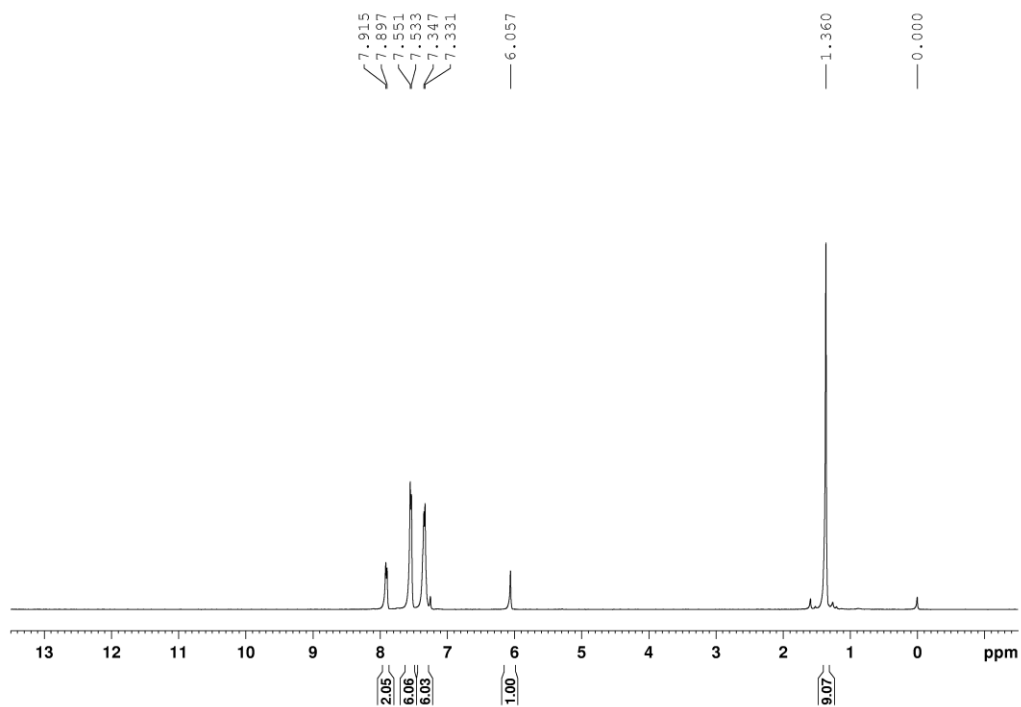

$^{13}\text{C}\{\text{H}\}$  NMR spectrum was recorded on 151 MHz in  $\text{CDCl}_3$ .

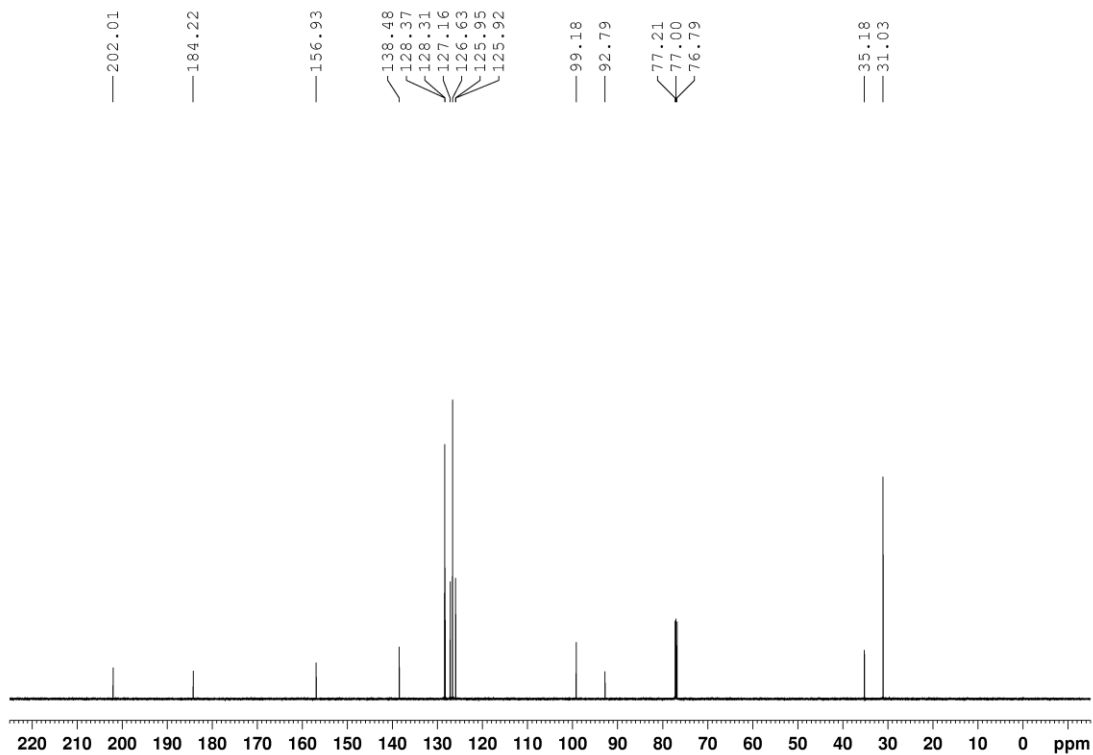



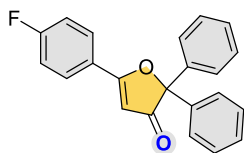

**2ae**

<sup>1</sup>H NMR spectrum was recorded on 400 MHz in CDCl<sub>3</sub>.

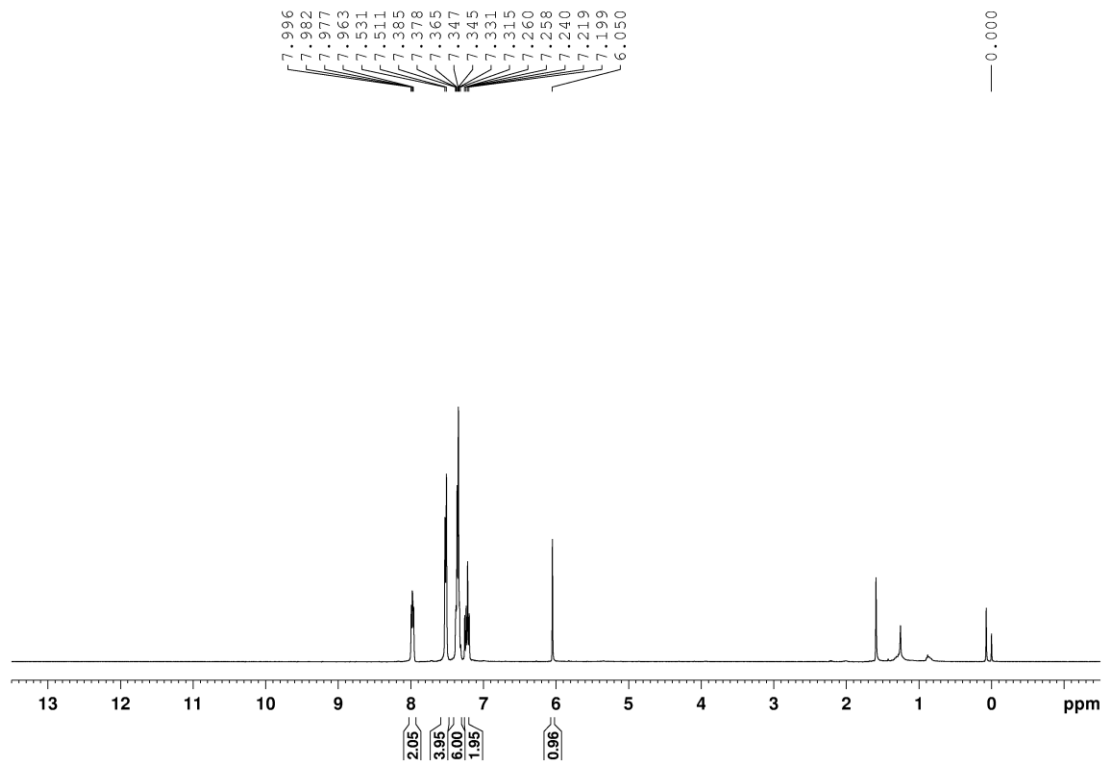

<sup>13</sup>C{<sup>1</sup>H} NMR spectrum was recorded on 151 MHz in CDCl<sub>3</sub>.

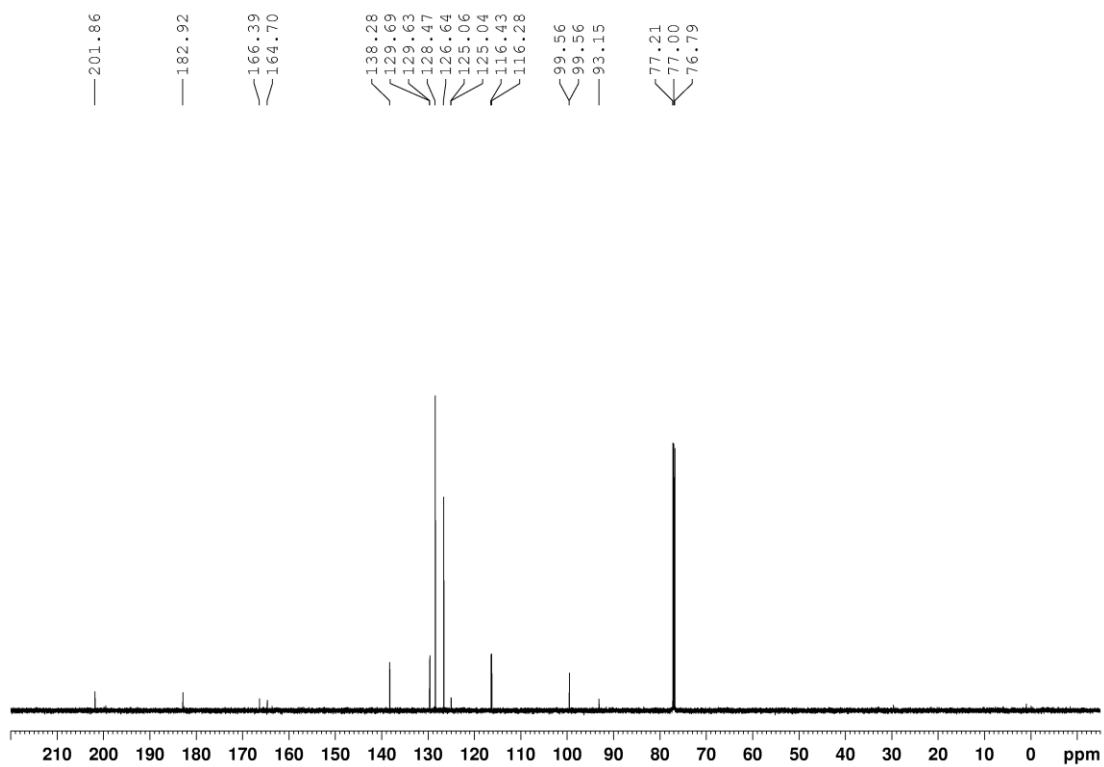

<sup>19</sup>F spectrum was recorded on 376 MHz in CDCl<sub>3</sub>.

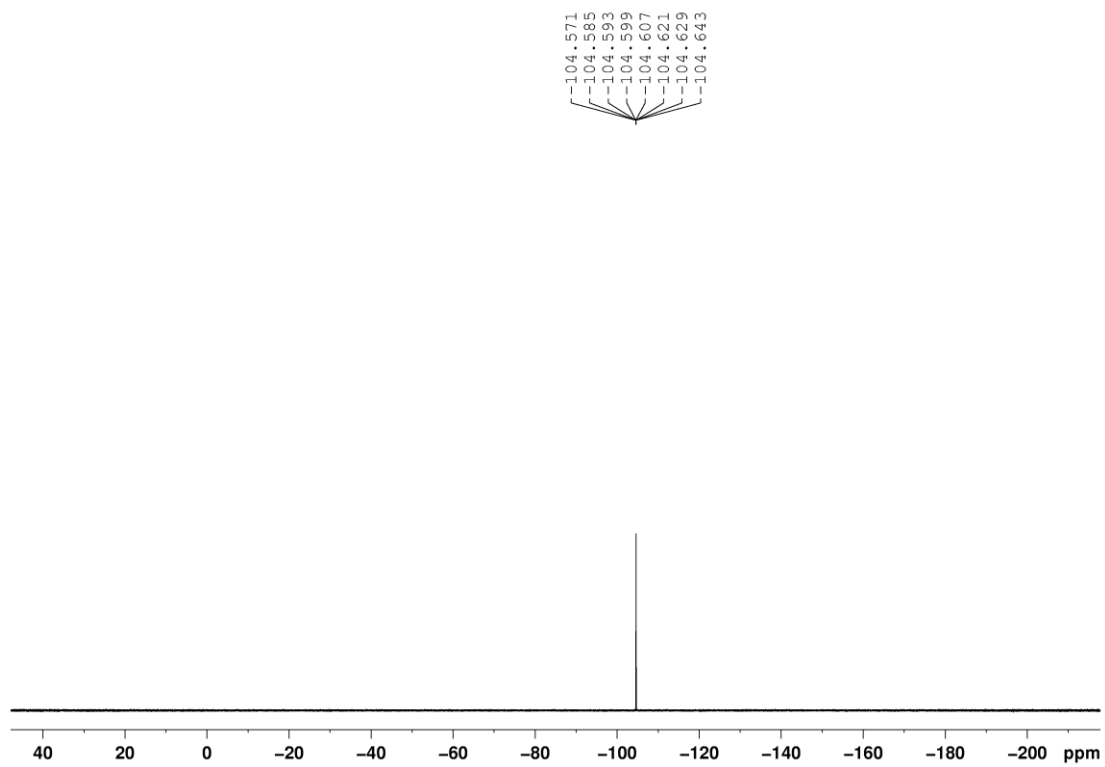

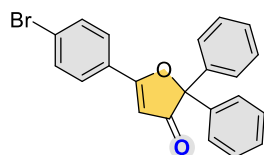

**2af**

$^1\text{H}$  NMR spectrum was recorded on 600 MHz in  $\text{CDCl}_3$ .

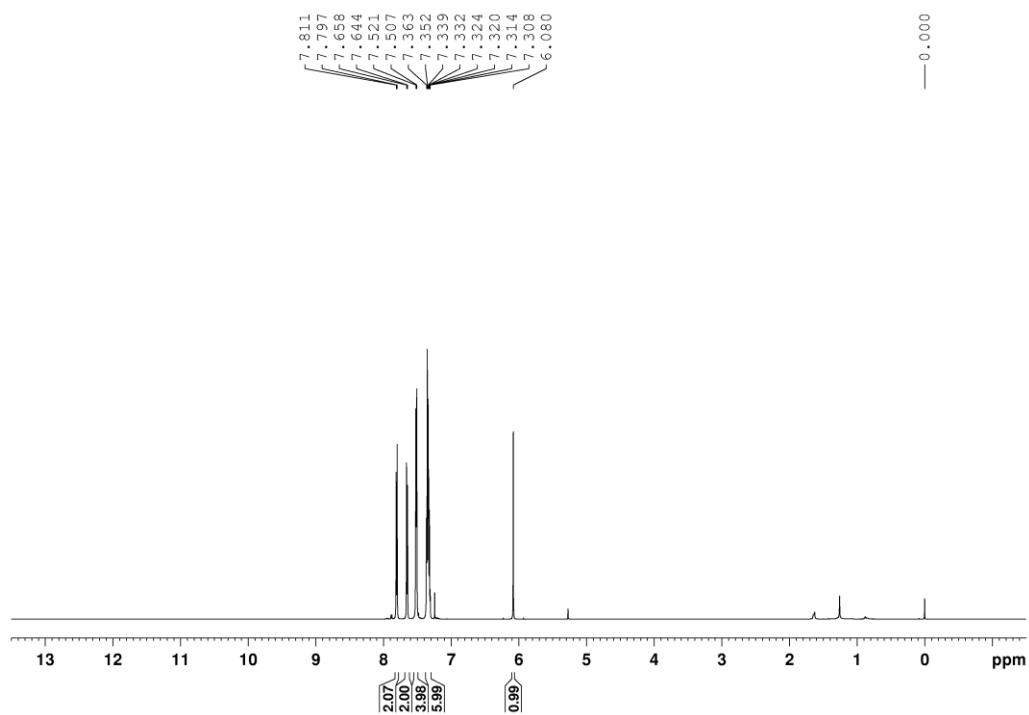

$^{13}\text{C}\{^1\text{H}\}$  NMR spectrum was recorded on 151 MHz in  $\text{CDCl}_3$ .

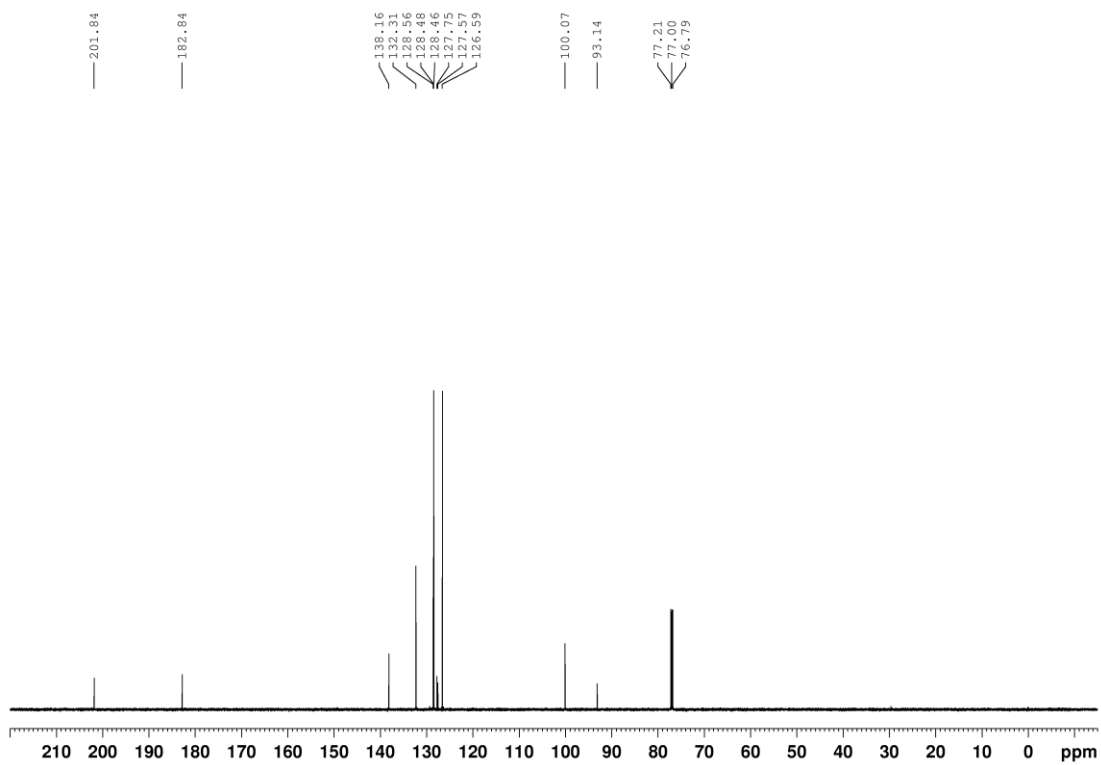

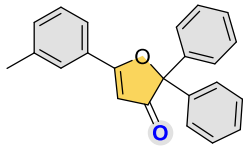

**2ag**

$^1\text{H}$  NMR spectrum was recorded on 600 MHz in  $\text{CDCl}_3$ .

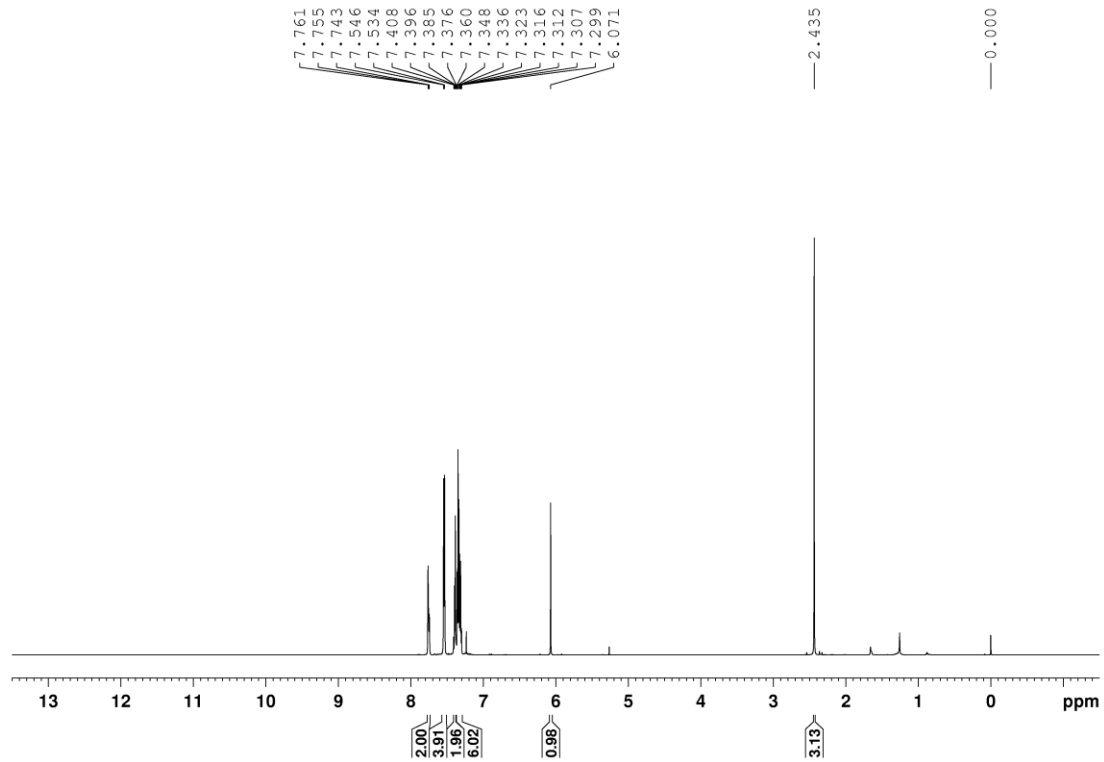

$^{13}\text{C}\{^1\text{H}\}$  NMR spectrum was recorded on 151 MHz in  $\text{CDCl}_3$ .

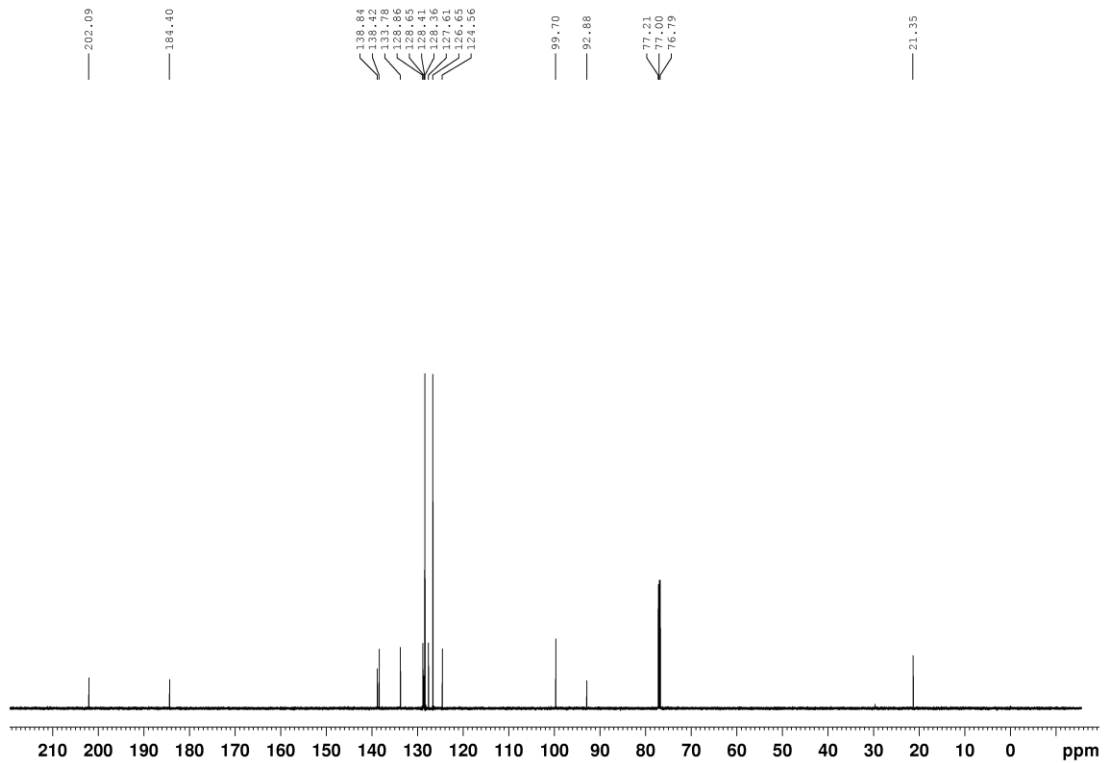

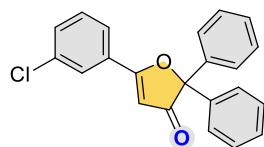

**2ah**

$^1\text{H}$  NMR spectrum was recorded on 400 MHz in  $\text{CDCl}_3$ .

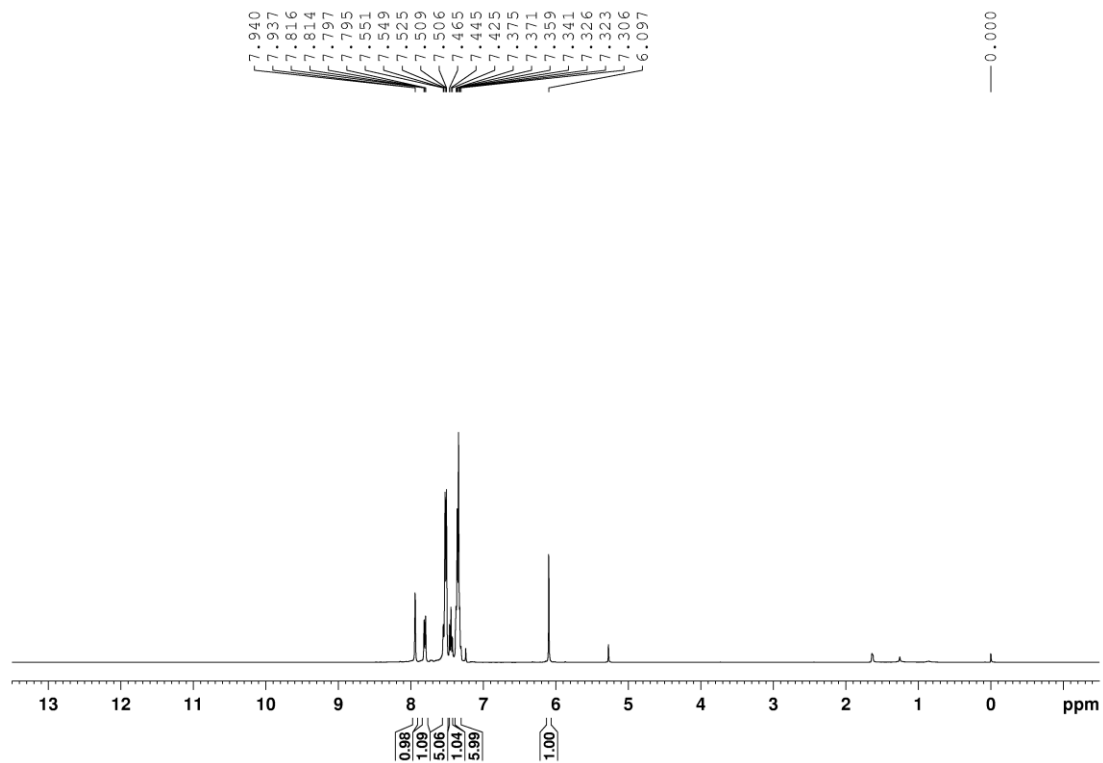

$^{13}\text{C}\{\text{H}\}$  NMR spectrum was recorded on 151 MHz in  $\text{CDCl}_3$ .

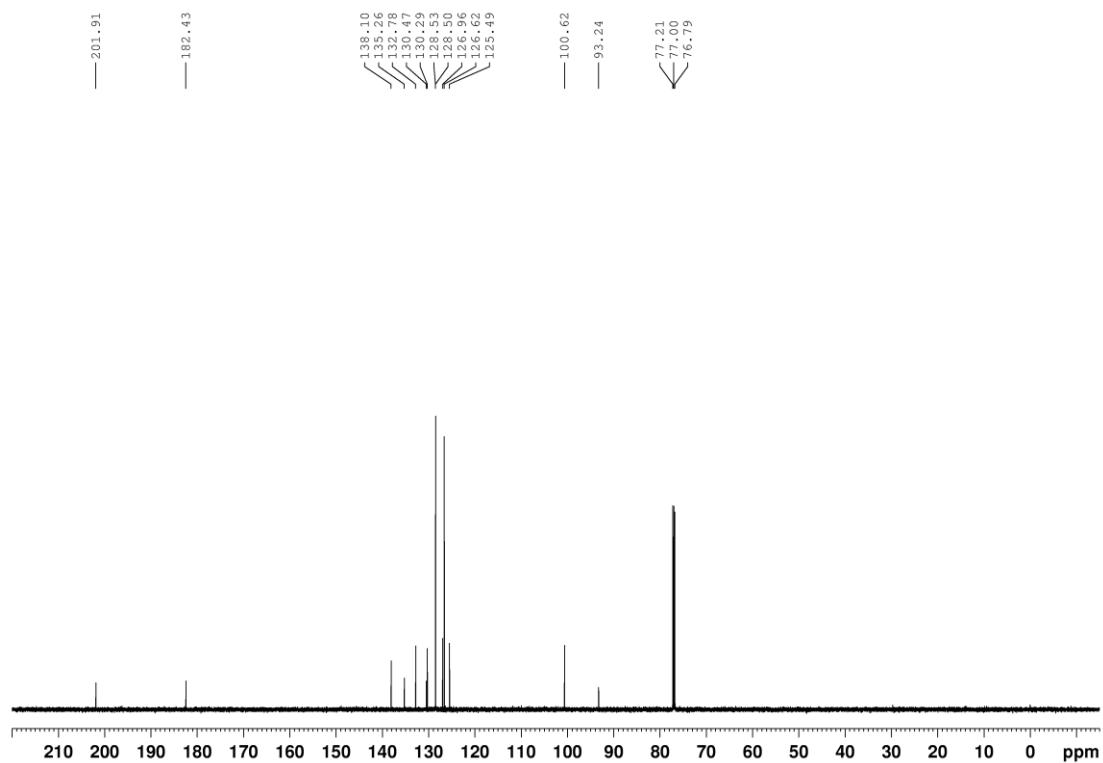

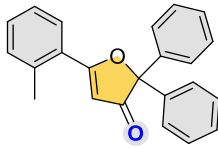

**2ai**

$^1\text{H}$  NMR spectrum was recorded on 400 MHz in  $\text{CDCl}_3$ .

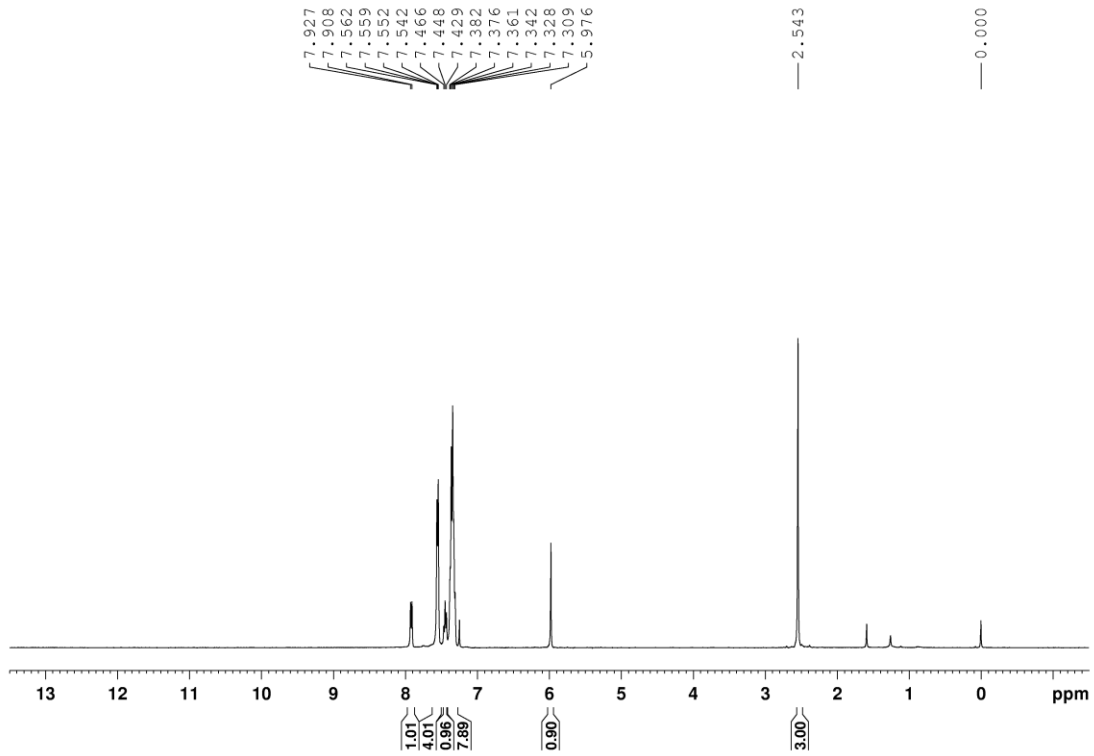

$^{13}\text{C}\{\text{H}\}$  NMR spectrum was recorded on 151 MHz in  $\text{CDCl}_3$ .

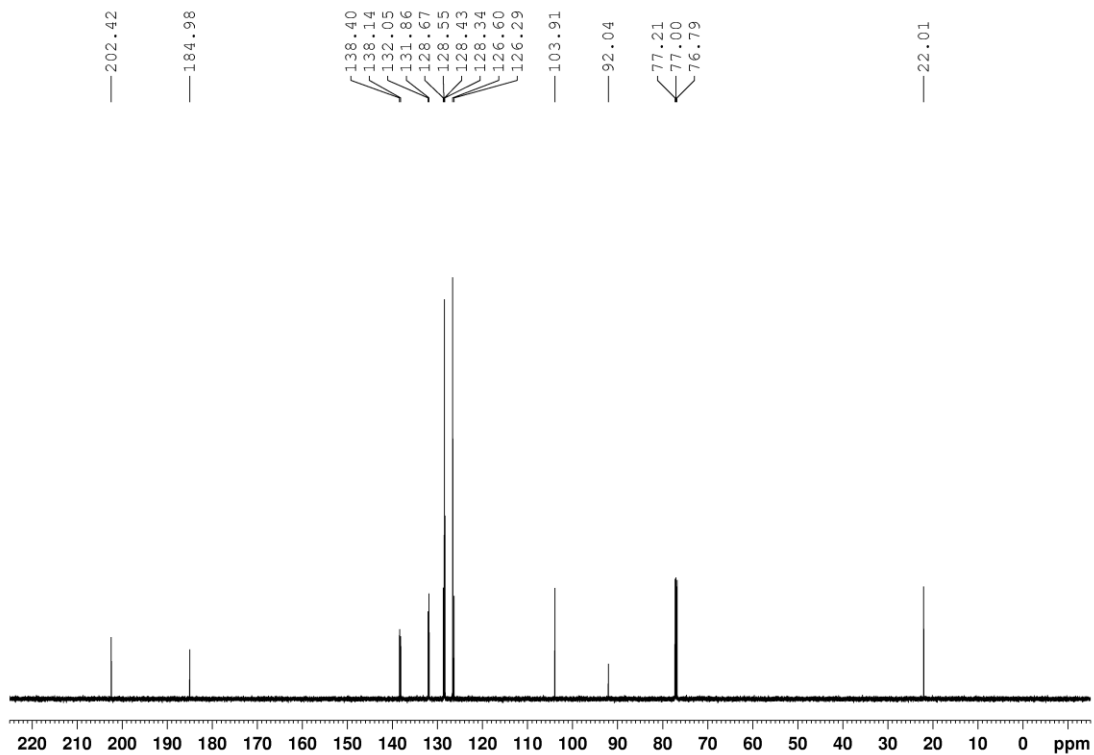

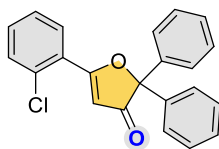

**2aj**

$^1\text{H}$  NMR spectrum was recorded on 400 MHz in  $\text{CDCl}_3$ .

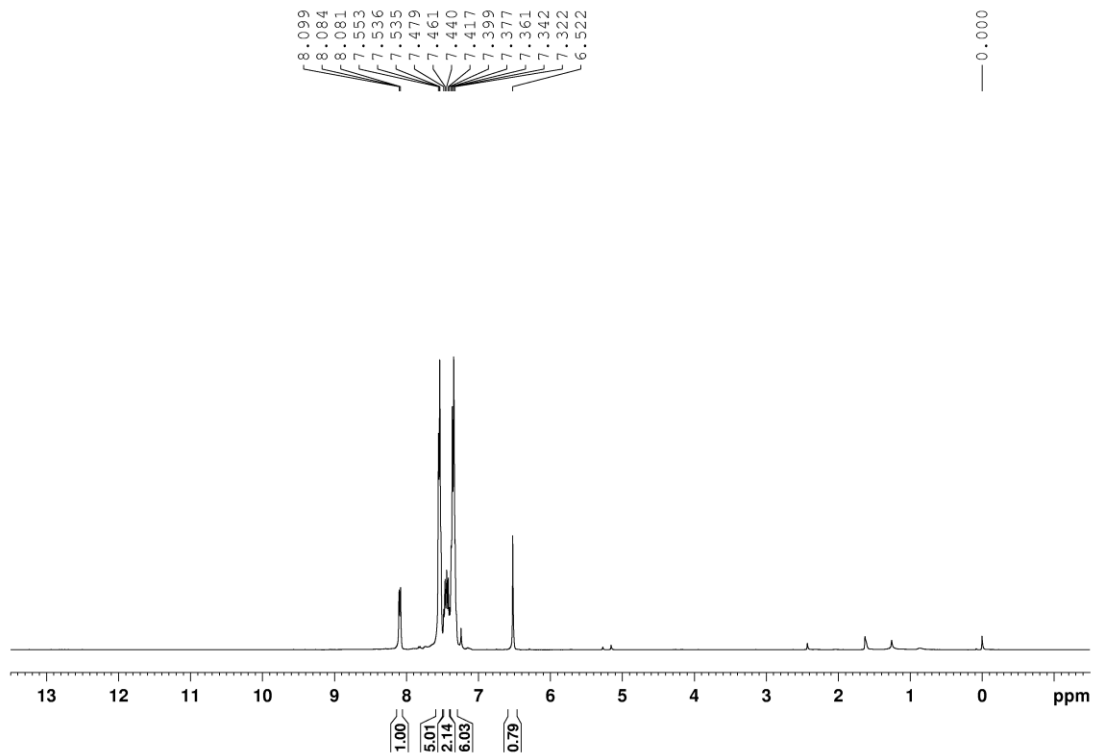

$^{13}\text{C}\{^1\text{H}\}$  NMR spectrum was recorded on 151 MHz in  $\text{CDCl}_3$ .

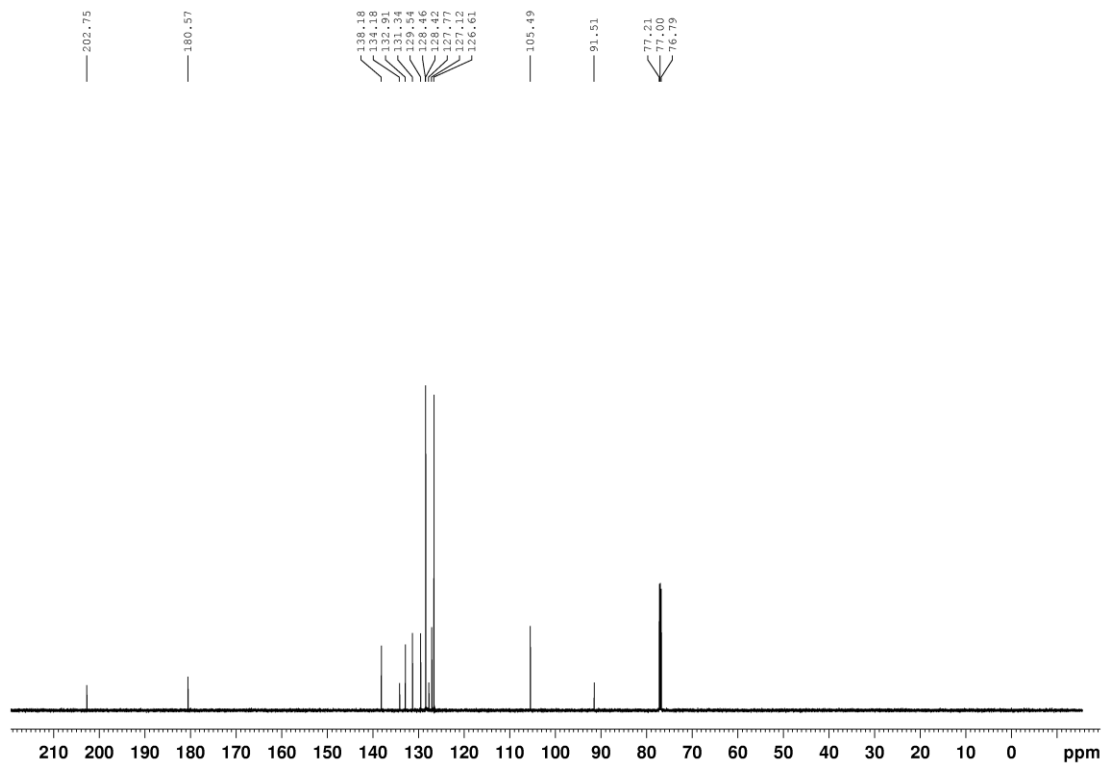

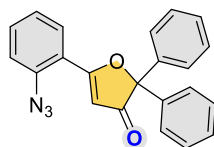

**2ak**

$^1\text{H}$  NMR spectrum was recorded on 600 MHz in  $\text{CDCl}_3$ .

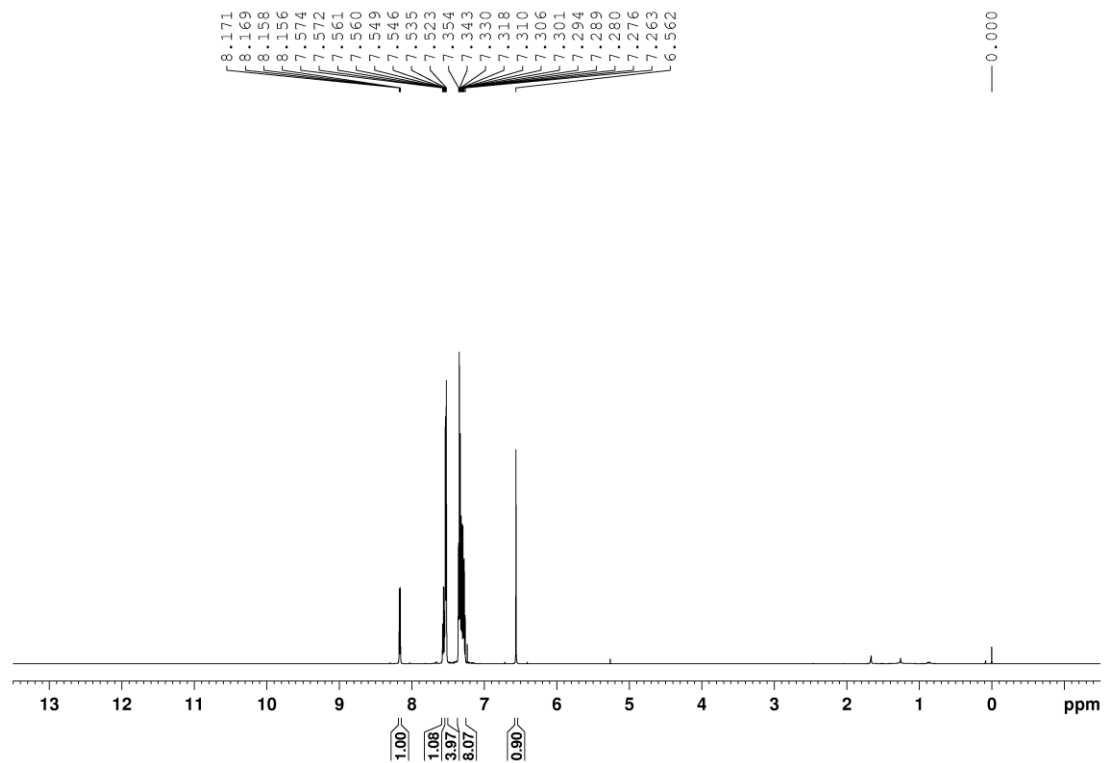

$^{13}\text{C}\{^1\text{H}\}$  NMR spectrum was recorded on 151 MHz in  $\text{CDCl}_3$ .

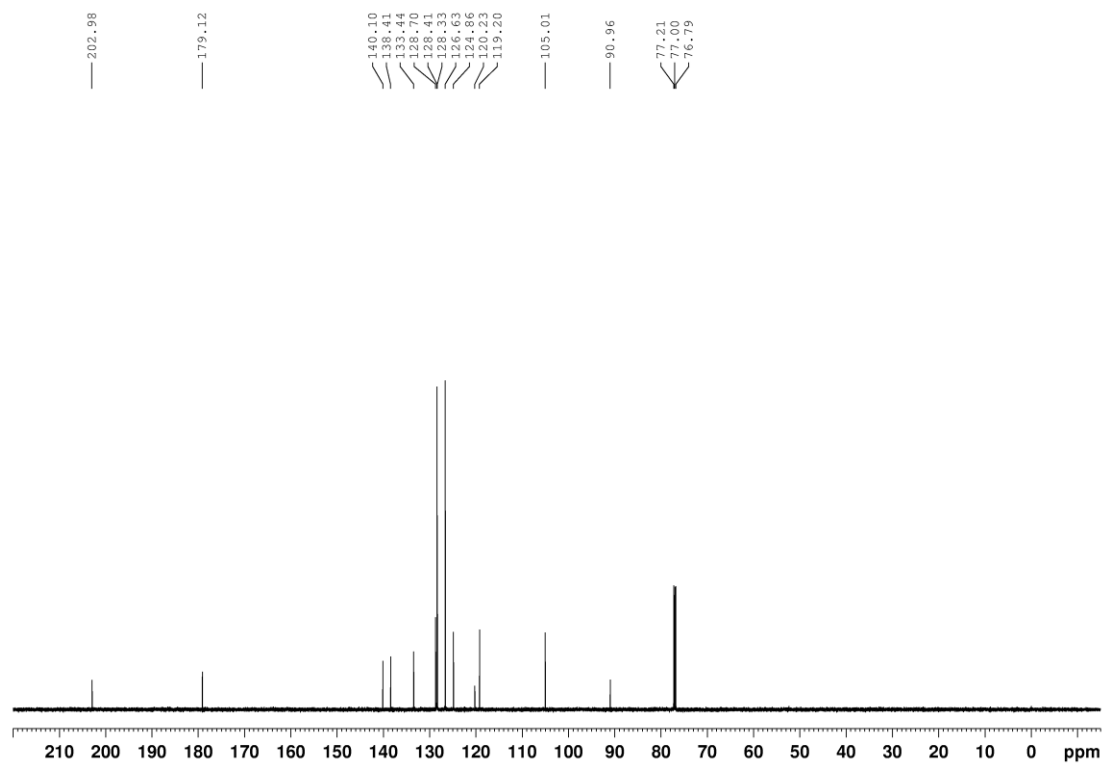



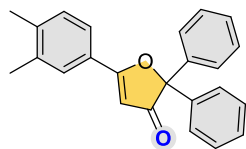

**2aI**

$^1\text{H}$  NMR spectrum was recorded on 600 MHz in  $\text{CDCl}_3$ .

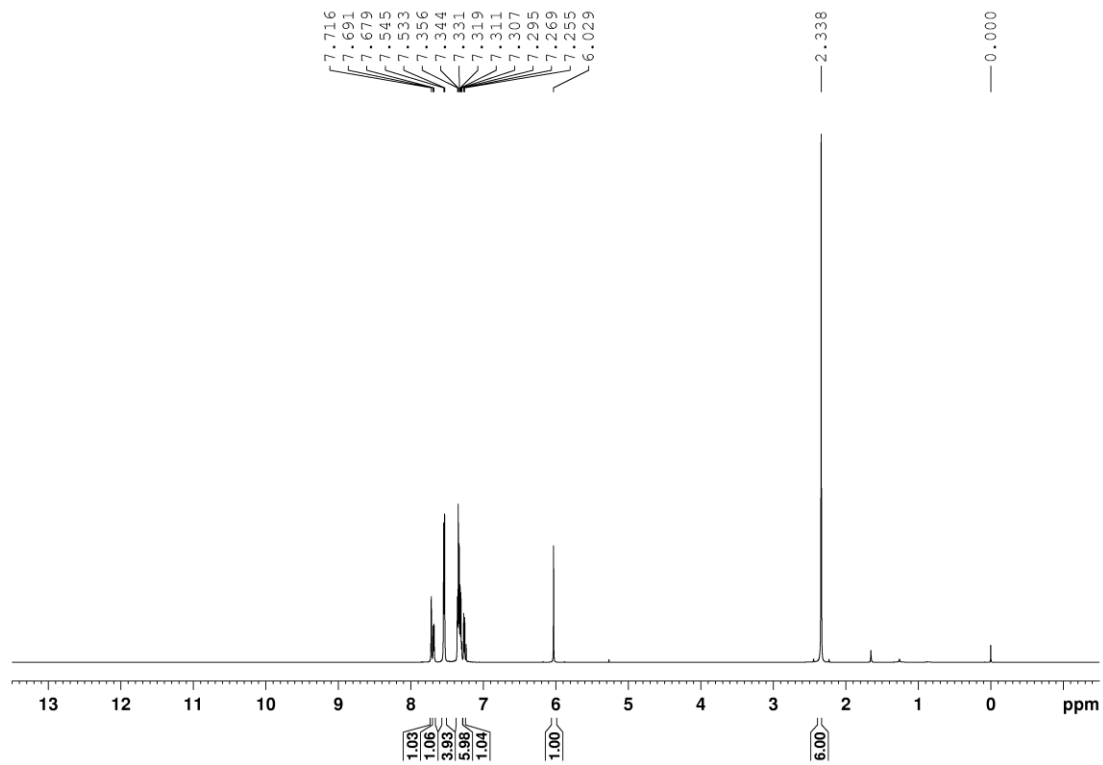

$^{13}\text{C}\{\text{H}\}$  NMR spectrum was recorded on 151 MHz in  $\text{CDCl}_3$ .

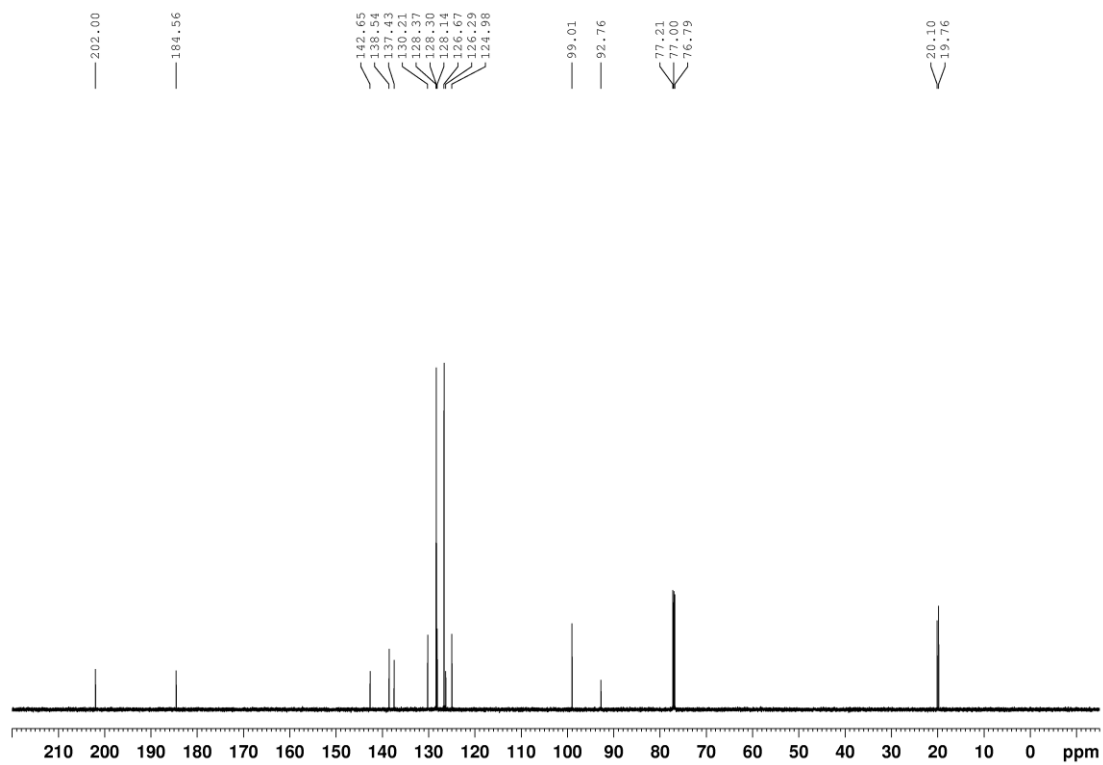

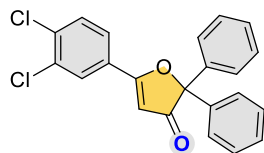

**2am**

$^1\text{H}$  NMR spectrum was recorded on 400 MHz in  $\text{CDCl}_3$ .

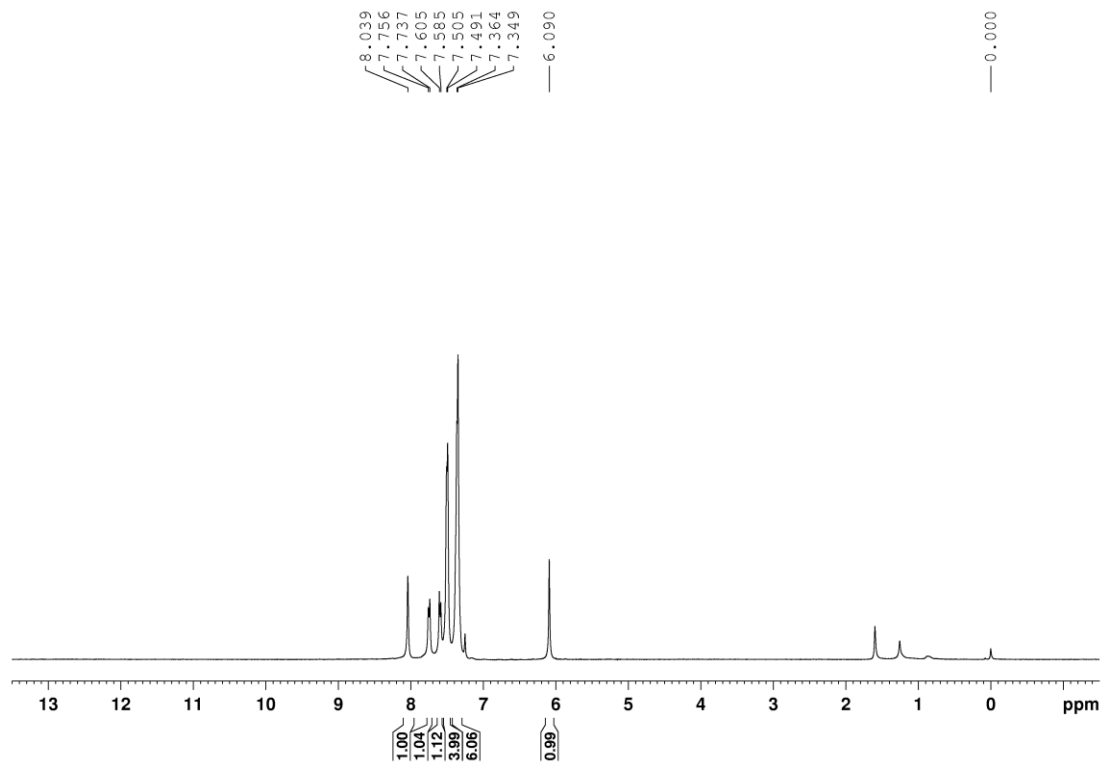

$^{13}\text{C}\{^1\text{H}\}$  NMR spectrum was recorded on 151 MHz in  $\text{CDCl}_3$ .

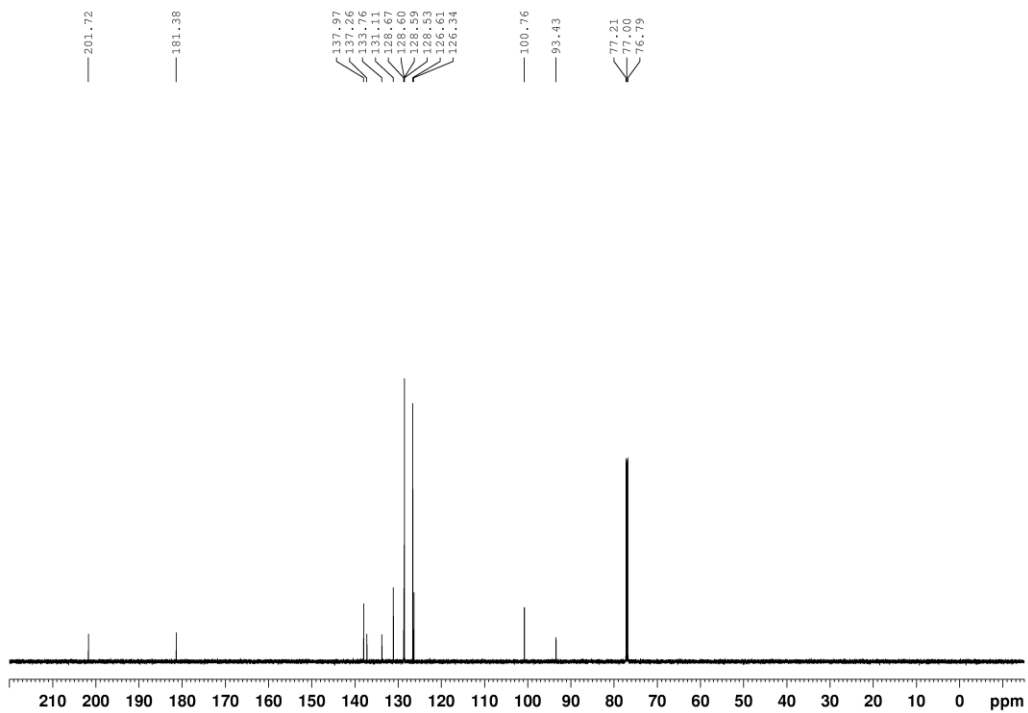

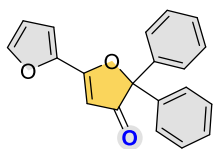

**2an**

<sup>1</sup>H NMR spectrum was recorded on 400 MHz in CDCl<sub>3</sub>.

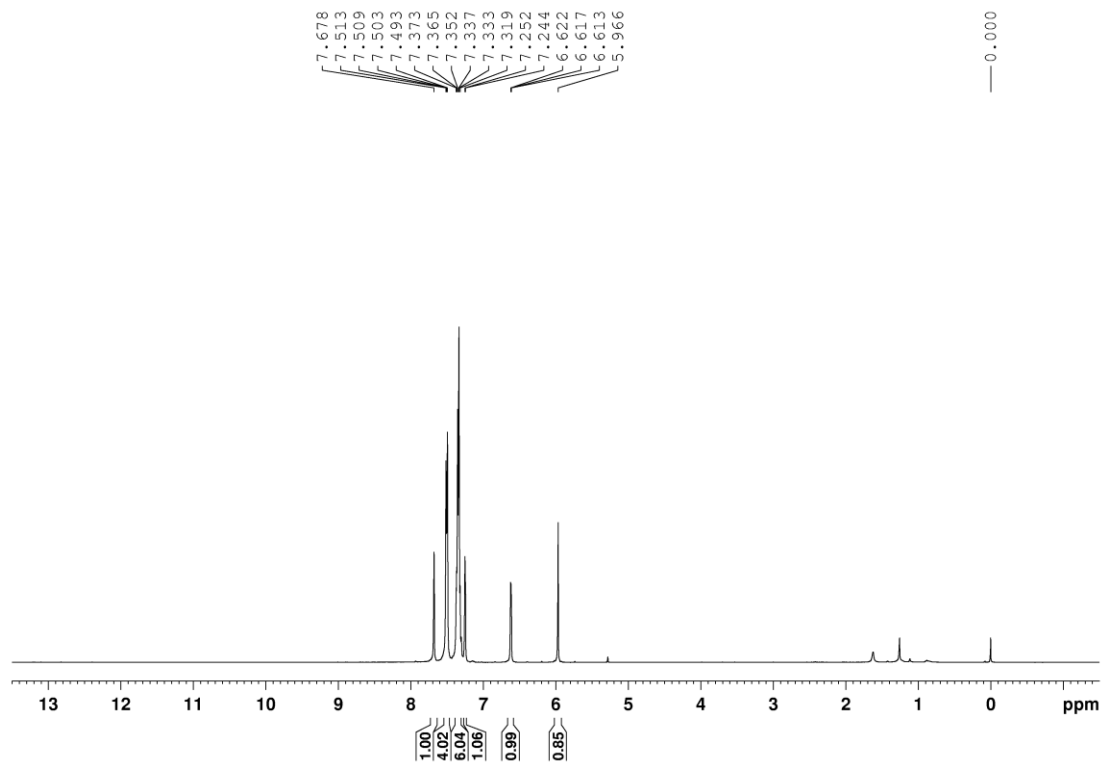

<sup>13</sup>C{<sup>1</sup>H} NMR spectrum was recorded on 151 MHz in CDCl<sub>3</sub>.

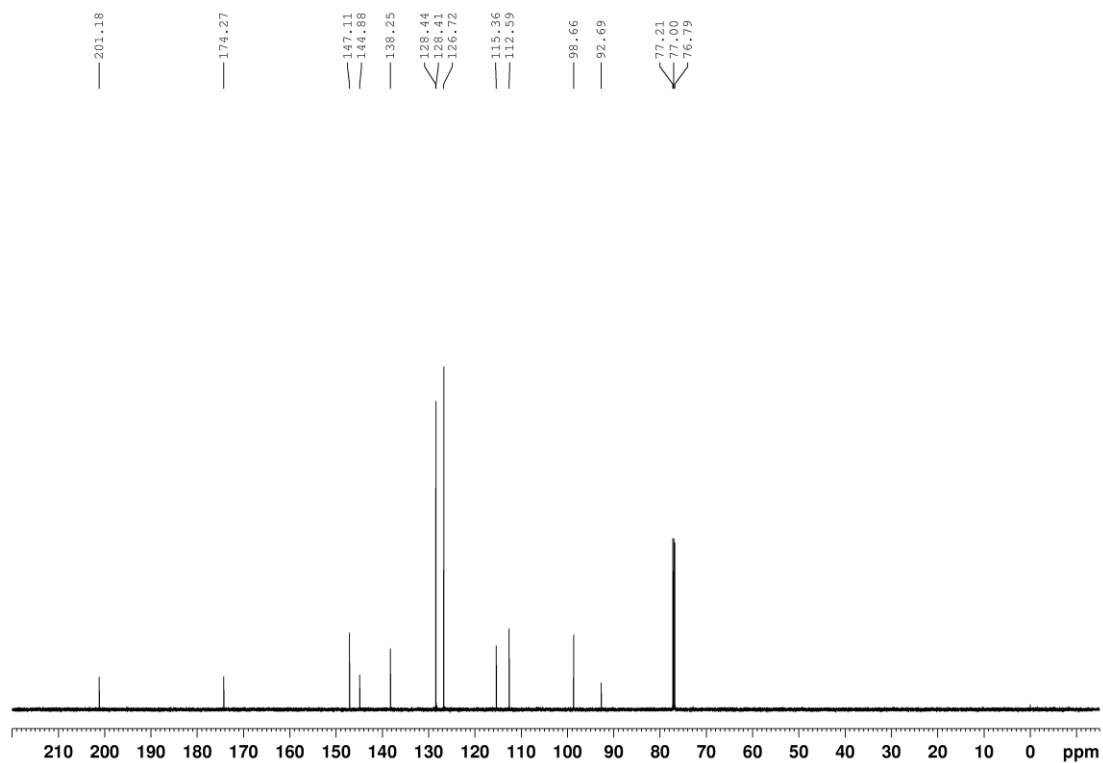

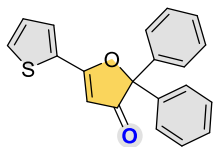

**2ao**

$^1\text{H}$  NMR spectrum was recorded on 400 MHz in  $\text{CDCl}_3$ .

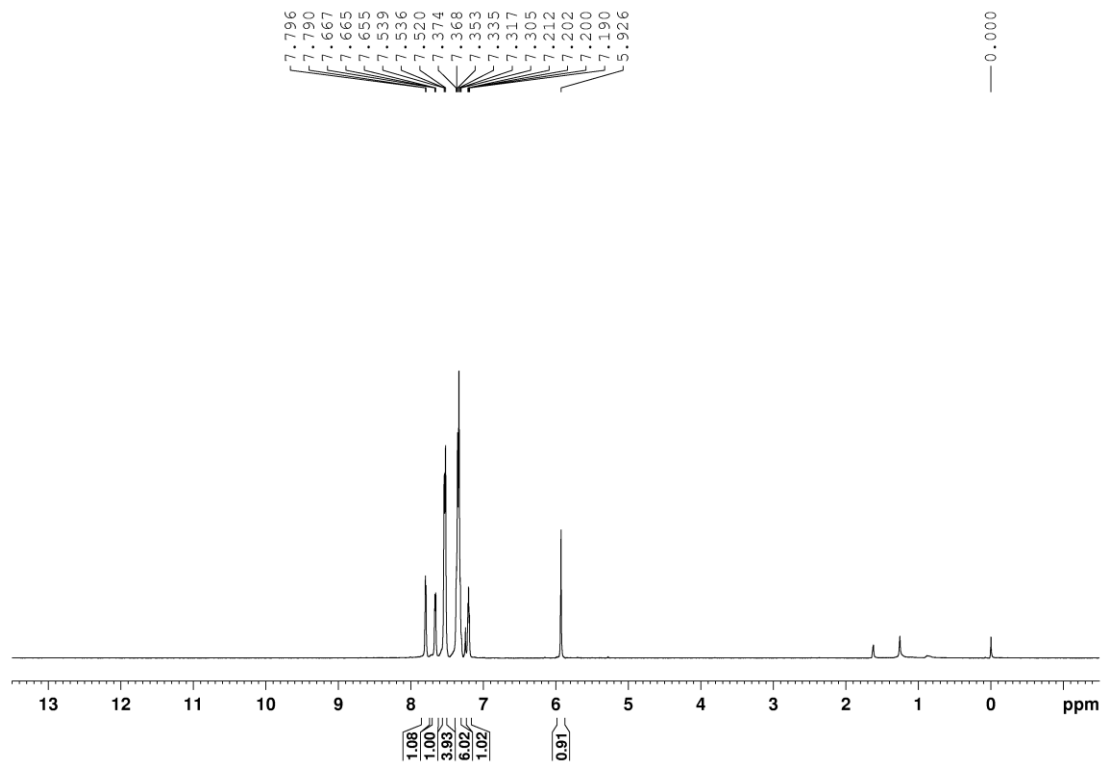

$^{13}\text{C}\{^1\text{H}\}$  NMR spectrum was recorded on 151 MHz in  $\text{CDCl}_3$ .

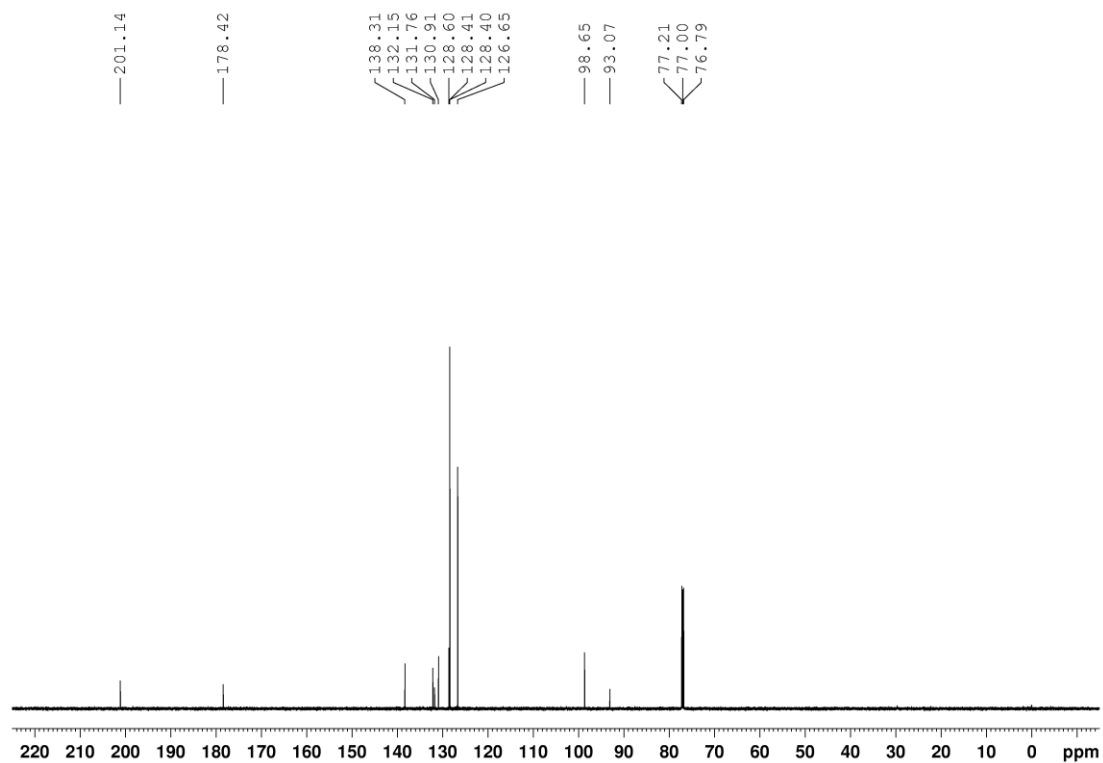

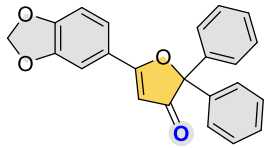

**2ap**

<sup>1</sup>H NMR spectrum was recorded on 400 MHz in CDCl<sub>3</sub>.

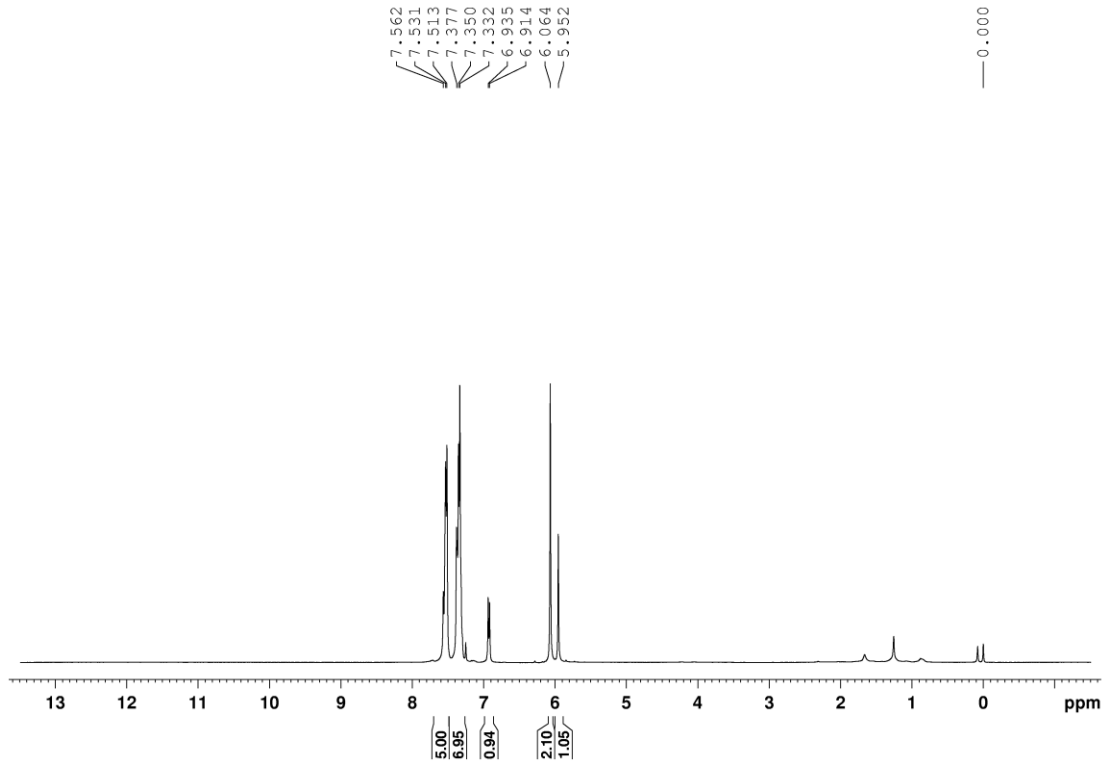

<sup>13</sup>C{<sup>1</sup>H} NMR spectrum was recorded on 151 MHz in CDCl<sub>3</sub>.

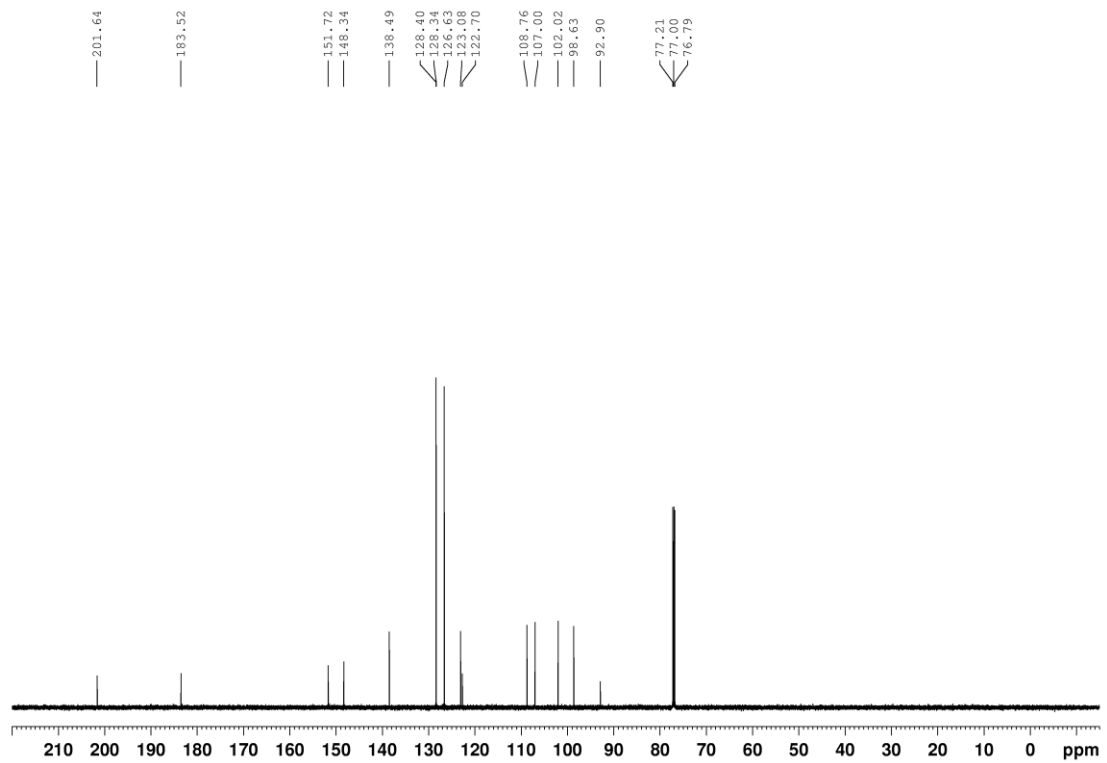

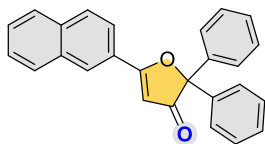

**2aq**

$^1\text{H}$  NMR spectrum was recorded on 400 MHz in  $\text{CDCl}_3$ .

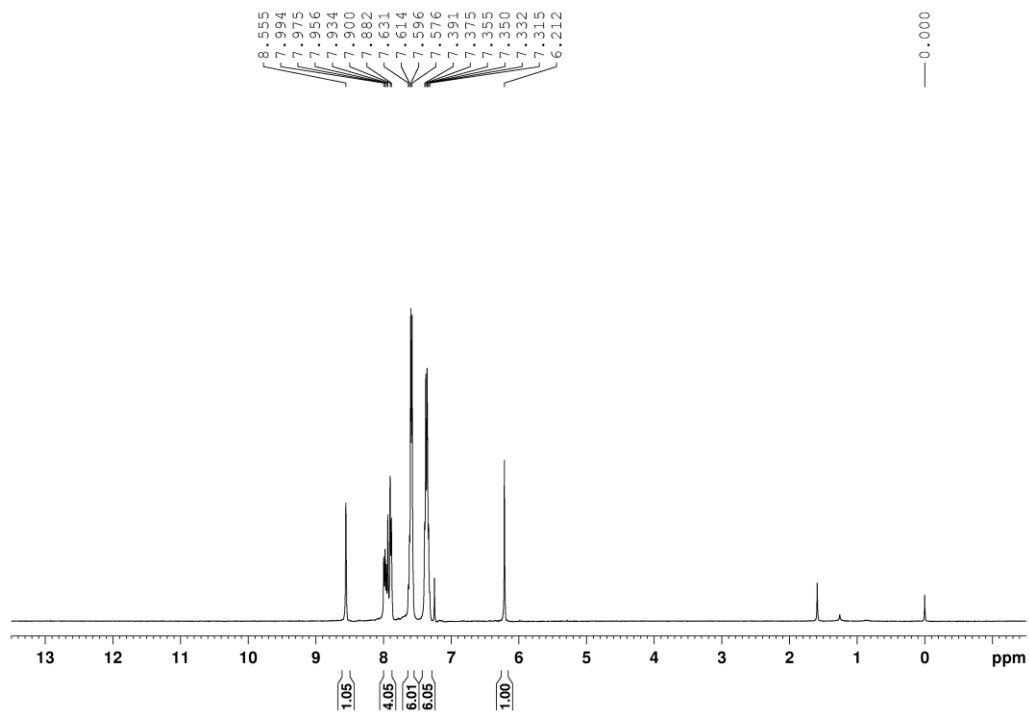

$^{13}\text{C}\{\text{H}\}$  NMR spectrum was recorded on 151 MHz in  $\text{CDCl}_3$ .

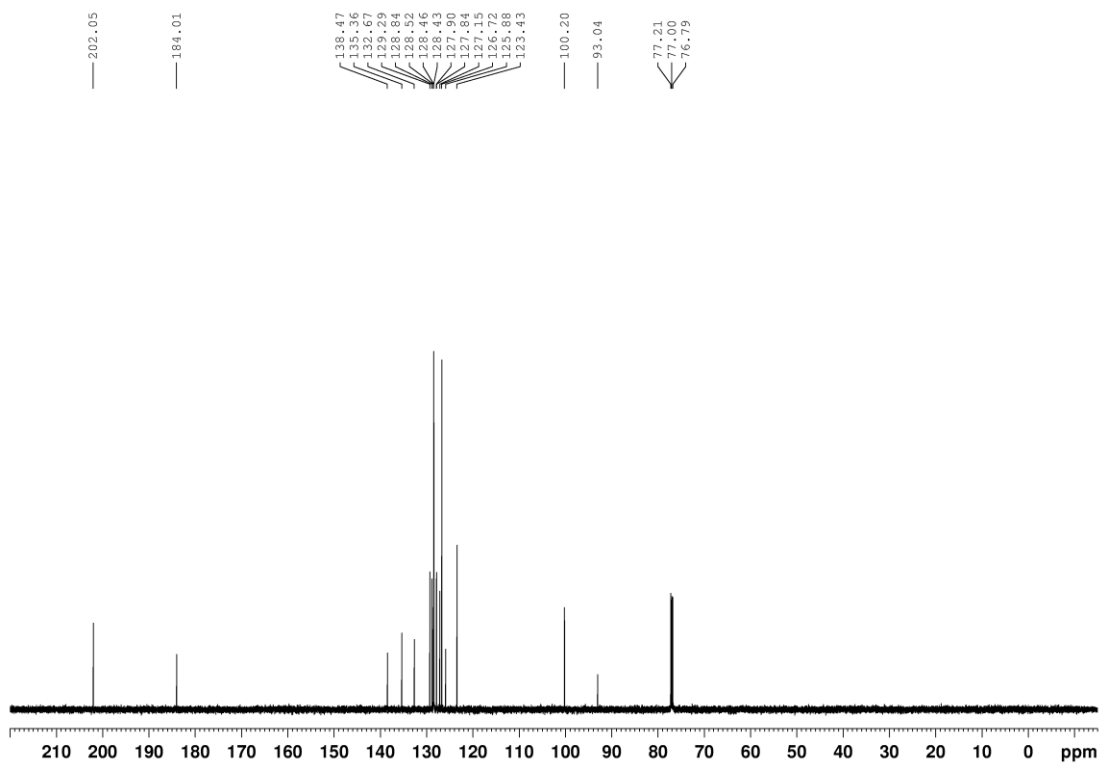

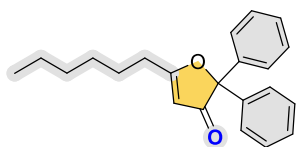

**2ar**

$^1\text{H}$  NMR spectrum was recorded on 400 MHz in  $\text{CDCl}_3$ .

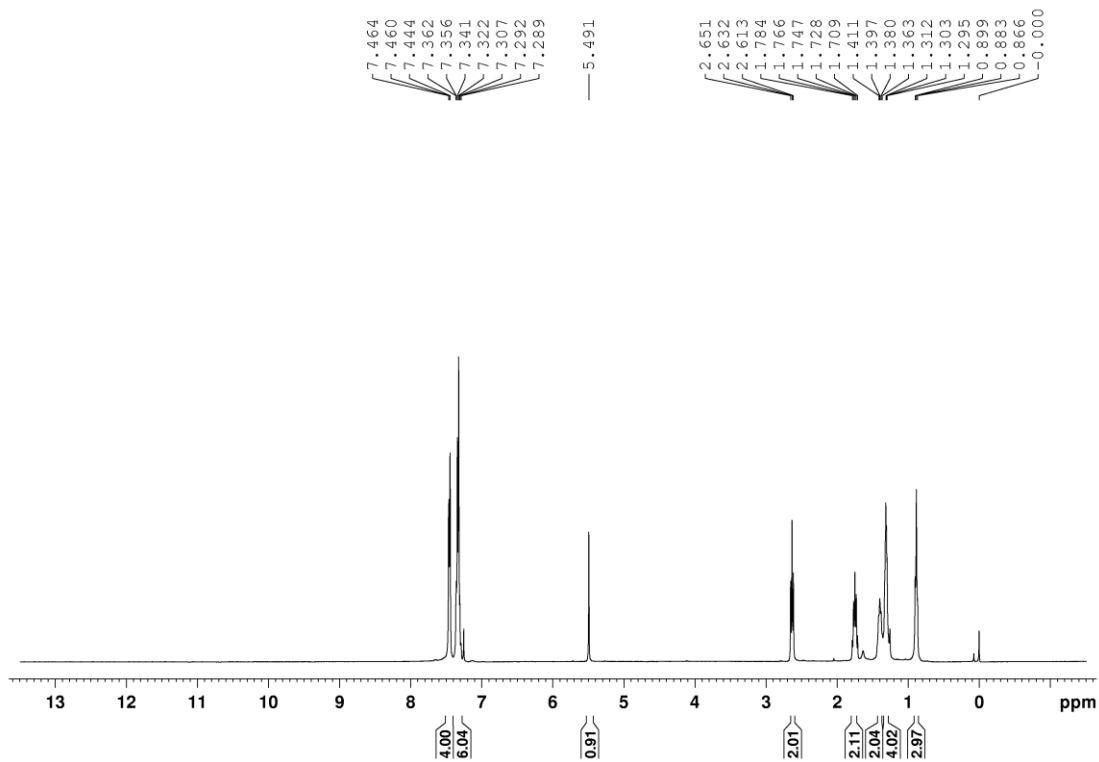

$^{13}\text{C}\{^1\text{H}\}$  NMR spectrum was recorded on 151 MHz in  $\text{CDCl}_3$ .

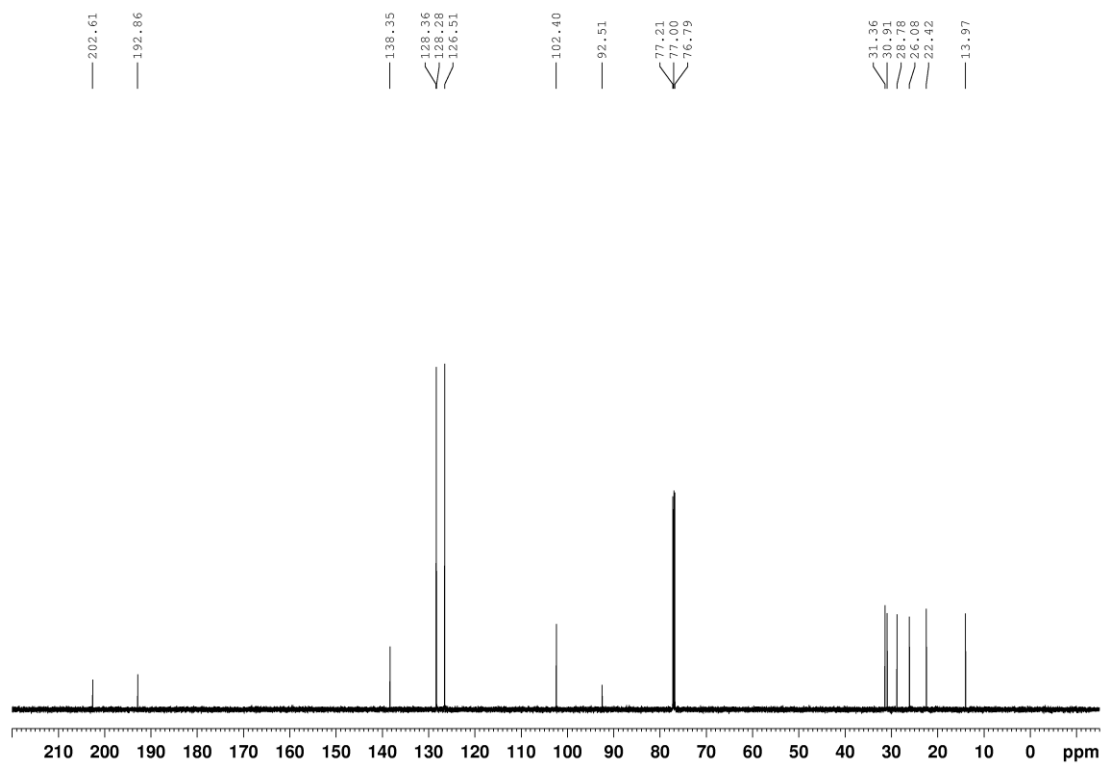

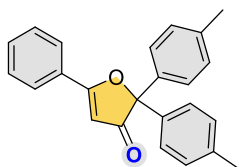

2ba

$^1\text{H}$  NMR spectrum was recorded on 400 MHz in  $\text{CDCl}_3$ .

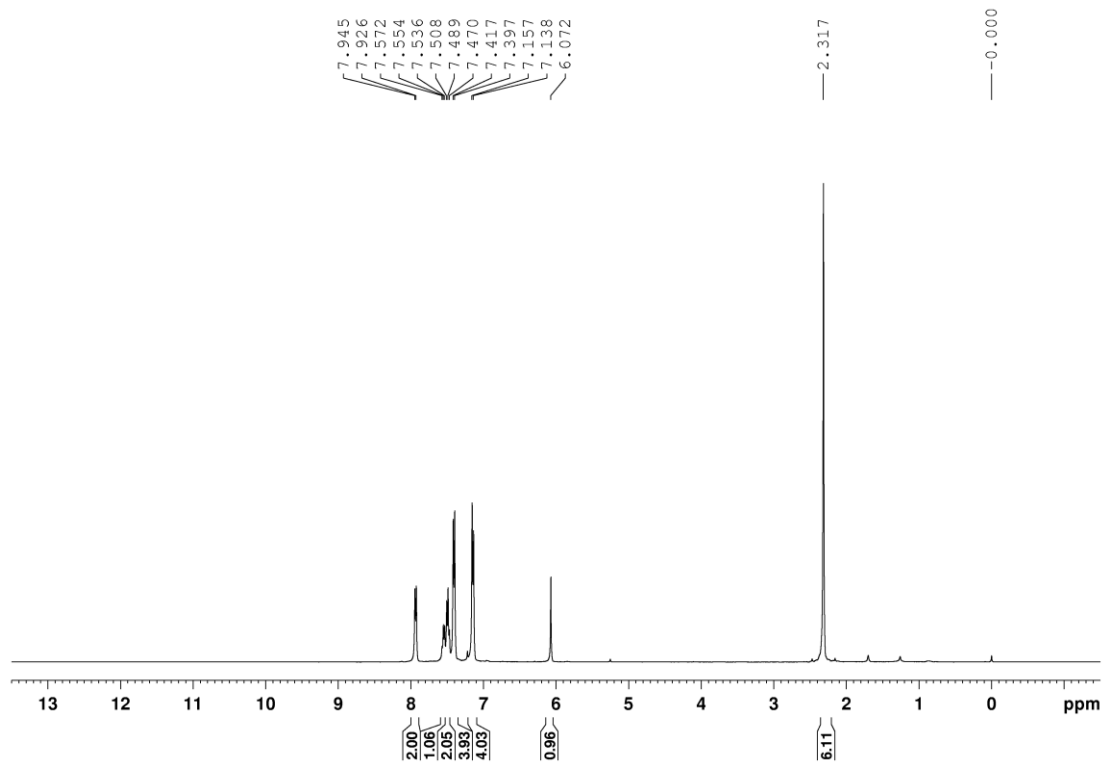

$^{13}\text{C}\{^1\text{H}\}$  NMR spectrum was recorded on 151 MHz in  $\text{CDCl}_3$ .

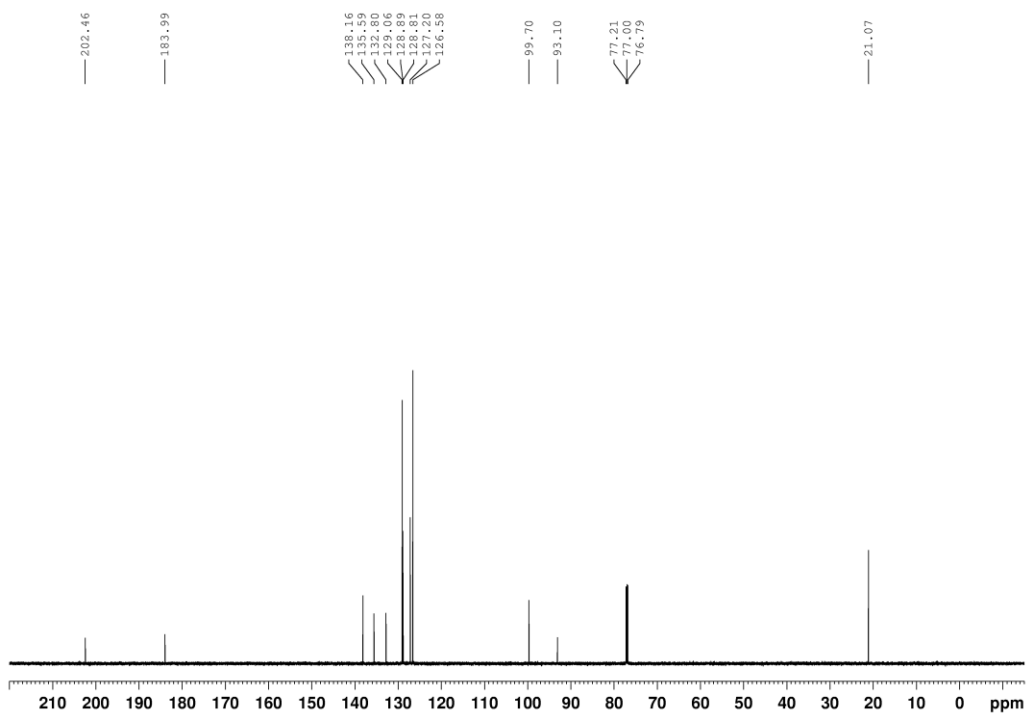



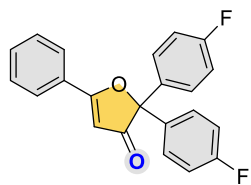

**2bb**

$^1\text{H}$  NMR spectrum was recorded on 400 MHz in  $\text{CDCl}_3$ .

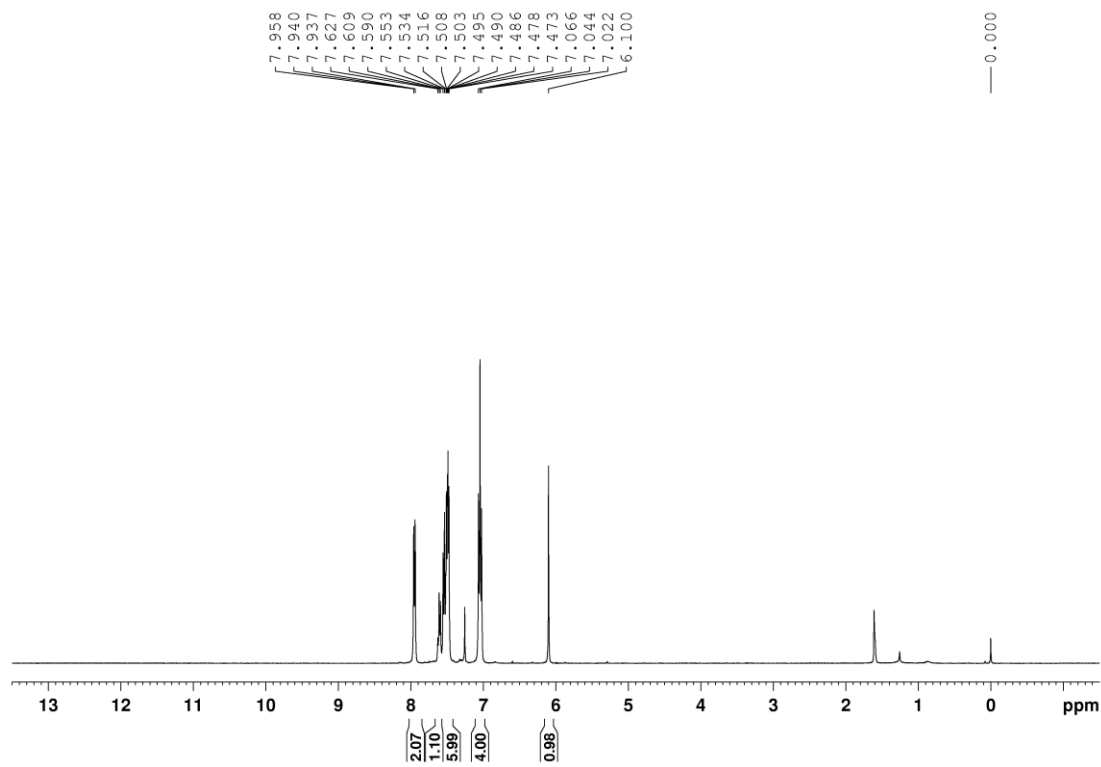

$^{13}\text{C}\{^1\text{H}\}$  NMR spectrum was recorded on 151 MHz in  $\text{CDCl}_3$ .

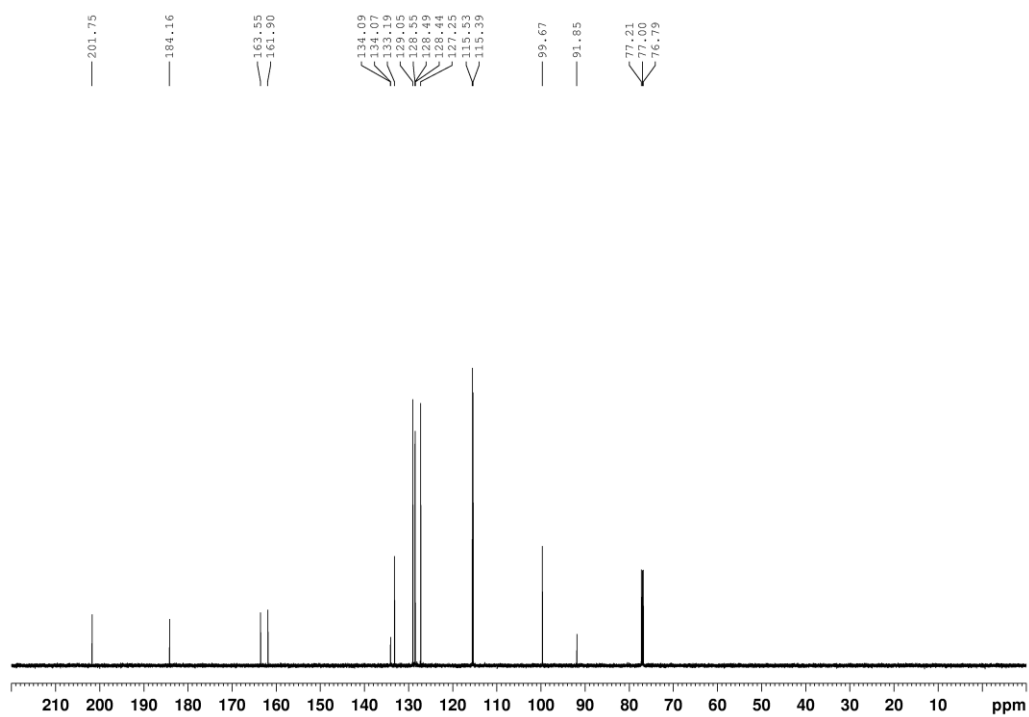

<sup>19</sup>F spectrum was recorded on 376 MHz in CDCl<sub>3</sub>.

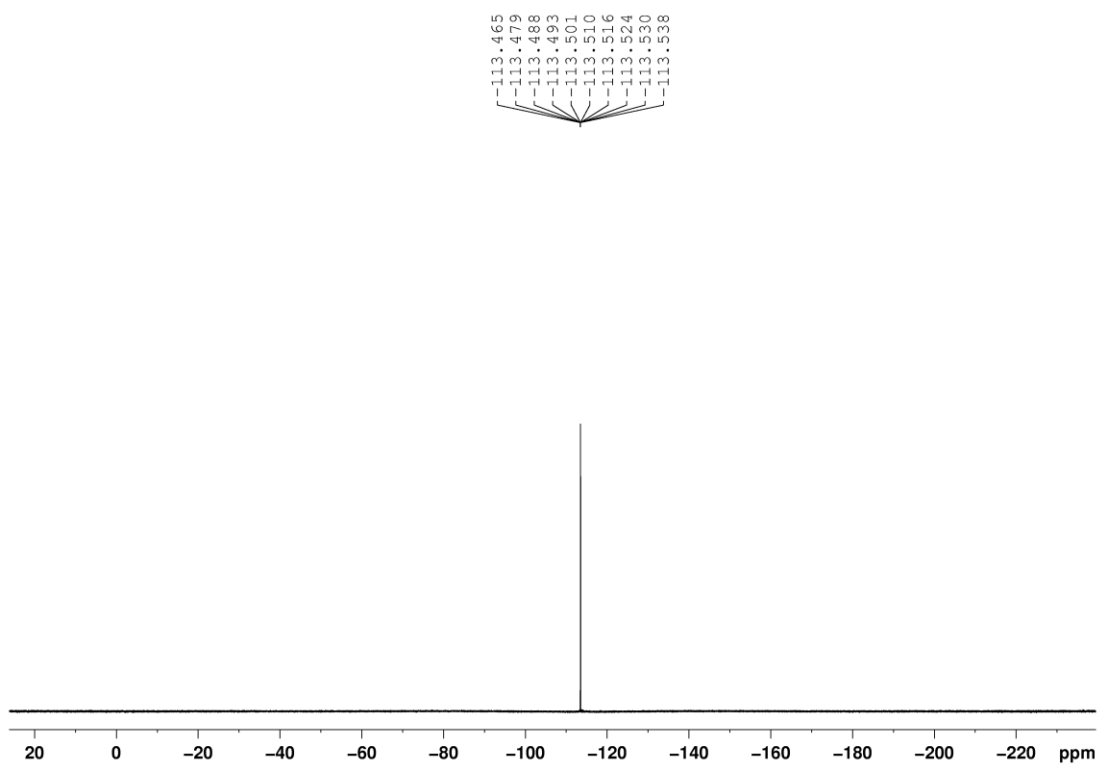

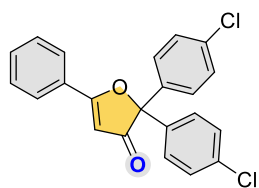

**2bc**

$^1\text{H}$  NMR spectrum was recorded on 400 MHz in  $\text{CDCl}_3$ .

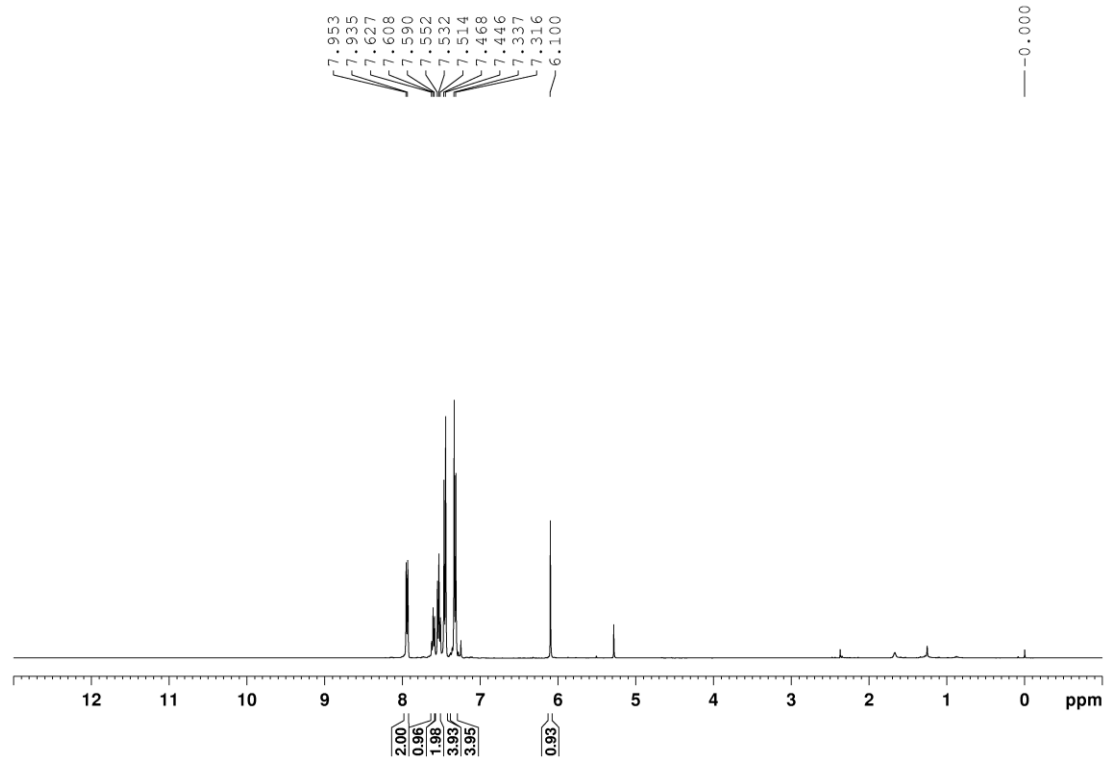

$^{13}\text{C}\{^1\text{H}\}$  NMR spectrum was recorded on 151 MHz in  $\text{CDCl}_3$ .

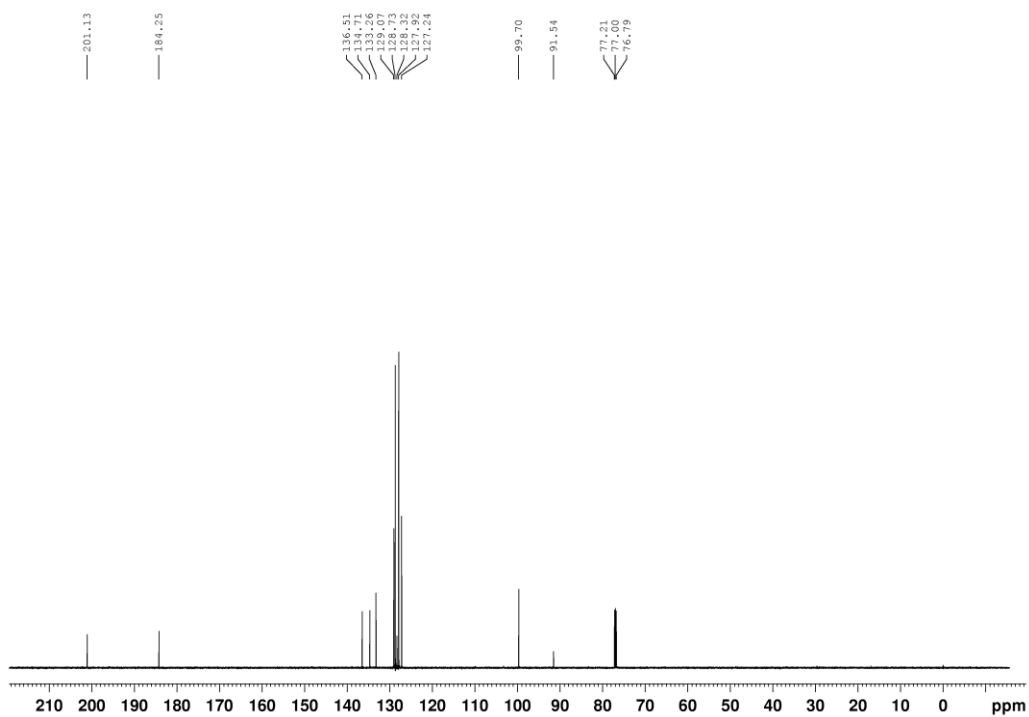

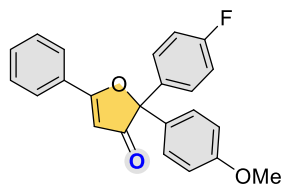

**2bd**

$^1\text{H}$  NMR spectrum was recorded on 600 MHz in  $\text{CDCl}_3$ .

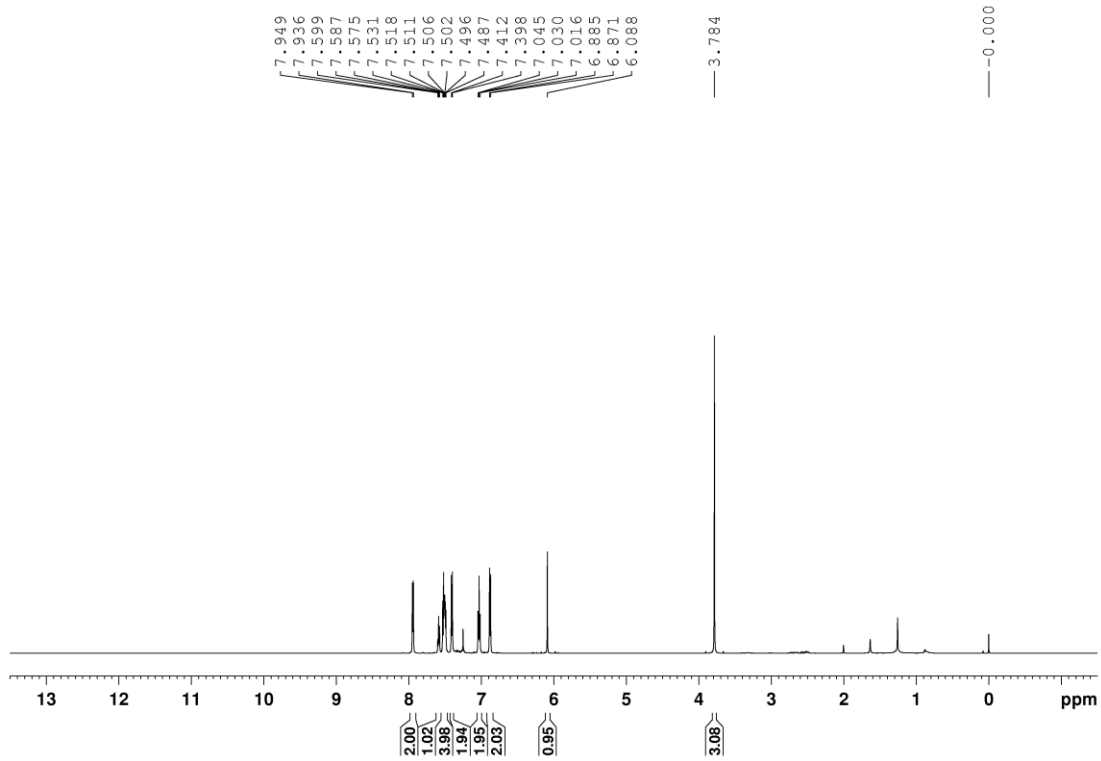

$^{13}\text{C}\{^1\text{H}\}$  NMR spectrum was recorded on 151 MHz in  $\text{CDCl}_3$ .

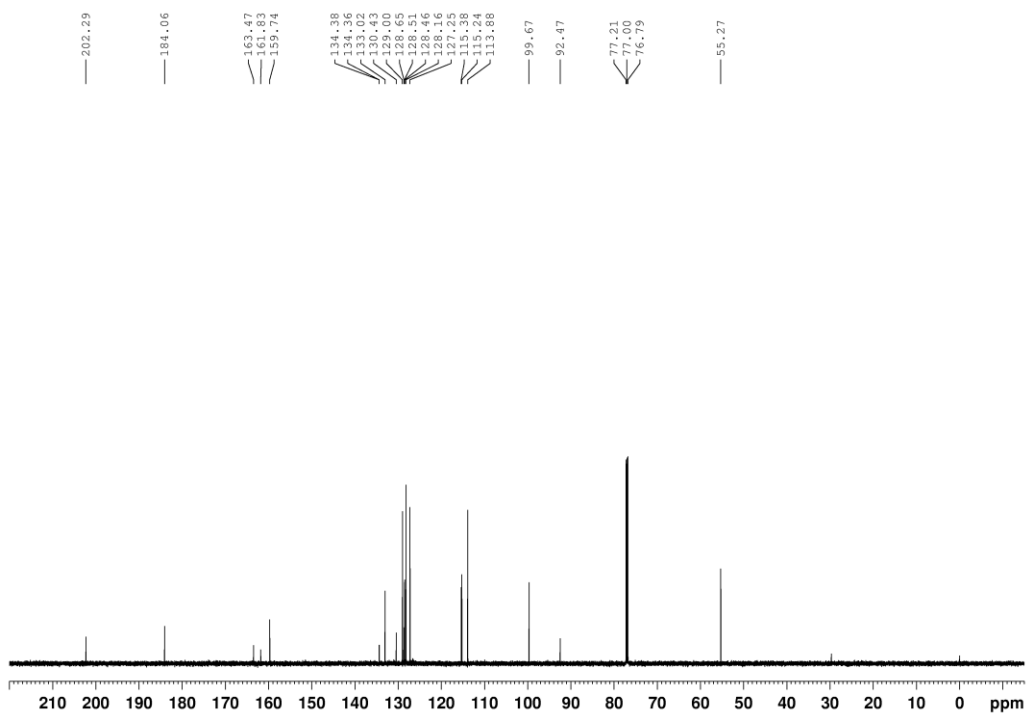

$^{19}\text{F}$  spectrum was recorded on 376 MHz in  $\text{CDCl}_3$ .

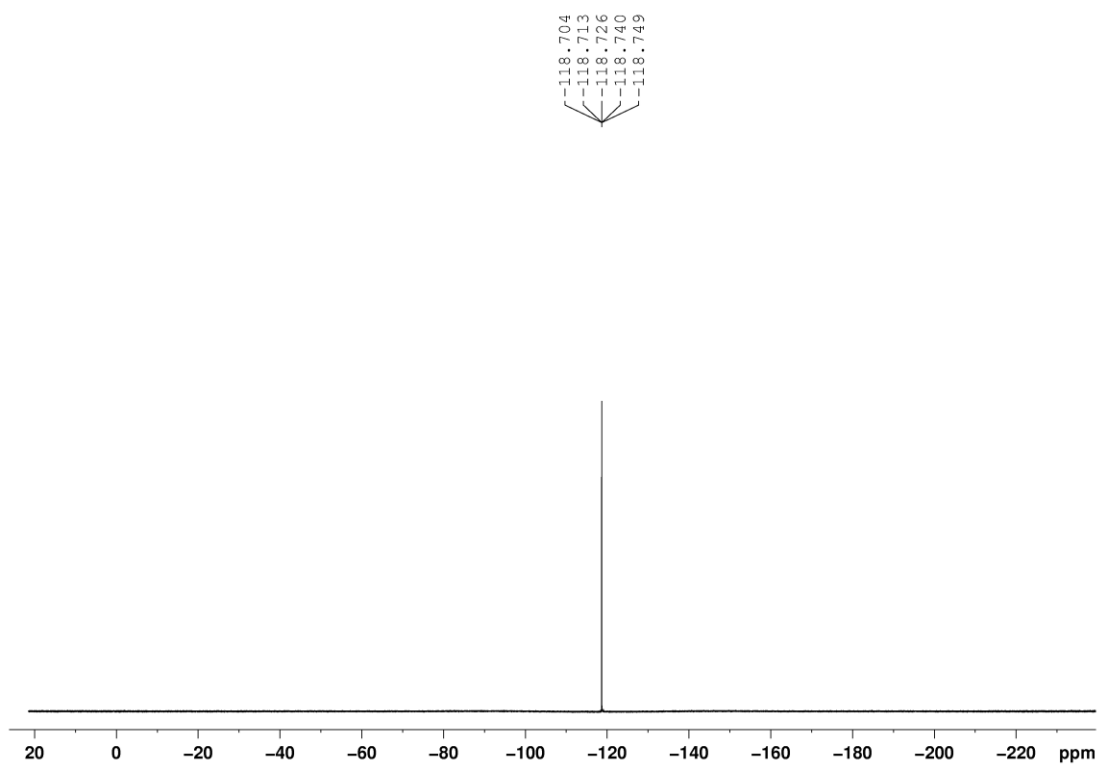

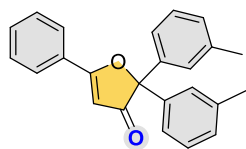

**2be**

$^1\text{H}$  NMR spectrum was recorded on 400 MHz in  $\text{CDCl}_3$ .

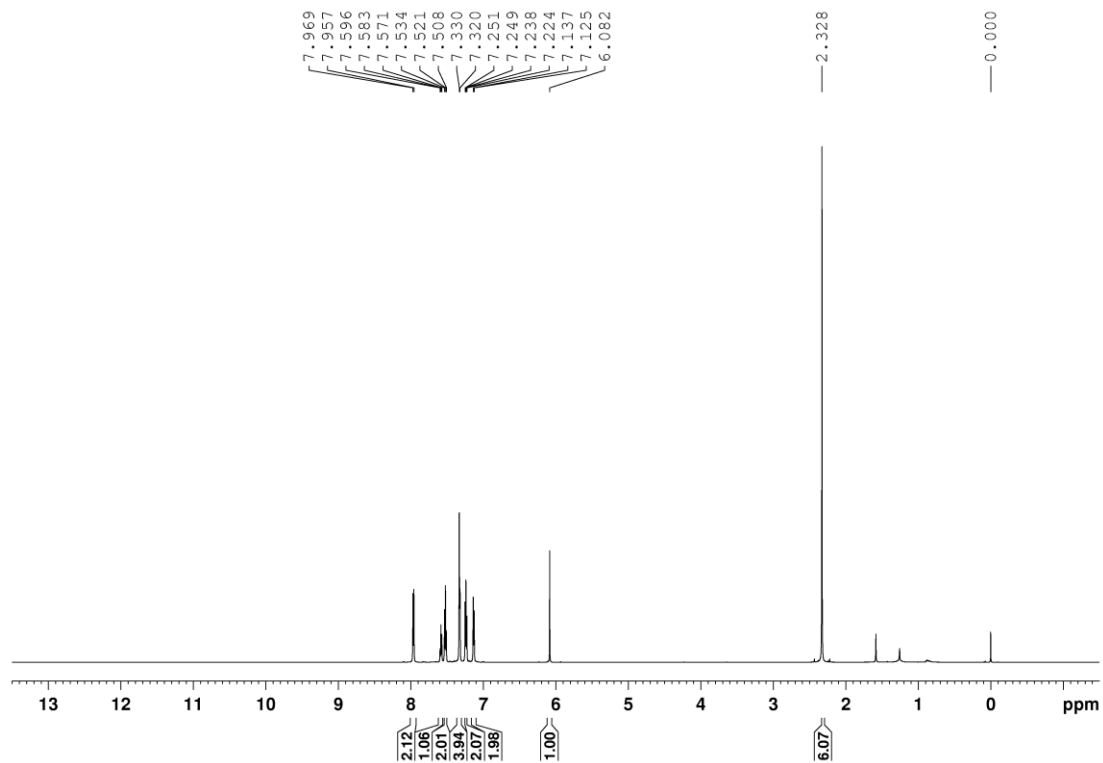

$^{13}\text{C}\{^1\text{H}\}$  NMR spectrum was recorded on 151 MHz in  $\text{CDCl}_3$ .

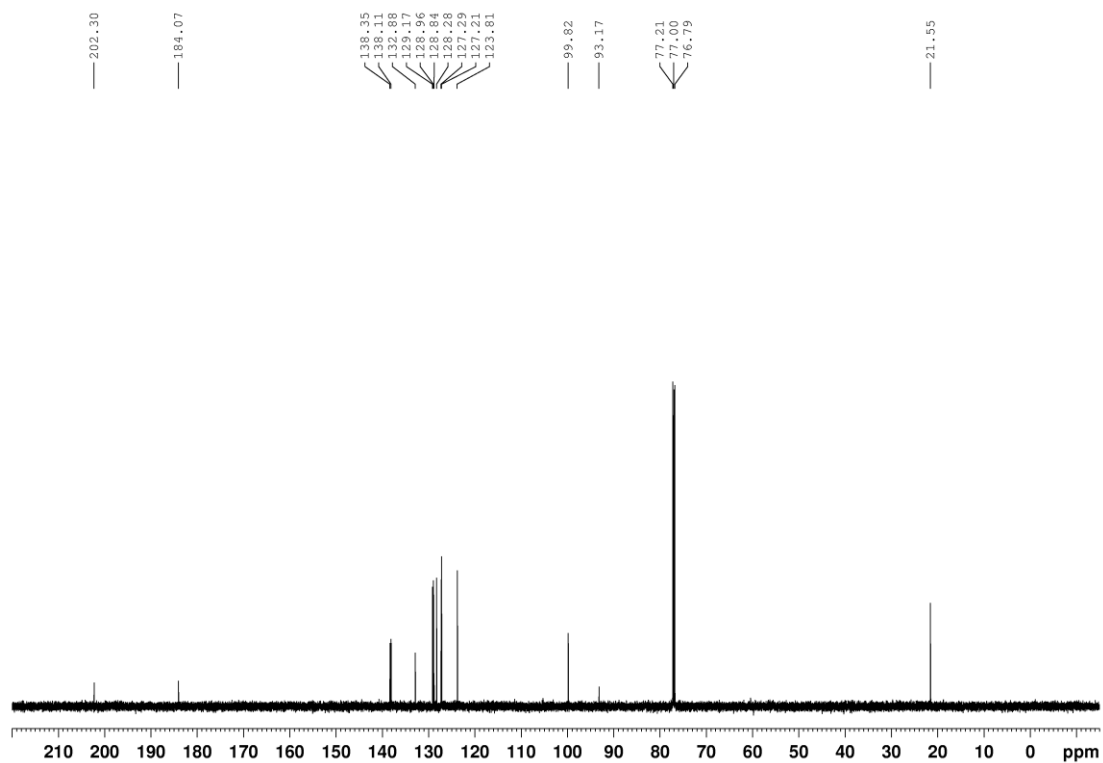

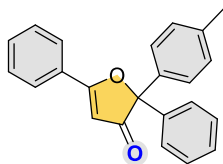

**2b**

<sup>1</sup>H NMR spectrum was recorded on 600 MHz in CDCl<sub>3</sub>.

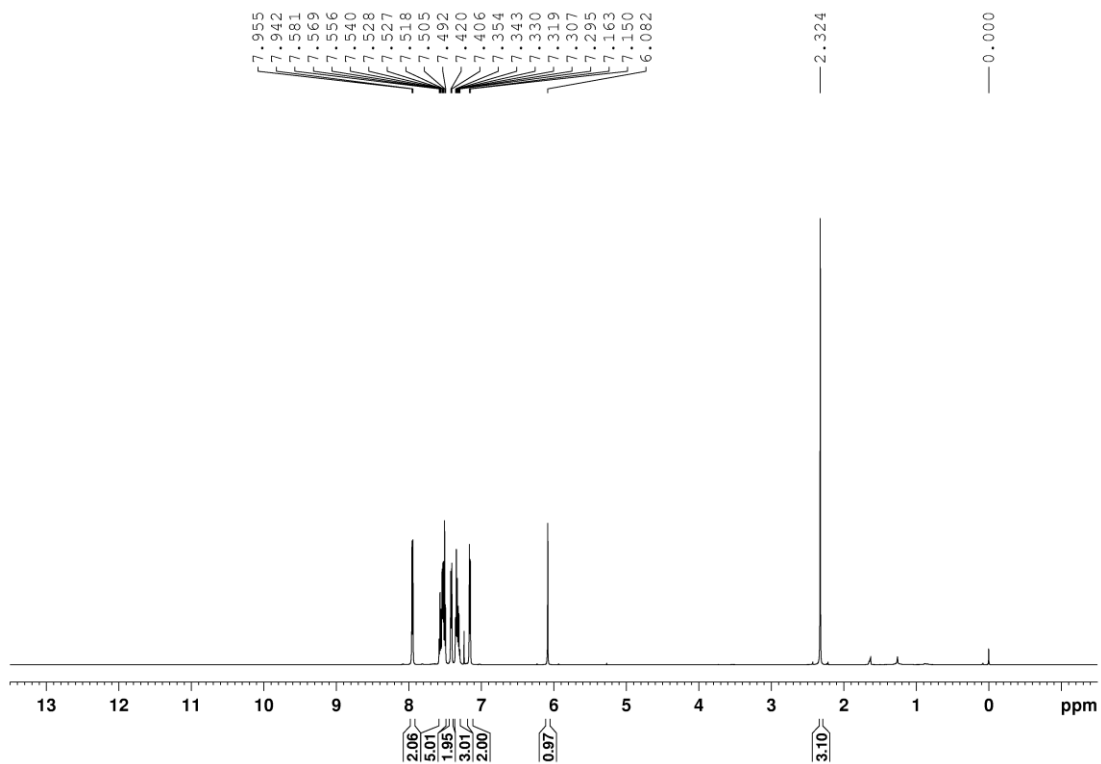

<sup>13</sup>C{H} NMR spectrum was recorded on 151 MHz in CDCl<sub>3</sub>.

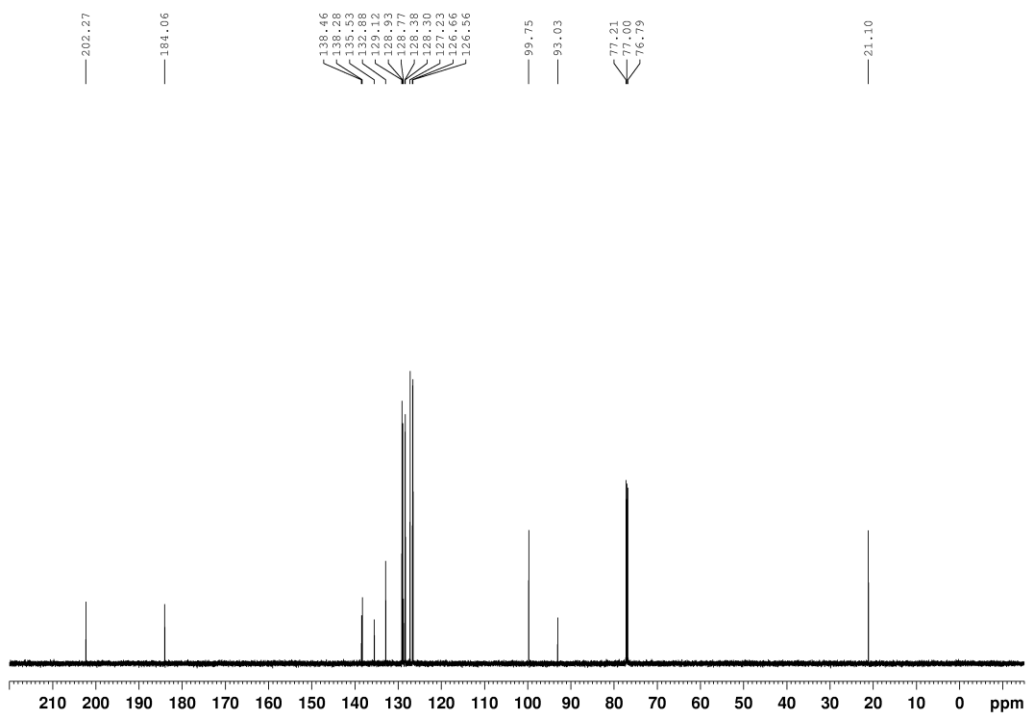

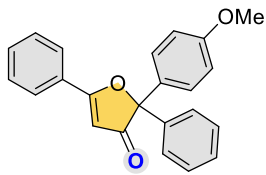

**2bg**

$^1\text{H}$  NMR spectrum was recorded on 600 MHz in  $\text{CDCl}_3$ .

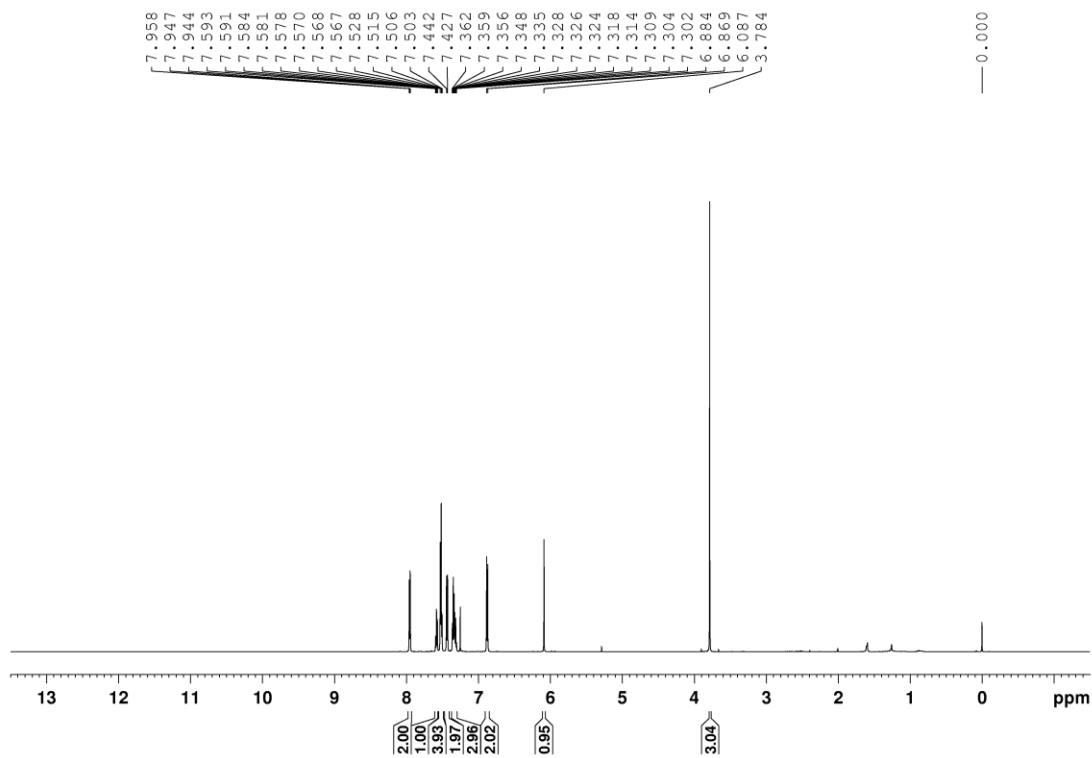

$^{13}\text{C}\{^1\text{H}\}$  NMR spectrum was recorded on 151 MHz in  $\text{CDCl}_3$ .

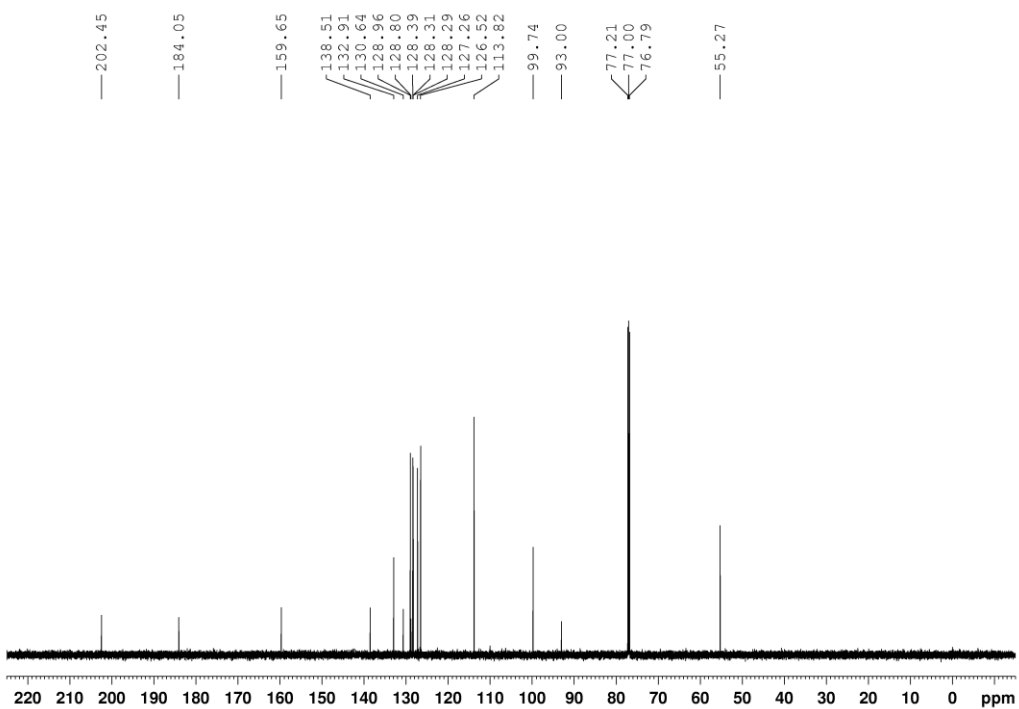



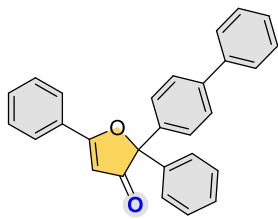

2bh

$^1\text{H}$  NMR spectrum was recorded on 400 MHz in  $\text{CDCl}_3$ .

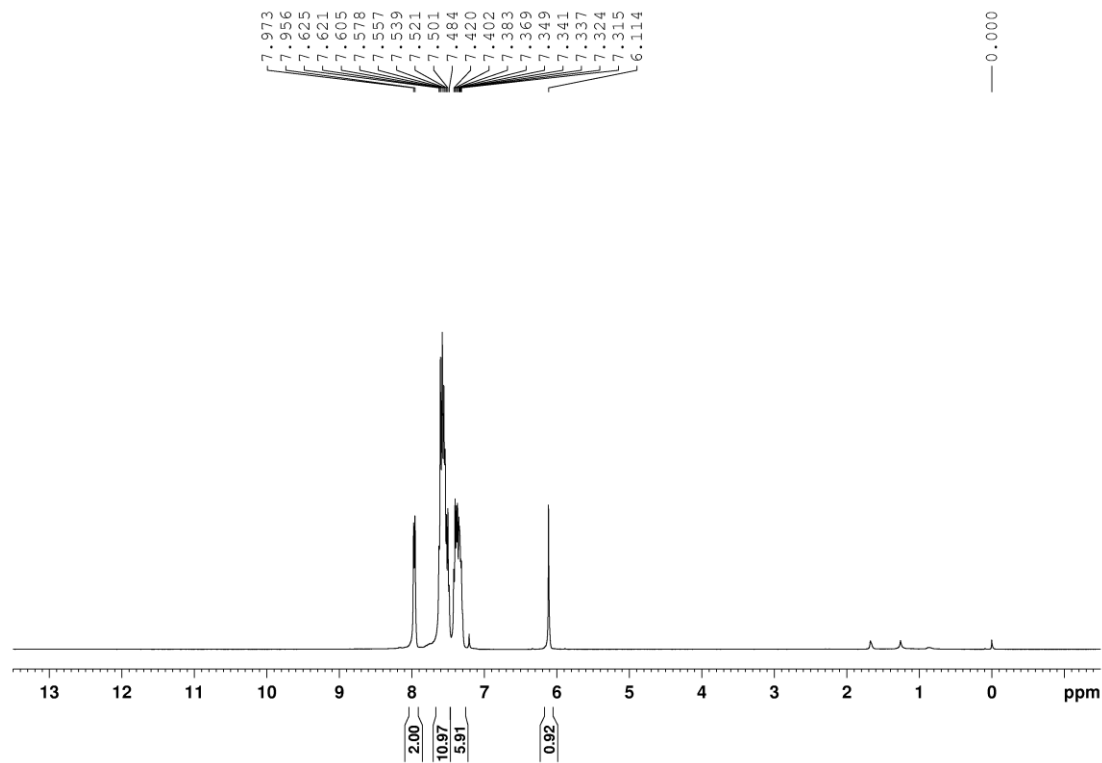

$^{13}\text{C}\{^1\text{H}\}$  NMR spectrum was recorded on 151 MHz in  $\text{CDCl}_3$ .

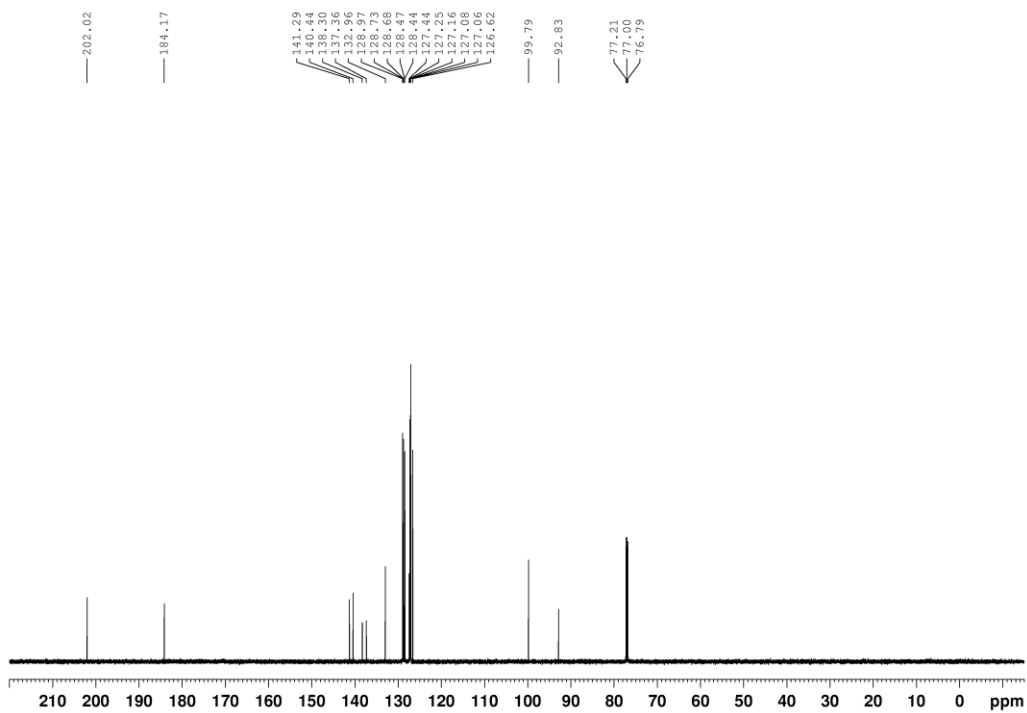

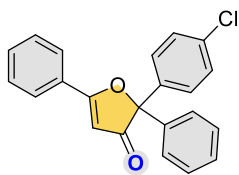

**2bi**

$^1\text{H}$  NMR spectrum was recorded on 400 MHz in  $\text{CDCl}_3$ .

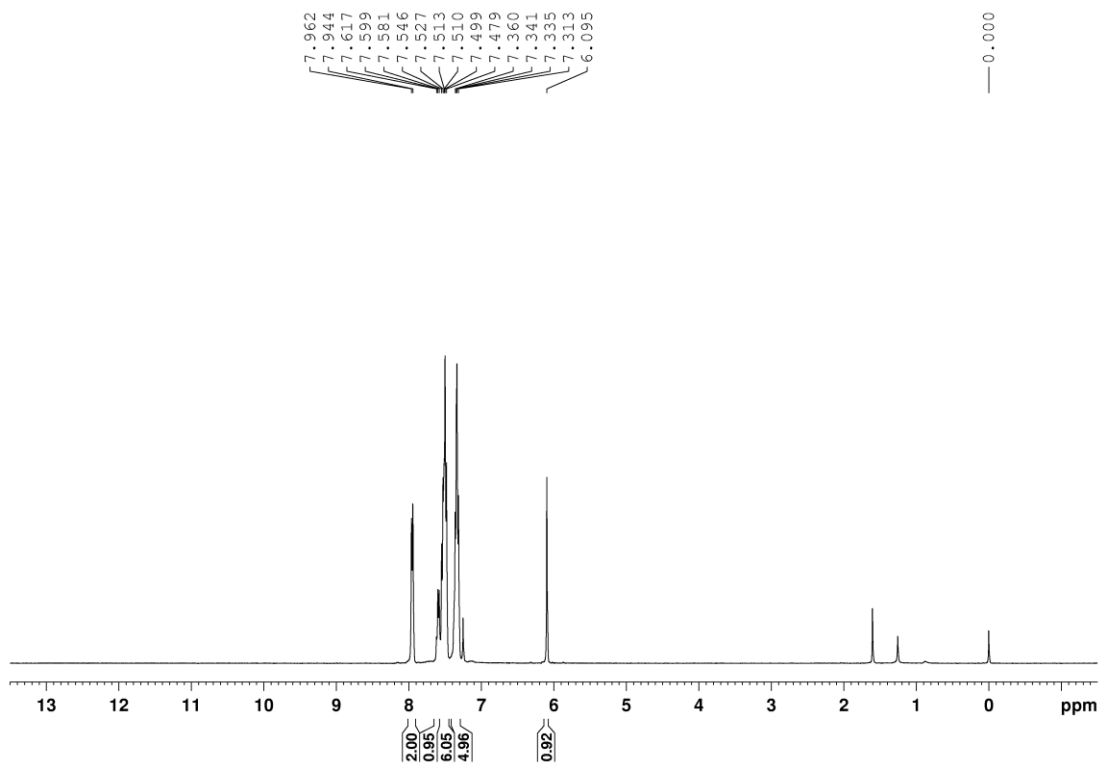

$^{13}\text{C}\{^1\text{H}\}$  NMR spectrum was recorded on 151 MHz in  $\text{CDCl}_3$ .

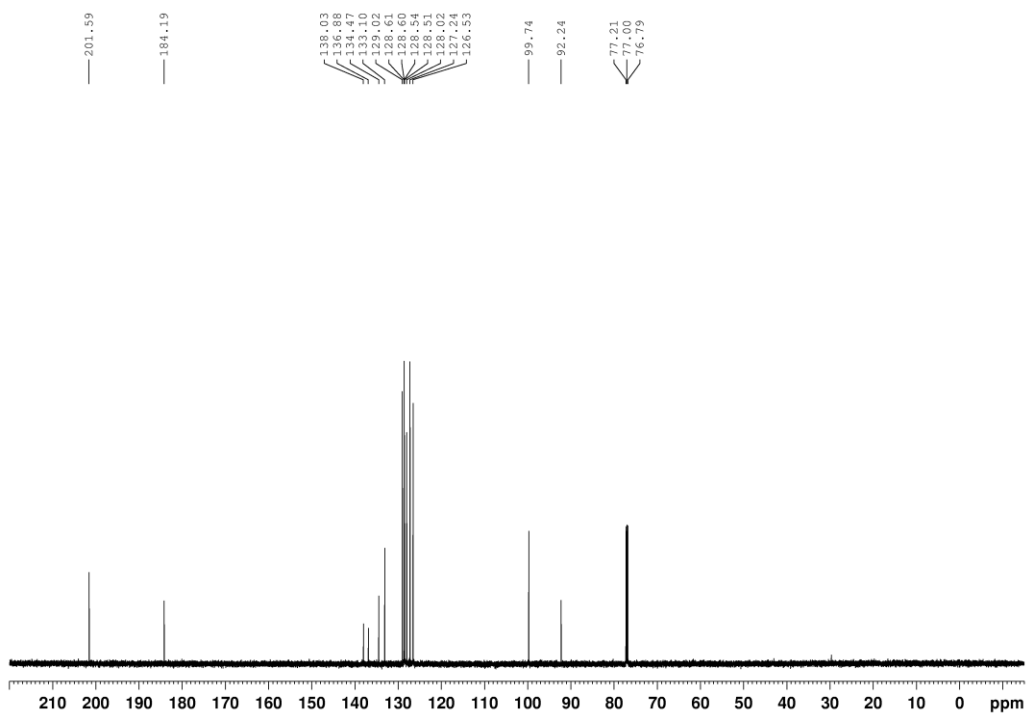

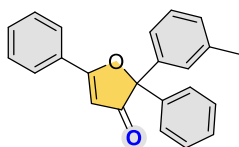

**2bj**

$^1\text{H}$  NMR spectrum was recorded on 400 MHz in  $\text{CDCl}_3$ .

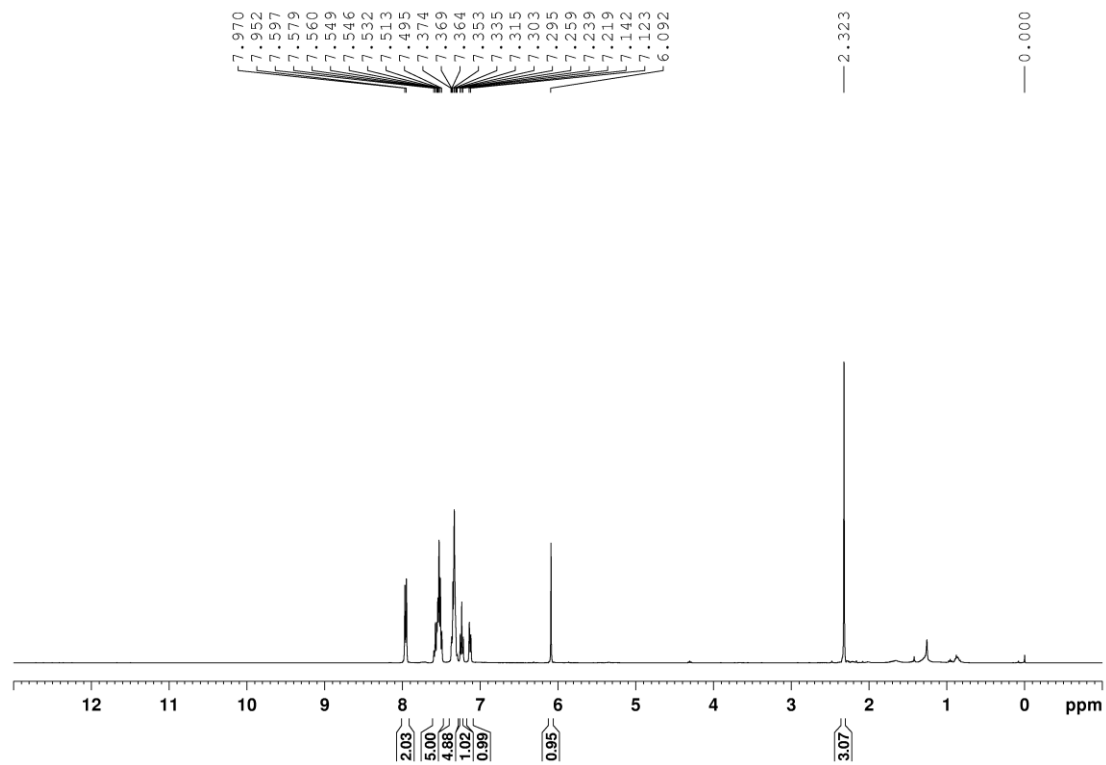

$^{13}\text{C}\{^1\text{H}\}$  NMR spectrum was recorded on 151 MHz in  $\text{CDCl}_3$ .

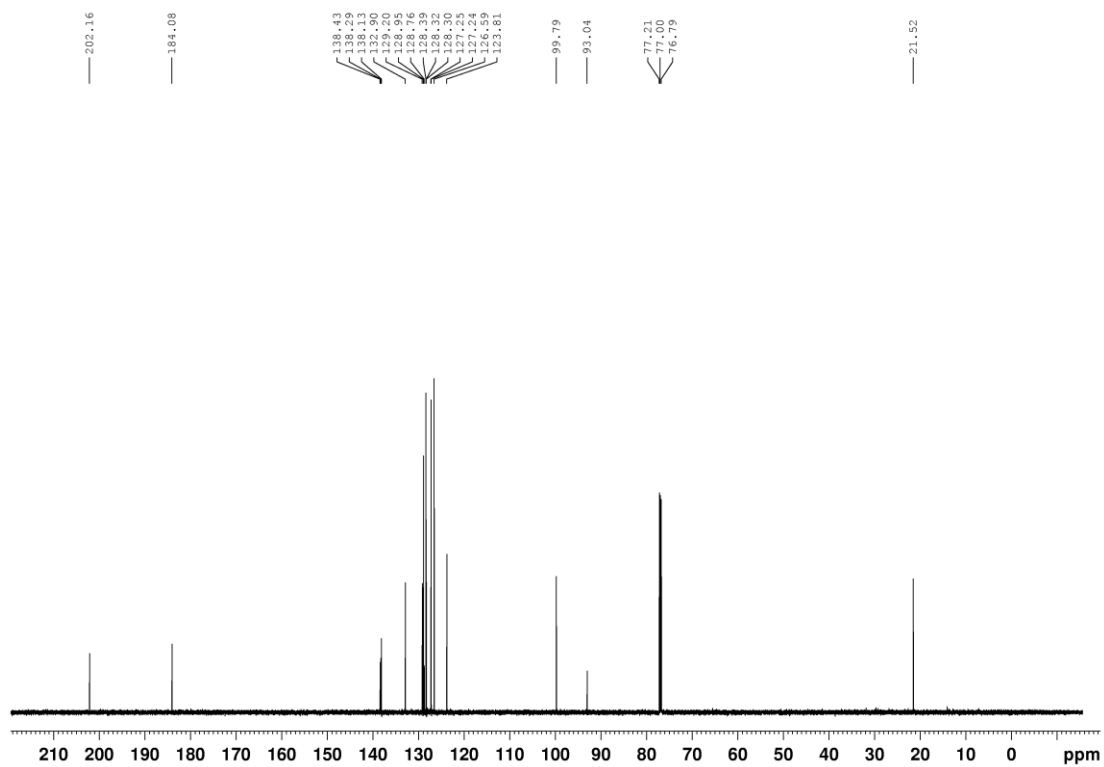

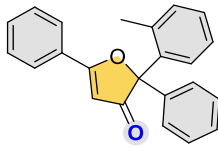

**2bk**

<sup>1</sup>H NMR spectrum was recorded on 400 MHz in CDCl<sub>3</sub>.

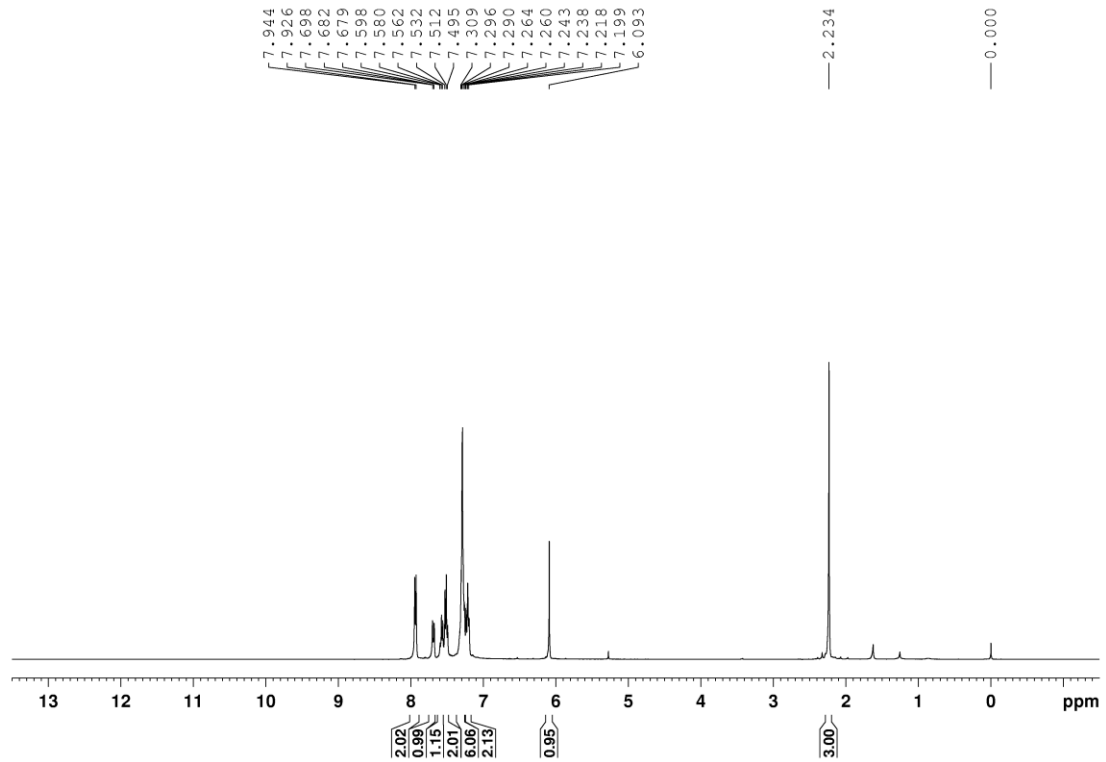

<sup>13</sup>C{<sup>1</sup>H} NMR spectrum was recorded on 151 MHz in CDCl<sub>3</sub>.

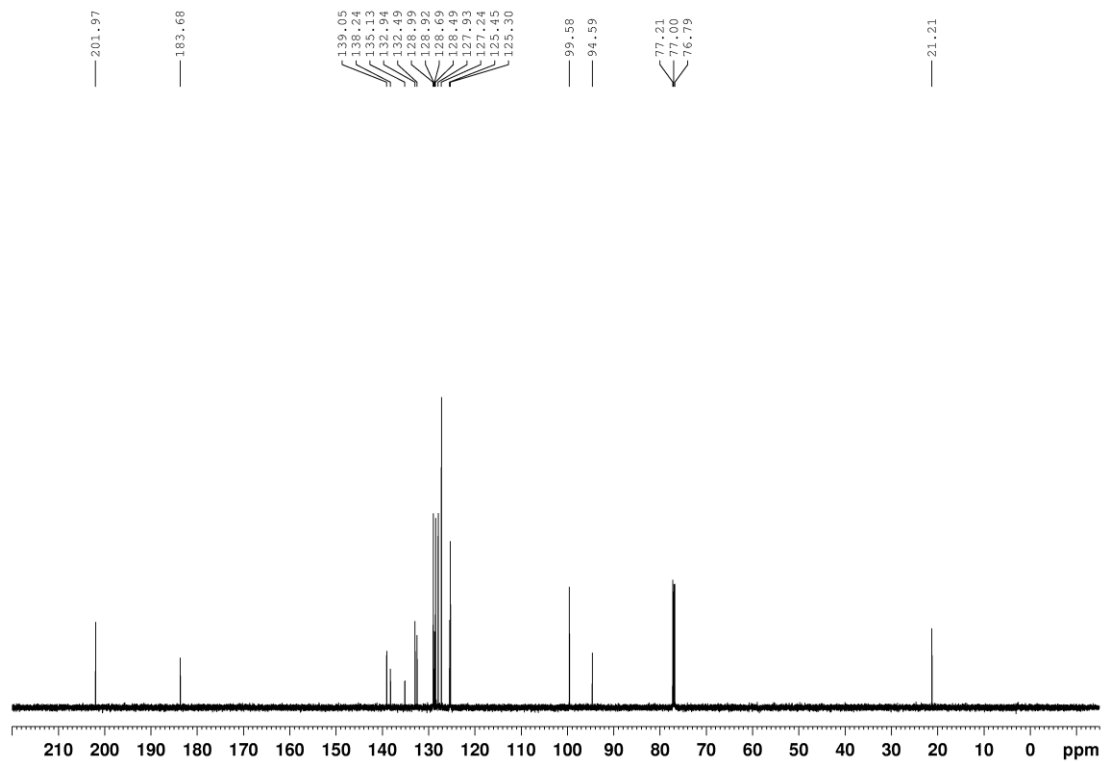

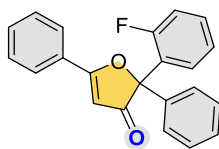

**2bl**

<sup>1</sup>H NMR spectrum was recorded on 600 MHz in CDCl<sub>3</sub>.

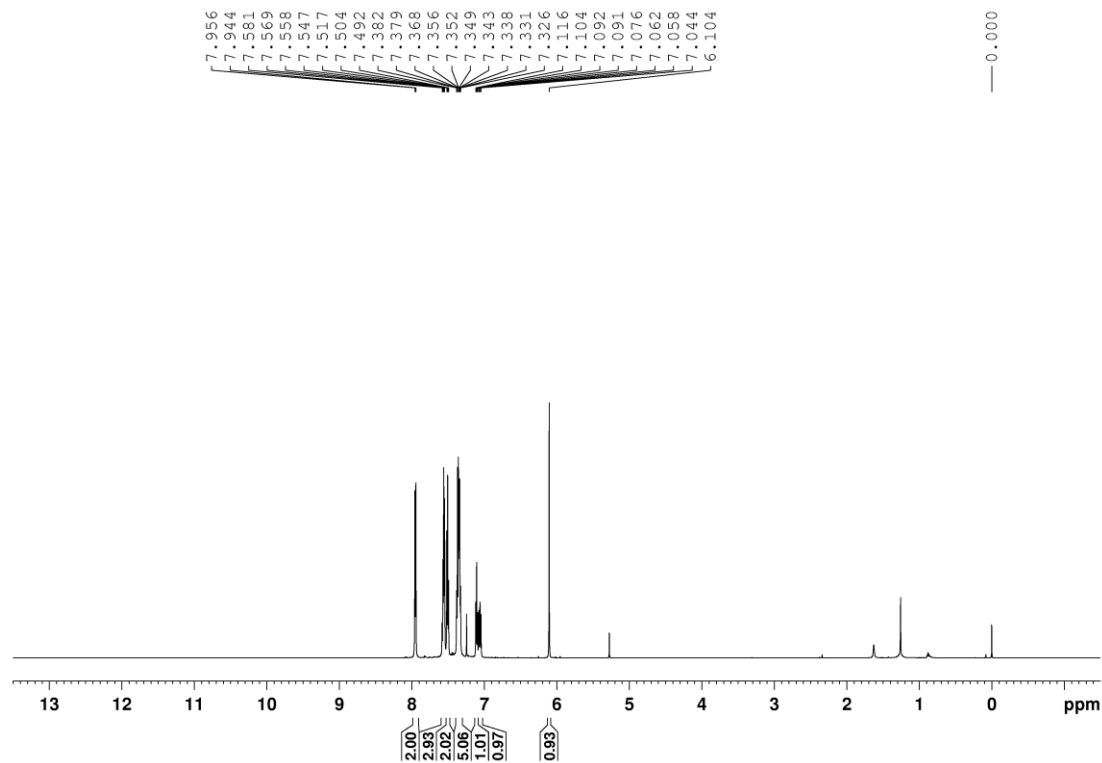

<sup>13</sup>C{H} NMR spectrum was recorded on 151 MHz in CDCl<sub>3</sub>.

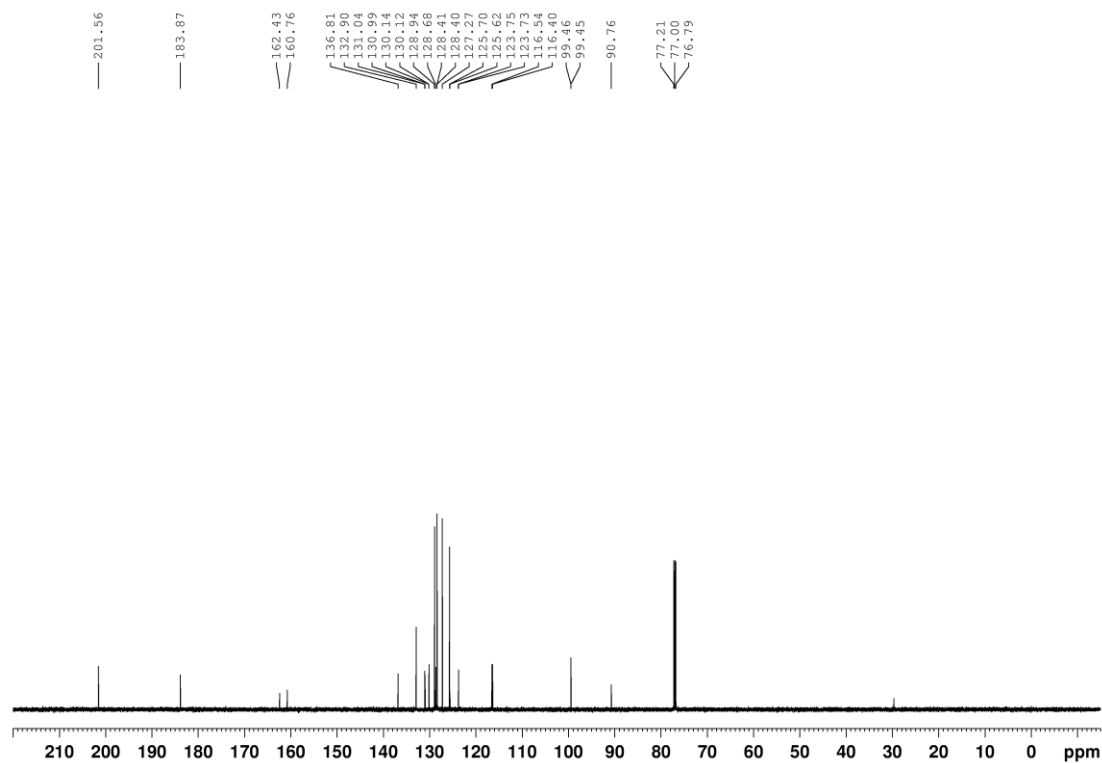

<sup>19</sup>F spectrum was recorded on 376 MHz in CDCl<sub>3</sub>.

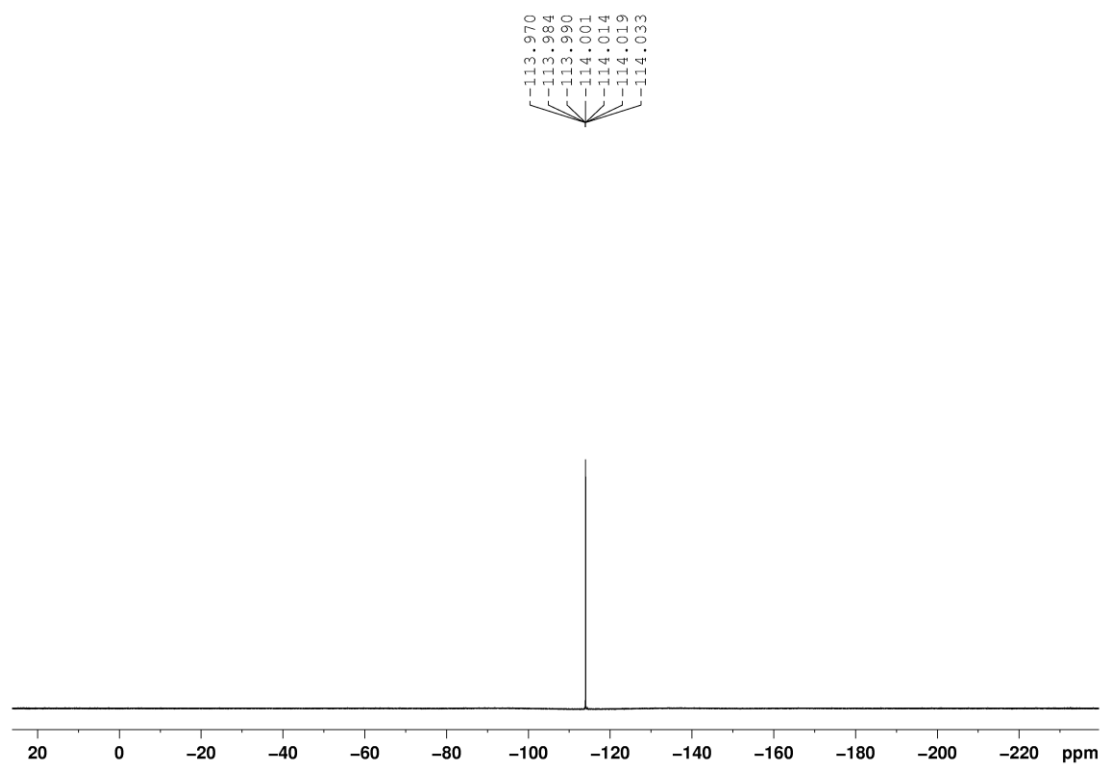

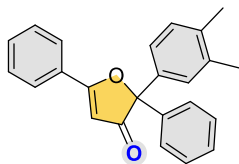

**2bm**

<sup>1</sup>H NMR spectrum was recorded on 400 MHz in CDCl<sub>3</sub>.

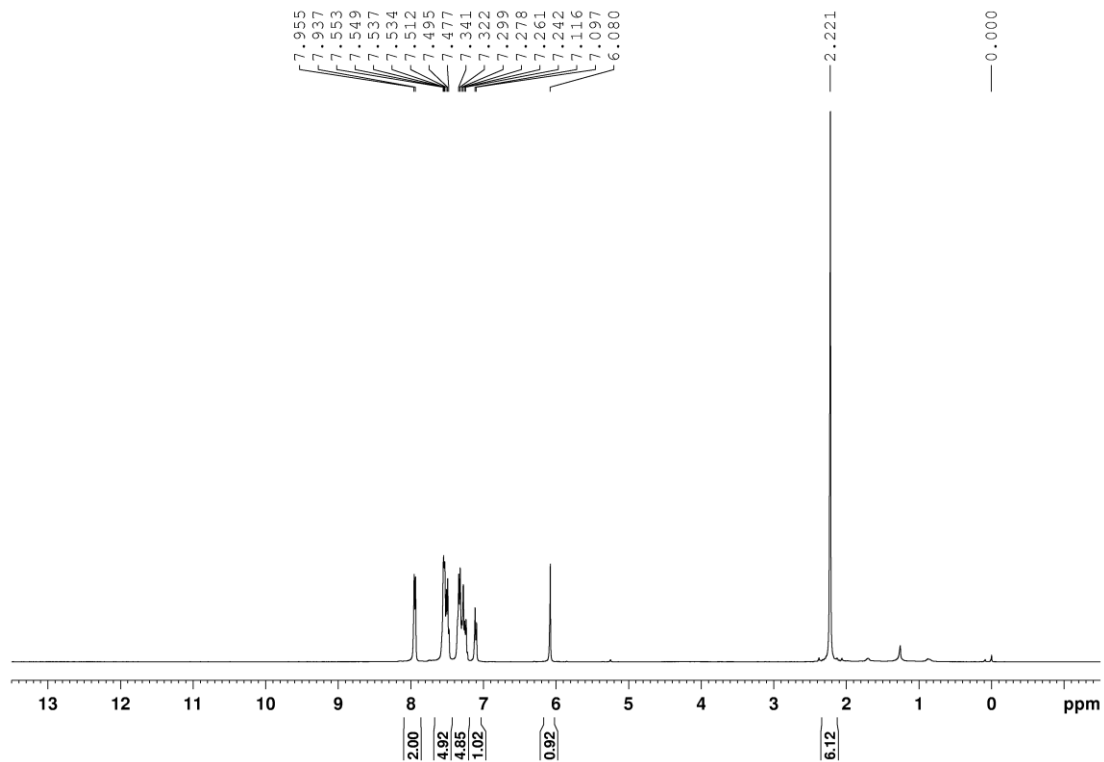

<sup>13</sup>C{<sup>1</sup>H} NMR spectrum was recorded on 151 MHz in CDCl<sub>3</sub>.

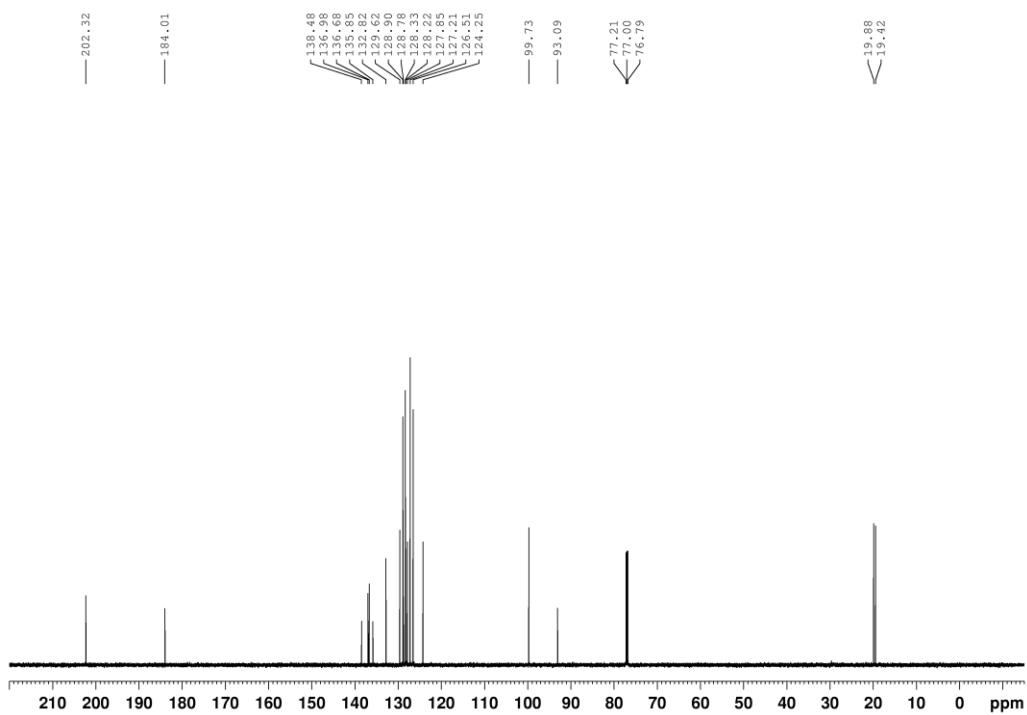

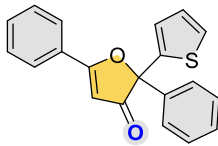

**2bn**

$^1\text{H}$  NMR spectrum was recorded on 400 MHz in  $\text{CDCl}_3$ .

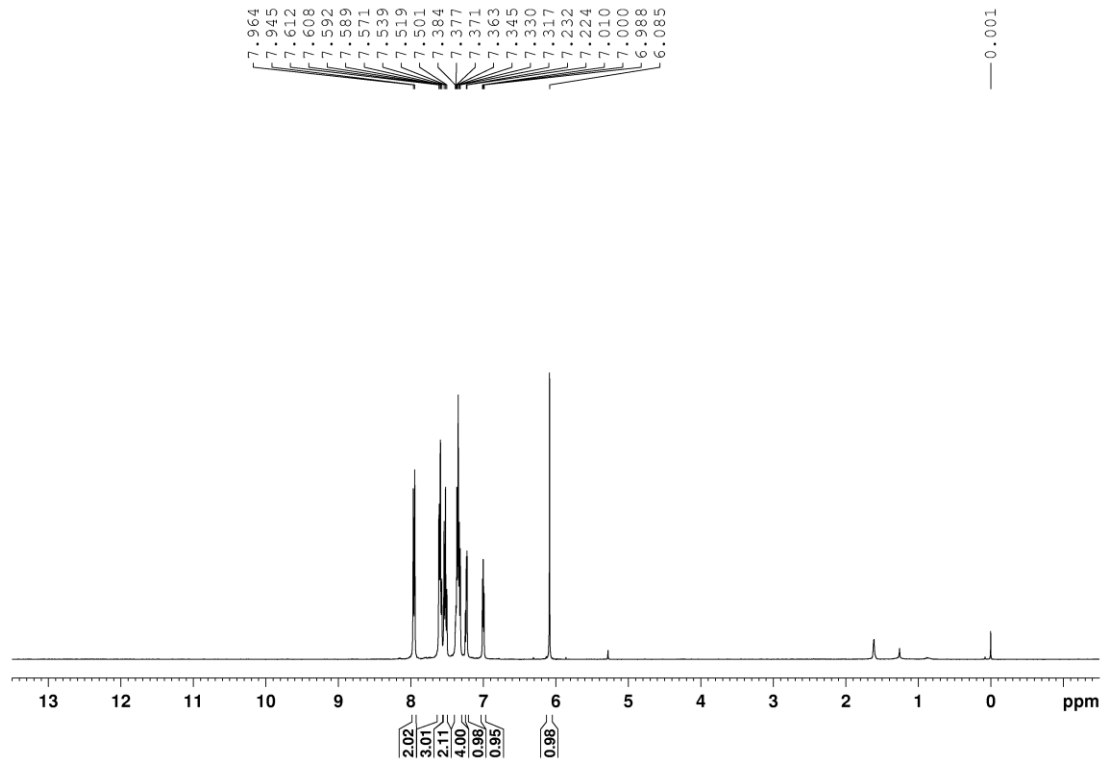

$^{13}\text{C}\{\text{H}\}$  NMR spectrum was recorded on 151 MHz in  $\text{CDCl}_3$ .

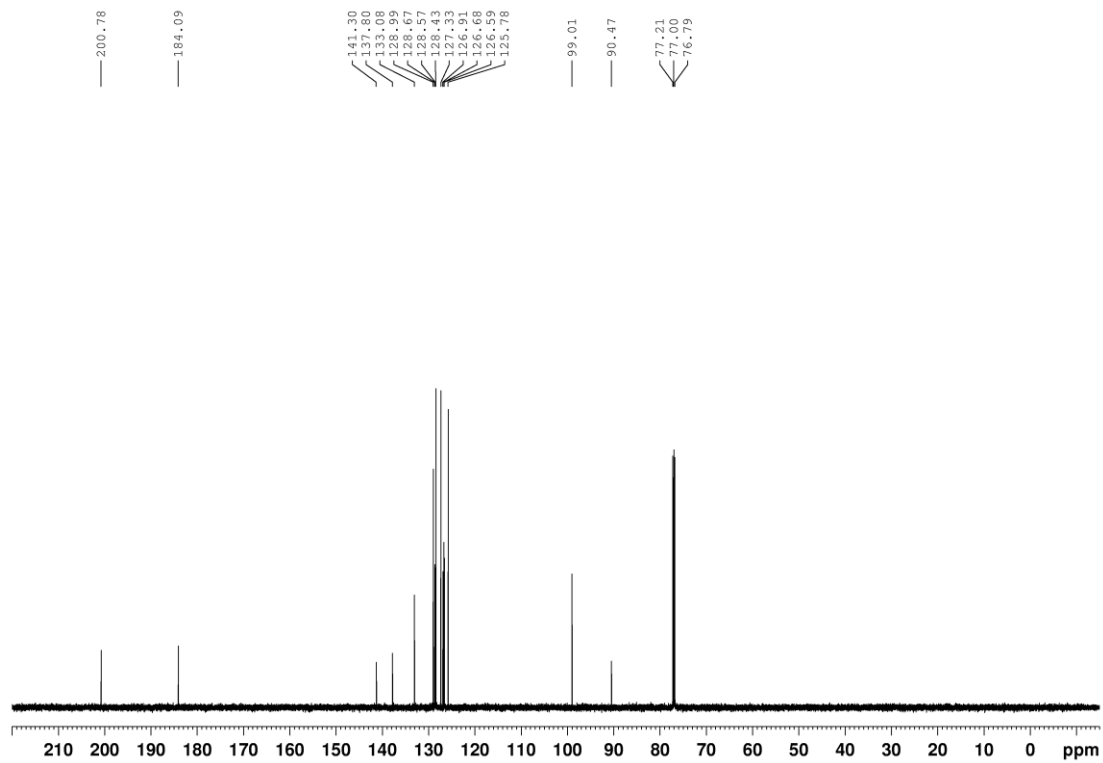



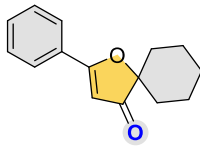

**2bo**

$^1\text{H}$  NMR spectrum was recorded on 400 MHz in  $\text{CDCl}_3$ .

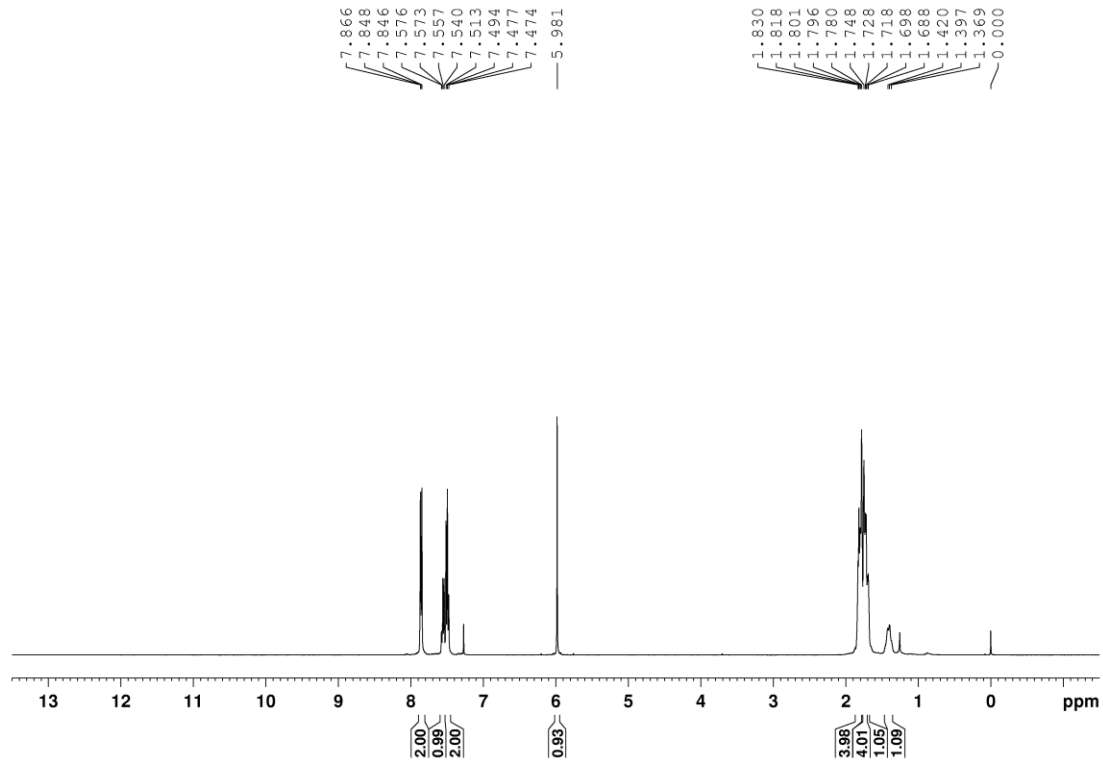

$^{13}\text{C}\{\text{H}\}$  NMR spectrum was recorded on 151 MHz in  $\text{CDCl}_3$ .

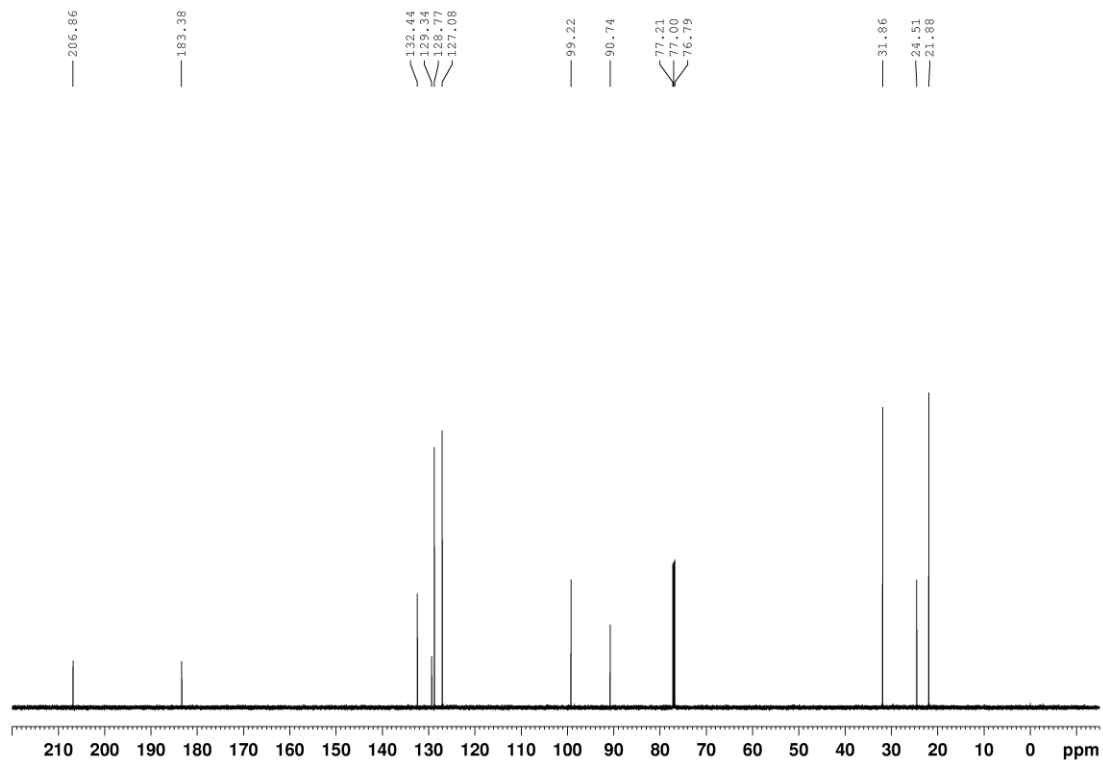

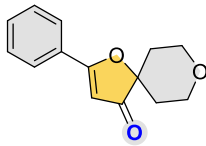

**2p**

$^1\text{H}$  NMR spectrum was recorded on 400 MHz in  $\text{CDCl}_3$ .

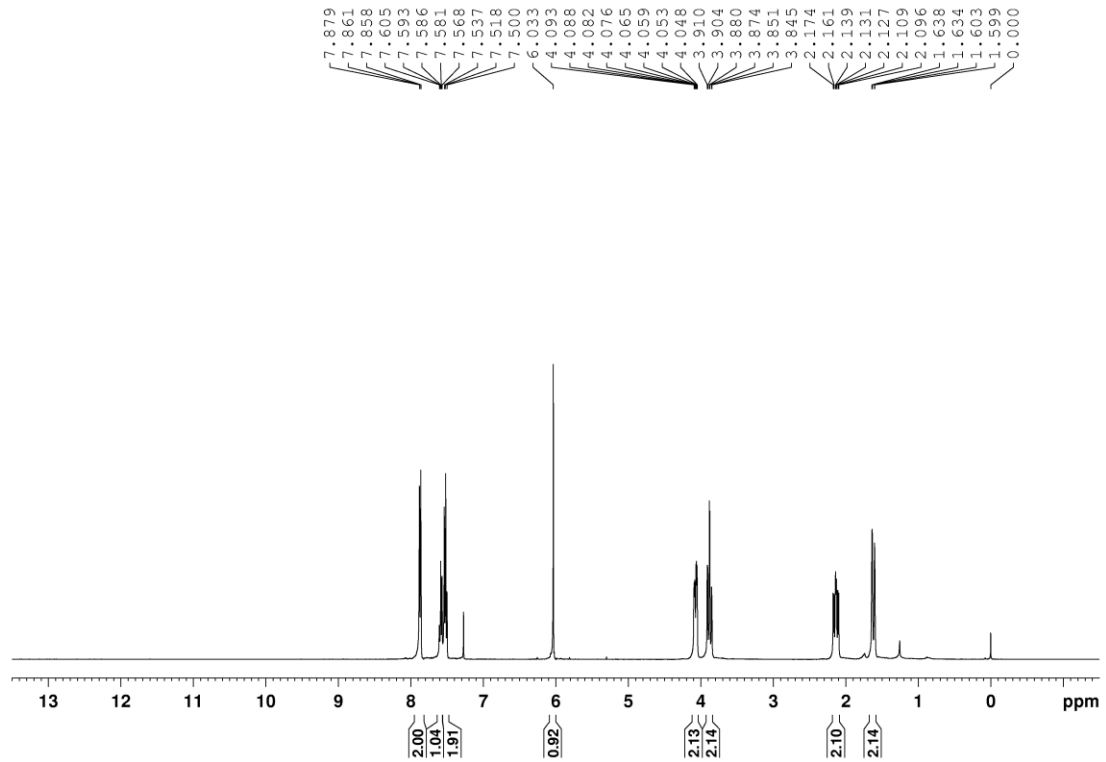

$^{13}\text{C}\{^1\text{H}\}$  NMR spectrum was recorded on 151 MHz in  $\text{CDCl}_3$ .

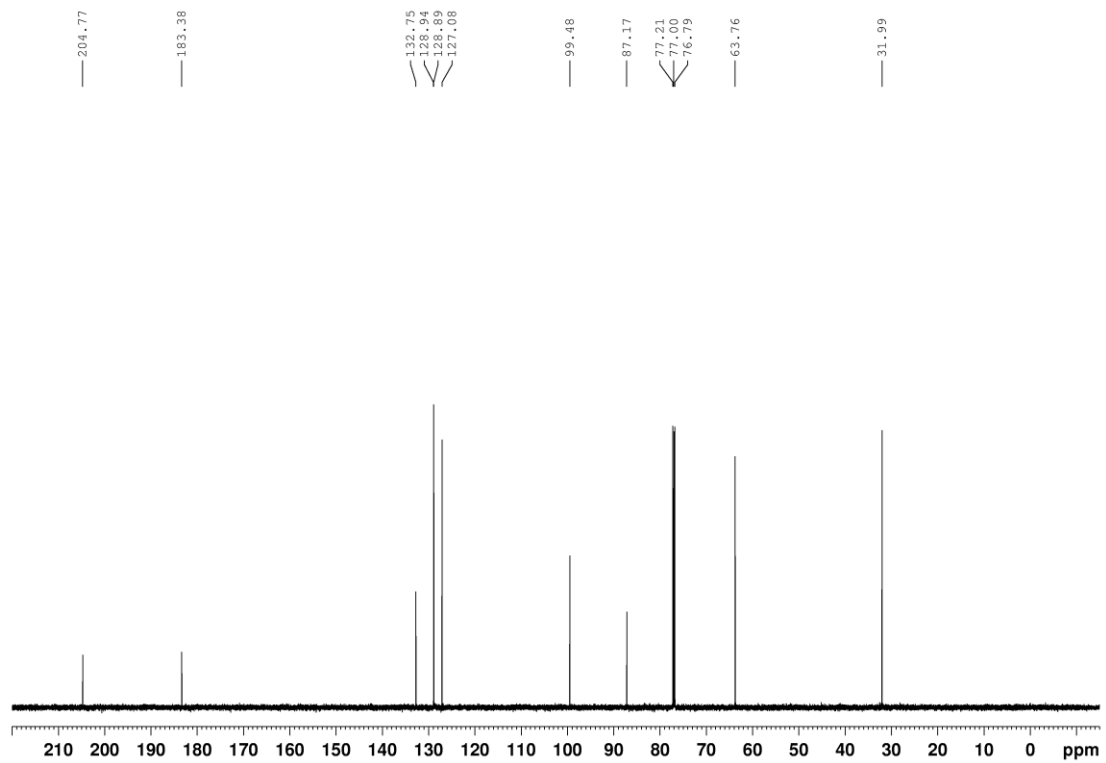

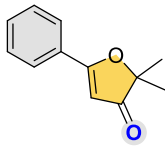

**2bq**

$^1\text{H}$  NMR spectrum was recorded on 600 MHz in  $\text{CDCl}_3$ .

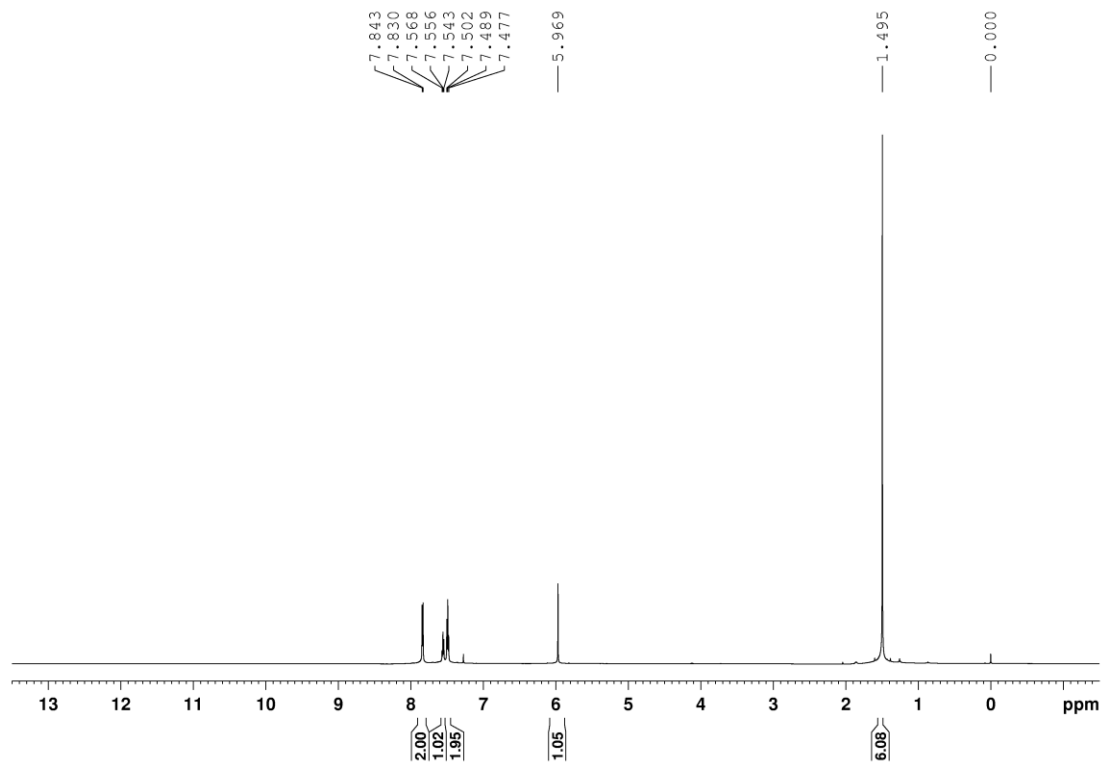

$^{13}\text{C}\{\text{H}\}$  NMR spectrum was recorded on 151 MHz in  $\text{CDCl}_3$ .

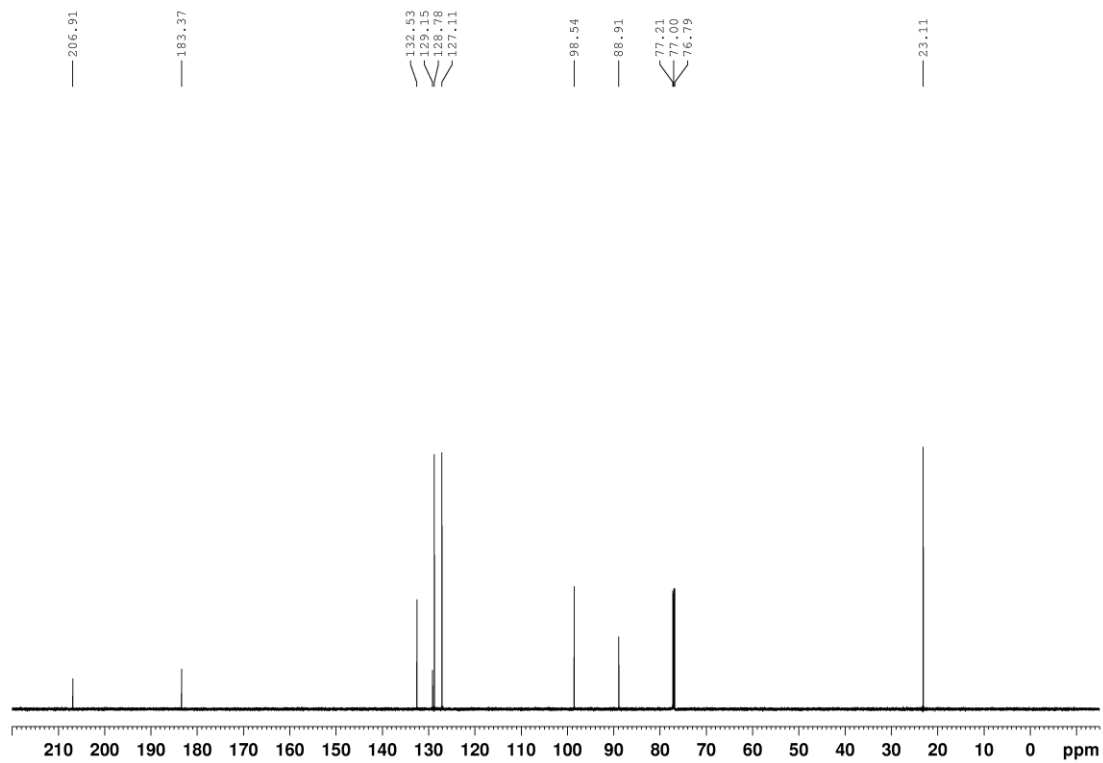

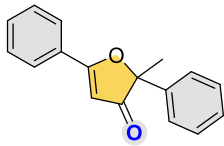

**2br**

<sup>1</sup>H NMR spectrum was recorded on 400 MHz in CDCl<sub>3</sub>.

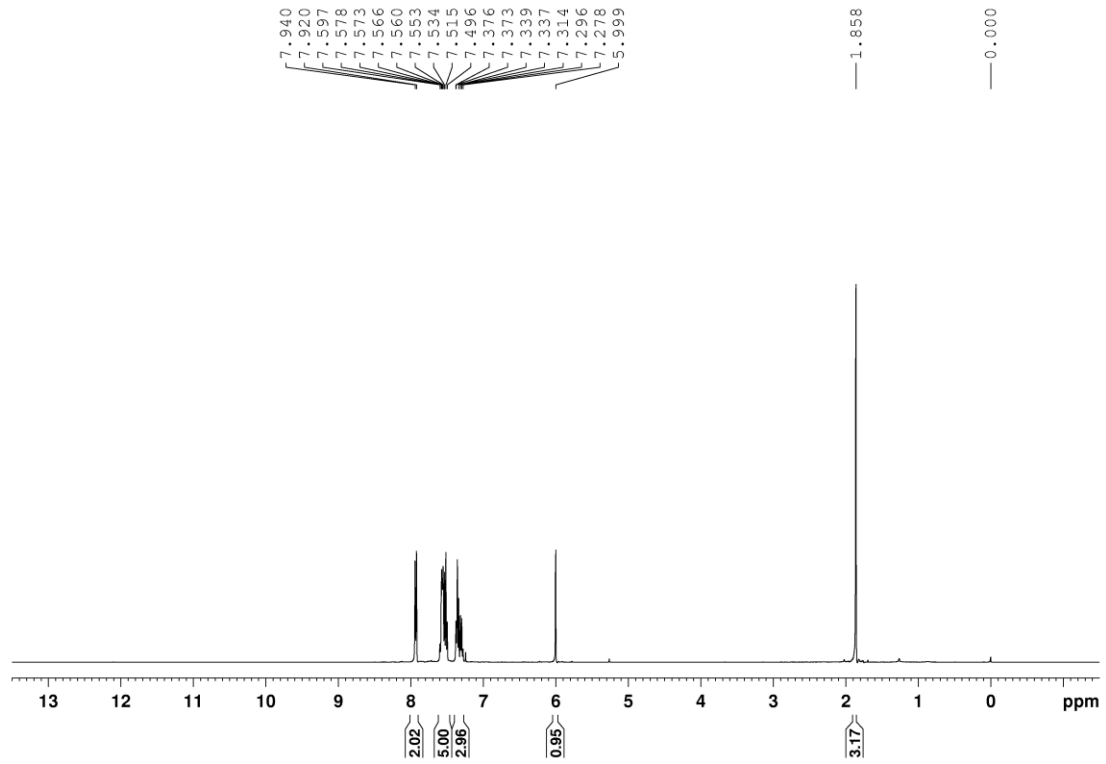

<sup>13</sup>C{<sup>1</sup>H} NMR spectrum was recorded on 151 MHz in CDCl<sub>3</sub>.

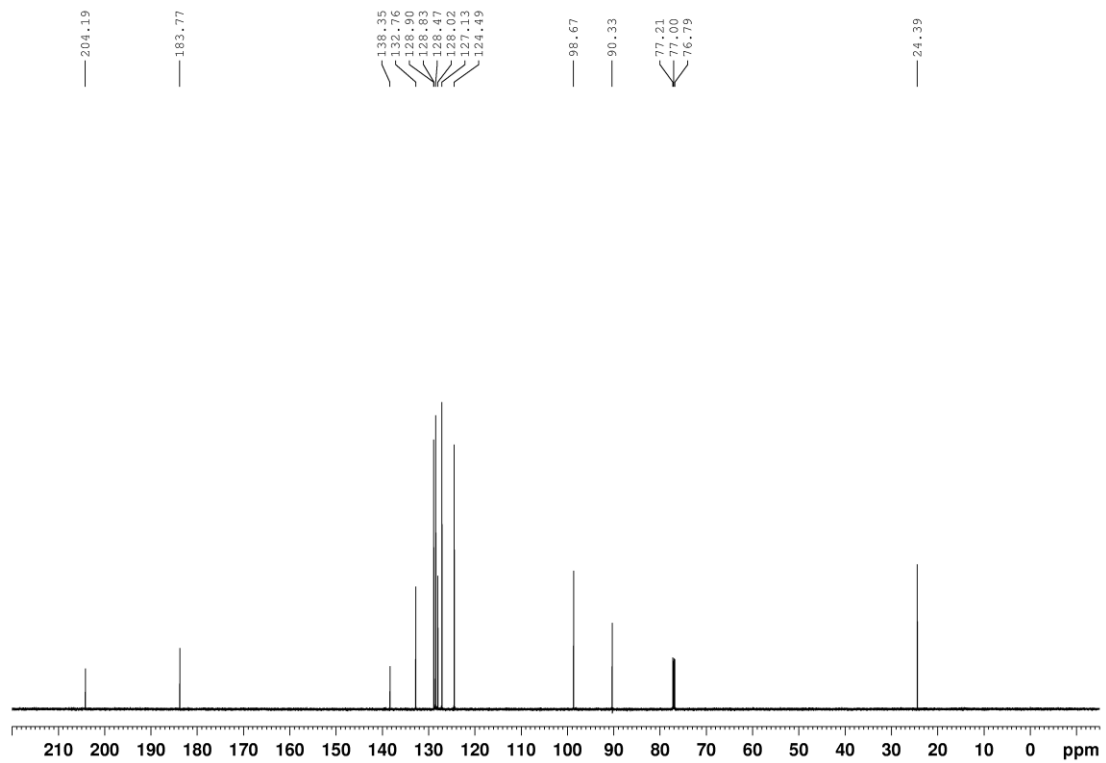

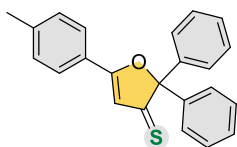

**3ab**

$^1\text{H}$  NMR spectrum was recorded on 400 MHz in  $\text{CDCl}_3$ .

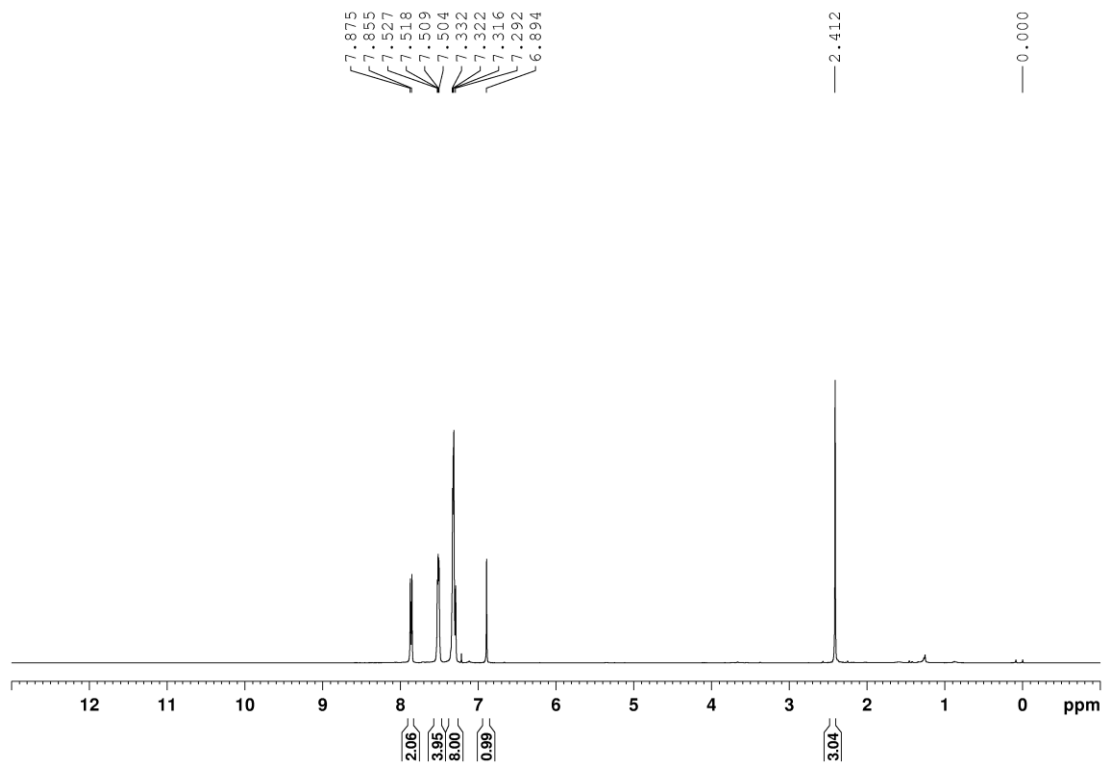

$^{13}\text{C}\{^1\text{H}\}$  NMR spectrum was recorded on 151 MHz in  $\text{CDCl}_3$ .

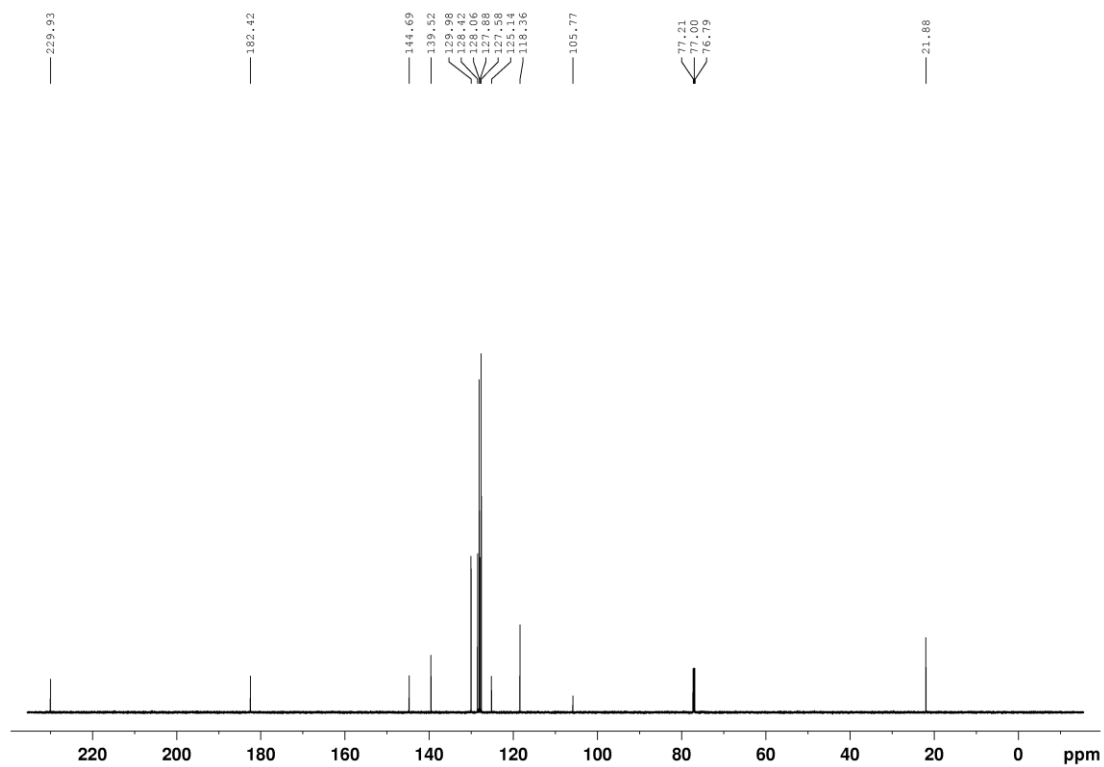

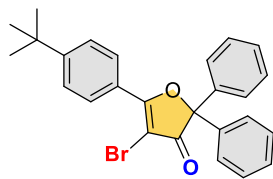

**3ad**

$^1\text{H}$  NMR spectrum was recorded on 400 MHz in  $\text{CDCl}_3$ .

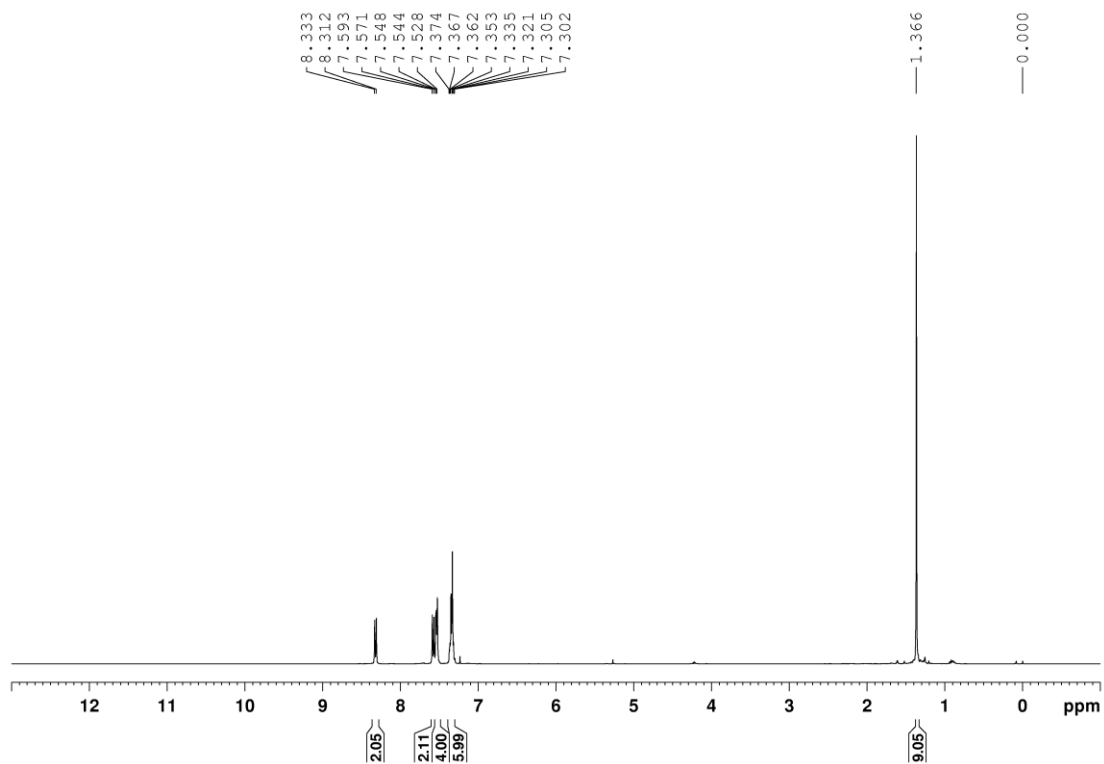

$^{13}\text{C}\{^1\text{H}\}$  NMR spectrum was recorded on 151 MHz in  $\text{CDCl}_3$ .

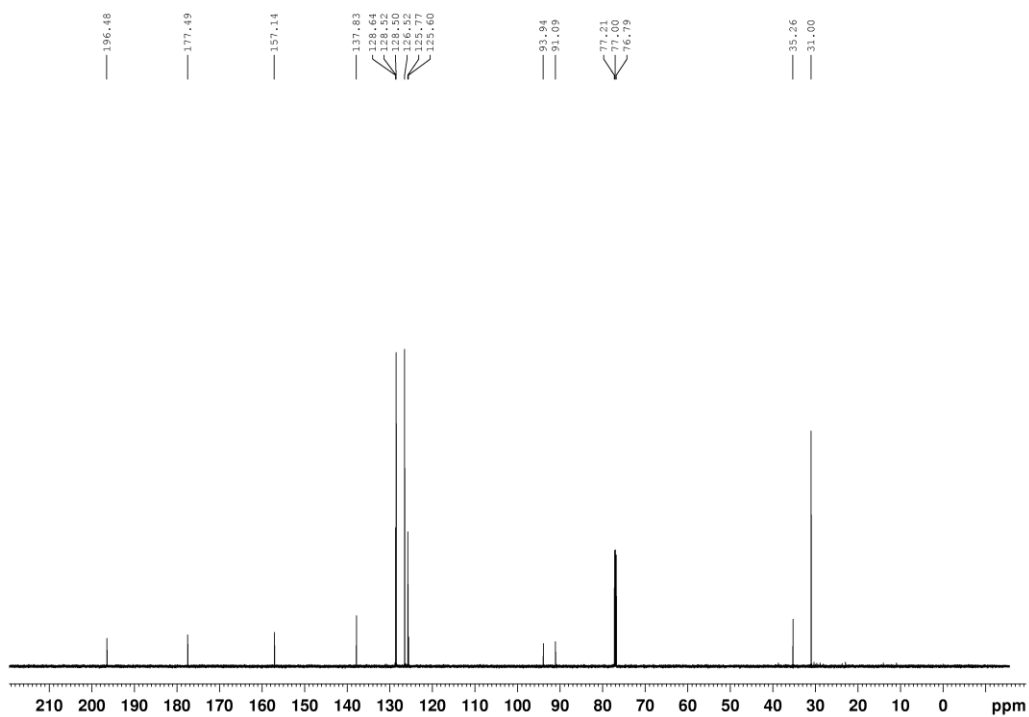

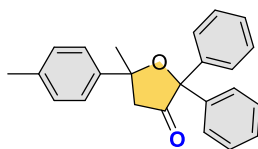

**4ab**

$^1\text{H}$  NMR spectrum was recorded on 400 MHz in  $\text{CDCl}_3$ .

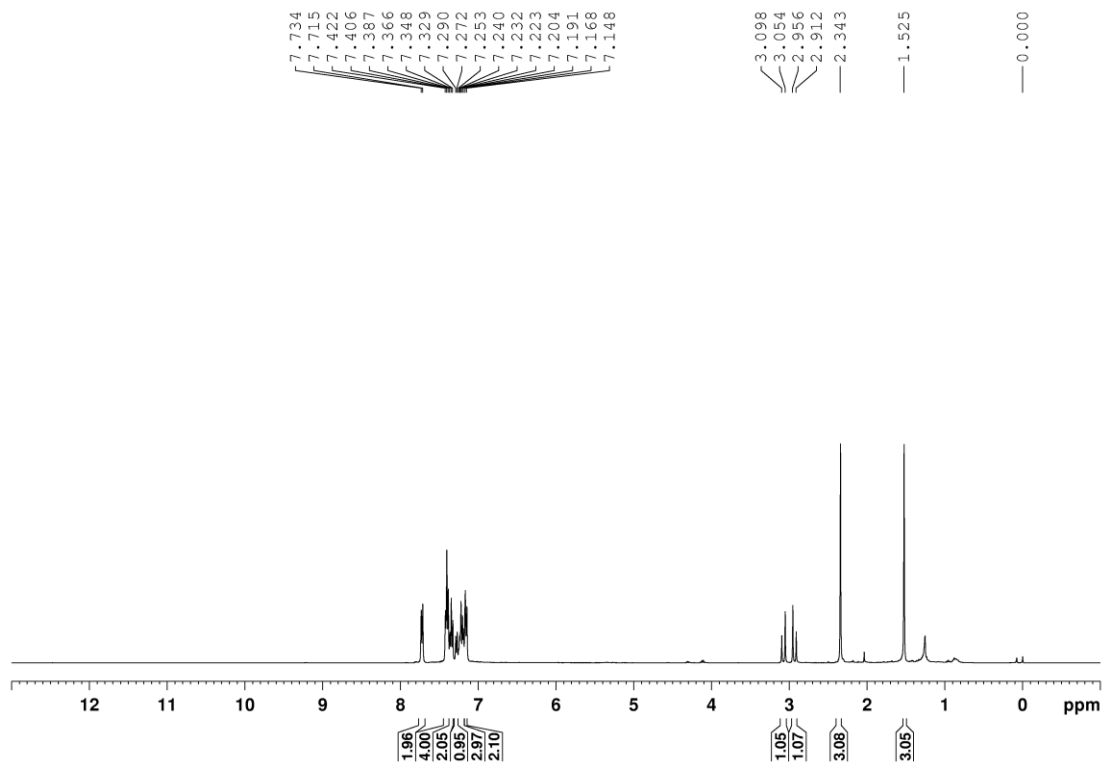

$^{13}\text{C}\{^1\text{H}\}$  NMR spectrum was recorded on 151 MHz in  $\text{CDCl}_3$ .

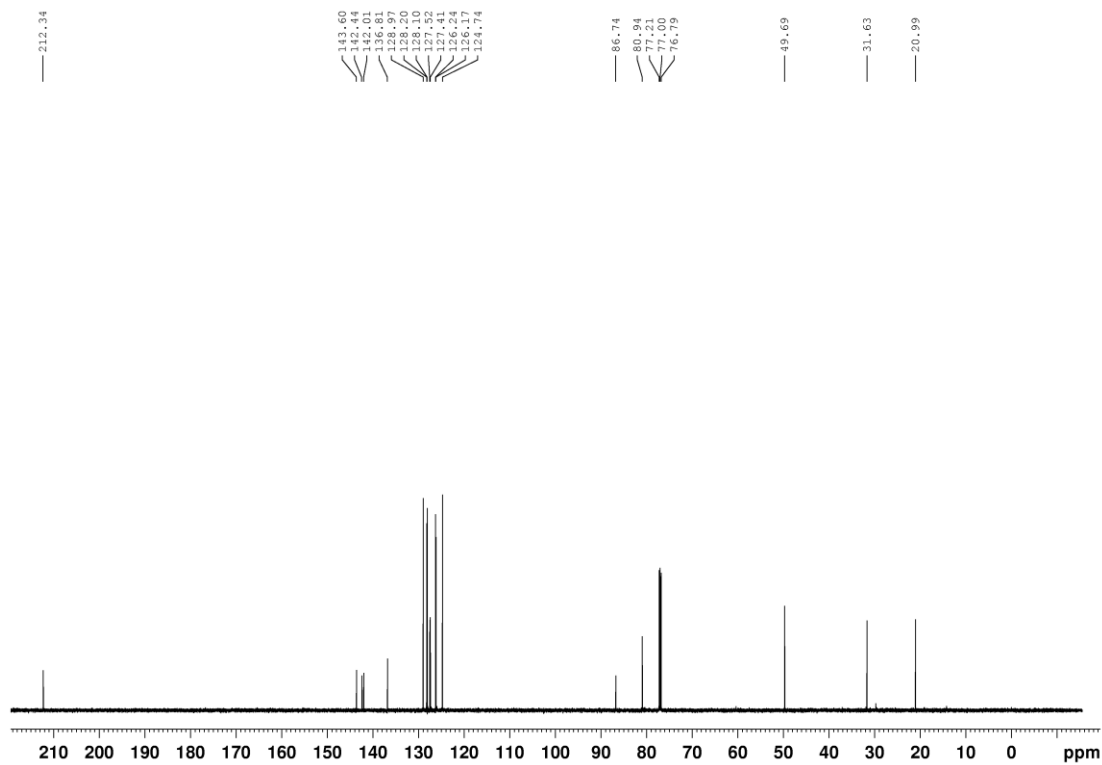

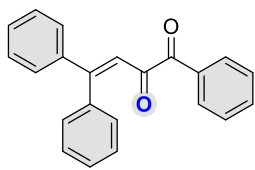

5a

$^1\text{H}$  NMR spectrum was recorded on 400 MHz in  $\text{CDCl}_3$ .

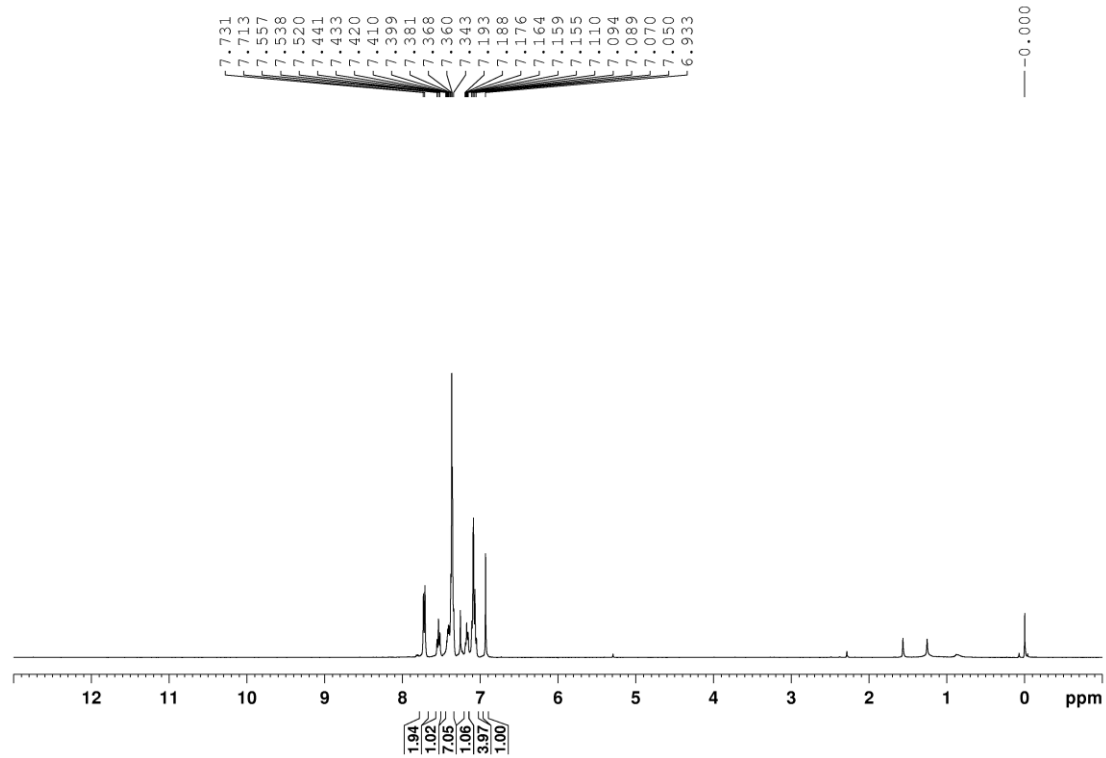

$^{13}\text{C}\{^1\text{H}\}$  NMR spectrum was recorded on 151 MHz in  $\text{CDCl}_3$ .

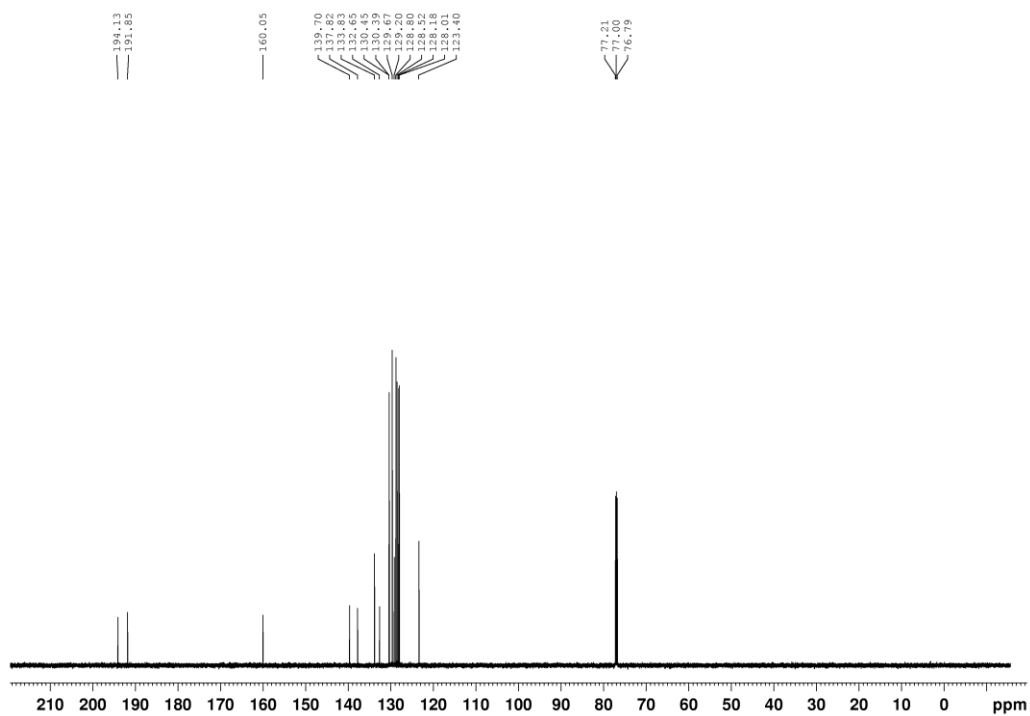

Supplement: d3ob01500a1.pdf [file d3ob01500a1.pdf]
